## **Investigation of the underlying hub genes and molecular pathogenesis in gastric cancer by integrated bioinformatic analyses**

Basavaraj Vastrad<sup>1</sup>, Chanabasayya Vastrad<sup>\*2</sup>

1. Department of Biochemistry, Basaveshwar College of Pharmacy, Gadag, Karnataka 582103, India.

2. Biostatistics and Bioinformatics, Chanabasava Nilaya, Bharthinagar, Dharwad 580001, Karnataka, India.

\* Chanabasayya Vastrad

channu.vastrad@gmail.com

Ph: +919480073398

Chanabasava Nilaya, Bharthinagar,

Dharwad 580001 , Karnataka, India

## Abstract

The high mortality rate of gastric cancer (GC) is in part due to the absence of initial disclosure of its biomarkers. The recognition of important genes associated in GC is therefore recommended to advance clinical prognosis, diagnosis and treatment outcomes. The current investigation used the microarray dataset GSE113255 RNA seq data from the Gene Expression Omnibus database to diagnose differentially expressed genes (DEGs). Pathway and gene ontology enrichment analyses were performed, and a protein-protein interaction network, modules, target genes - miRNA regulatory network and target genes - TF regulatory network were constructed and analyzed. Finally, validation of hub genes was performed. The 1008 DEGs identified consisted of 505 up regulated genes and 503 down regulated genes. The pathways and GO functions of the up and down regulated genes were mainly enriched in pyrimidine deoxyribonucleosides degradation, extracellular structure organization, allopregnanolone biosynthesis and digestion. FN1, PLK1, ANLN, MCM7, MCM2, EEF1A2, PTGER3, CKB, ERBB4 and PRKAA2 were identified as the most important genes of GC, and validated by TCGA database, The Human Protein Atlas database, receiver operating characteristic curve (ROC) analysis and RT-PCR. Bioinformatics analysis might be useful method to explore the molecular pathogenesis of GC. In addition, FN1, PLK1, ANLN, MCM7, MCM2, EEF1A2, PTGER3, CKB, ERBB4 and PRKAA2 might be the most important genes of GC.

**Keywords:** gastric cancer; bioinformatics analysis; proliferation; Gene Expression Omnibus (GEO); hub genes

## Introduction

Gastric cancer (GC) presents the major cause of cancer deaths in the past few decades and has been a major public health problem [1]. GC is the fifth most frequently detected cancer in worldwide [2]. Since GC absence reliable clinical and biochemical features in the initial stages, the majority of patients are only definitively identified with GC at a leading stage. Although some routine treatments such as surgery and chemotherapy can be used, the recurrence rate is still as high [3]. Thus, investigation on GC is important, especially on its molecular pathogenesis and the identification of biomarkers that are useful for early detection, risk stratification, determination of appropriate intervention, prognostication and identification of novel therapeutic targets.

Investigation has exposed key pathways and interactions between gene modifications, and tumorigenesis and tumor advancement of various types of cancers [4]. Pathways such as Wnt pathways [5], PI3K and MAPK signaling pathways [6], Notch1 signal pathway [7], STAT and ERK2 pathways [8] and Src/FAK pathway [9] were responsible for pathogenesis of GC. Genes such as IL-10 and TNF-A [10], p53 and TGF-,RII [11], IL-17A and IL-17F [12], PFKFB-3 and PFKFB-4 [13], and Runx3 and CHFR [14] were liable for pathogenesis of GC. Thus, a complete understanding of the transcriptional modification may add to the advancement of preventive, diagnostic and therapeutic strategies for GC.

The prognosis and diagnosis of GC mainly depends on the extent of disease. With the fast advancement of gene or RNA sequencing technology, GEO, ArrayExpress and TCGA have been playing enhancing key roles in bioinformatics analysis [15-17]. These databases provide sequencing data for research of novel functional genes and pathways and for analyzing the effect of these genes on prognosis, diagnosis and therapeutic.

The current investigation aimed to improve the understanding of the molecular basis of GC and to identify novel prognostic factors for GC. The GSE113255 RNA seq dataset was downloaded from the Gene Expression Omnibus (GEO) database, in order to determine the up regulated and down regulated differentially expressed genes (DEGs) in the tumor tissues of patients with GC. Several prognosis and diagnosis related genes and pathways of GC were

obtained through, pathway and gene ontology (GO) enrichment analysis, protein–protein interaction (PPI) network analysis, module analysis, target genes - miRNA regulatory network analysis and target genes – TF regulatory network analysis. To verify the prognostic roles of hub genes in GC, the GC dataset from The Cancer Genome Atlas (TCGA) was used to perform survival analysis, expression analysis, stage analysis, mutation analysis, immune histochemical (ICH) analysis and immune infiltration analysis. Secondly, the current investigation confirmed the selected findings using receiver operating characteristic (ROC) analysis), with the aim of prognostic and diagnostic value of hub genes. Finally, the most key expressed hub genes were selected and conducted for preliminary validation by real-time PCR (RT-PCR). In summery we believe that it is feasible to identify new genes linked with GC with the explained method, providing key intuition into the GC at the molecular level that guided the GC advancement and progression to full blown stages.

## **Materials and methods**

### **Microarray data**

RNA-seq Data relevant to GC was obtained from the GEO database and the GSE113255 (<https://www.ncbi.nlm.nih.gov/geo/query/acc.cgi?acc=GSE113255>) dataset was selected [18]. This dataset was established on a GPL18573 Illumina NextSeq 500 (Homo sapiens) platform. The GSE113255 dataset contains 107 diffuse type gastric cancer tissues samples and 10 normal gastric tissues samples.

### **Data pre-processing and identification of DEGs in GC**

Microarray data preprocessing is associated with quality assessment, quality control, background correction and normalization. Quantile method was used to perform background correction, normalization and probe summarization [19]. The empirical Bayesian method in limma package [20] was used to perform the differential analysis,  $|\log_2 \text{fold change (FC)}| > 1.5$  for up regulated genes,  $|\log_2 \text{fold change (FC)}| < -1.13$  for down regulated genes and adjusted  $P < 0.05$  were considered as statistically significant. Since dataset was diagnosed to have a larger sample size of both GC and healthy tissues, heat maps and volcano plots were further established from the RNA-seq data of this dataset in order to visualize DEGs.

## Pathway enrichment analysis of DEGs

BIOCYC (<https://biocyc.org/>) [21], Kyoto Encyclopedia of Genes and Genomes (KEGG) (<http://www.genome.jp/kegg/pathway.html>) [22], Pathway Interaction Database (PID) (<https://wiki.nci.nih.gov/pages/viewpage.action?pageId=315491760>) [23], REACTOME (<https://reactome.org/>) [24], GenMAPP (<http://www.genmapp.org/>) [25], MSigDB C2 BIOCARTA (<http://software.broadinstitute.org/gsea/msigdb/collections.jsp>) [26], PantherDB (<http://www.pantherdb.org/>) [27], Pathway Ontology (<http://www.obofoundry.org/ontology/pw.html>) [28] and Small Molecule Pathway Database (SMPDB) (<http://smpdb.ca/>) [29] are a databases collection which can be used to analyze genomes, biological pathways, diseases, chemical substances and drugs. ToppGene (ToppFun) (<https://toppgene.cchmc.org/enrichment.jsp>) [30] was used for annotation of the pathway results. For this analyses,  $p < 0.05$  was considered to indicate a statistically significant difference.

## Gene ontology (GO) enrichment analysis of DEGs

ToppGene (ToppFun) (<https://toppgene.cchmc.org/enrichment.jsp>) [30] was used to perform GO enrichment analysis. GO (<http://www.geneontology.org/>) enrichment analysis is extensively used to annotate specific genes and gene products for high throughput genome and transcriptome data [31]. In the current investigation, GO enrichment analysis was implemented to predict the probable functions of the DEGs based on biological process (BP), molecular function (MF) and cellular component (CC).  $p < 0.05$  was set as the cutoff criterion.

## PPI network construction and module analysis

We evaluated the protein–protein interaction (PPI) data using the Human Integrated Protein-Protein Interaction rEference (HIPPIE) (<http://cbdm.uni-mainz.de/hippie/>) database [32], which integrates with various PPI data bases such as IntAct (<https://www.ebi.ac.uk/intact/>) [33], BioGRID (<https://thebiogrid.org/>) [34], HPRD (<http://www.hprd.org/>) [35], MINT (<https://mint.bio.uniroma2.it/>) [36], BIND (<http://download.baderlab.org/BINDTranslation/>) [37], MIPS (<http://mips.helmholtz-muenchen.de/proj/ppi/>) [38] and DIP (<http://dip.doe-mbi.ucla.edu/dip/Main.cgi>) [39]. Cytoscape software (<http://www.cytoscape.org/>)

[40] was applied to visualize the protein interaction network relationships. With the plugin Network analyzer the gene lists of the top ranked in node degree [41], betweenness centrality [42], stress centrality [43], closeness centrality [44] and clustering coefficient [45] were obtained. PEWCC1 (<http://apps.cytoscape.org/apps/PEWCC1>), a plug-in used to produce the best results for considerate correlation levels, was subsequently utilized to identify modules in the network [46].

### **Target genes - miRNA regulatory network construction**

Relevant miRNA targets were predicted using miRNet database (available online: (<https://www.mirnet.ca/>) [47], which is a comprehensive atlas of predicted and validated target - miRNA interactions. The potential targets of miRNA were identified by 10 miRNA databases such as TarBase (<http://diana.imis.athena-innovation.gr/DianaTools/index.php?r=tarbase/index>) [48], miRTarBase (<http://mirtarbase.mbc.nctu.edu.tw/php/download.php>) [49], miRecords (<http://miRecords.umn.edu/miRecords>) [50], miR2Disease (<http://www.mir2disease.org/>) [51], HMDD (<http://www.cuilab.cn/hmdd>) [52], PhenomiR (<http://mips.helmholtz-muenchen.de/phenomir/>) [53], SM2miR (<http://bioinfo.hrbmu.edu.cn/SM2miR/>) [54], PharmacomiR (<http://www.pharmaco-mir.org/>) [55], EpimiR (<http://bioinfo.hrbmu.edu.cn/EpimiR/>) [56] and starBase (<http://starbase.sysu.edu.cn/>) [57]. The integrated regulatory networks were then visualized by Cytoscape (<http://www.cytoscape.org/>) [40].

### **Target genes - TF regulatory network construction**

Relevant TF targets were predicted using (<https://www.networkanalyst.ca/>) [58], which is a comprehensive atlas of predicted and validated target - TF interactions. The potential targets of TF were identified by TF database ChEA (<http://amp.pharm.mssm.edu/lib/chea.jsp>) [59]. The integrated regulatory networks were then visualized by Cytoscape (<http://www.cytoscape.org/>) [40].

### **Validations of hub genes**

The probability of survival and importance was determined using the UALCAN (<http://ualcan.path.uab.edu/analysis.html>) [60] database. UALCAN is a newly

created online interactive web server which implements users to examine the RNA sequencing expression data of tumors/normal tissues or samples from The Cancer Genome Atlas (TCGA), based on a criterion processing pipeline. The overall survival analyses of hub gene were performed in UALCAN. The RNA expression level of hub genes between GC samples and normal control samples was visualized by UALCAN. The RNA expression level of hub genes between different stages of GC samples compared to normal control samples was visualized by UALCAN. The cBio Cancer Genomics Portal (cBioPortal) (<http://www.cbioportal.org>) [61] is a key tool for online analysis, visualization, and examination of cancer genomics data. cBioPortal, which is the database used in this investigation, scrutinize genetic modifications of prognostic and diagnostic hub genes in TCGA GC patients. The expression levels of hub genes in cancerous and non cancerous tissue were validated using the Human Protein Atlas (HPA) database (<http://www.proteinatlas.org/>) [62]. To calculate whether established hub genes had key diagnostic and prognostic values for GC, the receiver operating characteristic (ROC) analyses was accomplished using the R “pROC” package [63]. The area under the ROC curve (AUC) of hub gene was determined. The diagnostic and prognostic accuracy of hub genes for GC was calculated with AUC value. Herein, when AUC value was larger than 0.8, the hub gene could differentiate GC from normal control. Hub genes were further validated by real time polymer chain reaction (RT-PCR). According to the manufacturer’s instruction, total RNA of gastric tissues in both GC groups and controls were extracted using the TRI Reagent® (Sigma, USA) and reversely transcribed to complementary DNA using the FastQuant RT kit (with gDNase; Tiangen Biotech Co., Ltd.). RT-PCR was completed by using QuantStudio 7 Flex real-time PCR system (Thermo Fisher Scientific, Waltham, MA, USA). The RT-PCR amplification reaction protocol was as follows: A total of 40 cycles at 95°C for 5 sec and 60°C for 10 sec. Relative quantification was achieved by using the comparative  $2^{-\Delta\Delta Cq}$  method [64] with  $\beta$ -actin as the reference gene. The sequences of all primer pairs are given in Table 1. Immune infiltration analysis was performed for hub genes using the TIMER online analysis tool (<https://cistrome.shinyapps.io/timer/>) [65], which incorporates the prognostic and diagnostic data from the RNA-Seq expression profiling database from The Cancer Genome Atlas (TCGA). Immune infiltration analysis was assigned to check the



immune infiltrates (B cells, CD4+ T cells, CD8+ T cells, neutrophils, macrophages, and dendritic cells) across GC.

## Results

### Data pre-processing and identification of DEGs in GC

NCBI-GEO is a free database of gene expression profiles and RNA-seq, from which GC and normal control RNA-seq data of GSE113255 were obtained. The expression values for all the genes from the 107 GC samples and 10 normal control samples were normalized using the Quantile method, and values with an unchanged position in the boxplot were used for consequent analysis, as this can be used as a intermediary for normalization (Fig. 1A and Fig. 1B). Using  $P < 0.05$ ,  $|\log_2 \text{fold change (FC)}| > 1.5$  for up regulated genes,  $|\log_2 \text{fold change (FC)}| < -1.13$  for down regulated genes as the cutoff criteria, after integrated bioinformatics analysis. A total of 1008 DEGs were identified in the active group, including 505 up regulated genes and 503 down regulated genes and are given in Table 2. Fig. 2 and Fig. 3 shows the heat maps of those up and down regulated genes, and reveals that the up and down regulated genes can be easily distinguished from each of the samples. The distribution patterns of expressed genes in GSE113255 data is displayed in Fig. 4, respectively. Red dots in the volcano plots mean significantly up regulated genes, while green dots mean significantly down regulated genes.

### Pathway enrichment analysis of DEGs

To analyze the biological importance of DEGs, pathway enrichment analyses were executed. Pathway enrichment analysis was predicted that up and down regulated genes were associated with several key physiological processes and are listed in Table 3 and Table 4. Up regulated genes were significantly enriched in pyrimidine deoxyribonucleosides degradation, aspirin triggered resolvin D biosynthesis, ECM-receptor interaction, protein digestion and absorption, syndecan-4-mediated signaling events, PLK1 signaling events, extracellular matrix organization, hemostasis, glutamate metabolism, pyrimidine metabolism, ensemble of genes encoding extracellular matrix and extracellular matrix-associated proteins, ensemble of genes encoding core extracellular matrix including ECM glycoproteins, collagens and proteoglycans, integrin signalling pathway, plasminogen activating cascade, altered lipoprotein metabolic, ammonia recycling



and MNGIE (Mitochondrial Neurogastrointestinal Encephalopathy), while down regulated genes were significantly enriched in allopregnanolone biosynthesis, gluconeogenesis, drug metabolism - cytochrome P450, chemical carcinogenesis, FOXA2 and FOXA3 transcription factor networks, RhoA signaling pathway, biological oxidations, phase 1 - functionalization of compounds, carbon fixation, fatty acid metabolism, ensemble of genes encoding extracellular matrix and extracellular matrix-associated proteins, ensemble of genes encoding ECM-associated proteins including ECM-affiliated proteins, ECM regulators and secreted factors, 5-Hydroxytryptamine degradation, fructose galactose metabolism, lipoprotein metabolic, pirenzepine pathway and tyrosine metabolism.

### **Gene ontology (GO) enrichment analysis of DEGs**

We uploaded all up and down regulated genes to the online software ToppGene to identify overrepresented GO categories. GO analysis results showed that up regulated genes were significantly enriched in BP, CC and MF, including extracellular structure organization, cell adhesion, extracellular matrix, collagen-containing extracellular matrix, extracellular matrix structural constituent and structural molecule activity, while down regulated genes were significantly enriched in BP, CC and MF, including digestion, organic acid metabolic process, apical part of cell, extracellular matrix, oxidoreductase activity and transition metal ion binding and are listed in Table 5 and Table 6.

### **PPI network construction and module analysis**

All the up and down regulated genes were entered into the HIPPIE database to obtain the interaction data. The protein-protein interaction (PPI) network of up regulated genes exhibited 3222 nodes and 4943 edges and is shown in Fig 5. The hub genes with highest node degree distribution, betweenness centrality, stress centrality, closeness centrality and lowest clustering coefficient were as follows: FN1, NOTCH1, PLK1, ANLN, MDFI, CPZ, PRKDC, TREM1, TREM2, CYP2W1, CST1, CCL3, PLXDC2, AMIGO2 and GPR161, and are listed in Table 7. The statistical scores of node degree distribution, betweenness centrality, stress centrality, closeness centrality and clustering coefficient are shown as scatter plot in Fig. 6A - 6E. The functional enrichment analysis showed that these hub genes were significantly involved in ECM-receptor interaction, microRNAs in cancer, PLK1

signaling events, cell migration, animal organ morphogenesis, extracellular matrix, phosphotransferase activity, alcohol group as acceptor, molecular transducer activity, axon guidance, endoplasmic reticulum lumen, peptidase activity, identical protein binding, ensemble of genes encoding extracellular matrix and extracellular matrix-associated proteins, cell adhesion and whole membrane. Similarly, protein-protein interaction (PPI) network of down regulated genes exhibited 5142 nodes and 8412 edges and is shown in Fig 7. The hub genes with highest node degree distribution, betweenness centrality, stress centrality, closeness centrality and lowest clustering coefficient were as follows: SOX2, RIPK4, FOXA1, EEF1A2, ANG, FGB, CNTD1, GGT6, PTGDR2, ADH1C, DCAF12L1, CAPN9 and TTC39A, and are listed in Table 7. The statistical scores of node degree distribution, betweenness centrality, stress centrality, closeness centrality and clustering coefficient are shown as scatter plot in Fig. 8A - 8E. The functional enrichment analysis showed that these hub genes were significantly involved in developmental biology, kinase activity, FOXA2 and FOXA3 transcription factor networks, metabolism of proteins, ensemble of genes encoding extracellular matrix and extracellular matrix-associated proteins, hemostasis, metabolic pathways, intrinsic component of plasma membrane, drug metabolism - cytochrome P450 and digestion.

Furthermore, the PEWCC1 plugin was applied to investigate highly interconnected regions, known as modules, in the PPI network. Total 668 modules were isolated from PPI network of up regulated genes and four significant modules with the highest scores are shown in Fig. 9. Module 2, consisting of 156 nodes and 175 edges, was highly enriched in microRNAs in cancer, innate immune system, pathways in cancer and notch signaling pathway. Module 5, consisting of 133 nodes and 165 edges, was highly enriched in cell migration, microRNAs in cancer, signaling by Rho GTPases, focal adhesion and cell junction. Module 6, consisting of 118 nodes and 120 edges, was highly enriched in animal organ morphogenesis, G alpha (i) signalling events, water transport, notch signaling pathway and cell migration. Module 9, consisting of 81 nodes and 40 edges, was highly enriched in cell cycle, ATP binding, E2F transcription factor network, identical protein binding, regulation of cell population proliferation and pyrophosphatase activity. Similarly, total 1078 modules were isolated from PPI network of down regulated genes and four significant modules with the highest scores are shown in Fig. 10. Module 6, consisting of 120 nodes and 154 edges, was highly enriched in

metabolism of proteins, hemostasis, developmental biology, ensemble of genes encoding extracellular matrix and extracellular matrix-associated proteins and ensemble of genes encoding core extracellular matrix including ECM glycoproteins, collagens and proteoglycans. Module 7, consisting of 114 nodes and 115 edges, was highly enriched in neuroactive ligand-receptor interaction, oxidation-reduction process, gastric acid secretion and metabolism of proteins. Module 10, consisting of 100 nodes and 116 edges, was highly enriched in developmental biology, molecular function regulator, ensemble of genes encoding extracellular matrix and extracellular matrix-associated proteins, metabolism of proteins and biological adhesion. Module 15, consisting of 91 nodes and 95 edges, was highly enriched in gastric acid secretion, nitrogen metabolism, FOXA2 and FOXA3 transcription factor networks, metabolism of proteins, transmembrane transport of small molecules, chemical homeostasis, apical part of cell, secretion, pirenzepine pathway, digestion, and protein digestion and absorption.

### **Target genes - miRNA regulatory network construction**

The target genes - miRNA regulatory network of up regulated genes was shown in Fig. 11, consisting of 2669 nodes and 10414 interactions. The nodes with high degree score (interaction with maximum number of miRNAs) can be regarded as essential network nodes. The top target genes with higher degree included FOXK1 interacts with 259 miRNAs (ex,hsa-mir-5693), CCND2 interacts with 179 miRNAs (ex,hsa-mir-3976), RCC2 interacts with 135 miRNAs (ex,hsa-mir-3911), CCDC80 interacts with 135 miRNAs (ex,hsa-mir-6083) and E2F3 interacts with 135 miRNAs (ex,hsa-mir-4271), and are listed in Table 7. The functional enrichment analysis showed that these target genes were significantly involved in peptidase activity, PI3K-Akt signaling pathway, cell cycle, extracellular structure organization and regulation of cell population proliferation. Similarly, target genes - miRNA regulatory network of down regulated genes was shown in Fig. 12, consisting of 2220 nodes and 5985 interactions. The top target genes with higher degree included GATA6 interacts with 207 miRNAs (ex, hsa-mir-4284), SULT1B1 interacts with 131 miRNAs (ex, hsa-mir-4643), GLUL interacts with 126 miRNAs (ex, hsa-mir-4459), ENPP5 interacts with 114 miRNAs (ex,hsa-mir-8082) and KLF2 interacts with 107 miRNAs (ex,hsa-mir-5193) and are listed in Table 7. The functional enrichment analysis showed that these target genes were

significantly involved in notch-mediated HES/HEY network, biological oxidations, metabolic pathways, intrinsic component of plasma membrane and response to endogenous stimulus.

### **Target genes - TF regulatory network construction**

The target genes - TF regulatory network of up regulated genes was shown in Fig. 13, consisting of 657 nodes and 10767 interactions. The nodes with high degree score (interaction with maximum number of TFs) can be regarded as essential network nodes. The top target genes with higher degree included ABCA13 interacts with 247 TFs (ex, SOX2), ACTN1 interacts with 215 TFs (ex, MYC), ABCD1 interacts with 202 TFs (ex, EGR1), ADAMTS14 interacts with 202 TFs (ex, SPI1) and ADAMTS4 interacts with 194 TFs (ex, NANOG) and are listed in Table 8. The functional enrichment analysis showed that these target genes were significantly involved in neutrophil degranulation, focal adhesion, regulation of phosphate metabolic process, peptidase activity and extracellular matrix organization. Similarly, target genes - TF regulatory network of down regulated genes was shown in Fig. 14, consisting of 639 nodes and 7623 interactions. The top target genes with higher degree included DNER interacts with 177 (ex, TP63), CKB interacts with 169 (ex, STAT3), PKIB interacts with 165 (ex, HNF4A), RAB27B interacts with 164 (ex, AR) and IRX3 interacts with 150 (ex, SUZ12) and are listed in Table 8. The functional enrichment analysis showed that these target genes were significantly involved in neuron projection, gastric acid secretion, molecular function regulator and pancreatic secretion.

### **Validations of hub genes**

Up regulated hub genes and down regulated hub genes were then validated in database TCGA to confirm the outcomes. We tried to analysis the relationship between hub genes and the survival in GC. The prognostic and diagnostics value of hub genes was determined by UALCAN database. Patients with high expression of FN1 (Fig. 15A), PLK1 (Fig. 15B), ANLN (Fig. 15C), MCM7 (Fig. 15D), MCM2 (Fig. 15E), EEF1A2 (Fig. 16A), PTGER3 (Fig. 16B), CKB (Fig. 16C), ERBB4 (Fig. 16D) and PRKAA2 (Fig. 16E) were associated with shorter overall survival. The UALCAN box plot analysis investigated the level of expression of the hub genes in 415 GC tissue samples and 34 normal tissue samples. The boxplot in Fig.

17A - Fig. 17E shows a considerable increase in the level of hub gene expression (FN1, PLK1, ANLN, MCM7 and MCM2) in the GC, while boxplot in Fig. 17F - Fig. 17J shows a considerable decrease in the level of hub gene expression (EEF1A2, PTGER3, CKB, ERBB4 and PRKAA2) in the GC. Furthermore, the UALCAN box plot analysis investigated the level of expression of the hub genes in individual GC stages (stage 1 (18 GC samples), stage 2 (123 GC samples), stage 3 (169 GC samples) and stage 4 (41 GC samples)) and 34 normal tissue samples. The boxplot in Fig. 18A - Fig. 18E shows a considerable increase in the level of hub gene expression (FN1, PLK1, ANLN, MCM7 and MCM2) in all four individual stages of GC, while boxplot in Fig. 18F - Fig. 18J shows a considerable decrease in the level of hub gene expression (EEF1A2, PTGER3, CKB, ERBB4 and PRKAA2) in all four individual stages of GC. Based on the results of the cBioPortal database, results of genomic modifications for these hub genes were depicted by using the cBioPortal. We found 6%, 5%, 3%, 8%, 4%, 5%, 1.4%, 0.7%, 13% and 2.5% of GC cases exhibited FN1, PLK1, ANLN, MCM7, MCM2, EEF1A2, PTGER3, CKB, ERBB4 and PRKAA2 hub genes modification including inframe mutation (unknown significance), missense mutation (putative driver), deep deletion, missense mutation (unknown significance), amplification and truncating mutation (unknown significance) and are shown in Fig. 19. Additionally, the expression and distribution of the hub genes (proteins) in GC samples and nontumor samples were measured through immunohistochemistry (IHC). IHC analysis of FN1, PLK1, ANLN, MCM7, MCM2, EEF1A2, PTGER3, CKB, ERBB4 and PRKAA2 in GC samples were found in the HPA database. The antibodies used were as follows: FN1 (CAB000126), PLK1 (HPA051638), ANLN (HPA050556), MCM7 (CAB016312), MCM2 (CAB000303), EEF1A2 (CAB034019), PTGER3 (HPA010689), CKB (HPA001254), ERBB4 (CAB000276) and PRKAA2 (HPA044540). Up regulated hub genes such as FN1, PLK1, ANLN, MCM7 and MCM2 were highly expressed in GC tissue but undetectable or expressed at low levels in normal tissue (Fig. 20A - Fig. 20E). Down regulated hub genes such as EEF1A2, PTGER3, CKB, ERBB4 and PRKAA2 were less expressed in GC tissue but detectable or expressed at high levels in normal tissue (Fig. 20F - Fig. 20J). The ROC curve analysis was accomplished to assess the diagnostic and prognostic values of hub genes. Our finding revealed that FN1 (AUC = 0.979), PLK1 (AUC = 0.921), ANLN (AUC = 0.946), MCM7 (AUC = 0.978), MCM2 (AUC = 0.961), EEF1A2 (AUC = 0.955),



PTGER3 (AUC = 0.934), CKB (AUC = 0.869), ERBB4 (AUC = 0.769) and PRKAA2 (AUC = 0.761) had significant diagnostic and prognostic values for discriminating GC samples and normal controls (Fig. 21). Furthermore, RT-PCR was used to verify the expression levels of the hub genes in primary GC and normal control tissue. In the GC tissues, FN1, PLK1, ANLN, MCM7 and MCM2 were significantly up regulated as compared with those in their normal control tissue, while in GC samples EEF1A2, PTGER3, CKB, ERBB4 and PRKAA2 were significantly down regulated as compared with those in their normal control tissue. These results indicated that, consistent with the TCGA results, most of these hub genes were dysregulated in GC samples compared with those in the normal control samples (Fig. 22). Finally, we investigated whether FN1, PLK1, ANLN, MCM7, MCM2, EEF1A2, PTGER3, CKB, ERBB4 and PRKAA2 expression were associated with tumor immune infiltration level by using the TIMER database. Interestingly, we found that the high expression of FN1, PLK1, ANLN, MCM7 and MCM2 were significantly negatively related to tumor purity, while low expression EEF1A2, PTGER3, CKB, ERBB4 and PRKAA2 were significantly positively related to tumor purity (Fig. 23).

## Discussion

The frequency and fatality of GC were still on the increase in many countries. Gene alterations and abnormal expression have been exhibited in the advancement of GC. Understanding the molecular pathogenesis of GC is very essential for prognosis, diagnosis and treatment. With the advancement of microarray and high throughput RNA sequencing, the alternative expression levels of thousands of genes could be together examined. Consolidate and reanalyzing microarray data provide key data including hub genes, biological functions, and signaling pathways, which reveal novel clues for the prognosis, diagnosis and treatment of GC.

In this investigation, we extracted the RNA-seq data of GSE113255 from the GEO dataset with high-quality data and clinical characters. A total of 1008 DEGs were identified following RRA analysis, including 505 up and 503 down regulated genes. Genes such as COL4A1 [66], INHBA (inhibin subunit beta A) [67], RCC2 [68], THY1 [69], ADH7 [70], ATP4A [71], MAL (mal, T cell differentiation protein) [72] and ATP4B [73] were linked with development of GC. Polymorphic



gene MSR1 was liable for advancement of prostate cancer [74], but this polymorphic gene may be involved in development of GC. Increases expression of CCKAR (cholecystokinin A receptor) was responsible for pathogenesis of gallbladder cancer [75], but over expression this gene may be important for advancement for GC.

To explore the possible role of up and down regulated genes in GC, we performed pathway enrichment analysis. Enriched up regulated genes such as TYMP (thymidine phosphorylase) [76], COL1A1 [77], COL1A2 [78], COL6A3 [79], FN1 [80], SPP1 [81], ITGA5 [82], THBS1 [83], THBS2 [78], THBS4 [84], MMP9 [85], ADAM12 [86], MFAP2 [87], FBN1 [88], MMP1 [89], MMP3 [90], MMP7 [91], MMP11 [92], MMP14 [93], MMP16 [94], NID2 [95], COL10A1 [96], COL11A1 [97], COL12A1 [98], ADAMTS2 [99], ICAM1 [100], VCAN (versican) [101], CTSK (cathepsin K) [102], HTRA1 [103], ASPN (asporin) [101], P4HA3 [104], BGN (biglycan) [105], BMP1 [106], ADAMTS9 [107], SERPINH1 [108], TIMP1 [109], LOXL2 [110], SERPINE1 [111], LTBP2 [112], LUM (lumican) [113], CLEC5A [114], EMILIN2 [115], SERPINB5 [116], SERPINE2 [117], MGP (matrix Gla protein) [118], AEBP1 [119], SPON2 [120], AGT (angiotensinogen) [121], CXCL9 [122] CTHRC1 [123], CCL3 [124], PLAU (plasminogen activator, urokinase) [125], C1QTNF6 [126], CCL18 [127], CXCL6 [128], SFRP2 [129], ANGPT2 [130], GDF15 [131], WNT2 [132], IGFBP7 [133], IL6 [134], IL11 [135], SPOCK1 [136], FNDC1 [137], SRPX2 [138], SULF2 [139], SULF1 [140], PLXDC1 [141], MUC16 [142], ESM1 [143], CXCL1 [144], TGFBI (transforming growth factor beta induced) [145], OSM (oncostatin M) [146], ANGPTL2 [147], FSTL1 [148], HMCN1 [149], PLXNC1 [150], GREM1 [151] and ITGBL1 [152] were involved in development of GC. Enriched up regulated genes such as COL4A2 [153], ITGA11 [154], LAMA5 [155], COL5A2 [156], ADAMTS4 [157], ADAMTS14 [158], ANXA13 [159], HTRA3 [160] and ADAMTS12 [161] were responsible for invasion of various types of cancer cells, but these genes may be associated with invasion of GC cells. Enriched up regulated genes such as COMP (cartilage oligomeric matrix protein) [162], TNC (tenascin C) [163], ITGB8 [164], FSTL3 [165] and PLXNA1 [166] were important for proliferation of many cancer cells types, but these genes may be liable for proliferation of GC cells. High expression of enriched genes such as COL3A1 [167], COL5A1 [168], COL7A1 [169], COL8A1 [170], CTSB (cathepsin B)

[171], ELN (elastin) [172], CD109 [173], SERPINB9 [174], BMP8A [175], SEMA6B [176], MXRA5 [177], SFRP4 [178], CHRDL2 [179], CST1 [180], HAPLN3 [181], PXDN (peroxidasin) [182] and TGM2 [183] were liable for progression of many cancer types, but over expression of these genes may be responsible for pathogenesis of GC. Polymorphic gene COL18A1 was associated with progression of breast cancer [184], but this polymorphic gene may be linked with development of GC. Methylation inactivation of CPS1 was linked with development of hepatocellular carcinoma [185], but inactivation of this gene may be culpable for progression of GC. PGF (placental growth factor) was linked with angiogenesis in hepatocellular carcinoma [186], but this gene may be involved in angiogenesis in GC. Our investigation established that UPP1, ACTN1, ACAN (aggrecan), COL15A1, COL16A1, COL5A3, SPARC (secreted protein acidic and cysteine rich), ITGAX (integrin subunit alpha X), PCOLCE (procollagen C-endopeptidase enhancer), CAD (carbamoyl-phosphate synthetase 2, aspartate transcarbamylase, and dihydroorotase), CLEC7A, CRISPLD1, OMD (osteomodulin), LIF (LIF interleukin 6 family cytokine), PLXDC2, LGI2, TNFAIP6, PARVG (parvin gamma) and SDS (serine dehydratase) are up regulated in GC and has possible as a new diagnostic and prognostic biomarker, and therapeutic target. Enriched down regulated genes such as AKR1C3 [187], AKR1C2 [188], ADH1C [189], CYP2C19 [190], CYP3A4 [191], CYP3A5 [191], GSTA1 [192], GSTA3 [193], FOXA1 [194], FOXA2 [195], TTR (transthyretin) [196], ALDOB (aldolase, fructose-bisphosphate B) [197], APOA1 [198], ALDH1A1 [199], FBP2 [200], S100P [201], CCL28 [202], FGA (fibrinogen alpha chain) [193], FGB (fibrinogen beta chain) [203], FGG (fibrinogen gamma chain) [193], IGFBP2 [204], SCUBE2 [205], PDGFD (platelet derived growth factor D) [206], CTSE (cathepsin E) [207], MUC1 [208], MUC6 [209], SERPINB7 [210], NRG4 [211], SEMA3B [212], MUC5B [213], ANXA10 [214], REG3A [215], HRH2 [216], SST (somatostatin) [217] and CCKBR (cholecystokinin B receptor) [218] were associated with advancement of GC. Enriched down regulated genes such as AKR1C1 [219], MAOA (monoamine oxidase A) [220], ALDH3A1 [221], UGT1A10 [222], CYP2S1 [223], ME1 [224], FBP1 [225], GPT (glutamic--pyruvic transaminase) [226], COL2A1 [227], COL17A1 [228], HYAL1 [229], CSTA (cystatin A) [230], ADAM28 [231], BMP5 [232], ANGPTL3 [233], DPT (dermatopontin) [234] and APOBEC1 [235] were linked with invasion of many types of cancer cells, but these genes may be involved in invasion of GC cells.

Enriched polymorphic genes such as UGT1A6 [236], CYP2C8 [237], CYP2C9 [238], GSTA2 [239], SULT2A1 [240], ADAMTSL1 [241], SERPINA5 [242] and APOC3 [243] were important for pathogenesis of many cancer types, but these polymorphic genes may be responsible for development of GC. Low expression of enriched genes such as AKR7A3 [244], ALDOC (aldolase, fructose-bisphosphate C) [245], SERPINA4 [246], ADAMTS15 [247], CCBE1 [248] and CLEC3B [249] were liable for progression of many cancer types, but decrease expression of these genes may be responsible for advancement of GC. Methylation inactivation of CXCL14 was linked with progression of colorectal cancer [250], but loss of this gene may be key for development of GC. Our investigation established that FMO5, FOXA3, CMBL (carboxymethylenebutenolidase homolog), AADAC (arylacetamidideacetylase), GGT6, CYP4F12, CYP2C18, ACSM1, SULT1B1, SULT1C2, LGALS9C, COL6A5, F13A1, PAPP2, COL4A6, HAPLN1, IGFALS (insulin like growth factor binding protein acid labile subunit), SLPI (secretory leukocyte peptidase inhibitor), LGALS9B and APOA4 are down regulated in GC and has possible as a new diagnostic and prognostic biomarker, and therapeutic target.

To explore the possible role of up and down regulated genes in GC, we performed GO enrichment analysis. Methylation inactivation of enriched up regulated genes such as ABCA1 [251], FLRT2 [252] and CDH13 [253] were liable for progression of many cancer types, but inactivation of these genes may be involved in growth of GC. Enriched up regulated genes such as FAP (fibroblast activation protein alpha) [254], ANTXR1 [255], FOXC1 [256], OLFML2B [257], APOC1 [258], APOE (apolipoprotein E) [259], PDPN (podoplanin) [260], FSCN1 [261], NOTCH1 [262], TNFRSF11B [263], CHI3L1 [264] and CD248 [265] were responsible for progression of GC. LIPG (lipase G, endothelial type) was liable for proliferation of breast cancer [266], but this gene may be liable for proliferation of GC cells. Enriched up regulated genes such as CCDC80 [267], PLA2G7 [268] and ENTPD1 [269] were associated with invasion of many types of cancer cells, but these genes may be linked with invasion of GC cells. Our investigation established that SH3PXD2B, CPZ (carboxypeptidase Z) and LRRC32 are up regulated in GC and has possible as a new diagnostic and prognostic biomarker, and therapeutic target. Enriched down regulated genes such as PGC (progastricsin) [270], AQP5 [271], CAPN9 [272], VSIG1 [273], KCNQ1 [274], TFF1 [275], TFF2 [276], CD36

[277], GKN1 [278], SCNN1B [279], FOLR1 [280], DUOX2 [281], RAB27A [282], HPGD (15-hydroxyprostaglandin dehydrogenase) [283], FA2H [284], LIPF (lipase F, gastric type) [285], GCKR (glucokinase regulator) [286], AKR1B10 [287], NQO1 [288], SELENBP1 [289] and GPX3 [290] were involved in development of GC. Enriched down regulated genes such as PBLD (phenazine biosynthesis like protein domain containing) [291], HPN (hepsin) [292], HOMER2 [293], DUOXA2 [294], SLC9A1 [295], DUOX1 [296], CA2 [297], CDH2 [298], ACADL (acyl-CoA dehydrogenase long chain) [299], PDIA2 [300], CYB5A [301], GALE (UDP-galactose-4-epimerase) [302], DHCR24 [303] and HBB (hemoglobin subunit beta) [304] were liable for invasion of many types of cancer cells, but these genes may be involved in invasion of GC cells. Low expression of enriched genes such as PTGER3 [305], RAB27B [306], ESRRB (estrogen related receptor beta) [307], ALDH6A1 [308], DHRS7 [309], LDHD (lactate dehydrogenase D) [310], DHRS9 [311] and ENTPD5 [312] were important for progression of many cancer types, but decrease expression of these genes may be responsible for advancement of GC. Enriched down regulated genes such as PRKAA2 [313], PTGR1 [314], ADHFE1 [315] and RGN (regucalcin) [316] were involved in proliferation of many types of cancer cells, but these genes may be associated with proliferation of GC cells. Our investigation established that PGA5, ASAH2, SLC26A7, CHIA (chitinase acidic), GHRL (ghrelin and obestatinprepropeptide), CAPN8, PGA3, PGA4, SLC9A4, GUCA2B, PROM2, UPK1B, SCNN1G, EPB41L4B, MYRIP (myosin VIIA and rab interacting protein), SLC26A9, SLC9A3, CDHR2, CA4, AQP10, PDZD3, HGD (homogentisate 1,2-dioxygenase), ERO1B, RDH12, AKR1B15 and TM7SF2 are down regulated in GC and has possible as a new diagnostic and prognostic biomarker, and therapeutic target.

The PPI network and module analysis found that DEGs were considered as up and down regulated hub genes in the network and modules. Up regulated hub genes such PLK1 [317], ANLN (anillin actin binding protein) [318], TREM2 [319], AMIGO2 [320], LEF1 [321], NOTCH3 [322], RAI14 [323], AQP1 [324], HOXB9 [325], MCM7 [326], MCM2 [327], CDC6 [328] and GINS4 [329] were liable for advancement of GC. Methylation inactivation of up regulated hub genes such as MDFI (MyoD family inhibitor) [330] and HEYL (hes related family bHLH transcription factor with YRPW motif like) [331] were involved in the progression

of many cancer types, but inactivation of these genes may be key for advancement of GC. Increased expression of hub genes such as TREM1 [332], CYP2W1 [333], GPR161 [334], ARHGAP11A [335], APLN (apelin) [336], CBX2 [337], ORC1 [338] and MCM10 [339] were linked with development of many cancer types, but over expression of these genes may be liable for advancement of GC. Our investigation established that PRKDC (protein kinase, DNA-activated, catalytic subunit) is up regulated in GC and has possible as a new diagnostic and prognostic biomarker, and therapeutic target. Down regulated hub genes such as SOX2 [340], EEF1A2 [341], ANG (angiogenin) [342], PTGDR2 [343], ERBB4 [344], KCNE2 [345], CA9 [346] and PSCA (prostate stem cell antigen) [347] were linked with pathogenesis of GC. Down regulated hub genes such as RIPK4 [348] and FAM3B [349] were involved in invasion of cells of many cancer types, but this gene may be associated with invasion of GC cells. Our investigation established that CNTD1, DCAF12L1, TTC39A, DUSP19, PTPRR (protein tyrosine phosphatase receptor type R) and TFR2 are down regulated in GC and has possible as a new diagnostic and prognostic biomarker, and therapeutic target.

The target genes - miRNA regulatory network analysis found that DEGs were considered as up and down regulated target genes in the network. Up regulated target genes such MYB (MYB proto-oncogene, transcription factor) [350] and SALL4 [351] were responsible for pathogenesis of GC. High expression of CLDN4 was key for progression of pancreatic cancer [352], but elevated expression this gene may be liable for progression of GC. Our investigation established that ARHGAP39 is up regulated in GC and has possible as a new diagnostic and prognostic biomarker, and therapeutic target. Down regulated target genes such as GATA6 [353] and KLF2 [354] were linked with development of GC. GLUL (glutamate-ammonia ligase) was involved in invasion of glioma cells [355], but this gene may be associated with invasion of GC cells. Our investigation established that ENPP5 is down regulated in GC and has possible as a new diagnostic and prognostic biomarker, and therapeutic target.

The target genes - TF regulatory network analysis found that DEGs were considered as up and down regulated target genes in the network. ABCA13 was responsible for advancement of GC [356]. Up regulated target gene ABCD1 was associated with invasion of renal cancer cells [357], but this gene may be liable for



invasion of GC cells. Down regulated target genes DNER (delta/notch like EGF repeat containing) [358] and IRX3 [359] were key for proliferation of many types of cancer cells, but these genes may be involved in proliferation of GC cells. CKB (creatine kinase B) was linked with progression of GC [360]. Down regulated target gene PKIB (cAMP-dependent protein kinase inhibitor beta) was important for invasion of breast cancer cells [361], but this gene may be linked with invasion of GC cells.

In our investigation, we screened FN1, PLK1, ANLN, MCM7, MCM2, EEF1A2, PTGER3, CKB, ERBB4 and PRKAA2 as important hub genes of GC by integrated bioinformatics analysis. Internal validation (survival analysis, expression analysis, stage analysis, mutation analysis, immuno infiltration analysis, immuno histochemical analysis and ROC analysis) and external validation (RT-PCR) of RNA and protein levels showed that they were higher or lower in cancerous than in normal control tissues. Over expression of the five hub genes and lower expression of the five hub genes were also associated with an advanced clinical stage and poor overall survival rate. Thus, the important hub genes explored in our investigation are likely to become a group of probable therapeutic targets of GC.

In conclusion, the current investigation identified important hub genes linked with the various clinical stage and overall survival of GC patients. Our investigation attempts a profound perspective of the molecular pathogenesis linked with the advancement of GC and implements probable biomarkers for early prognosis, diagnosis and individualized treatment of patients at various stages of GC.

## **Acknowledgement**

I thank Seon-Kyu Kim, Korea Research Institute of Bioscience & Biotechnology, Personalized Genomic Medicine Research Center, Daejeon, South Korea, very much, the author who deposited their microarray dataset, GSE113255, into the public GEO database.

## **Conflict of interest**



The authors declare that they have no conflict of interest.

### **Ethical approval**

This article does not contain any studies with human participants or animals performed by any of the authors.

### **Informed consent**

No informed consent because this study does not contain human or animals participants.

### **Author Contributions**

Basavaraj Vastrad was associated with methodology and review and editing. Ali Chanabasayya Vastrad was performed software, supervision, formal analysis and validation.

### **Availability of data and materials**

The datasets supporting the conclusions of this article are available in the GEO (Gene Expression Omnibus) (<https://www.ncbi.nlm.nih.gov/geo/>) repository. [(GSE113255) (<https://www.ncbi.nlm.nih.gov/geo/query/acc.cgi?acc=GSE113255>)]

### **Consent for publication**

Not applicable.

### **Competing interests**

The authors declare that they have no competing interests.

### **Authors**

Basavaraj Vastrtsad ORCID ID: [0000-0003-2202-7637](https://orcid.org/0000-0003-2202-7637)

Chanabasayya Vastrtsad ORCID ID: [0000-0003-3615-4450](https://orcid.org/0000-0003-3615-4450)

### **References**

1. Ang TL, Fock KM. Clinical epidemiology of gastric cancer. Singapore Med J. 2014;55(12):621–628. doi:[10.11622/smedj.2014174](https://doi.org/10.11622/smedj.2014174)

2. Rawla P, Barsouk A. Epidemiology of gastric cancer: global trends, risk factors and prevention. *Prz Gastroenterol.* 2019;14(1):26–38. doi:[10.5114/pg.2018.80001](https://doi.org/10.5114/pg.2018.80001)
3. Saka M, Katai H, Fukagawa T, Nijjar R, Sano T. Recurrence in early gastric cancer with lymph node metastasis. *Gastric Cancer.* 2008;11(4):214–218. doi:[10.1007/s10120-008-0485-4](https://doi.org/10.1007/s10120-008-0485-4)
4. Jin X, Guan Y, Zhang Z, Wang H. Microarray data analysis on gene and miRNA expression to identify biomarkers in non-small cell lung cancer. *BMC Cancer.* 2020;20(1):329. doi:[10.1186/s12885-020-06829-x](https://doi.org/10.1186/s12885-020-06829-x)
5. Kim JH, Shin HS, Lee SH, Lee I, Lee YS, Park JC, Kim YJ, Chung JB, Lee YC. Contrasting activity of Hedgehog and Wnt pathways according to gastric cancer cell differentiation: relevance of crosstalk mechanisms. *Cancer Sci.* 2010;101(2):328–335. doi:[10.1111/j.1349-7006.2009.01395.x](https://doi.org/10.1111/j.1349-7006.2009.01395.x)
6. Huang KH, Sung I, Fang WL, Chi CW, Yeh TS, Lee HC, Yin PH, Li AF, Wu CW, Shyr YM et al. Correlation between HGF/c-Met and Notch1 signaling pathways in human gastric cancer cells. *Oncol Rep.* 2018;40(1):294–302. doi:[10.3892/or.2018.6447](https://doi.org/10.3892/or.2018.6447)
7. Pai R, Lin C, Tran T, Tarnawski A. Leptin activates STAT and ERK2 pathways and induces gastric cancer cell proliferation. *Biochem Biophys Res Commun.* 2005;331(4):984–992. doi:[10.1016/j.bbrc.2005.03.236](https://doi.org/10.1016/j.bbrc.2005.03.236)
8. Peng L, Ran YL, Hu H, Yu L, Liu Q, Zhou Z, Sun YM, Sun LC, Pan J, Sun LX, et al. Secreted LOXL2 is a novel therapeutic target that promotes gastric cancer metastasis via the Src/FAK pathway. *Carcinogenesis.* 2009;30(10):1660–1669. doi:[10.1093/carcin/bgp178](https://doi.org/10.1093/carcin/bgp178)
9. Lee JY, Kim HY, Kim KH, Kim SM, Jang MK, Park JY, Lee JH, Kim JH, Yoo JY. Association of polymorphism of IL-10 and TNF-A genes with gastric cancer in Korea. *Cancer Lett.* 2005;225(2):207–214. doi:[10.1016/j.canlet.2004.11.028](https://doi.org/10.1016/j.canlet.2004.11.028)
10. Renault B, Calistri D, Buonsanti G, Nanni O, Amadori D, Ranzani GN. Microsatellite instability and mutations of p53 and TGF-beta RII genes in gastric cancer. *Hum Genet.* 1996;98(5):601–607. doi:[10.1007/s004390050267](https://doi.org/10.1007/s004390050267)
11. Shibata T, Tahara T, Hirata I, Arisawa T. Genetic polymorphism of interleukin-17A and -17F genes in gastric carcinogenesis. *Hum Immunol.* 2009;70(7):547–551. doi:[10.1016/j.humimm.2009.04.030](https://doi.org/10.1016/j.humimm.2009.04.030)

12. Bobarykina AY, Minchenko DO, Opentanova IL, Moenner M, Caro J, Esumi H, Minchenko OH. Hypoxic regulation of PFKFB-3 and PFKFB-4 gene expression in gastric and pancreatic cancer cell lines and expression of PFKFB genes in gastric cancers. *Acta Biochim Pol.* 2006;53(4):789–799.
13. Hu SL, Huang DB, Sun YB, Wu L, Xu WP, Yin S, Chen J, Jiang XD, Shen G. Pathobiologic implications of methylation and expression status of Runx3 and CHFR genes in gastric cancer. *Med Oncol.* 2011;28(2):447–454. doi:[10.1007/s12032-010-9467-6](https://doi.org/10.1007/s12032-010-9467-6)
14. Barrett T, Wilhite SE, Ledoux P, Evangelista C, Kim IF, Tomashevsky M, Marshall KA, Phillippy KH, Sherman PM, Holko M et al. NCBI GEO: archive for functional genomics data sets--update. *Nucleic Acids Res.* 2013;41(Database issue):D991–D995. doi:[10.1093/nar/gks1193](https://doi.org/10.1093/nar/gks1193)
15. Kolesnikov N, Hastings E, Keays M, Melnichuk O, Tang YA, Williams E, Dylag M, Kurbatova N, Brandizi M, Burdett T et al. ArrayExpress update--simplifying data submissions. *Nucleic Acids Res.* 2015;43(Database issue):D1113–D1116. doi:[10.1093/nar/gku1057](https://doi.org/10.1093/nar/gku1057)
16. Rau A, Flister M, Rui H, Auer PL. Exploring drivers of gene expression in the Cancer Genome Atlas. *Bioinformatics.* 2019;35(1):62–68. doi:[10.1093/bioinformatics/bty551](https://doi.org/10.1093/bioinformatics/bty551)
17. Kim SK, Kim HJ, Park JL, Heo H, Kim SY, Lee SI, Song KS, Kim WH, Kim YS. Identification of a molecular signature of prognostic subtypes in diffuse-type gastric cancer. *Gastric Cancer.* 2020;23(3):473–482. doi:[10.1007/s10120-019-01029-4](https://doi.org/10.1007/s10120-019-01029-4)
18. Lu X, Li Y, Li X, Aisa HA. Luteolin induces apoptosis in vitro through suppressing the MAPK and PI3K signaling pathways in gastric cancer. *Oncol Lett.* 2017;14(2):1993–2000. doi:[10.3892/ol.2017.6380](https://doi.org/10.3892/ol.2017.6380)
19. Hansen KD, Irizarry RA, Wu Z. Removing technical variability in RNA-seq data using conditional quantile normalization. *Biostatistics.* 2012;13(2):204–216. doi:[10.1093/biostatistics/kxr054](https://doi.org/10.1093/biostatistics/kxr054)
20. Ritchie ME, Phipson B, Wu DI, Hu Y, Law CW, Shi W, Smyth GK. limma powers differential expression analyses for RNA-sequencing and microarray studies. *Nucleic Acids Res.* 2015;43(7):e47. doi:[10.1093/nar/gkv007](https://doi.org/10.1093/nar/gkv007)
21. Caspi R, Billington R, Ferrer L, Foerster H, Fulcher CA, Keseler IM, Kothari A, Krummenacker M, Latendresse M, Mueller LA et al. The MetaCyc database of metabolic pathways and enzymes and the BioCyc

- collection of pathway/genome databases. *Nucleic Acids Res.* 2016;44(D1):D471–D480. doi:[10.1093/nar/gkv1164](https://doi.org/10.1093/nar/gkv1164)
22. Kanehisa M, Sato Y, Furumichi M, Morishima K, Tanabe M. New approach for understanding genome variations in KEGG. *Nucleic Acids Res.* 2019;47(D1):D590–D595. doi:[10.1093/nar/gky962](https://doi.org/10.1093/nar/gky962)
23. Schaefer CF, Anthony K, Krupa S, Buchoff J, Day M, Hannay T, Buetow KH. PID: the Pathway Interaction Database. *Nucleic Acids Res.* 2009;37(Database issue):D674–D679. doi:[10.1093/nar/gkn653](https://doi.org/10.1093/nar/gkn653)
24. Fabregat A, Jupe S, Matthews L, Sidiropoulos K, Gillespie M, Garapati P, Haw R, Jassal B, Korninger F, May B et al The Reactome Pathway Knowledgebase. *Nucleic Acids Res.* 2018;46(D1):D649–D655. doi:[10.1093/nar/gkx1132](https://doi.org/10.1093/nar/gkx1132)
25. Dahlquist KD, Salomonis N, Vranizan K, Lawlor SC, Conklin BR. GenMAPP, a new tool for viewing and analyzing microarray data on biological pathways. *Nat Genet.* 2002;31(1):19–20. doi:[10.1038/ng0502-19](https://doi.org/10.1038/ng0502-19)
26. Subramanian A, Tamayo P, Mootha VK, Mukherjee S, Ebert BL, Gillette MA, Paulovich A, Pomeroy SL, Golub TR, Lander ES et al Gene set enrichment analysis: a knowledge-based approach for interpreting genome-wide expression profiles. *Proc Natl Acad Sci U S A.* 2005;102(43):15545–15550. doi:[10.1073/pnas.0506580102](https://doi.org/10.1073/pnas.0506580102)
27. Mi H, Huang X, Muruganujan A, Tang H, Mills C, Kang D, Thomas PD. PANTHER version 11: expanded annotation data from Gene Ontology and Reactome pathways, and data analysis tool enhancements. *Nucleic Acids Res.* 2017;45(D1):D183–D189. doi:[10.1093/nar/gkw1138](https://doi.org/10.1093/nar/gkw1138)
28. Petri V, Jayaraman P, Tutaj M, Hayman GT, Smith JR, De Pons J, Lauderkind SJ, Lowry TF, Nigam R, Wang SJ et al The pathway ontology - updates and applications. *J Biomed Semantics.* 2014;5(1):7. doi:[10.1186/2041-1480-5-7](https://doi.org/10.1186/2041-1480-5-7)
29. Jewison T, Su Y, Disfany FM, Liang Y, Knox C, Maciejewski A, Poelzer J, Huynh J, Zhou Y, Arndt D et al SMPDB 2.0: big improvements to the Small Molecule Pathway Database. *Nucleic Acids Res.* 2014;42(Database issue):D478–D484. doi:[10.1093/nar/gkt1067](https://doi.org/10.1093/nar/gkt1067)
30. Chen J, Bardes EE, Aronow BJ, Jegga AG. ToppGene Suite for gene list enrichment analysis and candidate gene prioritization. *Nucleic Acids Res.* 2009;37(Web Server issue):W305–W311. doi:[10.1093/nar/gkp427](https://doi.org/10.1093/nar/gkp427)

31. Lewis SE. The Vision and Challenges of the Gene Ontology. *Methods Mol Biol.* 2017;1446:291–302. doi:[10.1007/978-1-4939-3743-1\\_21](https://doi.org/10.1007/978-1-4939-3743-1_21)
32. Alanis-Lobato G, Andrade-Navarro MA, Schaefer MH. HIPPIE v2.0: enhancing meaningfulness and reliability of protein-protein interaction networks. *Nucleic Acids Res* 2017;45(D1):D408-D414. doi:[10.1093/nar/gkw985](https://doi.org/10.1093/nar/gkw985)
33. Orchard S, Ammari M, Aranda B, Breuza L, Briganti L, Broackes-Carter F, Campbell NH, Chavali G, Chen C, del-Toro N, et al. The MIntAct project--IntAct as a common curation platform for 11 molecular interaction databases. *Nucleic Acids Res* 2014;42(Database issue):D358-D363. doi:[10.1093/nar/gkt1115](https://doi.org/10.1093/nar/gkt1115)
34. Chatr-Aryamontri A, Oughtred R, Boucher L, Rust J, Chang C, Kolas NK, O'Donnell L, Oster S, Theesfeld C, Sellam A, et al. The BioGRID interaction database: 2017 update. *Nucleic Acids Res* 2017;45(D1):D369-D379. doi:[10.1093/nar/gkw1102](https://doi.org/10.1093/nar/gkw1102)
35. Keshava Prasad TS, Goel R, Kandasamy K, Keerthikumar S, Kumar S, Mathivanan S, Telikicherla D, Raju R, Shafreen B, Venugopal A, et al. Human Protein Reference Database--2009 update. *Nucleic Acids Res* 2009;37(Database issue):D767-D772. doi:[10.1093/nar/gkn892](https://doi.org/10.1093/nar/gkn892)
36. Licata L, Briganti L, Peluso D, Perfetto L, Iannuccelli M, Galeota E, Sacco F, Palma A, Nardozza AP, Santonico E, et al. MINT, the molecular interaction database: 2012 update. *Nucleic Acids Res* 2012;40(Database issue):D857-D861. doi:[10.1093/nar/gkr930](https://doi.org/10.1093/nar/gkr930)
37. Isserlin R, El-Badrawi RA, Bader GD. The Biomolecular Interaction Network Database in PSI-MI 2.5. *Database (Oxford)*. 2011;2011:baq037. doi:[10.1093/database/baq037](https://doi.org/10.1093/database/baq037)
38. Pagel P, Kovac S, Oesterheld M, Brauner B, Dunger-Kaltenbach I, Frishman G, Montrone C, Mark P, Stümpflen V, Mewes HW, et al. The MIPS mammalian protein-protein interaction database. *Bioinformatics*. 2005;21(6):832-834. doi:[10.1093/bioinformatics/bti115](https://doi.org/10.1093/bioinformatics/bti115)
39. Salwinski L, Miller CS, Smith AJ, Pettit FK, Bowie JU, Eisenberg D. The Database of Interacting Proteins: 2004 update. *Nucleic Acids Res.* 2004;32(Database issue):D449-D451. doi:[10.1093/nar/gkh086](https://doi.org/10.1093/nar/gkh086)
40. Shannon P, Markiel A, Ozier O, Baliga NS, Wang JT, Ramage D, Amin N, Schwikowski B, Ideker T. Cytoscape: a software environment for

- integrated models of biomolecular interaction networks. *Genome Res* 2003;13(11):2498-2504. doi:[10.1101/gr.1239303](https://doi.org/10.1101/gr.1239303)
41. Przulj N, Wigle DA, Jurisica I. Functional topology in a network of protein interactions. *Bioinformatics*. 2004;20(3):340–348. doi:[10.1093/bioinformatics/btg415](https://doi.org/10.1093/bioinformatics/btg415)
42. Nguyen TP, Liu WC, Jordán F. Inferring pleiotropy by network analysis: linked diseases in the human PPI network. *BMC Syst Biol*. 2011;5:179. Published 2011 Oct 31. doi:[10.1186/1752-0509-5-179](https://doi.org/10.1186/1752-0509-5-179)
43. Shi Z, Zhang B. Fast network centrality analysis using GPUs. *BMC Bioinformatics*. 2011;12:149. doi:[10.1186/1471-2105-12-149](https://doi.org/10.1186/1471-2105-12-149)
44. Nguyen TP, Liu WC, Jordán F. Inferring pleiotropy by network analysis: linked diseases in the human PPI network. *BMC Syst Biol*. 2011;5:179. doi:[10.1186/1752-0509-5-179](https://doi.org/10.1186/1752-0509-5-179)
45. Wang J, Li M, Wang H, Pan Y. Identification of essential proteins based on edge clustering coefficient. *IEEE/ACM Trans Comput Biol Bioinform*. 2012;9(4):1070–1080. doi:[10.1109/TCBB.2011.147](https://doi.org/10.1109/TCBB.2011.147)
46. Zaki N, Efimov D, Berenguères J. Protein complex detection using interaction reliability assessment and weighted clustering coefficient. *BMC Bioinformatics*. 2013;14:163. doi:[10.1186/1471-2105-14-163](https://doi.org/10.1186/1471-2105-14-163)
47. Fan Y, Xia J miRNet-Functional Analysis and Visual Exploration of miRNA-Target Interactions in a Network Context. *Methods Mol Biol*. 2018;1819:215-233. doi:[10.1007/978-1-4939-8618-7\\_10](https://doi.org/10.1007/978-1-4939-8618-7_10)
48. Vlachos IS, Paraskevopoulou MD, Karagkouni D, Georgakilas G, Vergoulis T, Kanellos I, Anastasopoulos IL, Maniou S, Karathanou K, Kalfakakou D et al DIANA-TarBase v7.0: indexing more than half a million experimentally supported miRNA:mRNA interactions. *Nucleic Acids Res*. 2015;43(Database issue):D153-D159. doi:[10.1093/nar/gku1215](https://doi.org/10.1093/nar/gku1215)
49. Chou CH, Shrestha S, Yang CD, Chang NW, Lin YL, Liao KW, Huang WC, Sun TH, Tu SJ, Lee WH et al miRTarBase update 2018: a resource for experimentally validated microRNA-target interactions. *Nucleic Acids Res*. 2018;46(D1):D296-D302. doi:[10.1093/nar/gkx1067](https://doi.org/10.1093/nar/gkx1067)
50. Xiao F, Zuo Z, Cai G, Kang S, Gao X, Li T. miRecords: an integrated resource for microRNA-target interactions. *Nucleic Acids Res*. 2009;37(Database issue):D105-D110. doi:[10.1093/nar/gkn851](https://doi.org/10.1093/nar/gkn851)



51. Jiang Q, Wang Y, Hao Y, Juan L, Teng M, Zhang X, Li M, Wang G, Liu Y. miR2Disease: a manually curated database for microRNA deregulation in human disease. *Nucleic Acids Res.* 2009;37(Database issue):D98-104. doi:[10.1093/nar/gkn714](https://doi.org/10.1093/nar/gkn714)
52. Huang Z, Shi J, Gao Y, Cui C, Zhang S, Li J, Zhou Y, Cui Q. HMDD v3.0: a database for experimentally supported human microRNA-disease associations. *Nucleic Acids Res.* 2019;47(D1):D1013-D1017. doi:[10.1093/nar/gky1010Z](https://doi.org/10.1093/nar/gky1010Z)
53. Ruepp A, Kowarsch A, Schmidl D, Buggenthin F, Brauner B, Dunger I, Fobo G, Frishman G, Montrone C, Theis FJ. PhenomiR: a knowledgebase for microRNA expression in diseases and biological processes. *Genome Biol.* 2010;11(1):R6. doi:[10.1186/gb-2010-11-1-r6](https://doi.org/10.1186/gb-2010-11-1-r6)
54. Liu X, Wang S, Meng F, Wang J, Zhang Y, Dai E, Yu X, Li X, Jiang W. SM2miR: a database of the experimentally validated small molecules' effects on microRNA expression. *Bioinformatics.* 2013;29(3):409-411. doi:[10.1093/bioinformatics/bts698](https://doi.org/10.1093/bioinformatics/bts698)
55. Rukov JL, Wilentzik R, Jaffe I, Vinther J, Shomron N. PharmacomiR: linking microRNAs and drug effects. *Brief Bioinform.* 2014;15(4):648-659. doi:[10.1093/bib/bbs082](https://doi.org/10.1093/bib/bbs082)
56. Dai E, Yu X, Zhang Y, Meng F, Wang S, Liu X, Liu D, Wang J, Li X, Jiang W. EpimiR: a database of curated mutual regulation between miRNAs and epigenetic modifications. *Database (Oxford).* 2014;2014:bau023. doi:[10.1093/database/bau023](https://doi.org/10.1093/database/bau023)
57. Li JH, Liu S, Zhou H, Qu LH, Yang JH. starBase v2.0: decoding miRNA-ceRNA, miRNA-ncRNA and protein-RNA interaction networks from large-scale CLIP-Seq data. *Nucleic Acids Res.* 2014;42(Database issue):D92-D97. doi:[10.1093/nar/gkt1248](https://doi.org/10.1093/nar/gkt1248)
58. Zhou G, Soufan O, Ewald J, Hancock REW, Basu N, Xia J. NetworkAnalyst 3.0: a visual analytics platform for comprehensive gene expression profiling and meta-analysis. *Nucleic Acids Res.* 2019. doi:[10.1093/nar/gkz240](https://doi.org/10.1093/nar/gkz240)
59. Lachmann A, Xu H, Krishnan J, Berger SI, Mazloom AR, Ma'ayan A. ChEA: transcription factor regulation inferred from integrating genome-wide ChIP-X experiments. *Bioinformatics.* 2010;26(19):2438-2444. doi:[10.1093/bioinformatics/btq466](https://doi.org/10.1093/bioinformatics/btq466).

60. Chandrashekar DS, Bashel B, Balasubramanya SAH, Creighton CJ, Ponce-Rodriguez I, Chakravarthi BVSK, Varambally S. UALCAN: A Portal for Facilitating Tumor Subgroup Gene Expression and Survival Analyses. *Neoplasia*. 2017;19(8):649-658. doi:[10.1016/j.neo.2017.05.002](https://doi.org/10.1016/j.neo.2017.05.002)
61. Gao J, Aksoy BA, Dogrusoz U, Dresdner G, Gross B, Sumer SO, Sun Y, Jacobsen A, Sinha R, Larsson E et al Integrative analysis of complex cancer genomics and clinical profiles using the cBioPortal. *Sci Signal*. 2013;6(269):pl1. doi:[10.1126/scisignal.2004088](https://doi.org/10.1126/scisignal.2004088)
62. Uhlen M, Oksvold P, Fagerberg L, Lundberg E, Jonasson K, Forsberg M, Zwahlen M, Kampf C, Wester K, Hober S et al. Towards a knowledge-based Human Protein Atlas. *Nat Biotechnol*. 2010;28(12):1248-1250. doi:[10.1038/nbt1210-1248](https://doi.org/10.1038/nbt1210-1248)
63. Robin X, Turck N, Hainard A, Tiberti N, Lisacek F, Sanchez JC, Müller M. (2011) pROC: an open-source package for R and S+ to analyze and compare ROC curves. *BMC Bioinformatics* 12:77. doi:[10.1186/1471-2105-12-77](https://doi.org/10.1186/1471-2105-12-77)
64. Livak KJ, Schmittgen TD. Analysis of relative gene expression data using real-time quantitative PCR and the 2<sup>-</sup>(-Delta Delta C(T)) Method. *Methods*. 2001;25(4):402–408. doi:[10.1006/meth.2001.1262](https://doi.org/10.1006/meth.2001.1262)
65. Li T, Fan J, Wang B, Traugh N, Chen Q, Liu JS, Li B, Liu XS. TIMER: A Web Server for Comprehensive Analysis of Tumor-Infiltrating Immune Cells. *Cancer Res*. 2017;77(21):e108–e110. doi:[10.1158/0008-5472.CAN-17-0307](https://doi.org/10.1158/0008-5472.CAN-17-0307)
66. Li DF, Wang NN, Chang X, Wang SL, Wang LS, Yao J, Li ZS, Bai Y. Bioinformatics analysis suggests that COL4A1 may play an important role in gastric carcinoma recurrence. *J Dig Dis*. 2019;20(8):391–400. doi:[10.1111/1751-2980.12758](https://doi.org/10.1111/1751-2980.12758)
67. Katayama Y, Oshima T, Sakamaki K, Aoyama T, Sato T, Masudo K, Shiozawa M, Yoshikawa T, Rino Y, Imada T et al. Clinical Significance of INHBA Gene Expression in Patients with Gastric Cancer who Receive Curative Resection Followed by Adjuvant S-1 Chemotherapy. *In Vivo*. 2017;31(4):565–571. doi:[10.21873/invivo.11095](https://doi.org/10.21873/invivo.11095)
68. Matsuo M, Nakada C, Tsukamoto Y, Noguchi T, Uchida T, Hijiya N, Matsuura K, Moriyama M. MiR-29c is downregulated in gastric carcinomas and regulates cell proliferation by targeting RCC2. *Mol Cancer*. 2013;12:15. doi:[10.1186/1476-4598-12-15](https://doi.org/10.1186/1476-4598-12-15)

69. Wu K, Zou J, Lin C, Jie ZG. MicroRNA-140-5p inhibits cell proliferation, migration and promotes cell apoptosis in gastric cancer through the negative regulation of THY1-mediated Notch signaling. *Biosci Rep.* 2019;39(7):BSR20181434. doi:[10.1042/BSR20181434](https://doi.org/10.1042/BSR20181434)
70. Duell EJ, Sala N, Travier N, Muñoz X, Boutron-Ruault MC, Clavel-Chapelon F, Barricarte A, Arriola L, Navarro C, Sánchez-Cantalejo E et al. Genetic variation in alcohol dehydrogenase (ADH1A, ADH1B, ADH1C, ADH7) and aldehyde dehydrogenase (ALDH2), alcohol consumption and gastric cancer risk in the European Prospective Investigation into Cancer and Nutrition (EPIC) cohort. *Carcinogenesis.* 2012;33(2):361–367. doi:[10.1093/carcin/bgr285](https://doi.org/10.1093/carcin/bgr285)
71. Cao D, Zhao D, Jia Z, Su T, Zhang Y, Wu Y, Wu M, Tsukamoto T, Oshima M, Jiang J et al. Reactivation of Atp4a concomitant with intragenic DNA demethylation for cancer inhibition in a gastric cancer model. *Life Sci.* 2020;242:117214. doi:[10.1016/j.lfs.2019.117214](https://doi.org/10.1016/j.lfs.2019.117214)
72. Choi B, Han TS, Min J, Hur K, Lee SM, Lee HJ, Kim YJ, Yang HK. MAL and TMEM220 are novel DNA methylation markers in human gastric cancer. *Biomarkers.* 2017;22(1):35–44. doi:[10.1080/1354750X.2016.1201542](https://doi.org/10.1080/1354750X.2016.1201542)
73. Lin S, Lin B, Wang X, Pan Y, Xu Q, He JS, Gong W, Xing R, He Y, Guo L, et al. Silencing of ATP4B of ATPase H<sup>+</sup>/K<sup>+</sup> Transporting Beta Subunit by Intragenic Epigenetic Alteration in Human Gastric Cancer Cells. *Oncol Res.* 2017;25(3):317–329. doi:[10.3727/096504016X14734735156265](https://doi.org/10.3727/096504016X14734735156265)
74. Beuten J, Gelfond JA, Franke JL, Shook S, Johnson-Pais TL, Thompson IM, Leach RJ. Single and multivariate associations of MSR1, ELAC2, and RNASEL with prostate cancer in an ethnic diverse cohort of men. *Cancer Epidemiol Biomarkers Prev.* 2010;19(2):588–599. doi:[10.1158/1055-9965.EPI-09-0864](https://doi.org/10.1158/1055-9965.EPI-09-0864)
75. Kazmi HR, Chandra A, Baghel K, Singh A, Nigam J, Parmar D, Mahdi AA, Goel SK, Kumar S. Differential expression of cholecystokinin A receptor in gallbladder cancer in the young and elderly suggests two subsets of the same disease?. *Biomed Res Int.* 2014;2014:625695. doi:[10.1155/2014/625695](https://doi.org/10.1155/2014/625695)
76. Huang L, Liu S, Lei Y, Wang K, Xu M, Chen Y, Liu B, Chen Y, Fu Q, Zhang P, et al. Systemic immune-inflammation index, thymidine phosphorylase and survival of localized gastric cancer patients after curative

- resection. *Oncotarget*. 2016;7(28):44185–44193. doi:[10.18632/oncotarget.9923](https://doi.org/10.18632/oncotarget.9923)
77. Shi Y, Duan Z, Zhang X, Zhang X, Wang G, Li F. Down-regulation of the let-7i facilitates gastric cancer invasion and metastasis by targeting COL1A1. *Protein Cell*. 2019;10(2):143–148. doi:[10.1007/s13238-018-0550-7](https://doi.org/10.1007/s13238-018-0550-7)
78. Ao R, Guan L, Wang Y, Wang JN. Silencing of COL1A2, COL6A3, and THBS2 inhibits gastric cancer cell proliferation, migration, and invasion while promoting apoptosis through the PI3k-Akt signaling pathway. *J Cell Biochem*. 2018;119(6):4420–4434. doi:[10.1002/jcb.26524](https://doi.org/10.1002/jcb.26524)
79. Sun X, Zhang X, Zhai H, Zhang D, Ma S. A circular RNA derived from COL6A3 functions as a ceRNA in gastric cancer development. *Biochem Biophys Res Commun*. 2019;515(1):16–23. doi:[10.1016/j.bbrc.2019.05.079](https://doi.org/10.1016/j.bbrc.2019.05.079)
80. Jiang K, Liu H, Xie D, Xiao Q. Differentially expressed genes ASPN, COL1A1, FN1, VCAN and MUC5AC are potential prognostic biomarkers for gastric cancer. *Oncol Lett*. 2019;17(3):3191–3202. doi:[10.3892/ol.2019.9952](https://doi.org/10.3892/ol.2019.9952)
81. Song SZ, Lin S, Liu JN, Zhang MB, Du YT, Zhang DD, Xu WH, Wang HB. Targeting of SPP1 by microRNA-340 inhibits gastric cancer cell epithelial-mesenchymal transition through inhibition of the PI3K/AKT signaling pathway. *J Cell Physiol*. 2019;234(10):18587–18601. doi:[10.1002/jcp.28497](https://doi.org/10.1002/jcp.28497)
82. Zhang XB, Song L, Wen HJ, Bai XX, Li ZJ, Ma LJ. Upregulation of microRNA-31 targeting integrin  $\alpha 5$  suppresses tumor cell invasion and metastasis by indirectly regulating PI3K/AKT pathway in human gastric cancer SGC7901 cells. *Tumour Biol*. 2016;37(6):8317–8325. doi:[10.1007/s13277-015-4511-y](https://doi.org/10.1007/s13277-015-4511-y)
83. Hong BB, Chen SQ, Qi YL, Zhu JW, Lin JY. Association of THBS1 rs1478605 T>C in 5'-untranslated regions with the development and progression of gastric cancer. *Biomed Rep*. 2015;3(2):207–214. doi:[10.3892/br.2015.414](https://doi.org/10.3892/br.2015.414)
84. Chen X, Huang Y, Wang Y, Wu Q, Hong S, Huang Z. THBS4 predicts poor outcomes and promotes proliferation and metastasis in gastric cancer. *J Physiol Biochem*. 2019;75(1):117–123. doi:[10.1007/s13105-019-00665-9](https://doi.org/10.1007/s13105-019-00665-9)
85. Kang MH, Oh SC, Lee HJ, Kang HN, Kim JL, Kim JS, Yoo YA. Metastatic function of BMP-2 in gastric cancer cells: the role of PI3K/AKT, MAPK,

- the NF- $\kappa$ B pathway, and MMP-9 expression. *Exp Cell Res.* 2011;317(12):1746–1762. doi:[10.1016/j.yexcr.2011.04.006](https://doi.org/10.1016/j.yexcr.2011.04.006)
86. Shimura T, Dagher A, Sachdev M, Ebi M, Yamada T, Yamada T, Joh T, Moses MA. Urinary ADAM12 and MMP-9/NGAL complex detect the presence of gastric cancer. *Cancer Prev Res (Phila)*. 2015;8(3):240–248. doi:[10.1158/1940-6207.CAPR-14-0229](https://doi.org/10.1158/1940-6207.CAPR-14-0229)
87. Yao LW, Wu LL, Zhang LH, Zhou W, Wu L, He K, Ren JC, Deng YC, Yang DM, Wang J et al. MFAP2 is overexpressed in gastric cancer and promotes motility via the MFAP2/integrin  $\alpha 5\beta 1$ /FAK/ERK pathway. *Oncogenesis*. 2020;9(2):17. doi:[10.1038/s41389-020-0198-z](https://doi.org/10.1038/s41389-020-0198-z)
88. Yang D, Zhao D, Chen X. MiR-133b inhibits proliferation and invasion of gastric cancer cells by up-regulating FBN1 expression. *Cancer Biomark*. 2017;19(4):425–436. doi:[10.3233/CBM-160421](https://doi.org/10.3233/CBM-160421)
89. Holmberg C, Ghesquière B, Impens F, Gevaert K, Kumar JD, Cash N, Kandola S, Hegyi P, Wang TC, Dockray GJ et al. Mapping proteolytic processing in the secretome of gastric cancer-associated myofibroblasts reveals activation of MMP-1, MMP-2, and MMP-3. *J Proteome Res*. 2013;12(7):3413–3422. doi:[10.1021/pr400270q](https://doi.org/10.1021/pr400270q)
90. Dey S, Stalin S, Gupta A, Saha D, Kesh K, Swarnakar S. Matrix metalloproteinase3 gene promoter polymorphisms and their haplotypes are associated with gastric cancer risk in eastern Indian population. *Mol Carcinog*. 2012;51 Suppl 1:E42–E53. doi:[10.1002/mc.21837](https://doi.org/10.1002/mc.21837)
91. Liu G, Jiang C, Li D, Wang R, Wang W. MiRNA-34a inhibits EGFR-signaling-dependent MMP7 activation in gastric cancer. *Tumour Biol*. 2014;35(10):9801–9806. doi:[10.1007/s13277-014-2273-6](https://doi.org/10.1007/s13277-014-2273-6)
92. Xu G, Zhang B, Ye J, Cao S, Shi J, Zhao Y, Wang Y, Sang J, Yao Y, Guan W et al. Exosomal miRNA-139 in cancer-associated fibroblasts inhibits gastric cancer progression by repressing MMP11 expression. *Int J Biol Sci*. 2019;15(11):2320–2329. doi:[10.7150/ijbs.33750](https://doi.org/10.7150/ijbs.33750)
93. Zheng L, Chen Y, Ye L, Jiao W, Song H, Mei H, Li D, Yang F, Li H, Huang K et al. miRNA-584-3p inhibits gastric cancer progression by repressing Yin Yang 1- facilitated MMP-14 expression. *Sci Rep*. 2017;7(1):8967. doi:[10.1038/s41598-017-09271-5](https://doi.org/10.1038/s41598-017-09271-5)
94. Cao L, Chen C, Zhu H, Gu X, Deng D, Tian X, Liu J, Xiao Q. MMP16 is a marker of poor prognosis in gastric cancer promoting proliferation and



- invasion. *Oncotarget*. 2016;7(32):51865–51874. doi:[10.18632/oncotarget.10177](https://doi.org/10.18632/oncotarget.10177)
95. Yu ZH, Wang YM, Jiang YZ, Ma SJ, Zhong Q, Wan YY, Wang XW.. NID2 can serve as a potential prognosis prediction biomarker and promotes the invasion and migration of gastric cancer. *Pathol Res Pract*. 2019;215(10):152553. doi:[10.1016/j.prp.2019.152553](https://doi.org/10.1016/j.prp.2019.152553)
96. Li T, Huang H, Shi G, Zhao L, Li T, Zhang Z, Liu R, Hu Y, Liu H, Yu J, et al. TGF- $\beta$ 1-SOX9 axis-inducible COL10A1 promotes invasion and metastasis in gastric cancer via epithelial-to-mesenchymal transition. *Cell Death Dis*. 2018;9(9):849. doi:[10.1038/s41419-018-0877-2](https://doi.org/10.1038/s41419-018-0877-2)
97. Li A, Li J, Lin J, Zhuo W, Si J. COL11A1 is overexpressed in gastric cancer tissues and regulates proliferation, migration and invasion of HGC-27 gastric cancer cells in vitro. *Oncol Rep*. 2017;37(1):333–340. doi:[10.3892/or.2016.5276](https://doi.org/10.3892/or.2016.5276)
98. Jiang X, Wu M, Xu X, Zhang L, Huang Y, Xu Z, He K, Wang H, Wang H, Teng L. COL12A1, a novel potential prognostic factor and therapeutic target in gastric cancer. *Mol Med Rep*. 2019;20(4):3103–3112. doi:[10.3892/mmr.2019.10548](https://doi.org/10.3892/mmr.2019.10548)
99. Jiang C, Zhou Y, Huang Y, Wang Y, Wang W, Kuai X. Overexpression of ADAMTS-2 in tumor cells and stroma is predictive of poor clinical prognosis in gastric cancer. *Hum Pathol*. 2019;84:44–51. doi:[10.1016/j.humpath.2018.08.030](https://doi.org/10.1016/j.humpath.2018.08.030)
100. Dong Z, Fu S, Xu X, Yang Y, Du L, Li W, Kan S, Li Z, Zhang X, Wang L et al. Leptin-mediated regulation of ICAM-1 is Rho/ROCK dependent and enhances gastric cancer cell migration. *Br J Cancer*. 2014;110(7):1801–1810. doi:[10.1038/bjc.2014.70](https://doi.org/10.1038/bjc.2014.70)
101. Jiang K, Liu H, Xie D, Xiao Q. Differentially expressed genes ASPN, COL1A1, FN1, VCAN and MUC5AC are potential prognostic biomarkers for gastric cancer. *Oncol Lett*. 2019;17(3):3191–3202. doi:[10.3892/ol.2019.9952](https://doi.org/10.3892/ol.2019.9952)
102. Ren G, Tian Q, An Y, Feng B, Lu Y, Liang J, Li K, Shang Y, Nie Y, Wang X et al. Coronin 3 promotes gastric cancer metastasis via the up-regulation of MMP-9 and cathepsin K. *Mol Cancer*. 2012;11:67. doi:[10.1186/1476-4598-11-67](https://doi.org/10.1186/1476-4598-11-67)



103. Wu H, Ma S, Xiang M, Tong S. HTRA1 promotes transdifferentiation of normal fibroblasts to cancer-associated fibroblasts through activation of the NF- $\kappa$ B/bFGF signaling pathway in gastric cancer. *Biochem Biophys Res Commun.* 2019;514(3):933–939. doi:[10.1016/j.bbrc.2019.05.076](https://doi.org/10.1016/j.bbrc.2019.05.076)
104. Song H, Liu L, Song Z, Ren Y, Li C, Huo J. P4HA3 is Epigenetically Activated by Slug in Gastric Cancer and its Deregulation is Associated With Enhanced Metastasis and Poor Survival. *Technol Cancer Res Treat.* 2018;17:1533033818796485. doi:[10.1177/1533033818796485](https://doi.org/10.1177/1533033818796485)
105. Hu L, Duan YT, Li JF, Su LP, Yan M, Zhu ZG, Liu BY, Yang QM. Biglycan enhances gastric cancer invasion by activating FAK signaling pathway. *Oncotarget.* 2014;5(7):1885–1896. doi:[10.18632/oncotarget.1871](https://doi.org/10.18632/oncotarget.1871)
106. Hsieh YY, Tung SY, Pan HY, Yen CW, Xu HW, Deng YF, Lin YJ, Hsu WT, Wu CS, Li C. Upregulation of bone morphogenetic protein 1 is associated with poor prognosis of late-stage gastric Cancer patients. *BMC Cancer.* 2018;18(1):508. doi:[10.1186/s12885-018-4383-9](https://doi.org/10.1186/s12885-018-4383-9)
107. Cao B, Liu C, Yang G. Down-regulation of lncRNA ADAMTS9-AS2 contributes to gastric cancer development via activation of PI3K/Akt pathway. *Biomed Pharmacother.* 2018;107:185–193. doi:[10.1016/j.biopha.2018.06.146](https://doi.org/10.1016/j.biopha.2018.06.146)
108. Kawagoe K, Wada M, Idichi T, Okada R, Yamada Y, Moriya S, Okubo K, Matsushita D, Arigami T, Kurahara H et al. Regulation of aberrantly expressed SERPINH1 by antitumor miR-148a-5p inhibits cancer cell aggressiveness in gastric cancer. *J Hum Genet.* 2020;10.1038/s10038-020-0746-6. doi:[10.1038/s10038-020-0746-6](https://doi.org/10.1038/s10038-020-0746-6)
109. Cai QW, Li J, Li XQ, Wang JQ, Huang Y. Expression of STAT3, MMP-1 and TIMP-1 in gastric cancer and correlation with pathological features. *Mol Med Rep.* 2012;5(6):1438–1442. doi:[10.3892/mmr.2012.849](https://doi.org/10.3892/mmr.2012.849)
110. Kasashima H, Yashiro M, Kinoshita H, Fukuoka T, Morisaki T, Masuda G, Sakurai K, Kubo N, Ohira M, Hirakawa K. Lysyl oxidase-like 2 (LOXL2) from stromal fibroblasts stimulates the progression of gastric cancer. *Cancer Lett.* 2014;354(2):438–446. doi:[10.1016/j.canlet.2014.08.014](https://doi.org/10.1016/j.canlet.2014.08.014)
111. Liao P, Li W, Liu R, Teer JK, Xu B, Zhang W, Li X, Mcleod HL, He Y. Genome-scale analysis identifies SERPINE1 and SPARC as diagnostic and prognostic biomarkers in gastric cancer. *Onco Targets Ther.* 2018;11:6969–6980. doi:[10.2147/OTT.S173934](https://doi.org/10.2147/OTT.S173934)

112. Wang J, Liang WJ, Min GT, Wang HP, Chen W, Yao N. LTBP2 promotes the migration and invasion of gastric cancer cells and predicts poor outcome of patients with gastric cancer. *Int J Oncol*. 2018;52(6):1886–1898. doi:[10.3892/ijo.2018.4356](https://doi.org/10.3892/ijo.2018.4356)
113. Chen L, Zhang Y, Zuo Y, Ma F, Song H. Lumican expression in gastric cancer and its association with biological behavior and prognosis. *Oncol Lett*. 2017;14(5):5235–5240. doi:[10.3892/ol.2017.6842](https://doi.org/10.3892/ol.2017.6842)
114. Wang Q, Shi M, Sun S, Zhou Q, Ding L, Jiang C, Bian T, Jia F, Liu Y, Qin J. CLEC5A promotes the proliferation of gastric cancer cells by activating the PI3K/AKT/mTOR pathway. *Biochem Biophys Res Commun*. 2020;524(3):656–662. doi:[10.1016/j.bbrc.2019.10.122](https://doi.org/10.1016/j.bbrc.2019.10.122)
115. Andreuzzi E, Capuano A, Pellicani R, Poletto E, Doliana R, Maiero S, Fornasarig M, Magris R, Colombatti A, Cannizzaro R, et al. Loss of Multimerin-2 and EMILIN-2 Expression in Gastric Cancer Associate with Altered Angiogenesis. *Int J Mol Sci*. 2018;19(12):3983. Published 2018 Dec 11. doi:[10.3390/ijms19123983](https://doi.org/10.3390/ijms19123983)
116. Lei KF, Liu BY, Wang YF, Chen XH, Yu BQ, Guo Y, Zhu ZG. SerpinB5 interacts with KHDRBS3 and FBXO32 in gastric cancer cells. *Oncol Rep*. 2011;26(5):1115–1120. doi:[10.3892/or.2011.1369](https://doi.org/10.3892/or.2011.1369)
117. Wang K, Wang B, Xing AY, Xu KS, Li GX, Yu ZH. Prognostic significance of SERPINE2 in gastric cancer and its biological function in SGC7901 cells. *J Cancer Res Clin Oncol*. 2015;141(5):805–812. doi:[10.1007/s00432-014-1858-1](https://doi.org/10.1007/s00432-014-1858-1)
118. Wang M, Chen L, Chen Y, Wei R, Guo Q, Zhu S, Guo S, Zhu S, Zhang S, Min L. Intracellular matrix Gla protein promotes tumor progression by activating JAK2/STAT5 signaling in gastric. *Mol Oncol*. 2020;10.1002/1878-0261.12652. doi:[10.1002/1878-0261.12652](https://doi.org/10.1002/1878-0261.12652)
119. Liu JY, Jiang L, Liu JJ, He T, Cui YH, Qian F, Yu PW. AEBP1 promotes epithelial-mesenchymal transition of gastric cancer cells by activating the NF- $\kappa$ B pathway and predicts poor outcome of the patients. *Sci Rep*. 2018;8(1):11955. doi:[10.1038/s41598-018-29878-6](https://doi.org/10.1038/s41598-018-29878-6)
120. Lu H, Feng Y, Hu Y, Guo Y, Liu Y, Mao Q, Xue W. Spondin 2 promotes the proliferation, migration and invasion of gastric cancer cells. *J Cell Mol Med*. 2020;24(1):98–113. doi:[10.1111/jcmm.14618](https://doi.org/10.1111/jcmm.14618)

121. Shibata T, Tahara T, Arisawa T, Hirata I. Polymorphism of the salt sensitivity gene angiotensinogen and gastric cancer risk. *Mol Med Rep.* 2011;4(4):723–726. doi:[10.3892/mmr.2011.495](https://doi.org/10.3892/mmr.2011.495)
122. Zhang C, Li Z, Xu L, Che X, Wen T, Fan Y, Li C, Wang S, Cheng Y, Wang X et al. CXCL9/10/11, a regulator of PD-L1 expression in gastric cancer. *BMC Cancer.* 2018;18(1):462. doi:[10.1186/s12885-018-4384-8](https://doi.org/10.1186/s12885-018-4384-8)
123. Yu J, Feng J, Zhi X, Tang J, Li Z, Xu Y, Yang L, Hu Z, Xu Z. Let-7b inhibits cell proliferation, migration, and invasion through targeting Cthrc1 in gastric cancer. *Tumour Biol.* 2015;36(5):3221–3229. doi:[10.1007/s13277-014-2950-5](https://doi.org/10.1007/s13277-014-2950-5)
124. He S, Wang L, Wu Y, Li D, Zhang Y. CCL3 and CCL20-recruited dendritic cells modified by melanoma antigen gene-1 induce anti-tumor immunity against gastric cancer ex vivo and in vivo. *J Exp Clin Cancer Res.* 2010;29(1):37. doi:[10.1186/1756-9966-29-37](https://doi.org/10.1186/1756-9966-29-37)
125. Wu CY, Wu MS, Chen YJ, Chen HP, Chen CJ, Chang CS, Lin JT. Clinicopathological significance of urokinase-type plasminogen activator genotypes in gastric cancer. *Hepatogastroenterology.* 2008;55(86-87):1890–1894.
126. Qu HX, Cui L, Meng XY, Wang ZJ, Cui YX, Yu YP, Wang D, Jiang XJ. C1QTNF6 is overexpressed in gastric carcinoma and contributes to the proliferation and migration of gastric carcinoma cells. *Int J Mol Med.* 2019;43(1):621–629. doi:[10.3892/ijmm.2018.3978](https://doi.org/10.3892/ijmm.2018.3978)
127. Hou X, Zhang Y, Qiao H. CCL18 promotes the invasion and migration of gastric cancer cells via ERK1/2/NF- $\kappa$ B signaling pathway. *Tumour Biol.* 2016;37(1):641–651. doi:[10.1007/s13277-015-3825-0](https://doi.org/10.1007/s13277-015-3825-0)
128. Yamamoto Y, Kuroda K, Sera T, Sugimoto A, Kushiyaama S, Nishimura S, Togano S, Okuno T, Yoshii M, Tamura T, et al. The Clinicopathological Significance of the CXCR2 Ligands, CXCL1, CXCL2, CXCL3, CXCL5, CXCL6, CXCL7, and CXCL8 in Gastric Cancer. *Anticancer Res.* 2019;39(12):6645–6652. doi:[10.21873/anticancer.13879](https://doi.org/10.21873/anticancer.13879)
129. Wang H, Duan XL, Qi XL, Meng L, Xu YS, Wu T, Dai PG. Concurrent Hypermethylation of SFRP2 and DKK2 Activates the Wnt/ $\beta$ -Catenin Pathway and Is Associated with Poor Prognosis in Patients with Gastric Cancer. *Mol Cells.* 2017;40(1):45–53. doi:[10.14348/molcells.2017.2245](https://doi.org/10.14348/molcells.2017.2245)

130. Chen Z, Zhu S, Hong J, Soutto M, Peng D, Belkhiri A, Xu Z, El-Rifai W. Gastric tumour-derived ANGPT2 regulation by DARPP-32 promotes angiogenesis. *Gut*. 2016;65(6):925–934. doi:[10.1136/gutjnl-2014-308416](https://doi.org/10.1136/gutjnl-2014-308416)
131. Han M, Dai D, Yousafzai NA, Wang F, Wang H, Zhou Q, Lu H, Xu W, Feng L, Jin H et al. CXXC4 activates apoptosis through up-regulating GDF15 in gastric cancer. *Oncotarget*. 2017;8(61):103557–103567. doi:[10.18632/oncotarget.21581](https://doi.org/10.18632/oncotarget.21581)
132. Zhang Z, Wang J, Dong X. Wnt2 contributes to the progression of gastric cancer by promoting cell migration and invasion. *Oncol Lett*. 2018;16(3):2857–2864. doi:[10.3892/ol.2018.9050](https://doi.org/10.3892/ol.2018.9050)
133. Kim J, Kim WH, Byeon SJ, Lee BL, Kim MA. Epigenetic Downregulation and Growth Inhibition of IGFBP7 in Gastric Cancer. *Asian Pac J Cancer Prev*. 2018;19(3):667–675. Published 2018 Mar 27. doi:[10.22034/APJCP.2018.19.3.667](https://doi.org/10.22034/APJCP.2018.19.3.667)
134. Wu X, Tao P, Zhou Q, Li J, Yu Z, Wang X, Li J, Li C, Yan M, Zhu Z, et al. IL-6 secreted by cancer-associated fibroblasts promotes epithelial-mesenchymal transition and metastasis of gastric cancer via JAK2/STAT3 signaling pathway. *Oncotarget*. 2017;8(13):20741–20750. doi:[10.18632/oncotarget.15119](https://doi.org/10.18632/oncotarget.15119)
135. Ma J, Song X, Xu X, Mou Y. Cancer-Associated Fibroblasts Promote the Chemo-resistance in Gastric Cancer through Secreting IL-11 Targeting JAK/STAT3/Bcl2 Pathway. *Cancer Res Treat*. 2019;51(1):194–210. doi:[10.4143/crt.2018.031](https://doi.org/10.4143/crt.2018.031)
136. Chen D, Zhou H, Liu G, Zhao Y, Cao G, Liu Q. SPOCK1 promotes the invasion and metastasis of gastric cancer through Slug-induced epithelial-mesenchymal transition. *J Cell Mol Med*. 2018;22(2):797–807. doi:[10.1111/jcmm.13357](https://doi.org/10.1111/jcmm.13357)
137. Liu YP, Chen WD, Li WN, Zhang M. Overexpression of FNDC1 Relates to Poor Prognosis and Its Knockdown Impairs Cell Invasion and Migration in Gastric Cancer. *Technol Cancer Res Treat*. 2019;18:1533033819869928. doi:[10.1177/1533033819869928](https://doi.org/10.1177/1533033819869928)
138. Yamada T, Oshima T, Yoshihara K, Sato T, Nozaki A, Shiozawa M, Ota M, Yoshikawa T, Akaike M, Numata K, et al. Impact of overexpression of Sushi repeat-containing protein X-linked 2 gene on outcomes of gastric cancer. *J Surg Oncol*. 2014;109(8):836–840. doi:[10.1002/jso.23602](https://doi.org/10.1002/jso.23602)

139. Wang L, Xie L, Wang J, Shen J, Liu B. Correlation between the methylation of SULF2 and WRN promoter and the irinotecan chemosensitivity in gastric cancer. *BMC Gastroenterol.* 2013;13:173. doi:[10.1186/1471-230X-13-173](https://doi.org/10.1186/1471-230X-13-173)
140. Hur K, Han TS, Jung EJ, Yu J, Lee HJ, Kim WH, Goel A, Yang HK. Up-regulated expression of sulfatases (SULF1 and SULF2) as prognostic and metastasis predictive markers in human gastric cancer. *J Pathol.* 2012;228(1):88–98. doi:[10.1002/path.4055](https://doi.org/10.1002/path.4055)
141. Zhang ZZ, Hua R, Zhang JF, Zhao WY, Zhao EH, Tu L, Wang CJ, Cao H, Zhang ZG. TEM7 (PLXDC1), a key prognostic predictor for resectable gastric cancer, promotes cancer cell migration and invasion. *Am J Cancer Res.* 2015;5(2):772–781.
142. Li X, Pasche B, Zhang W, Chen K. Association of MUC16 Mutation With Tumor Mutation Load and Outcomes in Patients With Gastric Cancer. *JAMA Oncol.* 2018;4(12):1691–1698. doi:[10.1001/jamaoncol.2018.2805](https://doi.org/10.1001/jamaoncol.2018.2805)
143. Lv Z, Fan Y, Chen H, Zhao D. Endothelial cell-specific molecule-1: a potential serum marker for gastric cancer. *Tumour Biol.* 2014;35(10):10497–10502. doi:[10.1007/s13277-014-2319-9](https://doi.org/10.1007/s13277-014-2319-9)
144. Shrestha S, Yang CD, Hong HC, Chou CH, Tai CS, Chiew MY, Chen WL, Weng SL, Chen CC, Chang YA et al. Integrated MicroRNA-mRNA Analysis Reveals miR-204 Inhibits Cell Proliferation in Gastric Cancer by Targeting CKS1B, CXCL1 and GPRC5A. *Int J Mol Sci.* 2017;19(1):87. doi:[10.3390/ijms19010087](https://doi.org/10.3390/ijms19010087)
145. Suzuki M, Yokobori T, Gombodorj N, Yashiro M, Turtoi A, Handa T, Ogata K, Oyama T, Shirabe K, Kuwano H. High stromal transforming growth factor  $\beta$ -induced expression is a novel marker of progression and poor prognosis in gastric cancer. *J Surg Oncol.* 2018;118(6):966–974. doi:[10.1002/jso.25217](https://doi.org/10.1002/jso.25217)
146. Yu Z, Li Z, Wang C, Pan T, Chang X, Wang X, Zhou Q, Wu X, Li J, Zhang J, et al. Oncostatin M receptor, positively regulated by SP1, promotes gastric cancer growth and metastasis upon treatment with Oncostatin M. *Gastric Cancer.* 2019;22(5):955–966. doi:[10.1007/s10120-019-00934-y](https://doi.org/10.1007/s10120-019-00934-y)
147. Sheng WZ, Chen YS, Tu CT, He J, Zhang B, Gao WD. ANGPTL2 expression in gastric cancer tissues and cells and its biological behavior.



- World J Gastroenterol. 2016;22(47):10364–10370. doi:[10.3748/wjg.v22.i47.10364](https://doi.org/10.3748/wjg.v22.i47.10364)
148. Peng X, Wang P, Li S, Jiang Y, Wu C. Follistatin-like protein 1 knockdown elicits human gastric cancer cell apoptosis via a STAT6-dependent pathway. *Oncol Rep.* 2019;42(6):2806–2813. doi:[10.3892/or.2019.7334](https://doi.org/10.3892/or.2019.7334)
149. Lee SH, Je EM, Yoo NJ, Lee SH. HMCN1, a cell polarity-related gene, is somatically mutated in gastric and colorectal cancers. *Pathol Oncol Res.* 2015;21(3):847–848. doi:[10.1007/s12253-014-9809-3](https://doi.org/10.1007/s12253-014-9809-3)
150. Chen J, Liu H, Chen J, Sun B, Wu J, Du C. PLXNC1 Enhances Carcinogenesis Through Transcriptional Activation of IL6ST in Gastric Cancer. *Front Oncol.* 2020;10:33. doi:[10.3389/fonc.2020.00033](https://doi.org/10.3389/fonc.2020.00033)
151. Sun Z, Cai S, Liu C, Cui Y, Ji J, Jiang WG, Ye L. Increased Expression of Gremlin1 Promotes Proliferation and Epithelial Mesenchymal Transition in Gastric Cancer Cells and Correlates With Poor Prognosis of Patients With Gastric Cancer. *Cancer Genomics Proteomics.* 2020;17(1):49–60. doi:[10.21873/cgp.20167](https://doi.org/10.21873/cgp.20167)
152. Li R, Zhuang C, Jiang S, Du N, Zhao W, Tu L, Cao H, Zhang Z, Chen X. ITGBL1 Predicts a Poor Prognosis and Correlates EMT Phenotype in Gastric Cancer. *J Cancer.* 2017;8(18):3764–3773. doi:[10.7150/jca.20900](https://doi.org/10.7150/jca.20900)
153. JingSong H, Hong G, Yang J, Duo Z, Li F, WeiCai C, XueYing L, YouSheng M, YiWen O, Yue P et al. siRNA-mediated suppression of collagen type iv alpha 2 (COL4A2) mRNA inhibits triple-negative breast cancer cell proliferation and migration. *Oncotarget.* 2017;8(2):2585–2593. doi:[10.18632/oncotarget.13716](https://doi.org/10.18632/oncotarget.13716)
154. Wu P, Wang Y, Wu Y, Jia Z, Song Y, Liang N. Expression and prognostic analyses of ITGA11, ITGB4 and ITGB8 in human non-small cell lung cancer. *PeerJ.* 2019;7:e8299. doi:[10.7717/peerj.8299](https://doi.org/10.7717/peerj.8299)
155. Gordon-Weeks A, Lim SY, Yuzhalin A, Lucotti S, Vermeer JA, Jones K, Chen J, Muschel RJ. Tumour-Derived Laminin  $\alpha 5$  (LAMA5) Promotes Colorectal Liver Metastasis Growth, Branching Angiogenesis and Notch Pathway Inhibition. *Cancers (Basel).* 2019;11(5):630. doi:[10.3390/cancers11050630](https://doi.org/10.3390/cancers11050630)
156. Meng XY, Shi MJ, Zeng ZH, Chen C, Liu TZ, Wu QJ, Li S, Li S. The Role of COL5A2 in Patients With Muscle-Invasive Bladder Cancer: A



- Bioinformatics Analysis of Public Datasets Involving 787 Subjects and 29 Cell Lines. *Front Oncol.* 2019;8:659. doi:[10.3389/fonc.2018.00659](https://doi.org/10.3389/fonc.2018.00659)
157. Chen J, Luo Y, Zhou Y, Qin S, Qiu Y, Cui R, Yu M, Qin J, Zhong M. Promotion of Tumor Growth by ADAMTS4 in Colorectal Cancer: Focused on Macrophages. *Cell Physiol Biochem.* 2018;46(4):1693–1703. doi:[10.1159/000489245](https://doi.org/10.1159/000489245)
158. Lin YM, Lin CW, Lu JW, Yeh KT, Lin SH, Yang SF. Decreased Cytoplasmic Expression of ADAMTS14 Is Correlated with Reduced Survival Rates in Oral Squamous Cell Carcinoma Patients. *Diagnostics (Basel).* 2020;10(2):122. Published 2020 Feb 23. doi:[10.3390/diagnostics10020122](https://doi.org/10.3390/diagnostics10020122)
159. Jiang G, Wang P, Wang W, Li W, Dai L, Chen K. Annexin A13 promotes tumor cell invasion in vitro and is associated with metastasis in human colorectal cancer. *Oncotarget.* 2017;8(13):21663–21673. doi:[10.18632/oncotarget.15523](https://doi.org/10.18632/oncotarget.15523)
160. Zhao M, Ding JX, Nie GY, Wei J, Li Y, Yin XY, Chen Q. HTRA3 is reduced in ovarian cancers regardless of stage. *Cancer Invest.* 2014;32(9):464–469. doi:[10.3109/07357907.2014.958496](https://doi.org/10.3109/07357907.2014.958496)
161. Wang D, Zhu T, Zhang FB, He C. Expression of ADAMTS12 in colorectal cancer-associated stroma prevents cancer development and is a good prognostic indicator of colorectal cancer. *Dig Dis Sci.* 2011;56(11):3281–3287. doi:[10.1007/s10620-011-1723-x](https://doi.org/10.1007/s10620-011-1723-x)
162. Liu TT, Liu XS, Zhang M, Liu XN, Zhu FX, Zhu FM, Ouyang SW, Li SB, Song CL, Sun HM et al Cartilage oligomeric matrix protein is a prognostic factor and biomarker of colon cancer and promotes cell proliferation by activating the Akt pathway. *J Cancer Res Clin Oncol.* 2018;144(6):1049–1063. doi:[10.1007/s00432-018-2626-4](https://doi.org/10.1007/s00432-018-2626-4)
163. Ni WD, Yang ZT, Cui CA, Cui Y, Fang LY, Xuan YH. Tenascin-C is a potential cancer-associated fibroblasts marker and predicts poor prognosis in prostate cancer. *Biochem Biophys Res Commun.* 2017;486(3):607–612. doi:[10.1016/j.bbrc.2017.03.021](https://doi.org/10.1016/j.bbrc.2017.03.021)
164. Wei CM, Zhao XF, Qiu HB, Ming Z, Liu K, Yan J. The long non-coding RNA PVT1/miR-145-5p/ITGB8 axis regulates cell proliferation, apoptosis, migration and invasion in non-small cell lung cancer cells. *Neoplasma.* 2020;190723N657. doi:[10.4149/neo\\_2020\\_190723N657](https://doi.org/10.4149/neo_2020_190723N657)

165. Gao L, Chen X, Wang Y, Zhang J. Up-Regulation of FSTL3, Regulated by lncRNA DSCAM-AS1/miR-122-5p Axis, Promotes Proliferation and Migration of Non-Small Cell Lung Cancer Cells. *Oncotargets Ther.* 2020;13:2725–2738. doi:[10.2147/OTT.S236359](https://doi.org/10.2147/OTT.S236359)
166. Wang WW, Zhao ZH, Wang L, Li P, Chen KS, Zhang JY, Li WC, Jiang GZ, Li XN. MicroRNA-134 prevents the progression of esophageal squamous cell carcinoma via the PLXNA1-mediated MAPK signalling pathway. *EBioMedicine.* 2019;46:66–78. doi:[10.1016/j.ebiom.2019.07.050](https://doi.org/10.1016/j.ebiom.2019.07.050)
167. Yuan L, Shu B, Chen L, Qian K, Wang Y, Qian G, Zhu Y, Cao X, Xie C, Xiao Y et al. Overexpression of COL3A1 confers a poor prognosis in human bladder cancer identified by co-expression analysis. *Oncotarget.* 2017;8(41):70508–70520. doi:[10.18632/oncotarget.19733](https://doi.org/10.18632/oncotarget.19733)
168. Wu M, Sun Q, Mo CH, Pang JS, Hou JY, Pang LL, Lu HP, Dang YW, Fang SJ, Tang D et al. Prospective molecular mechanism of COL5A1 in breast cancer based on a microarray, RNA sequencing and immunohistochemistry. *Oncol Rep.* 2019;42(1):151–175. doi:[10.3892/or.2019.7147](https://doi.org/10.3892/or.2019.7147)
169. Kita Y, Mimori K, Tanaka F, Matsumoto T, Haraguchi N, Ishikawa K, Matsuzaki S, Fukuyoshi Y, Inoue H, Natsugoe S et al. Clinical significance of LAMB3 and COL7A1 mRNA in esophageal squamous cell carcinoma. *Eur J Surg Oncol.* 2009;35(1):52–58. doi:[10.1016/j.ejso.2008.01.025](https://doi.org/10.1016/j.ejso.2008.01.025)
170. Shang J, Wang F, Chen P, Wang X, Ding F, Liu S, Zhao Q. Co-expression Network Analysis Identified COL8A1 Is Associated with the Progression and Prognosis in Human Colon Adenocarcinoma. *Dig Dis Sci.* 2018;63(5):1219–1228. doi:[10.1007/s10620-018-4996-5](https://doi.org/10.1007/s10620-018-4996-5)
171. Bengsch F, Buck A, Günther SC, Seiz JR, Tacke M, Pfeifer D, Von Elverfeldt D, Sevenich L, Hillebrand LE, Kern U et al. Cell type-dependent pathogenic functions of overexpressed human cathepsin B in murine breast cancer progression. *Oncogene.* 2014;33(36):4474–4484. doi:[10.1038/onc.2013.395](https://doi.org/10.1038/onc.2013.395)
172. Li J, Xu X, Jiang Y, Hansbro NG, Hansbro PM, Xu J, Liu G. Elastin is a key factor of tumor development in colorectal cancer. *BMC Cancer.* 2020;20(1):217. doi:[10.1186/s12885-020-6686-x](https://doi.org/10.1186/s12885-020-6686-x)

173. Tao J, Li H, Li Q, Yang Y. CD109 is a potential target for triple-negative breast cancer. *Tumour Biol.* 2014;35(12):12083–12090. doi:[10.1007/s13277-014-2509-5](https://doi.org/10.1007/s13277-014-2509-5)
174. Vycital O, Pitule P, Hosek P, Kriz T, Treska V, Liska V. Expression of Serpin B9 as a Prognostic Factor of Colorectal Cancer. *Anticancer Res.* 2019;39(11):6063–6066. doi:[10.21873/anticancer.13813](https://doi.org/10.21873/anticancer.13813)
175. Yu YP, Cai LC, Wang XY, Cheng SY, Zhang DM, Jian WG, Wang TD, Yang JK, Yang KB, Zhang C. BMP8A promotes survival and drug resistance via Nrf2/TRIM24 signaling pathway in clear cell renal cell carcinoma. *Cancer Sci.* 2020;10.1111/cas.14376. doi:[10.1111/cas.14376](https://doi.org/10.1111/cas.14376)
176. D'Apice L, Costa V, Valente C, Trovato M, Pagani A, Manera S, Regolo L, Zambelli A, Ciccodicola A, De Berardinis P. Analysis of SEMA6B gene expression in breast cancer: identification of a new isoform. *Biochim Biophys Acta.* 2013;1830(10):4543–4553. doi:[10.1016/j.bbagen.2013.05.003](https://doi.org/10.1016/j.bbagen.2013.05.003)
177. Wang GH, Yao L, Xu HW, Tang WT, Fu JH, Hu XF, Cui L, Xu XM. Identification of MXRA5 as a novel biomarker in colorectal cancer. *Oncol Lett.* 2013;5(2):544–548. doi:[10.3892/ol.2012.1038](https://doi.org/10.3892/ol.2012.1038)
178. Huang D, Yu B, Deng Y, Sheng W, Peng Z, Qin W, Du X. SFRP4 was overexpressed in colorectal carcinoma. *J Cancer Res Clin Oncol.* 2010;136(3):395–401. doi:[10.1007/s00432-009-0669-2](https://doi.org/10.1007/s00432-009-0669-2)
179. Sun J, Liu X, Gao H, Zhang L, Ji Q, Wang Z, Zhou L, Wang Y, Sui H, Fan Z et al. Overexpression of colorectal cancer oncogene CHRDL2 predicts a poor prognosis. *Oncotarget.* 2017;8(7):11489–11506. doi:[10.18632/oncotarget.14039](https://doi.org/10.18632/oncotarget.14039)
180. Dai DN, Li Y, Chen B, Du Y, Li SB, Lu SX, Zhao ZP, Zhou AJ, Xue N, Xia TL, Elevated expression of CST1 promotes breast cancer progression and predicts a poor prognosis. *J Mol Med (Berl).* 2017;95(8):873–886. doi:[10.1007/s00109-017-1537-1](https://doi.org/10.1007/s00109-017-1537-1) et al
181. Kuo SJ, Chien SY, Lin C, Chan SE, Tsai HT, Chen DR. Significant elevation of CLDN16 and HAPLN3 gene expression in human breast cancer. *Oncol Rep.* 2010;24(3):759–766. doi:[10.3892/or\\_00000918](https://doi.org/10.3892/or_00000918)
182. Dougan J, Hawsawi O, Burton LJ, Edwards G, Jones K, Zou J, Nagappan P, Wang G, Zhang Q, Danaher A, et al. Proteomics-Metabolomics Combined Approach Identifies Peroxidasin as a Protector against Metabolic

- and Oxidative Stress in Prostate Cancer. *Int J Mol Sci.* 2019;20(12):3046. doi:[10.3390/ijms20123046](https://doi.org/10.3390/ijms20123046)
183. Kang S, Oh SC, Min BW, Lee DH. Transglutaminase 2 Regulates Self-renewal and Stem Cell Marker of Human Colorectal Cancer Stem Cells. *Anticancer Res.* 2018;38(2):787–794. doi:[10.21873/anticancer.12285](https://doi.org/10.21873/anticancer.12285)
184. Lourenço GJ, Cardoso-Filho C, Gonçalves NS, Shinzato JY, Zeferino LC, Nascimento H, Costa FF, Gurgel MS, Lima CS. A high risk of occurrence of sporadic breast cancer in individuals with the 104NN polymorphism of the COL18A1 gene. *Breast Cancer Res Treat.* 2006;100(3):335–338. doi:[10.1007/s10549-006-9259-z](https://doi.org/10.1007/s10549-006-9259-z)
185. Liu H, Dong H, Robertson K, Liu C. DNA methylation suppresses expression of the urea cycle enzyme carbamoyl phosphate synthetase 1 (CPS1) in human hepatocellular carcinoma. *Am J Pathol.* 2011;178(2):652–661. doi:[10.1016/j.ajpath.2010.10.023](https://doi.org/10.1016/j.ajpath.2010.10.023)
186. Heindryckx F, Coulon S, Terrie E, Casteleyn C, Stassen JM, Geerts A, Libbrecht L, Allemeersch J, Carmeliet P, Colle I, et al. The placental growth factor as a target against hepatocellular carcinoma in a diethylnitrosamine-induced mouse model. *J Hepatol.* 2013;58(2):319–328. doi:[10.1016/j.jhep.2012.09.032](https://doi.org/10.1016/j.jhep.2012.09.032)
187. Frycz BA, Murawa D, Borejsza-Wysocki M, Wichtowski M, Spychała A, Marciniak R, Murawa P, Drews M, Jagodziński PP. Transcript level of AKR1C3 is down-regulated in gastric cancer. *Biochem Cell Biol.* 2016;94(2):138–146. doi:[10.1139/bcb-2015-0096](https://doi.org/10.1139/bcb-2015-0096)
188. Li C, Tian ZN, Cai JP, Chen KX, Zhang B, Feng MY, Shi QT, Li R, Qin Y, Geng JS. Panax ginseng polysaccharide induces apoptosis by targeting Twist/AKR1C2/NF-1 pathway in human gastric cancer. *Carbohydr Polym.* 2014;102:103–109. doi:[10.1016/j.carbpol.2013.11.016](https://doi.org/10.1016/j.carbpol.2013.11.016)
189. Hidaka A, Sasazuki S, Matsuo K, Ito H, Sawada N, Shimazu T, Yamaji T, Iwasaki M, Inoue M, Tsugane S et al. Genetic polymorphisms of ADH1B, ADH1C and ALDH2, alcohol consumption, and the risk of gastric cancer: the Japan Public Health Center-based prospective study. *Carcinogenesis.* 2015;36(2):223–231. doi:[10.1093/carcin/bgu244](https://doi.org/10.1093/carcin/bgu244)
190. Tamer L, Ercan B, Ercan S, Ateş N, Ateş C, Öcal K, Dirlik M, Aydin S, Atik U. CYP2C19 polymorphisms in patients with gastric and colorectal

- carcinoma. *Int J Gastrointest Cancer*. 2006;37(1):1–5. doi:[10.1385/IJGC:37:1:1](https://doi.org/10.1385/IJGC:37:1:1)
191. Gervasini G, García-Martín E, Ladero JM, Pizarro R, Sastre J, Martínez C, García M, Diaz-Rubio M, Agúndez JA. Genetic variability in CYP3A4 and CYP3A5 in primary liver, gastric and colorectal cancer patients. *BMC Cancer*. 2007;7:118. doi:[10.1186/1471-2407-7-118](https://doi.org/10.1186/1471-2407-7-118)
192. Nguyen TV, Janssen MJ, van Oijen MG, Bergevoet SM, Te Morsche RH, van Asten H, Laheij RJ, Peters WH, Jansen JB. Genetic polymorphisms in GSTA1, GSTP1, GSTT1, and GSTM1 and gastric cancer risk in a Vietnamese population. *Oncol Res*. 2010;18(7):349–355. doi:[10.3727/096504010x12626118080064](https://doi.org/10.3727/096504010x12626118080064)
193. Duan S, Gong B, Wang P, Huang H, Luo L, Liu F. Novel prognostic biomarkers of gastric cancer based on gene expression microarray: COL12A1, GSTA3, FGA and FGG. *Mol Med Rep*. 2018;18(4):3727–3736. doi:[10.3892/mmr.2018.9368](https://doi.org/10.3892/mmr.2018.9368)
194. Lin M, Pan J, Chen Q, Xu Z, Lin X, Shi C. Overexpression of FOXA1 inhibits cell proliferation and EMT of human gastric cancer AGS cells. *Gene*. 2018;642:145–151. doi:[10.1016/j.gene.2017.11.023](https://doi.org/10.1016/j.gene.2017.11.023)
195. Li C, Lu S, Shi Y. MicroRNA-187 promotes growth and metastasis of gastric cancer by inhibiting FOXA2. *Oncol Rep*. 2017;37(3):1747–1755. doi:[10.3892/or.2017.5370](https://doi.org/10.3892/or.2017.5370)
196. Shimura T, Shibata M, Gonda K, Okayama H, Saito M, Momma T, Ohki S, Kono K. Serum transthyretin level is associated with prognosis of patients with gastric cancer. *J Surg Res*. 2018;227:145–150. doi:[10.1016/j.jss.2018.02.035](https://doi.org/10.1016/j.jss.2018.02.035)
197. He J, Jin Y, Chen Y, Yao HB, Xia YJ, Ma YY, Wang W, Shao QS. Downregulation of ALDOB is associated with poor prognosis of patients with gastric cancer. *Onco Targets Ther*. 2016;9:6099–6109. doi:[10.2147/OTT.S110203](https://doi.org/10.2147/OTT.S110203)
198. Ma MZ, Yuan SQ, Chen YM, Zhou ZW. Preoperative apolipoprotein B/apolipoprotein A1 ratio: a novel prognostic factor for gastric cancer. *Onco Targets Ther*. 2018;11:2169–2176. doi:[10.2147/OTT.S156690](https://doi.org/10.2147/OTT.S156690)
199. Li XS, Xu Q, Fu XY, Luo WS. ALDH1A1 overexpression is associated with the progression and prognosis in gastric cancer. *BMC Cancer*. 2014;14:705. doi:[10.1186/1471-2407-14-705](https://doi.org/10.1186/1471-2407-14-705)



200. Li H, Wang J, Xu H, Xing R, Pan Y, Li W, Cui J, Zhang H, Lu Y. Decreased fructose-1,6-bisphosphatase-2 expression promotes glycolysis and growth in gastric cancer cells. *Mol Cancer*. 2013;12(1):110. doi:[10.1186/1476-4598-12-110](https://doi.org/10.1186/1476-4598-12-110)
201. Zhang Q, Hu H, Shi X, Tang W. Knockdown of S100P by lentiviral-mediated RNAi promotes apoptosis and suppresses the colony-formation ability of gastric cancer cells. *Oncol Rep*. 2014;31(5):2344–2350. doi:[10.3892/or.2014.3104](https://doi.org/10.3892/or.2014.3104)
202. Ji L, Qian W, Gui L, Ji Z, Yin P, Lin GN, Wang Y, Ma B, Gao WQ. Blockade of  $\beta$ -catenin-induced CCL28 suppresses gastric cancer progression via inhibition of Treg cell infiltration. *Cancer Res*. 2020;canres.3074.2019. doi:[10.1158/0008-5472.CAN-19-3074](https://doi.org/10.1158/0008-5472.CAN-19-3074)
203. Repetto O, Maiero S, Magris R, Miolo G, Cozzi MR, Steffan A, Canzonieri V, Cannizzaro R, De Re V. Quantitative Proteomic Approach Targeted to Fibrinogen  $\beta$  Chain in Tissue Gastric Carcinoma. *Int J Mol Sci*. 2018;19(3):759. doi:[10.3390/ijms19030759](https://doi.org/10.3390/ijms19030759)
204. Hur H, Yu EJ, Ham IH, Jin HJ, Lee D. Preoperative serum levels of insulin-like growth factor-binding protein 2 predict prognosis of gastric cancer patients. *Oncotarget*. 2017;8(7):10994–11003. doi:[10.18632/oncotarget.14202](https://doi.org/10.18632/oncotarget.14202)
205. Wang X, Zhong RY, Xiang XJ. Reduced expression of SCUBE2 predicts poor prognosis in gastric cancer patients. *Int J Clin Exp Pathol*. 2018;11(2):972–980.
206. Liu F, Zhang Y, Men T, Jiang X, Yang C, Li H, Wei X, Yan D, Feng G, Yang J, et al. Quantitative proteomic analysis of gastric cancer tissue reveals novel proteins in platelet-derived growth factor b signaling pathway. *Oncotarget*. 2017;8(13):22059–22075. doi:[10.18632/oncotarget.15908](https://doi.org/10.18632/oncotarget.15908)
207. Konno-Shimizu M, Yamamichi N, Inada KI, Kageyama-Yahara N, Shioyama K, Takahashi Y, Asada-Hirayama I, Yamamichi-Nishina M, Nakayama C, Ono S, Kodashima S. Cathepsin E is a marker of gastric differentiation and signet-ring cell carcinoma of stomach: a novel suggestion on gastric tumorigenesis. *PLoS One*. 2013;8(2):e56766. doi:[10.1371/journal.pone.0056766](https://doi.org/10.1371/journal.pone.0056766)



208. Saeki N, Sakamoto H, Yoshida T. Mucin 1 gene (MUC1) and gastric-cancer susceptibility. *Int J Mol Sci.* 2014;15(5):7958–7973. doi:[10.3390/ijms15057958](https://doi.org/10.3390/ijms15057958)
209. Kwon JA, Lee SY, Ahn EK, Seol SY, Kim MC, Kim SJ, Kim SI, Chu IS, Leem SH. Short rare MUC6 minisatellites-5 alleles influence susceptibility to gastric carcinoma by regulating gene. *Hum Mutat.* 2010;31(8):942–949. doi:[10.1002/humu.21289](https://doi.org/10.1002/humu.21289)
210. Bianconi D, Herac M, Spies D, Kieler M, Brettner R, Unseld M, Fürnkranz K, Famler B, Schmeidl M, Minichsdorfer C et al. SERPINB7 Expression Predicts Poor Pancreatic Cancer Survival Upon Gemcitabine Treatment. *Transl Oncol.* 2019;12(1):15–23. doi:[10.1016/j.tranon.2018.08.019](https://doi.org/10.1016/j.tranon.2018.08.019)
211. Nielsen TO, Friis-Hansen L, Poulsen SS, Federspiel B, Sorensen BS. Expression of the EGF family in gastric cancer: downregulation of HER4 and its activating ligand NRG4. *PLoS One.* 2014;9(4):e94606. doi:[10.1371/journal.pone.0094606](https://doi.org/10.1371/journal.pone.0094606)
212. Chen R, Zhuge X, Huang Z, Lu D, Ye X, Chen C, Yu J, Lu G. Analysis of SEMA3B methylation and expression patterns in gastric cancer tissue and cell lines. *Oncol Rep.* 2014;31(3):1211–1218. doi:[10.3892/or.2014.2972](https://doi.org/10.3892/or.2014.2972)
213. Perrais M, Pigny P, Buisine MP, Porchet N, Aubert JP, Van Seuningem-Lempire I. Aberrant expression of human mucin gene MUC5B in gastric carcinoma and cancer cells. Identification and regulation of a distal promoter. *J Biol Chem.* 2001;276(18):15386–15396. doi:[10.1074/jbc.M010534200](https://doi.org/10.1074/jbc.M010534200)
214. Ishikawa A, Sakamoto N, Honma R, Taniyama D, Fukada K, Hattori T, Sentani K, Oue N, Yanagihara K, Tanabe K, et al. Annexin A10 is involved in the induction of pancreatic duodenal homeobox 1 in gastric cancer tissue, cells and organoids. *Oncol Rep.* 2020;43(2):581–590. doi:[10.3892/or.2019.7422](https://doi.org/10.3892/or.2019.7422)
215. Qiu YS, Liao GJ, Jiang NN. REG3A overexpression suppresses gastric cancer cell invasion, proliferation and promotes apoptosis through PI3K/Akt signaling pathway. *Int J Mol Med.* 2018;41(6):3167–3174. doi:[10.3892/ijmm.2018.3520](https://doi.org/10.3892/ijmm.2018.3520)

216. Arisawa T, Tahara T, Ozaki K, Matsue Y, Minato T, Yamada H, Nomura T, Hayashi R, Matsunaga K, Fukumura A, et al. Association between common genetic variant of HRH2 and gastric cancer risk. *Int J Oncol.* 2012;41(2):497–503. doi:[10.3892/ijo.2012.1482](https://doi.org/10.3892/ijo.2012.1482)
217. Shi X, Li X, Chen L, Wang C. Analysis of somatostatin receptors and somatostatin promoter methylation in human gastric cancer. *Oncol Lett.* 2013;6(6):1794–1798. doi:[10.3892/ol.2013.1614](https://doi.org/10.3892/ol.2013.1614)
218. Rai R, Kim JJ, Tewari M, Shukla HS. Heterogeneous expression of cholecystokinin and gastrin receptor in stomach and pancreatic cancer: An immunohistochemical study. *J Cancer Res Ther.* 2016;12(1):411–416. doi:[10.4103/0973-1482.168970](https://doi.org/10.4103/0973-1482.168970)
219. Hong ZH, Chang LL, Fang-Jie YA, Yan HU, Chen-Ming ZE, Tian-Yi ZH, Tao YU, Mei-Dan YI, Ji CA, Qiao-Jun HE et al. AKR1C1 Activates STAT3 to Promote the Metastasis of Non-Small Cell Lung Cancer. *Theranostics.* 2018;8(3):676–692. doi:[10.7150/thno.21463](https://doi.org/10.7150/thno.21463)
220. Wu JB, Yin L, Shi C, Li Q, Duan P, Huang JM, Liu C, Wang F, Lewis M, Wang Y, et al. MAOA-Dependent Activation of Shh-IL6-RANKL Signaling Network Promotes Prostate Cancer Metastasis by Engaging Tumor-Stromal Cell Interactions. *Cancer Cell.* 2017;31(3):368–382. doi:[10.1016/j.ccell.2017.02.003](https://doi.org/10.1016/j.ccell.2017.02.003)
221. Counihan JL, Wiggenhorn AL, Anderson KE, Nomura DK. Chemoproteomics-Enabled Covalent Ligand Screening Reveals ALDH3A1 as a Lung Cancer Therapy Target. *ACS Chem Biol.* 2018;13(8):1970–1977. doi:[10.1021/acscchembio.8b00381](https://doi.org/10.1021/acscchembio.8b00381)
222. Oguri T, Takahashi T, Miyazaki M, Isobe T, Kohno N, Mackenzie PI, Fujiwara Y. UGT1A10 is responsible for SN-38 glucuronidation and its expression in human lung cancers. *Anticancer Res.* 2004;24(5A):2893–2896.
223. Yang C, Zhou Q, Li M, Tong X, Sun J, Qing Y, Sun L, Yang X, Hu X, Jiang J, et al. Upregulation of CYP2S1 by oxaliplatin is associated with p53 status in colorectal cancer cell lines. *Sci Rep.* 2016;6:33078. doi:[10.1038/srep33078](https://doi.org/10.1038/srep33078)
224. Lu YX, Ju HQ, Liu ZX, Chen DL, Wang Y, Zhao Q, Wu QN, Zeng ZL, Qiu HB, Hu PS, et al. ME1 Regulates NADPH Homeostasis to Promote

- Gastric Cancer Growth and Metastasis. *Cancer Res.* 2018;78(8):1972–1985. doi:[10.1158/0008-5472.CAN-17-3155](https://doi.org/10.1158/0008-5472.CAN-17-3155)
225. Yu J, Li J, Chen Y, Cao W, Lu Y, Yang J, Xing E. Snail Enhances Glycolysis in the Epithelial-Mesenchymal Transition Process by Targeting FBP1 in Gastric Cancer. *Cell Physiol Biochem.* 2017;43(1):31–38. doi:[10.1159/000480314](https://doi.org/10.1159/000480314)
226. Shimokawa Y, Okuda K, Kubo Y, Kaneko A, Arishima T, Nagata E, Hashimoto M, Sawa Y, Nagasaki Y, Kojiro M, et al. Serum glutamic oxalacetic transaminase/glutamic pyruvic transaminase ratios in hepatocellular carcinoma. *Cancer.* 1977;40(1):319–324. doi:[10.1002/1097-0142\(197707\)40:1<319::aid-cnrc2820400145>3.0.co;2-q](https://doi.org/10.1002/1097-0142(197707)40:1<319::aid-cnrc2820400145>3.0.co;2-q)
227. Ganapathi MK, Jones WD, Sehouli J, Michener CM, Braicu IE, Norris EJ, Biscotti CV, Vaziri SA, Ganapathi RN. Expression profile of COL2A1 and the pseudogene SLC6A10P predicts tumor recurrence in high-grade serous ovarian cancer. *Int J Cancer.* 2016;138(3):679–688. doi:[10.1002/ijc.29815](https://doi.org/10.1002/ijc.29815)
228. Yodsurang V, Tanikawa C, Miyamoto T, Lo PHY, Hirata M, Matsuda K. Identification of a novel p53 target, COL17A1, that inhibits breast cancer cell migration and invasion. *Oncotarget.* 2017;8(34):55790–55803. doi:[10.18632/oncotarget.18433](https://doi.org/10.18632/oncotarget.18433)
229. Tan JX, Wang XY, Li HY, Su XL, Wang L, Ran L, Zheng K, Ren GS. HYAL1 overexpression is correlated with the malignant behavior of human breast cancer. *Int J Cancer.* 2011;128(6):1303–1315. doi:[10.1002/ijc.25460](https://doi.org/10.1002/ijc.25460)
230. Ma Y, Chen Y, Li Y, Grün K, Berndt A, Zhou Z, Petersen I. Cystatin A suppresses tumor cell growth through inhibiting epithelial to mesenchymal transition in human lung cancer. *Oncotarget.* 2017;9(18):14084–14098. doi:[10.18632/oncotarget.23505](https://doi.org/10.18632/oncotarget.23505)
231. Nowakowska-Zajdel E, Mazurek U, Wierzgoń J, Kokot T, Fatyga E, Ziółko E, Klakla K, Błazelonis A, Waniczek D, Głogowski Ł, et al. Expression of ADAM28 and IGFBP-3 genes in patients with colorectal cancer - a preliminary report. *Int J Immunopathol Pharmacol.* 2013;26(1):223–228. doi:[10.1177/039463201302600122](https://doi.org/10.1177/039463201302600122)

232. Chen E, Li Q, Wang H, Zhang P, Zhao X, Yang F, Yang J. MiR-32 promotes tumorigenesis of colorectal cancer by targeting BMP5. *Biomed Pharmacother.* 2018;106:1046–1051. doi:[10.1016/j.biopha.2018.07.050](https://doi.org/10.1016/j.biopha.2018.07.050)
233. Koyama T, Ogawara K, Kasamatsu A, Okamoto A, Kasama H, Minakawa Y, Shimada K, Yokoe H, Shiiba M, Tanzawa H, et al. ANGPTL3 is a novel biomarker as it activates ERK/MAPK pathway in oral cancer. *Cancer Med.* 2015;4(5):759–769. doi:[10.1002/cam4.418](https://doi.org/10.1002/cam4.418)
234. Guo Y, Li H, Guan H, Ke W, Liang W, Xiao H, Li Y. Dermatopontin inhibits papillary thyroid cancer cell proliferation through MYC repression. *Mol Cell Endocrinol.* 2019;480:122–132. doi:[10.1016/j.mce.2018.10.021](https://doi.org/10.1016/j.mce.2018.10.021)
235. Lee RM, Hirano K, Anant S, Baunoch D, Davidson NO. An alternatively spliced form of apobec-1 messenger RNA is overexpressed in human colon cancer. *Gastroenterology.* 1998;115(5):1096–1103. doi:[10.1016/s0016-5085\(98\)70080-0](https://doi.org/10.1016/s0016-5085(98)70080-0)
236. Kua LF, Ross S, Lee SC, Mimura K, Kono K, Goh BC, Yong WP. UGT1A6 polymorphisms modulated lung cancer risk in a Chinese population. *PLoS One.* 2012;7(8):e42873. doi:[10.1371/journal.pone.0042873](https://doi.org/10.1371/journal.pone.0042873)
237. Alcazar-González GA, Calderón-Garcidueñas AL, Garza-Rodríguez ML, Rubio-Hernández G, Escorza-Treviño S, Olano-Martin E, Cerda-Flores RM, Castruita-Avila AL, González-Guerrero JF, Le Brun S, Simon-Buela L. Comparative study of polymorphism frequencies of the CYP2D6, CYP3A5, CYP2C8 and IL-10 genes in Mexican and Spanish women with breast cancer. *Pharmacogenomics.* 2013;14(13):1583–1592. doi:[10.2217/pgs.13.83](https://doi.org/10.2217/pgs.13.83)
238. Lim JS, Chen XA, Singh O, Yap YS, Ng RC, Wong NS, Wong M, Lee EJ, Chowbay B. Impact of CYP2D6, CYP3A5, CYP2C9 and CYP2C19 polymorphisms on tamoxifen pharmacokinetics in Asian breast cancer patients. *Br J Clin Pharmacol.* 2011;71(5):737–750. doi:[10.1111/j.1365-2125.2011.03905.x](https://doi.org/10.1111/j.1365-2125.2011.03905.x)
239. Silva SN, Azevedo AP, Teixeira V, Pina JE, Rueff J, Gaspar JF. The role of GSTA2 polymorphisms and haplotypes in breast cancer susceptibility: a case-control study in the Portuguese population. *Oncol Rep.* 2009;22(3):593–598. doi:[10.3892/or\\_00000477](https://doi.org/10.3892/or_00000477)
240. Wilborn TW, Lang NP, Smith M, Meleth S, Falany CN. Association of SULT2A1 allelic variants with plasma adrenal androgens and prostate

- cancer in African American men. *J Steroid Biochem Mol Biol.* 2006;99(4-5):209–214. doi:[10.1016/j.jsbmb.2006.01.006](https://doi.org/10.1016/j.jsbmb.2006.01.006)
241. Kadalayil L, Khan S, Nevanlinna H, Fasching PA, Couch FJ, Hopper JL, Liu J, Maishman T, Durcan L, Gerty S, et al. Germline variation in ADAMTSL1 is associated with prognosis following breast cancer treatment in young women. *Nat Commun.* 2017;8(1):1632. doi:[10.1038/s41467-017-01775-y](https://doi.org/10.1038/s41467-017-01775-y)
242. Sigurdson AJ, Brenner AV, Roach JA, Goudeva L, Müller JA, Nerlich K, Reiners C, Schwab R, Pfeiffer L, Waldenberger M, et al. Selected single-nucleotide polymorphisms in FOXE1, SERPINA5, FTO, EVPL, TICAM1 and SCARB1 are associated with papillary and follicular thyroid cancer risk: replication study in a German population. *Carcinogenesis.* 2016;37(7):677–684. doi:[10.1093/carcin/bgw047](https://doi.org/10.1093/carcin/bgw047)
243. Launonen V, Laake K, Huusko P, Niederacher D, Beckmann MW, Barkardottir RB, Geirsdottir EK, Gudmundsson J, Rio P, Bignon YJ et al. European multicenter study on LOH of APOC3 at 11q23 in 766 breast cancer patients: relation to clinical variables. Breast Cancer Somatic Genetics Consortium. *Br J Cancer.* 1999;80(5-6):879–882. doi:[10.1038/sj.bjc.6690435](https://doi.org/10.1038/sj.bjc.6690435)
244. Chow RK, Sin ST, Liu M, Li Y, Chan TH, Song Y, Chen L, Kwong DL, Guan XY. AKR7A3 suppresses tumorigenicity and chemoresistance in hepatocellular carcinoma through attenuation of ERK, c-Jun and NF-κB signaling pathways. *Oncotarget.* 2016;8(48):83469–83479. doi:[10.18632/oncotarget.12726](https://doi.org/10.18632/oncotarget.12726)
245. Li YJ, Huang TH, Hsiao M, Lin BR, Cheng SJ, Yang CN, Lai WT, Wu TS, Fan JR, Kuo MY, et al. Suppression of fructose-bisphosphate aldolase C expression as a predictor of advanced oral squamous cell carcinoma. *Head Neck.* 2016;38 Suppl 1:E1075–E1085. doi:[10.1002/hed.24161](https://doi.org/10.1002/hed.24161)
246. Sun HM, Mi YS, Yu FD, Han Y, Liu XS, Lu S, Zhang Y, Zhao SL, Ye L, Liu TT, et al. SERPINA4 is a novel independent prognostic indicator and a potential therapeutic target for colorectal cancer. *Am J Cancer Res.* 2016;6(8):1636–1649.
247. Molokwu CN, Adeniji OO, Chandrasekharan S, Hamdy FC, Buttle DJ. Androgen regulates ADAMTS15 gene expression in prostate cancer

- cells. *Cancer Invest.* 2010;28(7):698–710. doi:[10.3109/07357907.2010.489538](https://doi.org/10.3109/07357907.2010.489538)
248. Li P, Cong Z, Qiang Y, Xiong L, Tang L, Zhang Y, Wu H, Yi J, Jing H, Li D, et al. Clinical significance of CCBE1 expression in lung cancer. *Mol Med Rep.* 2018;17(2):2107–2112. doi:[10.3892/mmr.2017.8187](https://doi.org/10.3892/mmr.2017.8187)
249. Sun J, Xie T, Jamal M, Tu Z, Li X, Wu Y, Li J, Zhang Q, Huang X. CLEC3B as a potential diagnostic and prognostic biomarker in lung cancer and association with the immune microenvironment. *Cancer Cell Int.* 2020;20:106. doi:[10.1186/s12935-020-01183-1](https://doi.org/10.1186/s12935-020-01183-1)
250. Cao B, Yang Y, Pan Y, Jia Y, Brock MV, Herman JG, Guo M. Epigenetic silencing of CXCL14 induced colorectal cancer migration and invasion. *Discov Med.* 2013;16(88):137–147.
251. Lee BH, Taylor MG, Robinet P, Smith JD, Schweitzer J, Sehayek E, Falzarano SM, Magi-Galluzzi C, Klein EA, Ting AH. Dysregulation of cholesterol homeostasis in human prostate cancer through loss of ABCA1. *Cancer Res.* 2013;73(3):1211–1218. doi:[10.1158/0008-5472.CAN-12-3128](https://doi.org/10.1158/0008-5472.CAN-12-3128)
252. Bae H, Kim B, Lee H, Lee S, Kang HS, Kim SJ. Epigenetically regulated Fibronectin leucine rich transmembrane protein 2 (FLRT2) shows tumor suppressor activity in breast cancer cells. *Sci Rep.* 2017;7(1):272. doi:[10.1038/s41598-017-00424-0](https://doi.org/10.1038/s41598-017-00424-0)
253. Moelans CB, Verschuur-Maes AH, van Diest PJ. Frequent promoter hypermethylation of BRCA2, CDH13, MSH6, PAX5, PAX6 and WT1 in ductal carcinoma in situ and invasive breast cancer. *J Pathol.* 2011;225(2):222–231. doi:[10.1002/path.2930](https://doi.org/10.1002/path.2930)
254. Dong R, Guo J, Zhang Z, Zhou Y, Hua Y. Polyphyllin I inhibits gastric cancer cell proliferation by downregulating the expression of fibroblast activation protein alpha (FAP) and hepatocyte growth factor (HGF) in cancer-associated fibroblasts. *Biochem Biophys Res Commun.* 2018;497(4):1129–1134. doi:[10.1016/j.bbrc.2018.02.193](https://doi.org/10.1016/j.bbrc.2018.02.193)
255. Sotoudeh M, Shirvani SI, Merat S, Ahmadbeigi N, Naderi M. MSLN (Mesothelin), ANTXR1 (TEM8), and MUC3A are the potent antigenic targets for CAR T cell therapy of gastric adenocarcinoma. *J Cell Biochem.* 2019;120(4):5010–5017. doi:[10.1002/jcb.27776](https://doi.org/10.1002/jcb.27776)



256. Xu Y, Shao QS, Yao HB, Jin Y, Ma YY, Jia LH. Overexpression of FOXC1 correlates with poor prognosis in gastric cancer patients. *Histopathology*. 2014;64(7):963–970. doi:[10.1111/his.12347](https://doi.org/10.1111/his.12347)
257. Liu J, Liu Z, Zhang X, Gong T, Yao D. Bioinformatic exploration of OLFML2B overexpression in gastric cancer base on multiple analyzing tools. *BMC Cancer*. 2019;19(1):227. doi:[10.1186/s12885-019-5406-x](https://doi.org/10.1186/s12885-019-5406-x)
258. Yi J, Ren L, Wu J, Li W, Zheng X, Du G, Wang J. Apolipoprotein C1 (APOC1) as a novel diagnostic and prognostic biomarker for gastric cancer. *Ann Transl Med*. 2019;7(16):380. doi:[10.21037/atm.2019.07.59](https://doi.org/10.21037/atm.2019.07.59)
259. Zheng P, Luo Q, Wang W, Li J, Wang T, Wang P, Chen L, Zhang P, Chen H, Liu Y, et al. Tumor-associated macrophages-derived exosomes promote the migration of gastric cancer cells by transfer of functional Apolipoprotein E. *Cell Death Dis*. 2018;9(4):434. doi:[10.1038/s41419-018-0465-5](https://doi.org/10.1038/s41419-018-0465-5)
260. Maruyama S, Furuya S, Shiraishi K, Shimizu H, Akaike H, Hosomura N, Kawaguchi Y, Amemiya H, Kawaida H, Sudo M, et al. Podoplanin Expression as a Prognostic Factor in Gastric Cancer. *Anticancer Res*. 2018;38(5):2717–2722. doi:[10.21873/anticancer.12513](https://doi.org/10.21873/anticancer.12513)
261. Zhang M, Dong BB, Lu M, Zheng MJ, Chen H, Ding JZ, Xu AM, Xu YH. miR-429 functions as a tumor suppressor by targeting FSCN1 in gastric cancer cells. *Onco Targets Ther*. 2016;9:1123–1133. doi:[10.2147/OTT.S91879](https://doi.org/10.2147/OTT.S91879)
262. Hsu KW, Fang WL, Huang KH, Huang TT, Lee HC, Hsieh RH, Chi CW, Yeh TS. Notch1 pathway-mediated microRNA-151-5p promotes gastric cancer progression. *Oncotarget*. 2016;7(25):38036–38051. doi:[10.18632/oncotarget.9342](https://doi.org/10.18632/oncotarget.9342)
263. Wang X, Liu Y, Shao D, Qian Z, Dong Z, Sun Y, Xing X, Cheng X, Du H, Hu Y, et al. Recurrent amplification of MYC and TNFRSF11B in 8q24 is associated with poor survival in patients with gastric cancer. *Gastric Cancer*. 2016;19(1):116–127. doi:[10.1007/s10120-015-0467-2](https://doi.org/10.1007/s10120-015-0467-2)
264. Geng B, Pan J, Zhao T, Ji J, Zhang C, Che Y, Yang J, Shi H, Li J, Zhou H, et al. Chitinase 3-like 1-CD44 interaction promotes metastasis and epithelial-to-mesenchymal transition through  $\beta$ -catenin/Erk/Akt signaling in gastric cancer. *J Exp Clin Cancer Res*. 2018;37(1):208. doi:[10.1186/s13046-018-0876-2](https://doi.org/10.1186/s13046-018-0876-2)

265. Aquea G, Bresky G, Lancellotti D, Madariaga JA, Zaffiri V, Urzúa Tobar U, Haberle S, Bernal G. Increased expression of P2RY2, CD248 and EphB1 in gastric cancers from Chilean patients. *Asian Pac J Cancer Prev.* 2014;15(5):1931–1936. doi:[10.7314/apjcp.2014.15.5.1931](https://doi.org/10.7314/apjcp.2014.15.5.1931)
266. Lo PK, Yao Y, Lee JS, Zhang Y, Huang W, Kane MA, Zhou Q. LIPG signaling promotes tumor initiation and metastasis of human basal-like triple-negative breast cancer. *Elife.* 2018;7:e31334. doi:[10.7554/eLife.31334](https://doi.org/10.7554/eLife.31334)
267. Grill JI, Neumann J, Ofner A, et al. Drol/Ccdc80 inactivation promotes AOM/DSS-induced colorectal carcinogenesis and aggravates colitis by DSS in mice. *Carcinogenesis.* 2018;39(9):1176–1184. doi:[10.1093/carcin/bgy077](https://doi.org/10.1093/carcin/bgy077)
268. Lehtinen L, Vainio P, Wikman H, Huhtala H, Mueller V, Kallioniemi A, Pantel K, Kronqvist P, Kallioniemi O, Carpèn O, et al. PLA2G7 associates with hormone receptor negativity in clinical breast cancer samples and regulates epithelial-mesenchymal transition in cultured breast cancer cells. *J Pathol Clin Res.* 2017;3(2):123–138. doi:[10.1002/cjp2.69](https://doi.org/10.1002/cjp2.69)
269. Zhang B, Cheng B, Li FS, Ding JH, Feng YY, Zhuo GZ, Wei HF, Zhao K. High expression of CD39/ENTPD1 in malignant epithelial cells of human rectal adenocarcinoma. *Tumour Biol.* 2015;36(12):9411–9419. doi:[10.1007/s13277-015-3683-9](https://doi.org/10.1007/s13277-015-3683-9)
270. Ning PF, Liu HJ, Yuan Y. Dynamic expression of pepsinogen C in gastric cancer, precancerous lesions and Helicobacter pylori associated gastric diseases. *World J Gastroenterol.* 2005;11(17):2545–2548. doi:[10.3748/wjg.v11.i17.2545](https://doi.org/10.3748/wjg.v11.i17.2545)
271. Watanabe T, Fujii T, Oya T, Horikawa N, Tabuchi Y, Takahashi Y, Morii M, Takeguchi N, Tsukada K, Sakai H. Involvement of aquaporin-5 in differentiation of human gastric cancer cells. *J Physiol Sci.* 2009;59(2):113–122. doi:[10.1007/s12576-008-0017-3](https://doi.org/10.1007/s12576-008-0017-3)
272. Peng P, Wu W, Zhao J, Song S, Wang X, Jia D, Shao M, Zhang M, Li L, Wang L, et al. Decreased expression of Calpain-9 predicts unfavorable prognosis in patients with gastric cancer. *Sci Rep.* 2016;6:29604. doi:[10.1038/srep29604](https://doi.org/10.1038/srep29604)
273. Inoue Y, Matsuura S, Yoshimura K, Iwashita Y, Kahyo T, Kawase A, Tanahashi M, Maeda M, Ogawa H, Inui N, et al. Characterization of V-set

- and immunoglobulin domain containing 1 exerting a tumor suppressor function in gastric, lung, and esophageal cancer cells. *Cancer Sci.* 2017;108(8):1701–1714. doi:[10.1111/cas.13295](https://doi.org/10.1111/cas.13295)
274. Liu X, Chen Z, Zhao X, Huang M, Wang C, Peng W, Yin J, Li J, He G, Li X, et al. Effects of IGF2BP2, KCNQ1 and GCKR polymorphisms on clinical outcome in metastatic gastric cancer treated with EOF regimen. *Pharmacogenomics.* 2015;16(9):959–970. doi:[10.2217/pgs.15.49](https://doi.org/10.2217/pgs.15.49)
275. Soutto M, Chen Z, Saleh MA, Katsha A, Zhu S, Zaika A, Belkhiri A, El-Rifai W. TFF1 activates p53 through down-regulation of miR-504 in gastric cancer. *Oncotarget.* 2014;5(14):5663–5673. doi:[10.18632/oncotarget.2156](https://doi.org/10.18632/oncotarget.2156)
276. Peterson AJ, Menheniott TR, O'Connor L, Walduck AK, Fox JG, Kawakami K, Minamoto T, Ong EK, Wang TC, Judd LM, et al. Helicobacter pylori infection promotes methylation and silencing of trefoil factor 2, leading to gastric tumor development in mice and humans. *Gastroenterology.* 2010;139(6):2005–2017. doi:[10.1053/j.gastro.2010.08.043](https://doi.org/10.1053/j.gastro.2010.08.043)
277. Pan J, Fan Z, Wang Z, Dai Q, Xiang Z, Yuan F, Yan M, Zhu Z, Liu B, Li C. CD36 mediates palmitate acid-induced metastasis of gastric cancer via AKT/GSK-3 $\beta$ / $\beta$ -catenin pathway. *J Exp Clin Cancer Res.* 2019;38(1):52. doi:[10.1186/s13046-019-1049-7](https://doi.org/10.1186/s13046-019-1049-7)
278. Di Stadio CS, Altieri F, Minopoli G, Miselli G, Ripa E, Arcari P. Role of human GKN1 on APP processing in gastric cancer. *Biochimie.* 2017;135:149–153. doi:[10.1016/j.biochi.2017.02.007](https://doi.org/10.1016/j.biochi.2017.02.007)
279. Qian Y, Wong CC, Xu J, Chen H, Zhang Y, Kang W, Wang H, Zhang L, Li W, Chu ES, et al. Sodium Channel Subunit SCNN1B Suppresses Gastric Cancer Growth and Metastasis via GRP78 Degradation. *Cancer Res.* 2017;77(8):1968–1982. doi:[10.1158/0008-5472.CAN-16-1595](https://doi.org/10.1158/0008-5472.CAN-16-1595)
280. Kim M, Pyo S, Kang CH, Lee CO, Lee HK, Choi SU, Park CH. Folate receptor 1 (FOLR1) targeted chimeric antigen receptor (CAR) T cells for the treatment of gastric cancer. *PLoS One.* 2018;13(6):e0198347. doi:[10.1371/journal.pone.0198347](https://doi.org/10.1371/journal.pone.0198347)
281. Nguyen DM, Parekh PR, Chang ET, Sharma NK, Carrier F. Contribution of Dual Oxidase 2 (DUOX2) to Hyper-Radiosensitivity in

- Human Gastric Cancer Cells. *Radiat Res.* 2015;184(2):151–160. doi:[10.1667/rr13661.1](https://doi.org/10.1667/rr13661.1)
282. Li Y, Chen S, Shan Z, Bi L, Yu S, Li Y, Xu S. miR-182-5p improves the viability, mitosis, migration, and invasion ability of human gastric cancer cells by down-regulating RAB27A. *Biosci Rep.* 2017;37(3):BSR20170136. doi:[10.1042/BSR20170136](https://doi.org/10.1042/BSR20170136)
283. Park YS, Lee JH, Jung DB, Kim HB, Jung JH, Pak S, Ryu YM, Park HJ, Park YY, Jung HY, et al. MicroRNA-21 induces loss of 15-hydroxyprostaglandin dehydrogenase in early gastric tubular adenocarcinoma. *Sci Rep.* 2018;8(1):17717. doi:[10.1038/s41598-018-36139-z](https://doi.org/10.1038/s41598-018-36139-z)
284. Yao Y, Yang X, Sun L, Sun S, Huang X, Zhou D, Li T, Zhang W, Abumrad NA, Zhu X, et al. Fatty acid 2-hydroxylation inhibits tumor growth and increases sensitivity to cisplatin in gastric cancer. *EBioMedicine.* 2019;41:256–267. doi:[10.1016/j.ebiom.2019.01.066](https://doi.org/10.1016/j.ebiom.2019.01.066)
285. Kong Y, Zheng Y, Jia Y, Li P, Wang Y. Decreased LIPF expression is correlated with DGKA and predicts poor outcome of gastric cancer. *Oncol Rep.* 2016;36(4):1852–1860. doi:[10.3892/or.2016.4989](https://doi.org/10.3892/or.2016.4989)
286. Liu X, Chen Z, Zhao X, Huang M, Wang C, Peng W, Yin J, Li J, He G, Li X, et al. Effects of IGF2BP2, KCNQ1 and GCKR polymorphisms on clinical outcome in metastatic gastric cancer treated with EOF regimen. *Pharmacogenomics.* 2015;16(9):959–970. doi:[10.2217/pgs.15.49](https://doi.org/10.2217/pgs.15.49)
287. Ahmed SMU, Jiang ZN, Zheng ZH, Li Y, Wang XJ, Tang X. AKR1B10 expression predicts response of gastric cancer to neoadjuvant chemotherapy. *Oncol Lett.* 2019;17(1):773–780. doi:[10.3892/ol.2018.9705](https://doi.org/10.3892/ol.2018.9705)
288. Hu WG, Hu JJ, Cai W, Zheng MH, Zang L, Wang ZT, Zhu ZG. The NAD(P)H: quinone oxidoreductase 1 (NQO1) gene 609 C>T polymorphism is associated with gastric cancer risk: evidence from a case-control study and a meta-analysis. *Asian Pac J Cancer Prev.* 2014;15(5):2363–2367. doi:[10.7314/apjcp.2014.15.5.2363](https://doi.org/10.7314/apjcp.2014.15.5.2363)
289. Zhang C, Xu W, Pan W, Wang N, Li G, Fan X, Xu X, Shen S, Das UN. Selenium-binding protein 1 may decrease gastric cellular proliferation and migration. *Int J Oncol.* 2013;42(5):1620–1629. doi:[10.3892/ijo.2013.1850](https://doi.org/10.3892/ijo.2013.1850)

290. Min SY, Kim HS, Jung EJ, Jung EJ, Jee CD, Kim WH. Prognostic significance of glutathione peroxidase 1 (GPX1) down-regulation and correlation with aberrant promoter methylation in human gastric cancer. *Anticancer Res.* 2012;32(8):3169–3175.
291. Wu J, Niu Q, Yuan J, Xu X, Cao L. Novel compound cedrelone inhibits hepatocellular carcinoma progression via PBLD and Ras/Rap1. *Exp Ther Med.* 2019;18(6):4209–4220. doi:[10.3892/etm.2019.8080](https://doi.org/10.3892/etm.2019.8080)
292. Tang X, Mahajan SS, Nguyen LT, Béliveau F, Leduc R, Simon JA, Vasioukhin V. Targeted inhibition of cell-surface serine protease Hepsin blocks prostate cancer bone metastasis. *Oncotarget.* 2014;5(5):1352–1362. doi:[10.18632/oncotarget.1817](https://doi.org/10.18632/oncotarget.1817)
293. Mhaweche-Fauceglia P, Walia S, Yessaian A, Machida H, Matsuo K, Lawrenson K. Overexpression of HOMER2 predicts better outcome in low-grade endometrioid endometrial adenocarcinoma. *Pathology.* 2018;50(5):499–503. doi:[10.1016/j.pathol.2018.03.004](https://doi.org/10.1016/j.pathol.2018.03.004)
294. Wu Y, Antony S, Juhasz A, et al. Up-regulation and sustained activation of Stat1 are essential for interferon-gamma (IFN-gamma)-induced dual oxidase 2 (Duox2) and dual oxidase A2 (DuoxA2) expression in human pancreatic cancer cell lines. *J Biol Chem.* 2011;286(14):12245–12256. doi:[10.1074/jbc.M110.191031](https://doi.org/10.1074/jbc.M110.191031)
295. Guan X, Luo L, Begum G, Kohanbash G, Song Q, Rao A, Amankulor N, Sun B, Sun D, Jia W. Elevated Na/H exchanger 1 (SLC9A1) emerges as a marker for tumorigenesis and prognosis in gliomas. *J Exp Clin Cancer Res.* 2018;37(1):255. doi:[10.1186/s13046-018-0923-z](https://doi.org/10.1186/s13046-018-0923-z)
296. Little AC, Sham D, Hristova M, Danyal K, Heppner DE, Bauer RA, Sipsey LM, Habibovic A, Van Der Vliet A. DUOX1 silencing in lung cancer promotes EMT, cancer stem cell characteristics and invasive properties. *Oncogenesis.* 2016;5(10):e261. doi:[10.1038/oncsis.2016.61](https://doi.org/10.1038/oncsis.2016.61)
297. Zhang C, Wang H, Chen Z, Zhuang L, Xu L, Ning Z, Zhu Z, Wang P, Meng Z. Carbonic anhydrase 2 inhibits epithelial-mesenchymal transition and metastasis in hepatocellular carcinoma. *Carcinogenesis.* 2018;39(4):562–570. doi:[10.1093/carcin/bgx148](https://doi.org/10.1093/carcin/bgx148)
298. Gao S, Zhao Z, Wu R, Wu L, Tian X, Zhang Z. MicroRNA-194 regulates cell viability and apoptosis by targeting CDH2 in prostatic cancer. *Onco Targets Ther.* 2018;11:4837–4844. doi:[10.2147/OTT.S169101](https://doi.org/10.2147/OTT.S169101)



299. Yu DL, Li HW, Wang Y, Li CQ, You D, Jiang L, Song YP, Li XH. Acyl-CoA dehydrogenase long chain expression is associated with esophageal squamous cell carcinoma progression and poor prognosis. *Oncotargets Ther.* 2018;11:7643–7653. doi:[10.2147/OTT.S171963](https://doi.org/10.2147/OTT.S171963)
300. Zou Q, Yang ZL, Yuan Y, Li JH, Liang LF, Zeng GX, Chen SL. Clinicopathological features and CCT2 and PDIA2 expression in gallbladder squamous/adenosquamous carcinoma and gallbladder adenocarcinoma. *World J Surg Oncol.* 2013;11:143. doi:[10.1186/1477-7819-11-143](https://doi.org/10.1186/1477-7819-11-143)
301. Giovannetti E, Wang Q, Avan A, Funel N, Lagerweij T, Lee JH, Caretti V, van der Velde A, Boggi U, Wang Y, et al. Role of CYB5A in pancreatic cancer prognosis and autophagy modulation. *J Natl Cancer Inst.* 2014;106(1):djt346. doi:[10.1093/jnci/djt346](https://doi.org/10.1093/jnci/djt346)
302. da Silveira Mitteldorf CA, de Sousa-Canavez JM, Leite KR, Massumoto C, Camara-Lopes LH. FN1, GALE, MET, and QPCT overexpression in papillary thyroid carcinoma: molecular analysis using frozen tissue and routine fine-needle aspiration biopsy samples. *Diagn Cytopathol.* 2011;39(8):556–561. doi:[10.1002/dc.21423](https://doi.org/10.1002/dc.21423)
303. Liu XP, Yin XH, Meng XY, Yan XH, Cao Y, Zeng XT, Wang XH. DHCR24 predicts poor clinicopathological features of patients with bladder cancer: A STROBE-compliant study. *Medicine (Baltimore).* 2018;97(39):e11830. doi:[10.1097/MD.00000000000011830](https://doi.org/10.1097/MD.00000000000011830)
304. Maman S, Sagi-Assif O, Yuan W, Ginat R, Meshel T, Zubrilov I, Keisari Y, Lu W, Lu W, Witz IP. The Beta Subunit of Hemoglobin (HBB2/HBB) Suppresses Neuroblastoma Growth and Metastasis. *Cancer Res.* 2017;77(1):14–26. doi:[10.1158/0008-5472.CAN-15-2929](https://doi.org/10.1158/0008-5472.CAN-15-2929)
305. Rodriguez-Aguayo C, Bayraktar E, Ivan C, Aslan B, Mai J, He G, Mangala LS, Jiang D, Nagaraja AS, Ozpolat B, et al. PTGER3 induces ovary tumorigenesis and confers resistance to cisplatin therapy through up-regulation Ras-MAPK/Erk-ETS1-ELK1/CFTR1 axis. *EBioMedicine.* 2019;40:290–304. doi:[10.1016/j.ebiom.2018.11.045](https://doi.org/10.1016/j.ebiom.2018.11.045)
306. Worst TS, Meyer Y, Gottschalt M, Weis CA, Von Hardenberg J, Frank C, Steidler A, Michel MS, Erben P. RAB27A, RAB27B and VPS36 are downregulated in advanced prostate cancer and show functional relevance in prostate cancer cells. *Int J Oncol.* 2017;50(3):920–932. doi:[10.3892/ijo.2017.3872](https://doi.org/10.3892/ijo.2017.3872)



307. Fernandez AI, Geng X, Chaldekas K, Harris B, Duttargi A, Berry VL, Berry DL, Mahajan A, Cavalli LR, Györfy B, et al. The orphan nuclear receptor estrogen-related receptor beta (ERR $\beta$ ) in triple-negative breast cancer. *Breast Cancer Res Treat.* 2020;179(3):585–604. doi:[10.1007/s10549-019-05485-5](https://doi.org/10.1007/s10549-019-05485-5)
308. Lu J, Chen Z, Zhao H, Dong H, Zhu L, Zhang Y, Wang J, Zhu H, Cui Q, Qi C, et al. ABAT and ALDH6A1, regulated by transcription factor HNF4A, suppress tumorigenic capability in clear cell renal cell carcinoma. *J Transl Med.* 2020;18(1):101. doi:[10.1186/s12967-020-02268-1](https://doi.org/10.1186/s12967-020-02268-1)
309. Seibert JK, Quagliata L, Quintavalle C, Hammond TG, Terracciano L, Odermatt A. A role for the dehydrogenase DHRS7 (SDR34C1) in prostate cancer. *Cancer Med.* 2015;4(11):1717–1729. doi:[10.1002/cam4.517](https://doi.org/10.1002/cam4.517)
310. Wang Y, Li G, Wan F, Dai B, Ye D. Prognostic value of D-lactate dehydrogenase in patients with clear cell renal cell carcinoma. *Oncol Lett.* 2018;16(1):866–874. doi:[10.3892/ol.2018.8782](https://doi.org/10.3892/ol.2018.8782)
311. Shimomura H, Sasahira T, Nakashima C, Shimomura-Kurihara M, Kirita T. Downregulation of DHRS9 is associated with poor prognosis in oral squamous cell carcinoma. *Pathology.* 2018;50(6):642–647. doi:[10.1016/j.pathol.2018.06.002](https://doi.org/10.1016/j.pathol.2018.06.002)
312. Xue Y, Wu L, Liu Y, Ma Y, Zhang L, Ma X, Yang Y, Chen J. ENTPD5 induces apoptosis in lung cancer cells via regulating caspase 3 expression. *PLoS One.* 2015;10(3):e0120046. doi:[10.1371/journal.pone.0120046](https://doi.org/10.1371/journal.pone.0120046)
313. Zhang Q, Hong Z, Zhu J, Zeng C, Tang Z, Wang W, Huang H. miR-4999-5p Predicts Colorectal Cancer Survival Outcome and Reprograms Glucose Metabolism by Targeting PRKAA2. *Onco Targets Ther.* 2020;13:1199–1210. doi:[10.2147/OTT.S234666](https://doi.org/10.2147/OTT.S234666)
314. Sánchez-Rodríguez R, Torres-Mena JE, Quintanar-Jurado V, Chagoya-Hazas V, del Castillo ER, del Pozo Yauner L, Villa-Treviño S, Pérez-Carreón JI. Ptgr1 expression is regulated by NRF2 in rat hepatocarcinogenesis and promotes cell proliferation and resistance to oxidative stress. *Free Radic Biol Med.* 2017;102:87–99. doi:[10.1016/j.freeradbiomed.2016.11.027](https://doi.org/10.1016/j.freeradbiomed.2016.11.027)
315. Hu YH, Ma S, Zhang XN, Zhang ZY, Zhu HF, Ji YH, Li J, Qian XL, Wang YX. Hypermethylation Of ADHFE1 Promotes The Proliferation Of

- Colorectal Cancer Cell Via Modulating Cell Cycle Progression. *Onco Targets Ther.* 2019;12:8105–8115. doi:[10.2147/OTT.S223423](https://doi.org/10.2147/OTT.S223423)
316. Yamaguchi M, Osuka S, Weitzmann MN, Shoji M, Murata T. Increased regucalcin gene expression extends survival in breast cancer patients: Overexpression of regucalcin suppresses the proliferation and metastatic bone activity in MDA-MB-231 human breast cancer cells in vitro. *Int J Oncol.* 2016;49(2):812–822. doi:[10.3892/ijo.2016.3538](https://doi.org/10.3892/ijo.2016.3538)
317. Zhu L, Xing S, Zhang L, Yu JM, Lin C, Yang WJ. Involvement of Polo-like kinase 1 (Plk1) in quiescence regulation of cancer stem-like cells of the gastric cancer cell lines. *Oncotarget.* 2017;8(23):37633–37645. doi:[10.18632/oncotarget.16839](https://doi.org/10.18632/oncotarget.16839)
318. Pandi NS, Manimuthu M, Harunipriya P, Murugesan M, Asha GV, Rajendran S. In silico analysis of expression pattern of a Wnt/ $\beta$ -catenin responsive gene ANLN in gastric cancer. *Gene.* 2014;545(1):23–29. doi:[10.1016/j.gene.2014.05.013](https://doi.org/10.1016/j.gene.2014.05.013)
319. Zhang X, Wang W, Li P, Wang X, Ni K. High TREM2 expression correlates with poor prognosis in gastric cancer. *Hum Pathol.* 2018;72:91–99. doi:[10.1016/j.humpath.2017.10.026](https://doi.org/10.1016/j.humpath.2017.10.026)
320. Rabenau KE, O'Toole JM, Bassi R, Kotanides H, Witte L, Ludwig DL, Pereira DS. DEGA/AMIGO-2, a leucine-rich repeat family member, differentially expressed in human gastric adenocarcinoma: effects on ploidy, chromosomal stability, cell adhesion/migration and tumorigenicity. *Oncogene.* 2004;23(29):5056–5067. doi:[10.1038/sj.onc.1207681](https://doi.org/10.1038/sj.onc.1207681)
321. Kaya S, Gumus M, Gurbuz Y, Cabuk D, Acikgoz O, Temiz S, Uygun K. The prognostic value of  $\beta$ -catenin and LEF-1 expression in patients with operable gastric carcinoma. *Am J Transl Res.* 2016;8(2):1228–1236.
322. Kang H, An HJ, Song JY, Kim TH, Heo JH, Ahn DH, Kim G. Notch3 and Jagged2 contribute to gastric cancer development and to glandular differentiation associated with MUC2 and MUC5AC expression. *Histopathology.* 2012;61(4):576–586. doi:[10.1111/j.1365-2559.2012.04274.x](https://doi.org/10.1111/j.1365-2559.2012.04274.x)
323. He XY, Zhao J, Chen ZQ, Jin R, Liu CY. High Expression of Retinoic Acid Induced 14 (RAI14) in Gastric Cancer and Its Prognostic Value. *Med Sci Monit.* 2018;24:2244–2251. doi:[10.12659/msm.910133](https://doi.org/10.12659/msm.910133)

324. Sun WJ, Hu DH, Wu H, Xiao H, Lu MD, Guo WJ, Huang H, Yu YJ, Hu TY, Zheng ZQ. Expression of AQP1 Was Associated with Apoptosis and Survival of Patients in Gastric Adenocarcinoma. *Dig Surg.* 2016;33(3):190–196. doi:[10.1159/000443843](https://doi.org/10.1159/000443843)
325. Kato F, Wada N, Hayashida T, Fukuda K, Nakamura R, Takahashi T, Kawakubo H, Takeuchi H, Kitagawa Y. Experimental and clinicopathological analysis of HOXB9 in gastric cancer. *Oncol Lett.* 2019;17(3):3097–3102. doi:[10.3892/ol.2019.10008](https://doi.org/10.3892/ol.2019.10008)
326. Yang JY, Li D, Zhang Y, Guan BX, Gao P, Zhou XC, Zhou CJ. The Expression of MCM7 is a Useful Biomarker in the Early Diagnostic of Gastric Cancer. *Pathol Oncol Res.* 2018;24(2):367–372. doi:[10.1007/s12253-017-0251-1](https://doi.org/10.1007/s12253-017-0251-1)
327. Liu M, Li JS, Tian DP, Huang B, Rosqvist S, Su M. MCM2 expression levels predict diagnosis and prognosis in gastric cardiac cancer. *Histol Histopathol.* 2013;28(4):481–492. doi:[10.14670/HH-28.481](https://doi.org/10.14670/HH-28.481)
328. Zhao B, Zhang J, Chen X, Xu H, Huang B. Mir-26b inhibits growth and resistance to paclitaxel chemotherapy by silencing the CDC6 gene in gastric cancer. *Arch Med Sci.* 2019;15(2):498–503. doi:[10.5114/aoms.2018.73315](https://doi.org/10.5114/aoms.2018.73315)
329. Zhu Z, Yu Z, Rong Z, Luo Z, Zhang J, Qiu Z, Huang C. The novel GINS4 axis promotes gastric cancer growth and progression by activating Rac1 and CDC42. *Theranostics.* 2019;9(26):8294–8311. doi:[10.7150/thno.36256](https://doi.org/10.7150/thno.36256)
330. Ma H, Chen X, Hu H, Li B, Ying X, Zhou C, Zhong J, Zhao G, Duan S. Hypermethylation of MDFI promoter with NSCLC is specific for females, non-smokers and people younger than 65. *Oncol Lett.* 2018;15(6):9017–9024. doi:[10.3892/ol.2018.8535](https://doi.org/10.3892/ol.2018.8535)
331. Kuo KK, Jian SF, Li YJ, Wan SW, Weng CC, Fang K, Wu DC, Cheng KH. Epigenetic inactivation of transforming growth factor- $\beta$ 1 target gene HEYL, a novel tumor suppressor, is involved in the P53-induced apoptotic pathway in hepatocellular carcinoma. *Hepatol Res.* 2015;45(7):782–793. doi:[10.1111/hepr.12414](https://doi.org/10.1111/hepr.12414)
332. Yuan Z, Mehta HJ, Mohammed K, Nasreen N, Roman R, Brantly M, Sadikot RT. TREM-1 is induced in tumor associated macrophages by cyclo-

- oxygenase pathway in human non-small cell lung cancer. *PLoS One*. 2014;9(5):e94241. doi:[10.1371/journal.pone.0094241](https://doi.org/10.1371/journal.pone.0094241)
333. Chung FF, Mai CW, Ng PY, Leong CO. Cytochrome P450 2W1 (CYP2W1) in Colorectal Cancers. *Curr Cancer Drug Targets*. 2016;16(1):71–78. doi:[10.2174/1568009616888151112095948](https://doi.org/10.2174/1568009616888151112095948)
334. Feigin ME, Xue B, Hammell MC, Muthuswamy SK. G-protein-coupled receptor GPR161 is overexpressed in breast cancer and is a promoter of cell proliferation and invasion. *Proc Natl Acad Sci U S A*. 2014;111(11):4191–4196. doi:[10.1073/pnas.1320239111](https://doi.org/10.1073/pnas.1320239111)
335. Lawson CD, Der CJ. Filling GAPs in our knowledge: ARHGAP11A and RACGAP1 act as oncogenes in basal-like breast cancers. *Small GTPases*. 2018;9(4):290–296. doi:[10.1080/21541248.2016.1220350](https://doi.org/10.1080/21541248.2016.1220350)
336. Tolkach Y, Ellinger J, Kremer A, Esser L, Müller SC, Stephan C, Jung K, Toma M, Kristiansen G, Hauser S. Apelin and apelin receptor expression in renal cell carcinoma. *Br J Cancer*. 2019;120(6):633–639. doi:[10.1038/s41416-019-0396-7](https://doi.org/10.1038/s41416-019-0396-7)
337. Zheng S, Lv P, Su J, Miao K, Xu H, Li M. Overexpression of CBX2 in breast cancer promotes tumor progression through the PI3K/AKT signaling pathway. *Am J Transl Res*. 2019;11(3):1668–1682.
338. Chen X, Xiong D, Ye L, Wang K, Huang L, Mei S, Wu J, Chen S, Lai X, Zheng L, et al. Up-regulated lncRNA XIST contributes to progression of cervical cancer via regulating miR-140-5p and ORC1. *Cancer Cell Int*. 2019;19:45. doi:[10.1186/s12935-019-0744-y](https://doi.org/10.1186/s12935-019-0744-y)
339. Mahadevappa R, Neves H, Yuen SM, Jameel M, Bai Y, Yuen HF, Zhang SD, Zhu Y, Lin Y, Kwok HF. Mahadevappa R, Neves H, Yuen SM, et al. DNA Replication Licensing Protein MCM10 Promotes Tumor Progression and Is a Novel Prognostic Biomarker and Potential Therapeutic Target in Breast Cancer. *Cancers (Basel)*. 2018;10(9):282. doi:[10.3390/cancers10090282](https://doi.org/10.3390/cancers10090282)
340. Yang L, Xu JF, Kang Q, Li AQ, Jin P, Wang X, He YQ, Li N, Cheng T, Sheng JQ. Predictive Value of Stemness Factor Sox2 in Gastric Cancer Is Associated with Tumor Location and Stage. *PLoS One*. 2017;12(1):e0169124. doi:[10.1371/journal.pone.0169124](https://doi.org/10.1371/journal.pone.0169124)
341. Yang S, Lu M, Chen Y, Meng D, Sun R, Yun D, Zhao Z, Lu D, Li Y. Overexpression of eukaryotic elongation factor 1 alpha-2 is associated with

- poorer prognosis in patients with gastric cancer. *J Cancer Res Clin Oncol*. 2015;141(7):1265–1275. doi:[10.1007/s00432-014-1897-7](https://doi.org/10.1007/s00432-014-1897-7)
342. Shimoyama S, Kaminishi M. Angiogenin in sera as an independent prognostic factor in gastric cancer. *J Cancer Res Clin Oncol*. 2003;129(4):239–244. doi:[10.1007/s00432-003-0422-1](https://doi.org/10.1007/s00432-003-0422-1)
343. Zhang B, Bie Q, Wu P, Zhang J, You B, Shi H, Qian H, Xu W. PGD2/PTGDR2 Signaling Restricts the Self-Renewal and Tumorigenesis of Gastric Cancer. *Stem Cells*. 2018;36(7):990–1003. doi:[10.1002/stem.2821](https://doi.org/10.1002/stem.2821)
344. Xu J, Gong L, Qian Z, Song G, Liu J. ERBB4 promotes the proliferation of gastric cancer cells via the PI3K/Akt signaling pathway. *Oncol Rep*. 2018;39(6):2892–2898. doi:[10.3892/or.2018.6343](https://doi.org/10.3892/or.2018.6343)
345. Abbott GW, Roepke TK. KCNE2 and gastric cancer: bench to bedside. *Oncotarget*. 2016;7(14):17286–17287. doi:[10.18632/oncotarget.7921](https://doi.org/10.18632/oncotarget.7921)
346. Kato Y, Yashiro M, Noda S, Kashiwagi S, Matsuoka J, Fuyuhiko Y, Doi Y, Hirakawa K. Expression of a hypoxia-associated protein, carbonic anhydrase-9, correlates with malignant phenotypes of gastric carcinoma. *Digestion*. 2010;82(4):246–251. doi:[10.1159/000297208](https://doi.org/10.1159/000297208)
347. Qiao L, Feng Y. Genetic variations of prostate stem cell antigen (PSCA) contribute to the risk of gastric cancer for Eastern Asians: a meta-analysis based on 16792 individuals. *Gene*. 2012;493(1):83–91. doi:[10.1016/j.gene.2011.11.017](https://doi.org/10.1016/j.gene.2011.11.017)
348. Qi ZH, Xu HX, Zhang SR, Xu JZ, Li S, Gao HL, Jin W, Wang WQ, Wu CT, Ni QX, et al. RIPK4/PEBP1 axis promotes pancreatic cancer cell migration and invasion by activating RAF1/MEK/ERK signaling. *Int J Oncol*. 2018;52(4):1105–1116. doi:[10.3892/ijo.2018.4269](https://doi.org/10.3892/ijo.2018.4269)
349. Li Z, Mou H, Wang T, Xue J, Deng B, Qian L, Zhou Y, Gong W, Wang JM, Wu G, et al. A non-secretory form of FAM3B promotes invasion and metastasis of human colon cancer cells by upregulating Slug expression. *Cancer Lett*. 2013;328(2):278–284. doi:[10.1016/j.canlet.2012.09.026](https://doi.org/10.1016/j.canlet.2012.09.026)
350. Yang H, Zhang H, Ge S, Ning T, Bai M, Li J, Li S, Sun W, Deng T, Zhang L, et al. Exosome-Derived miR-130a Activates Angiogenesis in Gastric Cancer by Targeting C-MYB in Vascular Endothelial Cells. *Mol Ther*. 2018;26(10):2466–2475. doi:[10.1016/j.ymthe.2018.07.023](https://doi.org/10.1016/j.ymthe.2018.07.023)

351. Pan L, Liang W, Gu J, Zang X, Huang Z, Shi H, Chen J, Fu M, Zhang P, Xiao X, et al. Long noncoding RNA DANCR is activated by SALL4 and promotes the proliferation and invasion of gastric cancer cells. *Oncotarget*. 2017;9(2):1915–1930. doi:[10.18632/oncotarget.23019](https://doi.org/10.18632/oncotarget.23019)
352. Tsutsumi K, Sato N, Cui L, Mizumoto K, Sadakari Y, Fujita H, Ohuchida K, Ohtsuka T, Takahata S, Tanaka M. Expression of claudin-4 (CLDN4) mRNA in intraductal papillary mucinous neoplasms of the pancreas. *Mod Pathol*. 2011;24(4):533–541. doi:[10.1038/modpathol.2010.218](https://doi.org/10.1038/modpathol.2010.218)
353. Liu H, Du F, Sun L, Wu Q, Wu J, Tong M, Wang X, Wang Q, Cao T, Gao X, et al. GATA6 suppresses migration and metastasis by regulating the miR-520b/CREB1 axis in gastric cancer. *Cell Death Dis*. 2019;10(2):35. doi:[10.1038/s41419-018-1270-x](https://doi.org/10.1038/s41419-018-1270-x)
354. Li X, Li Z, Liu Z, Xiao J, Yu S, Song Y. Long non-coding RNA DLEU1 predicts poor prognosis of gastric cancer and contributes to cell proliferation by epigenetically suppressing KLF2. *Cancer Gene Ther*. 2018;25(3-4):58–67. doi:[10.1038/s41417-017-0007-9](https://doi.org/10.1038/s41417-017-0007-9)
355. Zhang R, Zhu JC, Hu H, Lin QY, Shao W, Ji TH. MicroRNA-140-5p suppresses invasion and proliferation of glioma cells by targeting glutamate-ammonia ligase (GLUL). *Neoplasma*. 2020;67(2):371–378. doi:[10.4149/neo\\_2020\\_190514N432](https://doi.org/10.4149/neo_2020_190514N432)
356. Araújo TM, Seabra AD, Lima EM, Assumpção PP, Montenegro RC, Demachki S, Burbano RM, Khayat AS. Recurrent amplification of RTEL1 and ABCA13 and its synergistic effect associated with clinicopathological data of gastric adenocarcinoma. *Mol Cytogenet*. 2016;9:52. doi:[10.1186/s13039-016-0260-x](https://doi.org/10.1186/s13039-016-0260-x)
357. Hour TC, Kuo YZ, Liu GY, Kang WY, Huang CY, Tsai YC, Wu WJ, Huang SP, Pu YS. ownregulation of ABCD1 in human renal cell carcinoma. *Int J Biol Markers*. 2009;24(3):171–178. doi:[10.5301/jbm.2009.3280](https://doi.org/10.5301/jbm.2009.3280)
358. Liang Y, Luo H, Zhang H, Dong Y, Bao Y. Oncogene Delta/Notch-Like EGF-Related Receptor Promotes Cell Proliferation, Invasion, and Migration in Hepatocellular Carcinoma and Predicts a Poor Prognosis.



- Cancer Biother Radiopharm. 2018;33(9):380–386.  
doi:[10.1089/cbr.2018.2460](https://doi.org/10.1089/cbr.2018.2460)
359. Wang P, Zhuang C, Huang D, Xu K. Downregulation of miR-377 contributes to IRX3 deregulation in hepatocellular carcinoma. *Oncol Rep.* 2016;36(1):247–252. doi:[10.3892/or.2016.4815](https://doi.org/10.3892/or.2016.4815)
360. Mello AA, Leal MF, Rey JA, Pinto GR, Lamarão LM, Montenegro RC, Alves AP, Assumpcao PP, do Nascimento Borges B, Smith MC, et al. Deregulated Expression of SRC, LYN and CKB Kinases by DNA Methylation and Its Potential Role in Gastric Cancer Invasiveness and Metastasis. *PLoS One.* 2015;10(10):e0140492. doi:[10.1371/journal.pone.0140492](https://doi.org/10.1371/journal.pone.0140492)
361. Dabanaka K, Chung S, Nakagawa H, Nakamura Y, Okabayashi T, Sugimoto T, Hanazaki K, Furihata M. PKIB expression strongly correlated with phosphorylated Akt expression in breast cancers and also with triple-negative breast cancer subtype. *Med Mol Morphol.* 2012;45(4):229–233. doi:[10.1007/s00795-011-0565-0](https://doi.org/10.1007/s00795-011-0565-0)

## Tables

**Table 1.** Primers used for quantitative PCR

|         | Primer sequence (5'→3') |                         |         |
|---------|-------------------------|-------------------------|---------|
| Forward | Forward                 | Forward                 | Forward |
| FN1     | CGGTGGCTGTCAGTCAAAG     | AAACCTCGGCTTCCTCCATAA   |         |
| PLK1    | AAAGAGATCCCGGAGGTCCTA   | GGCTGCGGTGAATGGATATTTTC |         |
| ANLN    | TGCCAGGCGAGAGAATCTTC    | CGCTTAGCATGAGTCATAGACCT |         |
| MCM7    | CCTACCAGCCGATCCAGTCT    | CCTCCTGAGCGGTTGGTTT     |         |
| MCM2    | ATGGCGGAATCATCGGAATCC   | GGTGAGGGCATCAGTACGC     |         |
| EEF1A2  | GAAGACCCACATCAACATCGT   | CTCCGCATTTGTAGATGAGGTG  |         |
| PTGER3  | CGCCTCAACCACTCCTACAC    | GACACCGATCCGCAATCCTC    |         |
| CKB     | GCTGCGACTTCAGAAGCGA     | GGCATGAGGTCGTCGATGG     |         |
| ERBB4   | GTCCAGCCCAGCGATTCTC     | AGAGCCACTAACACGTAGCCT   |         |
| PRKAA2  | GTGAAGATCGGACACTACGTG   | CTGCCACTTTATGGCCTGTTA   |         |

**Table 2** The statistical metrics for key differentially expressed genes (DEGs)

| Gene Symbol | logFC    | pValue   | adj.P.Val | tvalue   | Regulation | Gene Name                      |
|-------------|----------|----------|-----------|----------|------------|--------------------------------|
| COL4A1      | 2.972614 | 1.62E-19 | 7.66E-16  | 10.92342 | Up         | collagen type IV alpha 1 chain |
| INHBA       | 4.080822 | 1.08E-18 | 3.39E-15  | 10.57369 | Up         | inhibin subunit beta A         |

|           |          |          |          |          |    |                                                                                  |
|-----------|----------|----------|----------|----------|----|----------------------------------------------------------------------------------|
| RCC2      | 1.607652 | 1.15E-18 | 3.39E-15 | 10.56222 | Up | regulator of chromosome condensation 2                                           |
| THY1      | 3.439673 | 7.51E-18 | 1.37E-14 | 10.21558 | Up | Thy-1 cell surface antigen                                                       |
| MSR1      | 2.674374 | 9.57E-18 | 1.62E-14 | 10.17093 | Up | macrophage scavenger receptor 1                                                  |
| FAP       | 4.024768 | 1.6E-17  | 2.36E-14 | 10.07644 | Up | fibroblast activation protein alpha                                              |
| SULF1     | 4.025951 | 2.37E-17 | 3.12E-14 | 10.00358 | Up | sulfatase 1                                                                      |
| SERPINH1  | 2.149675 | 4.17E-17 | 4.93E-14 | 9.899306 | Up | serpin family H member 1                                                         |
| E2F3      | 1.634912 | 1.01E-16 | 1.09E-13 | 9.734805 | Up | E2F transcription factor 3                                                       |
| GLT25D1   | 1.642413 | 2.15E-16 | 1.95E-13 | 9.596128 | Up | GLYCOSYLTRANSFERASE 25 FAMILY, MEMBER 1                                          |
| BGN       | 4.165579 | 2.62E-16 | 2.3E-13  | 9.55921  | Up | biglycan                                                                         |
| WISP1     | 3.125136 | 3.3E-16  | 2.6E-13  | 9.516536 | Up | Wnt1-inducible signaling pathway protein-1                                       |
| TCOF1     | 1.579282 | 4.8E-16  | 3.44E-13 | 9.44697  | Up | treacle ribosome biogenesis factor 1                                             |
| NID2      | 2.481827 | 5.63E-16 | 3.7E-13  | 9.417359 | Up | nidogen 2                                                                        |
| CAD       | 1.957354 | 8.28E-16 | 4.9E-13  | 9.345783 | Up | carbamoyl-phosphate synthetase 2, aspartate transcarbamylase, and dihydroorotase |
| ADCY3     | 1.8303   | 1.1E-15  | 6.21E-13 | 9.292654 | Up | adenylatecyclase 3                                                               |
| ITGAX     | 2.919285 | 1.3E-15  | 7.09E-13 | 9.26149  | Up | integrin subunit alpha X                                                         |
| ADAMTS12  | 3.296182 | 1.38E-15 | 7.12E-13 | 9.25041  | Up | ADAM metallopeptidase with thrombospondin type 1 motif 12                        |
| TRPM2     | 1.961827 | 1.62E-15 | 8E-13    | 9.220805 | Up | transient receptor potential cation channel subfamily M member 2                 |
| COL8A1    | 4.371259 | 2.07E-15 | 9.61E-13 | 9.175361 | Up | collagen type VIII alpha 1 chain                                                 |
| TREM2     | 2.785416 | 2.15E-15 | 9.8E-13  | 9.168072 | Up | triggering receptor expressed on myeloid cells 2                                 |
| MTHFD1L   | 2.041684 | 2.32E-15 | 1.02E-12 | 9.154495 | Up | methylenetetrahydrofolate dehydrogenase (NADP+ dependent) 1 like                 |
| TEAD4     | 1.8995   | 3.74E-15 | 1.53E-12 | 9.065089 | Up | TEA domain transcription factor 4                                                |
| LOC541471 | 1.678209 | 7.14E-15 | 2.68E-12 | 8.944444 | Up | #N/A                                                                             |
| COL4A2    | 2.519381 | 7.69E-15 | 2.84E-12 | 8.930613 | Up | collagen type IV alpha 2 chain                                                   |
| SDS       | 2.945396 | 9.34E-15 | 3.4E-12  | 8.894271 | Up | serine dehydratase                                                               |
| BMP1      | 2.177414 | 1.56E-14 | 5.06E-12 | 8.798462 | Up | bone morphogenetic protein 1                                                     |
| SPARC     | 2.574807 | 1.56E-14 | 5.06E-12 | 8.798331 | Up | secreted protein acidic and cysteine rich                                        |
| NOP2      | 1.613861 | 1.9E-14  | 6.01E-12 | 8.760938 | Up | NOP2 nucleolar protein                                                           |
| GPNMB     | 2.825201 | 2.18E-14 | 6.62E-12 | 8.735456 | Up | glycoprotein nmb                                                                 |
| RRP12     | 1.670106 | 2.22E-14 | 6.67E-12 | 8.73165  | Up | ribosomal RNA processing 12 homolog                                              |
| THBS2     | 4.303173 | 2.56E-14 | 7.57E-12 | 8.705365 | Up | thrombospondin 2                                                                 |
| COL18A1   | 2.437266 | 4.31E-14 | 1.2E-11  | 8.607211 | Up | collagen type XVIII alpha 1 chain                                                |
| PLXNA1    | 1.662541 | 4.7E-14  | 1.29E-11 | 8.591156 | Up | plexin A1                                                                        |
| RELT      | 1.775325 | 4.93E-14 | 1.3E-11  | 8.582095 | Up | RELT TNF receptor                                                                |
| COL5A2    | 2.509222 | 6.01E-14 | 1.51E-11 | 8.544741 | Up | collagen type V alpha 2 chain                                                    |
| COL6A3    | 3.261072 | 6.35E-14 | 1.57E-11 | 8.534447 | Up | collagen type VI alpha 3 chain                                                   |
| PRRX1     | 3.293988 | 9.59E-14 | 2.2E-11  | 8.456677 | Up | paired related homeobox 1                                                        |
| HAVCR2    | 1.895769 | 1.1E-13  | 2.42E-11 | 8.43141  | Up | hepatitis A virus cellular receptor 2                                            |
| ANGPT2    | 1.886597 | 1.16E-13 | 2.55E-11 | 8.420387 | Up | angiopoietin 2                                                                   |
| CEP170    | 1.820113 | 1.23E-13 | 2.64E-11 | 8.409774 | Up | centrosomal protein 170                                                          |
| ADAMTS2   | 3.15333  | 1.54E-13 | 3.22E-11 | 8.367548 | Up | ADAM metallopeptidase with thrombospondin type 1 motif 2                         |
| COL12A1   | 2.963842 | 1.61E-13 | 3.34E-11 | 8.358832 | Up | collagen type XII alpha 1 chain                                                  |

|              |          |          |          |          |    |                                                                                   |
|--------------|----------|----------|----------|----------|----|-----------------------------------------------------------------------------------|
| MFAP2        | 2.775014 | 1.99E-13 | 3.99E-11 | 8.318485 | Up | microfibril associated protein 2                                                  |
| MMP14        | 1.80734  | 3E-13    | 5.77E-11 | 8.240846 | Up | matrix metalloproteinase 14                                                       |
| FOXP1        | 1.63315  | 3.26E-13 | 6.08E-11 | 8.224703 | Up | forkhead box K1                                                                   |
| PVT1         | 2.137405 | 3.33E-13 | 6.12E-11 | 8.220692 | Up | Pvt1 oncogene                                                                     |
| LEPRE1       | 1.683065 | 3.53E-13 | 6.33E-11 | 8.209775 | Up | Leucine- And Proline-Enriched Proteoglycan 1                                      |
| PLA2G7       | 2.335604 | 3.87E-13 | 6.78E-11 | 8.192344 | Up | phospholipase A2 group VII                                                        |
| CTHRC1       | 2.993366 | 4.44E-13 | 7.73E-11 | 8.166018 | Up | collagen triple helix repeat containing 1                                         |
| TIMP1        | 2.769289 | 4.77E-13 | 8.01E-11 | 8.152381 | Up | TIMP metalloproteinase inhibitor 1                                                |
| PDGFRB       | 2.683245 | 6.53E-13 | 1.01E-10 | 8.092516 | Up | platelet derived growth factor receptor beta                                      |
| LILRB4       | 2.318613 | 7.91E-13 | 1.18E-10 | 8.055983 | Up | leukocyte immunoglobulin like receptor B4                                         |
| TTYH3        | 2.15944  | 1.08E-12 | 1.53E-10 | 7.996266 | Up | tweety family member 3                                                            |
| LOC100505702 | 1.823494 | 1.11E-12 | 1.56E-10 | 7.992044 | Up | #N/A                                                                              |
| LPCAT1       | 1.603274 | 1.19E-12 | 1.67E-10 | 7.9781   | Up | lysophosphatidylcholine acyltransferase 1                                         |
| KIAA1199     | 3.7798   | 1.2E-12  | 1.67E-10 | 7.976353 | Up | Hyaluronan-Binding Protein nucleotide binding oligomerization domain containing 1 |
| NOD1         | 1.812531 | 1.28E-12 | 1.77E-10 | 7.964454 | Up | collagen type I alpha 2 chain                                                     |
| COL1A2       | 3.011069 | 1.53E-12 | 2.05E-10 | 7.930162 | Up | collagen type I alpha 2 chain                                                     |
| KAL1         | 2.529049 | 1.56E-12 | 2.08E-10 | 7.926407 | Up | Kallmann syndrome 1                                                               |
| PGF          | 1.827148 | 1.9E-12  | 2.44E-10 | 7.888251 | Up | placental growth factor                                                           |
| CTSL1        | 1.924328 | 2.02E-12 | 2.57E-10 | 7.876392 | Up | Cathepsin L1                                                                      |
| NOTCH1       | 2.04241  | 2.11E-12 | 2.65E-10 | 7.867689 | Up | notch receptor 1                                                                  |
| MYBBP1A      | 1.56545  | 2.92E-12 | 3.55E-10 | 7.805317 | Up | MYB binding protein 1a                                                            |
| LIF          | 2.628837 | 3.26E-12 | 3.9E-10  | 7.784528 | Up | LIF interleukin 6 family cytokine                                                 |
| MTBP         | 1.566688 | 3.43E-12 | 4.08E-10 | 7.774674 | Up | MDM2 binding protein                                                              |
| PODXL        | 1.678369 | 3.49E-12 | 4.14E-10 | 7.771017 | Up | podocalyxin like                                                                  |
| FCGR2A       | 2.042815 | 4.77E-12 | 5.43E-10 | 7.711092 | Up | Fc fragment of IgG receptor IIa                                                   |
| ASPN         | 3.192313 | 5.69E-12 | 6.33E-10 | 7.67682  | Up | asporin                                                                           |
| MEST         | 2.033002 | 5.91E-12 | 6.5E-10  | 7.669643 | Up | mesoderm specific transcript                                                      |
| IFITM3       | 1.811626 | 6.53E-12 | 7.06E-10 | 7.650202 | Up | interferon induced transmembrane protein 3                                        |
| VASH1        | 1.732625 | 6.94E-12 | 7.36E-10 | 7.638494 | Up | vasohibin 1                                                                       |
| SPSB1        | 1.557471 | 8.5E-12  | 8.63E-10 | 7.599137 | Up | splA/ryanodine receptor domain and SOCS box containing 1                          |
| RAB31        | 1.850995 | 9.07E-12 | 9.06E-10 | 7.586573 | Up | RAB31, member RAS oncogene family                                                 |
| COL1A1       | 3.64102  | 9.22E-12 | 9.17E-10 | 7.5834   | Up | collagen type I alpha 1 chain                                                     |
| KNTC1        | 1.565897 | 1.22E-11 | 1.16E-09 | 7.529552 | Up | kinetochore associated 1                                                          |
| SLC39A10     | 1.680223 | 1.42E-11 | 1.32E-09 | 7.498991 | Up | solute carrier family 39 member 10                                                |
| ACTN1        | 1.677965 | 1.47E-11 | 1.35E-09 | 7.492714 | Up | actinin alpha 1                                                                   |
| TDRD6        | 1.891436 | 1.78E-11 | 1.61E-09 | 7.454971 | Up | tudor domain containing 6                                                         |
| COL5A3       | 2.202227 | 2.01E-11 | 1.77E-09 | 7.431748 | Up | collagen type V alpha 3 chain                                                     |
| SPHK1        | 2.448979 | 2.09E-11 | 1.83E-09 | 7.423857 | Up | sphingosine kinase 1                                                              |
| C5AR1        | 2.091061 | 2.32E-11 | 2E-09    | 7.403032 | Up | complement C5a receptor 1                                                         |
| CTSB         | 1.825225 | 2.34E-11 | 2.01E-09 | 7.401651 | Up | cathepsin B                                                                       |
| SNX10        | 2.172538 | 2.4E-11  | 2.04E-09 | 7.397183 | Up | sorting nexin 10                                                                  |
| CLEC7A       | 1.80967  | 2.58E-11 | 2.17E-09 | 7.382581 | Up | C-type lectin domain containing 7A                                                |

|          |          |          |          |          |    |                                                                                            |
|----------|----------|----------|----------|----------|----|--------------------------------------------------------------------------------------------|
| NFAM1    | 1.853487 | 2.63E-11 | 2.2E-09  | 7.378992 | Up | NFAT activating protein with ITAM motif 1                                                  |
| ABCA1    | 1.719536 | 2.79E-11 | 2.29E-09 | 7.367414 | Up | ATP binding cassette subfamily A member 1                                                  |
| EMILIN2  | 1.553408 | 3.15E-11 | 2.52E-09 | 7.343301 | Up | elastin microfibrillarinterfacer 2                                                         |
| WDR62    | 1.957436 | 3.83E-11 | 2.98E-09 | 7.304983 | Up | WD repeat domain 62                                                                        |
| RAI14    | 1.601279 | 4.4E-11  | 3.32E-09 | 7.277967 | Up | retinoic acid induced 14<br>piezo type mechanosensitive ion channel<br>component 1         |
| PIEZO1   | 1.74628  | 4.6E-11  | 3.41E-09 | 7.269156 | Up |                                                                                            |
| SERPINE1 | 2.947958 | 4.94E-11 | 3.61E-09 | 7.254962 | Up | serpin family E member 1                                                                   |
| BMP8A    | 2.229521 | 5.55E-11 | 3.95E-09 | 7.232267 | Up | bone morphogenetic protein 8a                                                              |
| NOTCH3   | 2.452432 | 5.96E-11 | 4.21E-09 | 7.21815  | Up | notch receptor 3                                                                           |
| NCF2     | 1.870599 | 6.03E-11 | 4.23E-09 | 7.215631 | Up | neutrophil cytosolic factor 2                                                              |
| TGFBI    | 1.984846 | 6.52E-11 | 4.55E-09 | 7.200364 | Up | transforming growth factor beta induced                                                    |
| CD300LF  | 1.757513 | 6.72E-11 | 4.63E-09 | 7.194229 | Up | CD300 molecule like family member f                                                        |
| PRKDC    | 1.608728 | 7.13E-11 | 4.81E-09 | 7.182665 | Up | protein kinase, DNA-activated, catalytic subunit                                           |
| DUSP10   | 1.667554 | 7.38E-11 | 4.91E-09 | 7.175931 | Up | dual specificity phosphatase 10                                                            |
| IFFO2    | 1.573573 | 7.81E-11 | 5.15E-09 | 7.164643 | Up | intermediate filament family orphan 2                                                      |
| FSTL1    | 2.16055  | 7.95E-11 | 5.23E-09 | 7.161207 | Up | follistatin like 1                                                                         |
| ST3GAL2  | 1.575122 | 8.61E-11 | 5.62E-09 | 7.145338 | Up | ST3 beta-galactoside alpha-2,3-sialyltransferase 2                                         |
| TRIO     | 1.628151 | 8.67E-11 | 5.64E-09 | 7.143936 | Up | trio Rho guanine nucleotide exchange factor                                                |
| F2R      | 2.096849 | 9.01E-11 | 5.81E-09 | 7.136385 | Up | coagulation factor II thrombin receptor                                                    |
| PLXNC1   | 1.778859 | 9.55E-11 | 6.11E-09 | 7.124841 | Up | plexin C1                                                                                  |
| HAPLN3   | 2.194557 | 9.62E-11 | 6.14E-09 | 7.123387 | Up | hyaluronan and proteoglycan link protein 3                                                 |
| FN1      | 3.278172 | 9.82E-11 | 6.25E-09 | 7.119179 | Up | fibronectin 1                                                                              |
| RCN3     | 2.200572 | 9.88E-11 | 6.26E-09 | 7.118011 | Up | reticulocalbin 3                                                                           |
| ATAD5    | 1.68341  | 1.05E-10 | 6.6E-09  | 7.105167 | Up | ATPase family AAA domain containing 5<br>minichromosome maintenance complex component<br>7 |
| MCM7     | 1.670101 | 1.3E-10  | 7.87E-09 | 7.063095 | Up |                                                                                            |
| IER5L    | 1.897802 | 1.34E-10 | 7.95E-09 | 7.058115 | Up | immediate early response 5 like                                                            |
| DOCK4    | 1.670651 | 1.34E-10 | 7.95E-09 | 7.057479 | Up | dedicator of cytokinesis 4                                                                 |
| BOP1     | 1.707862 | 1.4E-10  | 8.24E-09 | 7.048991 | Up | BOP1 ribosomal biogenesis factor                                                           |
| MDFI     | 1.827513 | 1.46E-10 | 8.57E-09 | 7.040197 | Up | MyoD family inhibitor                                                                      |
| EPHB2    | 3.171361 | 1.63E-10 | 9.34E-09 | 7.018777 | Up | EPH receptor B2                                                                            |
| GAL3ST4  | 1.84346  | 1.63E-10 | 9.35E-09 | 7.018003 | Up | galactose-3-O-sulfotransferase 4                                                           |
| RHBDF2   | 1.570682 | 1.8E-10  | 1.01E-08 | 6.998712 | Up | rhomboid 5 homolog 2                                                                       |
| KCNAB2   | 1.645556 | 1.93E-10 | 1.06E-08 | 6.98504  | Up | potassium voltage-gated channel subfamily A<br>regulatory beta subunit 2                   |
| CLDN7    | 3.228188 | 1.99E-10 | 1.09E-08 | 6.979206 | Up | claudin 7                                                                                  |
| PMEP1    | 2.347479 | 2.02E-10 | 1.1E-08  | 6.975423 | Up | prostate transmembrane protein, androgen induced<br>1                                      |
| ILDR1    | 1.930265 | 2.03E-10 | 1.1E-08  | 6.975195 | Up | immunoglobulin like domain containing receptor 1                                           |
| RFTN1    | 1.824451 | 2.07E-10 | 1.11E-08 | 6.971295 | Up | raftlin, lipid raft linker 1                                                               |
| ENC1     | 1.605404 | 2.1E-10  | 1.12E-08 | 6.968068 | Up | ectodermal-neural cortex 1                                                                 |
| FCHO1    | 1.699355 | 2.22E-10 | 1.18E-08 | 6.956621 | Up | FCH and mu domain containing endocytic adaptor<br>1                                        |
| ENTPD1   | 1.602404 | 2.33E-10 | 1.23E-08 | 6.946888 | Up | ectonucleoside triphosphate diphosphohydrolase 1                                           |
| SFRP4    | 4.658162 | 2.47E-10 | 1.28E-08 | 6.935666 | Up | secreted frizzled related protein 4                                                        |
| SEMA6B   | 1.802608 | 2.5E-10  | 1.3E-08  | 6.932809 | Up | semaphorin 6B                                                                              |

|            |          |          |          |          |    |                                                                                                          |
|------------|----------|----------|----------|----------|----|----------------------------------------------------------------------------------------------------------|
| FGD6       | 1.724331 | 2.62E-10 | 1.34E-08 | 6.923574 | Up | FYVE, RhoGEF and PH domain containing 6 leucine rich repeat and fibronectin type III domain containing 4 |
| LRFN4      | 1.744418 | 2.94E-10 | 1.47E-08 | 6.90061  | Up |                                                                                                          |
| LRP8       | 2.29507  | 3.15E-10 | 1.55E-08 | 6.886442 | Up | LDL receptor related protein 8                                                                           |
| ESM1       | 2.497572 | 3.45E-10 | 1.68E-08 | 6.868734 | Up | endothelial cell specific molecule 1                                                                     |
| LAPTM5     | 1.683259 | 3.6E-10  | 1.74E-08 | 6.859677 | Up | lysosomal protein transmembrane 5                                                                        |
| ABCD1      | 1.57295  | 3.84E-10 | 1.83E-08 | 6.847189 | Up | ATP binding cassette subfamily D member 1                                                                |
| CLDN1      | 3.716278 | 4.19E-10 | 1.97E-08 | 6.829177 | Up | claudin 1                                                                                                |
| P4HA3      | 1.997044 | 4.63E-10 | 2.12E-08 | 6.809425 | Up | prolyl 4-hydroxylase subunit alpha 3                                                                     |
| RAD54L     | 1.729109 | 4.79E-10 | 2.18E-08 | 6.802366 | Up | RAD54 like                                                                                               |
| CDH11      | 2.246797 | 4.9E-10  | 2.22E-08 | 6.797743 | Up | cadherin 11                                                                                              |
| CENPF      | 2.020875 | 4.95E-10 | 2.24E-08 | 6.795601 | Up | centromere protein F                                                                                     |
| CCR1       | 1.679479 | 5.01E-10 | 2.26E-08 | 6.793304 | Up | C-C motif chemokine receptor 1                                                                           |
| CDH13      | 1.816279 | 5.19E-10 | 2.32E-08 | 6.786121 | Up | cadherin 13                                                                                              |
| SPON2      | 2.178941 | 5.21E-10 | 2.32E-08 | 6.785554 | Up | spondin 2                                                                                                |
| KIF18B     | 1.857397 | 5.6E-10  | 2.43E-08 | 6.770716 | Up | kinesin family member 18B                                                                                |
| CHN1       | 1.770805 | 6.24E-10 | 2.65E-08 | 6.749164 | Up | chimerin 1                                                                                               |
| PKMYT1     | 1.848328 | 6.3E-10  | 2.67E-08 | 6.747231 | Up | protein kinase, membrane associated tyrosine/threonine 1                                                 |
| KIF23      | 1.815158 | 6.4E-10  | 2.7E-08  | 6.744026 | Up | kinesin family member 23                                                                                 |
| GPR176     | 1.72814  | 6.48E-10 | 2.72E-08 | 6.741355 | Up | G protein-coupled receptor 176                                                                           |
| KIAA1524   | 1.707069 | 6.81E-10 | 2.83E-08 | 6.731287 | Up | cancerous inhibitor of PP2A                                                                              |
| TRIP13     | 1.765499 | 7.2E-10  | 2.95E-08 | 6.720174 | Up | thyroid hormone receptor interactor 13                                                                   |
| FNDC1      | 4.01704  | 7.25E-10 | 2.96E-08 | 6.718633 | Up | fibronectin type III domain containing 1                                                                 |
| FMNL3      | 1.625477 | 7.67E-10 | 3.11E-08 | 6.707091 | Up | formin like 3                                                                                            |
| FANCD2     | 1.56858  | 7.7E-10  | 3.11E-08 | 6.706407 | Up | FA complementation group D2                                                                              |
| PLBD2      | 1.57102  | 7.73E-10 | 3.12E-08 | 6.705521 | Up | phospholipase B domain containing 2                                                                      |
| SULF2      | 1.885993 | 8.06E-10 | 3.22E-08 | 6.697174 | Up | sulfatase 2                                                                                              |
| SPP1       | 4.420367 | 8.14E-10 | 3.25E-08 | 6.695265 | Up | secreted phosphoprotein 1                                                                                |
| DYSF       | 1.749917 | 8.65E-10 | 3.41E-08 | 6.682716 | Up | dysferlin                                                                                                |
| THBS1      | 2.403719 | 8.93E-10 | 3.48E-08 | 6.676436 | Up | thrombospondin 1                                                                                         |
| OLFML2B    | 2.620057 | 8.99E-10 | 3.49E-08 | 6.675031 | Up | olfactomedin like 2B                                                                                     |
| SLC43A3    | 1.772551 | 9.03E-10 | 3.49E-08 | 6.674004 | Up | solute carrier family 43 member 3                                                                        |
| ATAD2      | 1.726658 | 9.09E-10 | 3.51E-08 | 6.672638 | Up | ATPase family AAA domain containing 2                                                                    |
| UPP1       | 1.604403 | 9.23E-10 | 3.55E-08 | 6.669603 | Up | uridinephosphorylase 1                                                                                   |
| XRCC2      | 1.560921 | 9.32E-10 | 3.58E-08 | 6.667543 | Up | X-ray repair cross complementing 2                                                                       |
| KIF14      | 1.850539 | 9.89E-10 | 3.78E-08 | 6.655614 | Up | kinesin family member 14                                                                                 |
| COL3A1     | 2.576945 | 1E-09    | 3.82E-08 | 6.653135 | Up | collagen type III alpha 1 chain                                                                          |
| CSGALNACT2 | 1.571169 | 1.01E-09 | 3.85E-08 | 6.651072 | Up | chondroitin sulfate N-acetylgalactosaminyltransferase 2                                                  |
| IGFBP7     | 2.014261 | 1.03E-09 | 3.91E-08 | 6.647011 | Up | insulin like growth factor binding protein 7                                                             |
| ARMC9      | 1.606979 | 1.12E-09 | 4.17E-08 | 6.630646 | Up | armadillo repeat containing 9                                                                            |
| CDC25B     | 1.734181 | 1.14E-09 | 4.24E-08 | 6.625943 | Up | cell division cycle 25B                                                                                  |
| GNB4       | 1.564483 | 1.16E-09 | 4.29E-08 | 6.622715 | Up | G protein subunit beta 4                                                                                 |
| FCGR3A     | 2.185483 | 1.2E-09  | 4.39E-08 | 6.615553 | Up | Fc fragment of IgG receptor IIIa                                                                         |

|              |          |          |          |          |    |                                                                   |
|--------------|----------|----------|----------|----------|----|-------------------------------------------------------------------|
| ARHGAP39     | 1.765533 | 1.22E-09 | 4.44E-08 | 6.612702 | Up | Rho GTPase activating protein 39                                  |
| SH3PXD2B     | 1.878221 | 1.28E-09 | 4.62E-08 | 6.602918 | Up | SH3 and PX domains 2B                                             |
| BUB1B        | 1.722101 | 1.35E-09 | 4.82E-08 | 6.592167 | Up | BUB1 mitotic checkpoint serine/threonine kinase B                 |
| ACAN         | 2.742413 | 1.41E-09 | 4.98E-08 | 6.582618 | Up | aggrecan                                                          |
| MARVELD1     | 1.670593 | 1.52E-09 | 5.28E-08 | 6.567303 | Up | MARVEL domain containing 1                                        |
| SLC1A3       | 2.022669 | 1.61E-09 | 5.55E-08 | 6.556542 | Up | solute carrier family 1 member 3                                  |
| PIK3AP1      | 1.62924  | 1.65E-09 | 5.67E-08 | 6.550842 | Up | phosphoinositide-3-kinase adaptor protein 1                       |
| CKAP2        | 1.553455 | 1.68E-09 | 5.74E-08 | 6.547273 | Up | cytoskeleton associated protein 2                                 |
| SLC37A2      | 1.734597 | 1.8E-09  | 6.06E-08 | 6.532982 | Up | solute carrier family 37 member 2                                 |
| PDPN         | 2.041864 | 1.84E-09 | 6.15E-08 | 6.528961 | Up | podoplanin                                                        |
| ADAM12       | 2.395205 | 1.91E-09 | 6.31E-08 | 6.520854 | Up | ADAM metallopeptidase domain 12                                   |
| C1QTNF6      | 1.701272 | 1.97E-09 | 6.49E-08 | 6.514985 | Up | C1q and TNF related 6                                             |
| COL7A1       | 2.892737 | 2.19E-09 | 7.09E-08 | 6.493046 | Up | collagen type VII alpha 1 chain                                   |
| CCNF         | 1.591779 | 2.19E-09 | 7.09E-08 | 6.492753 | Up | cyclin F                                                          |
| CLSPN        | 1.754245 | 2.23E-09 | 7.2E-08  | 6.48898  | Up | claspin                                                           |
| ATP11A       | 1.733479 | 2.33E-09 | 7.44E-08 | 6.480717 | Up | ATPase phospholipid transporting 11A                              |
| CHTF18       | 1.562715 | 2.37E-09 | 7.55E-08 | 6.477173 | Up | chromosome transmission fidelity factor 18                        |
| LCP2         | 1.563638 | 2.37E-09 | 7.55E-08 | 6.476875 | Up | lymphocyte cytosolic protein 2                                    |
| HEYL         | 2.589415 | 2.47E-09 | 7.8E-08  | 6.467962 | Up | hes related family bHLH transcription factor with YRPW motif like |
| NNMT         | 2.291847 | 2.77E-09 | 8.65E-08 | 6.44469  | Up | nicotinamide N-methyltransferase                                  |
| IGSF6        | 1.701301 | 2.79E-09 | 8.69E-08 | 6.443287 | Up | immunoglobulin superfamily member 6                               |
| BUB1         | 1.787001 | 2.83E-09 | 8.8E-08  | 6.439972 | Up | BUB1 mitotic checkpoint serine/threonine kinase                   |
| RECQL4       | 1.873814 | 3.36E-09 | 1.01E-07 | 6.404925 | Up | RecQ like helicase 4                                              |
| C11orf82     | 1.643213 | 3.61E-09 | 1.08E-07 | 6.390004 | Up | Chromosome 11 Open Reading Frame 82                               |
| LOC100288637 | 1.570791 | 3.74E-09 | 1.12E-07 | 6.382551 | Up | OTU deubiquitinase 7A pseudogene                                  |
| NCAPH        | 1.598637 | 4.26E-09 | 1.24E-07 | 6.355631 | Up | non-SMC condensin I complex subunit H                             |
| OSMR         | 1.821329 | 4.29E-09 | 1.25E-07 | 6.354286 | Up | oncostatin M receptor                                             |
| LZTS1        | 2.266255 | 4.34E-09 | 1.26E-07 | 6.351682 | Up | leucine zipper tumor suppressor 1                                 |
| KIAA1274     | 1.713015 | 4.46E-09 | 1.29E-07 | 6.345972 | Up | Phosphatase Domain Containing Paladin 1                           |
| SLC11A1      | 2.285848 | 4.51E-09 | 1.3E-07  | 6.343859 | Up | solute carrier family 11 member 1                                 |
| STIL         | 1.715736 | 4.68E-09 | 1.34E-07 | 6.336072 | Up | STIL centriolar assembly protein                                  |
| C15orf42     | 1.947609 | 4.82E-09 | 1.37E-07 | 6.329813 | Up | chromosome 15 open reading frame 42                               |
| KIF4A        | 1.725143 | 4.88E-09 | 1.39E-07 | 6.327425 | Up | kinesin family member 4A                                          |
| GPR161       | 1.690141 | 4.94E-09 | 1.4E-07  | 6.324796 | Up | G protein-coupled receptor 161                                    |
| P2RX7        | 1.582058 | 5.01E-09 | 1.41E-07 | 6.321892 | Up | purinergic receptor P2X 7                                         |
| CDCA5        | 1.864053 | 5.03E-09 | 1.41E-07 | 6.321119 | Up | cell division cycle associated 5                                  |
| CLEC5A       | 1.99045  | 5.18E-09 | 1.45E-07 | 6.315142 | Up | C-type lectin domain containing 5A                                |
| KIF26B       | 2.186482 | 5.3E-09  | 1.48E-07 | 6.310447 | Up | kinesin family member 26B                                         |
| TFEC         | 1.566971 | 5.52E-09 | 1.53E-07 | 6.301734 | Up | transcription factor EC                                           |
| EXO1         | 1.67768  | 5.78E-09 | 1.58E-07 | 6.29207  | Up | exonuclease 1                                                     |
| TUBB3        | 2.236373 | 5.92E-09 | 1.61E-07 | 6.287251 | Up | tubulin beta 3 class III                                          |
| CASC5        | 1.652782 | 6.12E-09 | 1.65E-07 | 6.280163 | Up | kinetochore scaffold 1                                            |



|           |          |          |          |          |    |                                                               |
|-----------|----------|----------|----------|----------|----|---------------------------------------------------------------|
| TPX2      | 1.930431 | 6.29E-09 | 1.69E-07 | 6.274712 | Up | TPX2 microtubule nucleation factor                            |
| POLQ      | 1.819336 | 6.84E-09 | 1.81E-07 | 6.257122 | Up | DNA polymerase theta                                          |
| RGS1      | 2.049497 | 7.19E-09 | 1.87E-07 | 6.246677 | Up | regulator of G protein signaling 1                            |
| EDNRA     | 1.856733 | 7.22E-09 | 1.88E-07 | 6.245851 | Up | endothelin receptor type A                                    |
| ITGA5     | 1.716856 | 7.64E-09 | 1.97E-07 | 6.233848 | Up | integrin subunit alpha 5                                      |
| PRR5L     | 1.676315 | 7.72E-09 | 1.98E-07 | 6.231668 | Up | proline rich 5 like                                           |
| PLXDC2    | 2.054708 | 7.76E-09 | 1.98E-07 | 6.230814 | Up | plexin domain containing 2                                    |
| FAM26E    | 1.758127 | 8.22E-09 | 2.07E-07 | 6.21852  | Up | Calcium Homeostasis Modulator Family Member 5                 |
| KIF20A    | 1.597958 | 8.41E-09 | 2.11E-07 | 6.213917 | Up | kinesin family member 20A                                     |
| PLAU      | 1.923316 | 8.99E-09 | 2.24E-07 | 6.199773 | Up | plasminogen activator, urokinase                              |
| KIRREL    | 1.859596 | 9.32E-09 | 2.32E-07 | 6.192213 | Up | Kirre Like Nephrin Family Adhesion Molecule 1                 |
| KIF21B    | 1.572691 | 9.79E-09 | 2.41E-07 | 6.181902 | Up | kinesin family member 21B                                     |
| FKBP10    | 2.18757  | 1E-08    | 2.45E-07 | 6.17754  | Up | FKBP prolyl isomerase 10                                      |
| RTKN2     | 1.676019 | 1.05E-08 | 2.55E-07 | 6.16672  | Up | rhotekin 2                                                    |
| MRC2      | 2.049876 | 1.15E-08 | 2.76E-07 | 6.147734 | Up | mannose receptor C type 2                                     |
| PVRL1     | 1.725234 | 1.16E-08 | 2.76E-07 | 6.146977 | Up | Poliovirus receptor-related 1                                 |
| LEF1      | 1.927508 | 1.22E-08 | 2.88E-07 | 6.13553  | Up | lymphoid enhancer binding factor 1                            |
| LILRB3    | 1.673521 | 1.24E-08 | 2.92E-07 | 6.13191  | Up | leukocyte immunoglobulin like receptor B3                     |
| EMR2      | 1.578167 | 1.28E-08 | 2.99E-07 | 6.125181 | Up | EGF-like module-containing mucin-like hormone receptor-like 2 |
| COL15A1   | 1.883791 | 1.35E-08 | 3.13E-07 | 6.114452 | Up | collagen type XV alpha 1 chain                                |
| PLEKHG2   | 1.80988  | 1.35E-08 | 3.13E-07 | 6.113741 | Up | pleckstrin homology and RhoGEF domain containing G2           |
| PDLIM7    | 1.740568 | 1.38E-08 | 3.18E-07 | 6.109095 | Up | PDZ and LIM domain 7                                          |
| HTRA3     | 2.032862 | 1.4E-08  | 3.21E-07 | 6.10624  | Up | HtrA serine peptidase 3                                       |
| COL5A1    | 2.251397 | 1.41E-08 | 3.21E-07 | 6.105813 | Up | collagen type V alpha 1 chain                                 |
| FSCN1     | 1.859536 | 1.6E-08  | 3.58E-07 | 6.078685 | Up | fascin actin-bundling protein 1                               |
| CPZ       | 2.709031 | 1.6E-08  | 3.58E-07 | 6.078232 | Up | carboxypeptidase Z                                            |
| PILRA     | 1.639131 | 1.64E-08 | 3.66E-07 | 6.072697 | Up | paired immunoglobulin like type 2 receptor alpha              |
| NOX4      | 2.17837  | 1.68E-08 | 3.74E-07 | 6.067524 | Up | NADPH oxidase 4                                               |
| COL10A1   | 3.294663 | 1.69E-08 | 3.74E-07 | 6.066712 | Up | collagen type X alpha 1 chain                                 |
| CDCA7     | 1.873706 | 1.7E-08  | 3.74E-07 | 6.066149 | Up | cell division cycle associated 7                              |
| GUCY1B3   | 1.714941 | 1.75E-08 | 3.84E-07 | 6.058799 | Up | Guanylatecyclase soluble subunit beta-1                       |
| FCGR1A    | 1.550648 | 1.8E-08  | 3.92E-07 | 6.053685 | Up | Fc fragment of IgG receptor Ia                                |
| CRISPLD1  | 2.840034 | 1.87E-08 | 4.06E-07 | 6.045375 | Up | cysteine rich secretory protein LCCL domain containing 1      |
| PGM2L1    | 1.604202 | 1.89E-08 | 4.08E-07 | 6.043469 | Up | phosphoglucomutase 2 like 1                                   |
| HJURP     | 1.660521 | 1.9E-08  | 4.09E-07 | 6.042214 | Up | Holliday junction recognition protein                         |
| MCM2      | 1.610827 | 1.9E-08  | 4.1E-07  | 6.041763 | Up | minichromosome maintenance complex component 2                |
| EPPK1     | 2.121199 | 1.97E-08 | 4.21E-07 | 6.034651 | Up | epiplakin 1                                                   |
| LRRC32    | 2.114457 | 1.98E-08 | 4.23E-07 | 6.03315  | Up | leucine rich repeat containing 32                             |
| GINS4     | 1.554033 | 2.01E-08 | 4.28E-07 | 6.030407 | Up | GINS complex subunit 4                                        |
| CD84      | 1.610976 | 2.02E-08 | 4.3E-07  | 6.029305 | Up | CD84 molecule                                                 |
| VCAN      | 2.144966 | 2.03E-08 | 4.33E-07 | 6.027469 | Up | versican                                                      |
| ARHGAP11A | 1.630033 | 2.09E-08 | 4.44E-07 | 6.021732 | Up | Rho GTPase activating protein 11A                             |

|          |          |          |          |          |    |                                                                                            |
|----------|----------|----------|----------|----------|----|--------------------------------------------------------------------------------------------|
| SLC2A3   | 1.845064 | 2.14E-08 | 4.52E-07 | 6.016445 | Up | solute carrier family 2 member 3                                                           |
| FOXM1    | 1.797631 | 2.19E-08 | 4.6E-07  | 6.012159 | Up | forkhead box M1                                                                            |
| ORC1     | 1.553737 | 2.2E-08  | 4.62E-07 | 6.010844 | Up | origin recognition complex subunit 1                                                       |
| TNFAIP2  | 1.893301 | 2.33E-08 | 4.84E-07 | 5.998857 | Up | TNF alpha induced protein 2                                                                |
| ADAMTS4  | 1.862137 | 2.39E-08 | 4.93E-07 | 5.993264 | Up | ADAM metalloproteinase with thrombospondin type 1 motif 4                                  |
| SERPINB9 | 1.76002  | 2.45E-08 | 5.01E-07 | 5.9883   | Up | serpin family B member 9                                                                   |
| OLR1     | 2.216021 | 2.64E-08 | 5.36E-07 | 5.972109 | Up | oxidized low density lipoprotein receptor 1                                                |
| FSTL3    | 1.861555 | 2.7E-08  | 5.45E-07 | 5.966959 | Up | follistatin like 3                                                                         |
| LOXL2    | 1.628413 | 2.84E-08 | 5.66E-07 | 5.956474 | Up | lysyl oxidase like 2                                                                       |
| KIF2C    | 1.696056 | 2.86E-08 | 5.7E-07  | 5.954899 | Up | kinesin family member 2C                                                                   |
| FOXS1    | 1.848254 | 3E-08    | 5.91E-07 | 5.944636 | Up | forkhead box S1                                                                            |
| ANKRD13B | 1.557613 | 3.1E-08  | 6.08E-07 | 5.937383 | Up | ankyrin repeat domain 13B                                                                  |
| GUCY1A3  | 2.333005 | 3.12E-08 | 6.1E-07  | 5.936473 | Up | Guanylatecyclase soluble subunit alpha-3                                                   |
| ZAK      | 1.552581 | 3.16E-08 | 6.15E-07 | 5.933546 | Up | Sterile alpha motif and leucine zipper containing kinase AZK                               |
| ITGA11   | 2.068155 | 3.25E-08 | 6.3E-07  | 5.927286 | Up | integrin subunit alpha 11                                                                  |
| ICAM1    | 1.944005 | 3.74E-08 | 7.03E-07 | 5.897156 | Up | intercellular adhesion molecule 1                                                          |
| PXDN     | 1.618901 | 4.16E-08 | 7.66E-07 | 5.874542 | Up | peroxidase                                                                                 |
| ODF2L    | 1.618387 | 4.25E-08 | 7.8E-07  | 5.869993 | Up | outer dense fiber of sperm tails 2 like                                                    |
| ASPM     | 1.759881 | 4.28E-08 | 7.83E-07 | 5.868482 | Up | abnormal spindle microtubule assembly GTP binding protein overexpressed in skeletal muscle |
| GEM      | 1.935598 | 4.58E-08 | 8.31E-07 | 5.853538 | Up |                                                                                            |
| GPX8     | 1.574781 | 4.62E-08 | 8.36E-07 | 5.852054 | Up | glutathione peroxidase 8 (putative)                                                        |
| APOC1    | 2.532428 | 4.78E-08 | 8.6E-07  | 5.844346 | Up | apolipoprotein C1                                                                          |
| CSF3R    | 2.319103 | 5.28E-08 | 9.29E-07 | 5.823068 | Up | colony stimulating factor 3 receptor                                                       |
| TMEM158  | 1.64545  | 5.67E-08 | 9.86E-07 | 5.807673 | Up | transmembrane protein 158 (gene/pseudogene)                                                |
| ZNF469   | 2.064601 | 5.91E-08 | 1.02E-06 | 5.798504 | Up | zinc finger protein 469                                                                    |
| PLXDC1   | 1.737904 | 6.08E-08 | 1.05E-06 | 5.79242  | Up | plexin domain containing 1                                                                 |
| PIK3R5   | 1.553293 | 6.25E-08 | 1.07E-06 | 5.78673  | Up | phosphoinositide-3-kinase regulatory subunit 5                                             |
| DGKH     | 1.612376 | 6.55E-08 | 1.12E-06 | 5.77644  | Up | diacylglycerol kinase eta                                                                  |
| FADS2    | 1.657975 | 7.05E-08 | 1.18E-06 | 5.760527 | Up | fatty acid desaturase 2                                                                    |
| FGR      | 1.579559 | 7.16E-08 | 1.2E-06  | 5.757077 | Up | FGR proto-oncogene, Src family tyrosine kinase                                             |
| LIPG     | 2.049762 | 7.36E-08 | 1.23E-06 | 5.751138 | Up | lipase G, endothelial type                                                                 |
| SERPINE2 | 2.202612 | 7.53E-08 | 1.25E-06 | 5.74608  | Up | serpin family E member 2                                                                   |
| MMP11    | 2.952133 | 7.63E-08 | 1.26E-06 | 5.743236 | Up | matrix metalloproteinase 11                                                                |
| MCM10    | 1.774936 | 7.71E-08 | 1.27E-06 | 5.741063 | Up | minichromosome maintenance 10 replication initiation factor                                |
| APOE     | 2.254187 | 7.79E-08 | 1.28E-06 | 5.738793 | Up | apolipoprotein E                                                                           |
| NEK2     | 1.692854 | 7.85E-08 | 1.29E-06 | 5.737093 | Up | NIMA related kinase 2                                                                      |
| CDCA2    | 1.668033 | 8.29E-08 | 1.35E-06 | 5.725122 | Up | cell division cycle associated 2                                                           |
| IQGAP3   | 1.733444 | 8.51E-08 | 1.38E-06 | 5.719417 | Up | IQ motif containing GTPase activating protein 3                                            |
| CALD1    | 1.71965  | 8.94E-08 | 1.44E-06 | 5.708809 | Up | caldesmon 1                                                                                |
| CBX2     | 1.867374 | 1.01E-07 | 1.6E-06  | 5.683057 | Up | chromobox 2                                                                                |
| FAR2     | 1.571986 | 1.04E-07 | 1.64E-06 | 5.674834 | Up | fatty acyl-CoA reductase 2                                                                 |
| NTM      | 1.953707 | 1.05E-07 | 1.64E-06 | 5.674553 | Up | neurotrimin                                                                                |

|           |          |          |          |          |    |                                                                 |
|-----------|----------|----------|----------|----------|----|-----------------------------------------------------------------|
| AMIGO2    | 1.75988  | 1.16E-07 | 1.78E-06 | 5.65216  | Up | adhesion molecule with Ig like domain 2                         |
| WNT2      | 2.404356 | 1.2E-07  | 1.84E-06 | 5.644602 | Up | Wnt family member 2                                             |
| GRIN2D    | 2.307741 | 1.27E-07 | 1.93E-06 | 5.63168  | Up | glutamate ionotropic receptor NMDA type subunit 2D              |
| MKI67     | 1.710561 | 1.32E-07 | 1.99E-06 | 5.623865 | Up | marker of proliferation Ki-67                                   |
| LINC00340 | 1.704574 | 1.37E-07 | 2.06E-06 | 5.614696 | Up | #N/A                                                            |
| ETV4      | 2.243602 | 1.39E-07 | 2.08E-06 | 5.611977 | Up | ETS variant transcription factor 4                              |
| AJUBA     | 1.785348 | 1.51E-07 | 2.22E-06 | 5.593443 | Up | ajuba LIM protein                                               |
| ANLN      | 1.750152 | 1.58E-07 | 2.31E-06 | 5.584125 | Up | anillin actin binding protein                                   |
| PARVG     | 1.560826 | 1.64E-07 | 2.38E-06 | 5.575666 | Up | parvin gamma                                                    |
| ADAMTS14  | 2.019487 | 1.66E-07 | 2.41E-06 | 5.573088 | Up | ADAM metalloproteinase with thrombospondin type 1 motif 14      |
| PLK1      | 1.552472 | 1.72E-07 | 2.47E-06 | 5.564603 | Up | polo like kinase 1                                              |
| PLEK      | 1.606253 | 1.74E-07 | 2.5E-06  | 5.562167 | Up | pleckstrin                                                      |
| LUM       | 2.195011 | 1.98E-07 | 2.78E-06 | 5.533808 | Up | lumican                                                         |
| SRPX2     | 1.666163 | 2.03E-07 | 2.83E-06 | 5.528704 | Up | sushi repeat containing protein X-linked 2                      |
| ONECUT2   | 3.067256 | 2.04E-07 | 2.84E-06 | 5.527044 | Up | one cut homeobox 2                                              |
| BICC1     | 2.129691 | 2.11E-07 | 2.91E-06 | 5.520162 | Up | BicC family RNA binding protein 1                               |
| KLHL29    | 1.658014 | 2.13E-07 | 2.94E-06 | 5.517367 | Up | kelch like family member 29                                     |
| H19       | 3.375443 | 2.25E-07 | 3.07E-06 | 5.505067 | Up | H19 imprinted maternally expressed transcript                   |
| TGM2      | 2.005721 | 2.28E-07 | 3.1E-06  | 5.502485 | Up | transglutaminase 2                                              |
| FCER1G    | 1.567203 | 2.36E-07 | 3.19E-06 | 5.494477 | Up | Fc fragment of IgE receptor Ig                                  |
| ZNF462    | 1.8336   | 2.43E-07 | 3.26E-06 | 5.488355 | Up | zinc finger protein 462                                         |
| CLSTN3    | 1.589208 | 2.66E-07 | 3.53E-06 | 5.467758 | Up | calsyntenin 3                                                   |
| CD248     | 1.816546 | 2.7E-07  | 3.57E-06 | 5.464493 | Up | CD248 molecule                                                  |
| NT5DC3    | 1.656425 | 2.79E-07 | 3.67E-06 | 5.457673 | Up | 5'-nucleotidase domain containing 3                             |
| GDPD5     | 1.706172 | 2.79E-07 | 3.67E-06 | 5.457168 | Up | glycerophosphodiesterphosphodiesterase domain containing 5      |
| FBN1      | 2.205815 | 2.84E-07 | 3.72E-06 | 5.453361 | Up | fibrillin 1                                                     |
| ATP10A    | 1.594819 | 2.85E-07 | 3.73E-06 | 5.452813 | Up | ATPase phospholipid transporting 10A (putative)                 |
| STC2      | 1.637092 | 2.87E-07 | 3.75E-06 | 5.451086 | Up | stanniocalcin 2                                                 |
| OSR2      | 1.919816 | 2.91E-07 | 3.81E-06 | 5.447658 | Up | odd-skipped related transcription factor 2                      |
| ANGPTL2   | 1.741942 | 2.93E-07 | 3.82E-06 | 5.446431 | Up | angiopoietin like 2                                             |
| LY6E      | 1.958299 | 3.06E-07 | 3.97E-06 | 5.436569 | Up | lymphocyte antigen 6 family member E                            |
| CPXM1     | 2.38795  | 3.15E-07 | 4.07E-06 | 5.430499 | Up | carboxypeptidase X, M14 family member 1                         |
| SPOCK1    | 2.423261 | 3.27E-07 | 4.2E-06  | 5.421649 | Up | SPARC (osteonectin), cwcv and kazal like domains proteoglycan 1 |
| TOP2A     | 1.727058 | 3.36E-07 | 4.28E-06 | 5.415637 | Up | DNA topoisomerase II alpha                                      |
| ESPL1     | 1.596797 | 3.77E-07 | 4.71E-06 | 5.390156 | Up | extra spindle pole bodies like 1, separase                      |
| LPPR4     | 1.994093 | 3.83E-07 | 4.79E-06 | 5.3865   | Up | Lipid phosphate phosphatase-related protein type 4.             |
| CDC6      | 1.641411 | 3.88E-07 | 4.84E-06 | 5.383599 | Up | cell division cycle 6                                           |
| MXRA5     | 1.903509 | 4E-07    | 4.95E-06 | 5.376656 | Up | matrix remodeling associated 5                                  |
| KIAA1755  | 1.931666 | 4.06E-07 | 5.02E-06 | 5.373205 | Up | KIAA1755                                                        |
| ISLR      | 2.226024 | 4.45E-07 | 5.44E-06 | 5.352365 | Up | immunoglobulin superfamily containing leucine rich repeat       |
| RARRES1   | 2.14138  | 4.53E-07 | 5.5E-06  | 5.348611 | Up | retinoic acid receptor responder 1                              |
| CTSK      | 2.028253 | 4.61E-07 | 5.58E-06 | 5.344477 | Up | cathepsin K                                                     |

|           |          |          |          |          |    |                                                                                          |
|-----------|----------|----------|----------|----------|----|------------------------------------------------------------------------------------------|
| ANTXR1    | 1.960624 | 5.03E-07 | 6E-06    | 5.324851 | Up | ANTXR cell adhesion molecule 1<br>insulin like growth factor 2 mRNA binding protein<br>3 |
| IGF2BP3   | 3.023841 | 5.23E-07 | 6.19E-06 | 5.315889 | Up |                                                                                          |
| IL2RA     | 1.561204 | 5.27E-07 | 6.22E-06 | 5.314141 | Up | interleukin 2 receptor subunit alpha                                                     |
| FAM83D    | 1.667622 | 5.3E-07  | 6.25E-06 | 5.313207 | Up | family with sequence similarity 83 member D                                              |
| BCAT1     | 1.669577 | 5.96E-07 | 6.91E-06 | 5.286322 | Up | branched chain amino acid transaminase 1                                                 |
| MYBL2     | 1.852727 | 6.84E-07 | 7.75E-06 | 5.25504  | Up | MYB proto-oncogene like 2                                                                |
| SCARF2    | 1.773794 | 6.97E-07 | 7.87E-06 | 5.250857 | Up | scavenger receptor class F member 2                                                      |
| AEBP1     | 2.090302 | 7.63E-07 | 8.51E-06 | 5.229903 | Up | AE binding protein 1                                                                     |
| ECT2      | 1.654658 | 8.21E-07 | 9.05E-06 | 5.213145 | Up | epithelial cell transforming 2                                                           |
| CLDN4     | 2.507943 | 8.77E-07 | 9.58E-06 | 5.198137 | Up | claudin 4                                                                                |
| DKK2      | 1.649707 | 8.98E-07 | 9.78E-06 | 5.19271  | Up | dickkopf WNT signaling pathway inhibitor 2                                               |
| CD109     | 1.660368 | 9.34E-07 | 1.01E-05 | 5.18369  | Up | CD109 molecule                                                                           |
| HIST3H2BB | 1.769554 | 9.72E-07 | 1.05E-05 | 5.174465 | Up | Histone H2B type 3-B                                                                     |
| LGI2      | 2.200628 | 9.77E-07 | 1.05E-05 | 5.173415 | Up | leucine rich repeat LGI family member 2                                                  |
| NEIL2     | 1.604316 | 1.04E-06 | 1.11E-05 | 5.15844  | Up | nei like DNA glycosylase 2                                                               |
| EGR2      | 1.661751 | 1.14E-06 | 1.2E-05  | 5.13733  | Up | early growth response 2                                                                  |
| ADAMTS9   | 1.572869 | 1.31E-06 | 1.35E-05 | 5.106375 | Up | ADAM metalloproteinase with thrombospondin<br>type 1 motif 9                             |
| COL11A1   | 3.770104 | 1.39E-06 | 1.42E-05 | 5.091092 | Up | collagen type XI alpha 1 chain                                                           |
| ITGB8     | 1.76404  | 1.4E-06  | 1.43E-05 | 5.090304 | Up | integrin subunit beta 8                                                                  |
| ZNF703    | 2.008932 | 1.52E-06 | 1.52E-05 | 5.070981 | Up | zinc finger protein 703                                                                  |
| PDE3A     | 1.945529 | 1.68E-06 | 1.65E-05 | 5.047789 | Up | phosphodiesterase 3A                                                                     |
| TNFRSF11B | 2.312306 | 1.69E-06 | 1.66E-05 | 5.046034 | Up | TNF receptor superfamily member 11b                                                      |
| CHRD2     | 2.572031 | 1.76E-06 | 1.71E-05 | 5.037378 | Up | chordin like 2                                                                           |
| STRA6     | 2.132464 | 1.76E-06 | 1.72E-05 | 5.036683 | Up | stimulated by retinoic acid 6                                                            |
| MFI2      | 2.253506 | 1.84E-06 | 1.78E-05 | 5.027016 | Up | Melanotransferrin                                                                        |
| F2RL2     | 2.038989 | 2.14E-06 | 2.02E-05 | 4.991024 | Up | coagulation factor II thrombin receptor like 2                                           |
| TYMP      | 1.570039 | 2.18E-06 | 2.05E-05 | 4.98695  | Up | thymidine phosphorylase                                                                  |
| HTRA1     | 1.605928 | 2.26E-06 | 2.12E-05 | 4.97802  | Up | HtrA serine peptidase 1                                                                  |
| GGT5      | 1.784196 | 2.62E-06 | 2.41E-05 | 4.943505 | Up | gamma-glutamyltransferase 5                                                              |
| LAMA5     | 1.740776 | 2.65E-06 | 2.44E-05 | 4.940342 | Up | laminin subunit alpha 5                                                                  |
| GFPT2     | 1.838625 | 2.95E-06 | 2.67E-05 | 4.91535  | Up | glutamine-fructose-6-phosphate transaminase 2                                            |
| PKDCC     | 2.156848 | 2.95E-06 | 2.67E-05 | 4.915316 | Up | protein kinase domain containing, cytoplasmic                                            |
| MAP1A     | 1.891892 | 3.23E-06 | 2.88E-05 | 4.893781 | Up | microtubule associated protein 1A                                                        |
| MYH10     | 1.618718 | 3.4E-06  | 3.01E-05 | 4.881443 | Up | myosin heavy chain 10                                                                    |
| MMP16     | 1.693752 | 3.4E-06  | 3.01E-05 | 4.88143  | Up | matrix metalloproteinase 16                                                              |
| LTBP2     | 2.006391 | 3.41E-06 | 3.01E-05 | 4.880896 | Up | latent transforming growth factor beta binding<br>protein 2                              |
| TREM1     | 1.925025 | 3.51E-06 | 3.08E-05 | 4.873843 | Up | triggering receptor expressed on myeloid cells 1                                         |
| CCL3      | 1.680971 | 3.82E-06 | 3.3E-05  | 4.853691 | Up | C-C motif chemokine ligand 3                                                             |
| DIO2      | 2.219681 | 3.87E-06 | 3.34E-05 | 4.851101 | Up | iodothyroninedeiodinase 2                                                                |
| CST1      | 3.432026 | 3.9E-06  | 3.36E-05 | 4.848715 | Up | cystatin SN                                                                              |
| UBE2C     | 1.564194 | 3.93E-06 | 3.38E-05 | 4.847262 | Up | ubiquitin conjugating enzyme E2 C                                                        |
| NCR3LG1   | 1.774407 | 3.97E-06 | 3.41E-05 | 4.844728 | Up | natural killer cell cytotoxicity receptor 3 ligand 1                                     |

|           |          |          |          |          |    |                                                                                                                       |
|-----------|----------|----------|----------|----------|----|-----------------------------------------------------------------------------------------------------------------------|
| AQP1      | 1.912101 | 4.25E-06 | 3.6E-05  | 4.828269 | Up | aquaporin 1 (Colton blood group)                                                                                      |
| CELSR3    | 1.893472 | 4.52E-06 | 3.78E-05 | 4.813793 | Up | cadherin EGF LAG seven-pass G-type receptor 3                                                                         |
| PTPRO     | 1.641236 | 4.56E-06 | 3.81E-05 | 4.81153  | Up | protein tyrosine phosphatase receptor type O                                                                          |
| PADI2     | 1.837363 | 4.68E-06 | 3.9E-05  | 4.805194 | Up | peptidyl arginine deiminase 2                                                                                         |
| SELL      | 1.712176 | 4.86E-06 | 4.02E-05 | 4.796038 | Up | selectin L                                                                                                            |
| DPYSL3    | 1.965102 | 4.94E-06 | 4.08E-05 | 4.792282 | Up | dihydropyrimidinase like 3                                                                                            |
| HIST1H3G  | 1.577336 | 5.35E-06 | 4.36E-05 | 4.773012 | Up | histone cluster 1 H3 family member g                                                                                  |
| FPR1      | 1.68925  | 5.41E-06 | 4.4E-05  | 4.770541 | Up | formyl peptide receptor 1                                                                                             |
| C13orf33  | 1.748636 | 6.21E-06 | 4.95E-05 | 4.737008 | Up | Mesenteric Estrogen Dependent Adipogenesis family with sequence similarity 19 (chemokine (C-C motif)-like), member A5 |
| FAM19A5   | 1.647679 | 6.4E-06  | 5.08E-05 | 4.729791 | Up | procollagen C-endopeptidase enhancer                                                                                  |
| PCOLCE    | 1.782918 | 6.69E-06 | 5.27E-05 | 4.71896  | Up | Acid trehalase-like protein 1.                                                                                        |
| ATHL1     | 1.857749 | 7.96E-06 | 6.11E-05 | 4.676623 | Up | complement C1r                                                                                                        |
| C1R       | 1.668333 | 8.01E-06 | 6.13E-05 | 4.675179 | Up | DNM3 opposite strand/antisense RNA pleckstrin homology and RhoGEF domain containing G4                                |
| DNM3OS    | 1.810025 | 8.44E-06 | 6.4E-05  | 4.662446 | Up | MYB proto-oncogene, transcription factor                                                                              |
| PLEKHG4   | 1.678447 | 9.06E-06 | 6.8E-05  | 4.645179 | Up | mitogen-activated protein kinase 15                                                                                   |
| MYB       | 1.976157 | 9.2E-06  | 6.89E-05 | 4.641278 | Up | thrombospondin 4                                                                                                      |
| MAPK15    | 1.566636 | 9.35E-06 | 6.98E-05 | 4.637383 | Up | calcium voltage-gated channel subunit alpha1 E                                                                        |
| THBS4     | 4.239608 | 9.36E-06 | 6.99E-05 | 4.637157 | Up | interferon induced transmembrane protein 1                                                                            |
| CACNA1E   | 1.952079 | 1.03E-05 | 7.57E-05 | 4.613471 | Up | forkhead box C1                                                                                                       |
| IFITM1    | 1.68165  | 1.05E-05 | 7.66E-05 | 4.609872 | Up | spalt like transcription factor 4                                                                                     |
| FOXC1     | 1.657759 | 1.31E-05 | 9.29E-05 | 4.554126 | Up | gremlin 1, DAN family BMP antagonist                                                                                  |
| SALL4     | 2.027354 | 1.36E-05 | 9.55E-05 | 4.545063 | Up | matrix remodeling associated 8                                                                                        |
| GREM1     | 2.236937 | 1.41E-05 | 9.86E-05 | 4.535872 | Up | long intergenic non-protein coding RNA 578                                                                            |
| MXRA8     | 1.673416 | 1.53E-05 | 0.000106 | 4.51605  | Up | TNF alpha induced protein 6                                                                                           |
| LINC00578 | 1.578457 | 1.54E-05 | 0.000107 | 4.513109 | Up | growth arrest specific 7                                                                                              |
| TNFAIP6   | 1.55874  | 1.55E-05 | 0.000107 | 4.512004 | Up | oncostatin M                                                                                                          |
| GAS7      | 1.642789 | 1.63E-05 | 0.000112 | 4.499178 | Up | prostaglandin-endoperoxide synthase 2                                                                                 |
| OSM       | 2.089218 | 1.64E-05 | 0.000112 | 4.498105 | Up | GLI family zinc finger 2                                                                                              |
| PTGS2     | 2.220566 | 1.74E-05 | 0.000118 | 4.483727 | Up | cyclin D2                                                                                                             |
| GLI2      | 1.767141 | 1.75E-05 | 0.000118 | 4.481492 | Up | AHNAK nucleoprotein 2                                                                                                 |
| CCND2     | 1.851117 | 1.82E-05 | 0.000122 | 4.472625 | Up | mex-3 RNA binding family member A                                                                                     |
| AHNAK2    | 2.276015 | 1.94E-05 | 0.000129 | 4.456469 | Up | integrin subunit beta like 1                                                                                          |
| MEX3A     | 1.55585  | 1.96E-05 | 0.000131 | 4.453107 | Up | F-box protein 32                                                                                                      |
| ITGBL1    | 2.678016 | 1.99E-05 | 0.000132 | 4.449749 | Up | selectin E                                                                                                            |
| FBXO32    | 1.658792 | 2.3E-05  | 0.000149 | 4.413422 | Up | complement C3                                                                                                         |
| SELE      | 2.552922 | 2.36E-05 | 0.000153 | 4.40637  | Up | guanylate binding protein 5                                                                                           |
| C3        | 2.416315 | 2.47E-05 | 0.000158 | 4.39516  | Up | aldehyde dehydrogenase 1 family member A3                                                                             |
| GBP5      | 1.887503 | 2.54E-05 | 0.000162 | 4.387905 | Up | homeobox A10                                                                                                          |
| ALDH1A3   | 1.747154 | 2.69E-05 | 0.000171 | 4.373742 | Up | dynamin 1                                                                                                             |
| HOXA10    | 1.767013 | 2.96E-05 | 0.000185 | 4.349093 | Up | chitinase 3 like 1                                                                                                    |
| DNM1      | 1.641482 | 2.99E-05 | 0.000186 | 4.346055 | Up |                                                                                                                       |
| CHI3L1    | 2.692343 | 3E-05    | 0.000187 | 4.345501 | Up |                                                                                                                       |

|                  |          |          |          |          |    |                                                                             |
|------------------|----------|----------|----------|----------|----|-----------------------------------------------------------------------------|
| KRT80            | 1.999185 | 3.3E-05  | 0.000203 | 4.320945 | Up | keratin 80                                                                  |
| SLC28A3          | 2.007432 | 3.61E-05 | 0.000218 | 4.298069 | Up | solute carrier family 28 member 3                                           |
| VGLL3            | 1.741023 | 3.72E-05 | 0.000224 | 4.290212 | Up | vestigial like family member 3                                              |
| CPXM2            | 1.872947 | 3.84E-05 | 0.00023  | 4.282207 | Up | carboxypeptidase X, M14 family member 2                                     |
| BCL2A1           | 1.656709 | 3.86E-05 | 0.000231 | 4.280957 | Up | BCL2 related protein A1                                                     |
| PI15             | 2.584688 | 4.22E-05 | 0.000249 | 4.257782 | Up | peptidase inhibitor 15                                                      |
| IGSF9B           | 1.553308 | 4.68E-05 | 0.000271 | 4.231241 | Up | immunoglobulin superfamily member 9B                                        |
| LOC154860        | 1.590749 | 4.69E-05 | 0.000271 | 4.230639 | Up | #N/A                                                                        |
| HMCN1            | 2.380264 | 5.36E-05 | 0.000305 | 4.195435 | Up | hemicentin 1                                                                |
| SLC24A3          | 1.603357 | 5.51E-05 | 0.000313 | 4.18864  | Up | solute carrier family 24 member 3                                           |
| CXCL1            | 2.294197 | 5.51E-05 | 0.000313 | 4.188195 | Up | C-X-C motif chemokine ligand 1                                              |
| ODZ4             | 1.748243 | 5.53E-05 | 0.000314 | 4.187256 | Up | Teneurin-4<br>calcium/calmodulin dependent protein kinase II<br>inhibitor 1 |
| CAMK2N1          | 1.634814 | 5.66E-05 | 0.00032  | 4.181603 | Up |                                                                             |
| AGT              | 2.291038 | 6.55E-05 | 0.000361 | 4.142954 | Up | angiotensinogen                                                             |
| IL8              | 2.999956 | 6.88E-05 | 0.000377 | 4.129921 | Up | interleukin 8                                                               |
| HOXB9            | 1.958455 | 7.39E-05 | 0.000401 | 4.111134 | Up | homeobox B9                                                                 |
| APLN             | 1.555857 | 9.33E-05 | 0.000489 | 4.049282 | Up | apelin                                                                      |
| EPHB1            | 1.685685 | 0.000107 | 0.000549 | 4.013409 | Up | EPH receptor B1                                                             |
| AQP9             | 1.933182 | 0.000117 | 0.000597 | 3.987386 | Up | aquaporin 9                                                                 |
| HEPH             | 2.011133 | 0.000119 | 0.000602 | 3.984451 | Up | hephaestin                                                                  |
| NEB              | 2.076932 | 0.00012  | 0.000608 | 3.981512 | Up | nebulin                                                                     |
| KRT17            | 2.919829 | 0.000124 | 0.000626 | 3.972853 | Up | keratin 17                                                                  |
| VIL1             | 2.131168 | 0.000133 | 0.000666 | 3.953475 | Up | villin 1                                                                    |
| MLK7-AS1         | 1.815952 | 0.000134 | 0.000671 | 3.951002 | Up | MLK7 antisense RNA 1                                                        |
| HOXA13           | 2.203005 | 0.00014  | 0.000692 | 3.940298 | Up | homeobox A13                                                                |
| MIR100HG         | 1.672169 | 0.000143 | 0.000704 | 3.934599 | Up | mir-100-let-7a-2-mir-125b-1 cluster host gene                               |
| C2orf89          | 1.980425 | 0.000151 | 0.00074  | 3.918988 | Up | chromosome 2 open reading frame 89                                          |
| CDX2             | 2.101672 | 0.000161 | 0.000781 | 3.901649 | Up | caudal type homeobox 2                                                      |
| TNC              | 1.759858 | 0.000166 | 0.0008   | 3.893609 | Up | tenascin C                                                                  |
| COL16A1          | 1.675579 | 0.000175 | 0.000841 | 3.878528 | Up | collagen type XVI alpha 1 chain                                             |
| NRK              | 2.007124 | 0.000195 | 0.000922 | 3.848801 | Up | Nik related kinase                                                          |
| HKDC1            | 2.071149 | 0.000266 | 0.001194 | 3.762683 | Up | hexokinase domain containing 1                                              |
| GDF15            | 1.618022 | 0.000285 | 0.001269 | 3.742307 | Up | growth differentiation factor 15                                            |
| MMP3             | 2.913904 | 0.000337 | 0.001464 | 3.695627 | Up | matrix metalloproteinase 3                                                  |
| MYOM3            | 1.83562  | 0.000337 | 0.001466 | 3.6951   | Up | myomesin 3                                                                  |
| LOC10012469<br>2 | 2.216207 | 0.000349 | 0.001509 | 3.685408 | Up | #N/A                                                                        |
| IFI44L           | 1.587711 | 0.000365 | 0.00157  | 3.672376 | Up | interferon induced protein 44 like                                          |
| PLEKHS1          | 2.099427 | 0.000395 | 0.001677 | 3.65015  | Up | pleckstrin homology domain containing S1                                    |
| CDH3             | 1.714521 | 0.000401 | 0.001699 | 3.645624 | Up | cadherin 3                                                                  |
| ELN              | 2.002142 | 0.000425 | 0.001782 | 3.629115 | Up | elastin                                                                     |
| COMP             | 1.742429 | 0.000454 | 0.001884 | 3.610079 | Up | cartilage oligomeric matrix protein                                         |
| MMP9             | 1.99775  | 0.000464 | 0.00192  | 3.603783 | Up | matrix metalloproteinase 9                                                  |



|           |          |          |          |          |    |                                                             |
|-----------|----------|----------|----------|----------|----|-------------------------------------------------------------|
| CLDN3     | 2.474438 | 0.000465 | 0.001923 | 3.602954 | Up | claudin 3                                                   |
| CRABP2    | 1.566544 | 0.000495 | 0.002026 | 3.584792 | Up | cellular retinoic acid binding protein 2                    |
| ABCA13    | 1.592582 | 0.000498 | 0.002036 | 3.583143 | Up | ATP binding cassette subfamily A member 13                  |
| LINC00478 | 1.585816 | 0.000504 | 0.002054 | 3.579916 | Up | #N/A                                                        |
| IL6       | 1.683392 | 0.000519 | 0.002112 | 3.571026 | Up | interleukin 6                                               |
| CXCL6     | 1.96745  | 0.000709 | 0.002755 | 3.479615 | Up | C-X-C motif chemokine ligand 6                              |
| LOC93432  | 1.946221 | 0.000758 | 0.002913 | 3.459718 | Up | #N/A                                                        |
| LGR5      | 1.783554 | 0.000797 | 0.003041 | 3.444591 | Up | leucine rich repeat containing G protein-coupled receptor 5 |
| FLRT2     | 1.639972 | 0.000883 | 0.00331  | 3.414201 | Up | fibronectinleucine rich transmembrane protein 2             |
| STK31     | 1.593465 | 0.000899 | 0.003358 | 3.408694 | Up | serine/threonine kinase 31                                  |
| C2CD4A    | 1.641563 | 0.001085 | 0.003936 | 3.351939 | Up | C2 calcium dependent domain containing 4A                   |
| SFRP2     | 2.377128 | 0.001102 | 0.003989 | 3.347103 | Up | secreted frizzled related protein 2                         |
| TRIM29    | 2.175502 | 0.001163 | 0.00418  | 3.330604 | Up | tripartite motif containing 29                              |
| EPHA3     | 1.60529  | 0.001288 | 0.004552 | 3.299431 | Up | EPH receptor A3                                             |
| OMD       | 1.604119 | 0.001325 | 0.004665 | 3.290695 | Up | osteomodulin                                                |
| CXCL9     | 1.737291 | 0.001451 | 0.00504  | 3.262741 | Up | C-X-C motif chemokine ligand 9                              |
| CLDN2     | 2.328    | 0.001468 | 0.005088 | 3.259026 | Up | claudin 2                                                   |
| IL11      | 1.74806  | 0.001484 | 0.005136 | 3.255678 | Up | interleukin 11                                              |
| ROBO2     | 1.597553 | 0.001824 | 0.006131 | 3.191206 | Up | roundabout guidance receptor 2                              |
| MYO7B     | 2.265256 | 0.002115 | 0.006956 | 3.144449 | Up | myosin VIIB                                                 |
| BOC       | 1.564592 | 0.002391 | 0.007737 | 3.105276 | Up | BOC cell adhesion associated, oncogene regulated            |
| CCDC80    | 1.737263 | 0.002517 | 0.008086 | 3.088781 | Up | coiled-coil domain containing 80                            |
| ANXA13    | 2.127525 | 0.002728 | 0.008669 | 3.062776 | Up | annexin A13                                                 |
| MGP       | 1.760338 | 0.002932 | 0.009217 | 3.039314 | Up | matrix Gla protein                                          |
| CYP2B6    | 1.577043 | 0.003615 | 0.011048 | 2.970589 | Up | cytochrome P450 family 2 subfamily B member 6               |
| SLC39A5   | 1.929535 | 0.003709 | 0.011286 | 2.962123 | Up | solute carrier family 39 member 5                           |
| SERPINB5  | 2.091229 | 0.003875 | 0.011718 | 2.947537 | Up | serpin family B member 5                                    |
| CYP2W1    | 1.750607 | 0.004086 | 0.012245 | 2.929892 | Up | cytochrome P450 family 2 subfamily W member 1               |
| MMP1      | 1.872645 | 0.004143 | 0.012387 | 2.925223 | Up | matrix metalloproteinase 1                                  |
| PPP1R1B   | 2.052602 | 0.004324 | 0.012839 | 2.910954 | Up | protein phosphatase 1 regulatory inhibitor subunit 1B       |
| CCL18     | 1.586798 | 0.004432 | 0.013114 | 2.902656 | Up | C-C motif chemokine ligand 18                               |
| CLRN3     | 1.612409 | 0.00469  | 0.013758 | 2.883553 | Up | clarin 3                                                    |
| KLK6      | 1.688522 | 0.004878 | 0.014216 | 2.87025  | Up | kallikrein related peptidase 6                              |
| CDH17     | 2.620031 | 0.005285 | 0.015217 | 2.842959 | Up | cadherin 17                                                 |
| IDO1      | 1.779523 | 0.007847 | 0.021186 | 2.705718 | Up | indoleamine 2,3-dioxygenase 1                               |
| FCGR3B    | 1.579377 | 0.009356 | 0.024675 | 2.643002 | Up | Fc fragment of IgG receptor IIIb                            |
| WDR72     | 1.857672 | 0.010012 | 0.026125 | 2.618572 | Up | WD repeat domain 72                                         |
| MMP7      | 2.195172 | 0.0136   | 0.033814 | 2.506018 | Up | matrix metalloproteinase 7                                  |
| MSLN      | 2.009849 | 0.014377 | 0.035418 | 2.485225 | Up | mesothelin                                                  |
| MUC16     | 1.592157 | 0.01469  | 0.036076 | 2.477136 | Up | mucin 16, cell surface associated                           |
| TNS4      | 1.670843 | 0.01559  | 0.03795  | 2.454666 | Up | tensin 4                                                    |
| CPS1      | 2.230898 | 0.020655 | 0.048108 | 2.346431 | Up | carbamoyl-phosphate synthase 1                              |

|           |          |          |          |          |      |                                                                  |
|-----------|----------|----------|----------|----------|------|------------------------------------------------------------------|
| GUCA2B    | -2.7219  | 3.07E-22 | 7.27E-18 | -12.0832 | Down | guanylatecyclase activator 2B                                    |
| LINC00332 | -1.1776  | 3.45E-21 | 4.09E-17 | -11.6342 | Down | long intergenic non-protein coding RNA 332                       |
| C14orf180 | -1.50929 | 1.52E-19 | 7.66E-16 | -10.9349 | Down | chromosome 14 open reading frame 180                             |
| ADH7      | -3.79214 | 1.93E-18 | 5.08E-15 | -10.4663 | Down | alcohol dehydrogenase 7 (class IV), mu or sigma polypeptide      |
| ATP4A     | -7.94795 | 5.13E-18 | 1.22E-14 | -10.2859 | Down | ATPase H+/K+ transporting subunit alpha                          |
| CWH43     | -3.38545 | 5.94E-18 | 1.28E-14 | -10.2588 | Down | cell wall biogenesis 43 C-terminal homolog                       |
| MAL       | -3.08582 | 1.16E-17 | 1.83E-14 | -10.1352 | Down | mal, T cell differentiation protein                              |
| ATP4B     | -7.22434 | 1.86E-17 | 2.59E-14 | -10.0482 | Down | ATPase H+/K+ transporting subunit beta                           |
| CHIA      | -4.12203 | 2.65E-17 | 3.3E-14  | -9.9833  | Down | chitinase acidic                                                 |
| HTR1E     | -1.16176 | 6.6E-17  | 7.44E-14 | -9.81443 | Down | 5-hydroxytryptamine receptor 1E                                  |
| CCKAR     | -3.34303 | 1.72E-16 | 1.7E-13  | -9.63723 | Down | cholecystokinin A receptor                                       |
| LGALS9B   | -3.08644 | 2.73E-16 | 2.31E-13 | -9.55146 | Down | galectin 9B                                                      |
| PDILT     | -3.17607 | 2.88E-16 | 2.35E-13 | -9.54145 | Down | protein disulfideisomerase like, testis expressed                |
| SLC5A5    | -6.1349  | 3.51E-16 | 2.66E-13 | -9.50499 | Down | solute carrier family 5 member 5                                 |
| PGA5      | -8.20606 | 3.6E-16  | 2.66E-13 | -9.50047 | Down | pepsinogen A5                                                    |
| GUCA1C    | -1.35912 | 5.33E-16 | 3.7E-13  | -9.42767 | Down | guanylatecyclase activator 1C                                    |
| GRIA4     | -2.69276 | 5.51E-16 | 3.7E-13  | -9.42125 | Down | glutamate ionotropic receptor AMPA type subunit 4                |
| RDH12     | -2.86156 | 6.36E-16 | 3.86E-13 | -9.39465 | Down | retinol dehydrogenase 12                                         |
| PSAPL1    | -5.56816 | 1.05E-15 | 6.07E-13 | -9.30131 | Down | prosaposin like 1 (gene/pseudogene)                              |
| VSTM2A    | -1.5564  | 1.83E-15 | 8.84E-13 | -9.19831 | Down | V-set and transmembrane domain containing 2A                     |
| AGXT2L1   | -3.07655 | 1.99E-15 | 9.41E-13 | -9.1829  | Down | Alanine--glyoxylate aminotransferase 2-like 1 isoform 1          |
| ASB11     | -2.7366  | 2.34E-15 | 1.02E-12 | -9.15274 | Down | ankyrin repeat and SOCS box containing 11                        |
| GNMT      | -1.40388 | 2.58E-15 | 1.11E-12 | -9.1341  | Down | glycine N-methyltransferase                                      |
| CCKBR     | -3.28447 | 2.62E-15 | 1.11E-12 | -9.13137 | Down | cholecystokinin B receptor                                       |
| DCAF12L1  | -1.38042 | 2.95E-15 | 1.22E-12 | -9.10962 | Down | DDB1 and CUL4 associated factor 12 like 1                        |
| GSTA3     | -1.58126 | 4.2E-15  | 1.69E-12 | -9.04349 | Down | glutathione S-transferase alpha 3                                |
| SCNN1B    | -3.05194 | 4.76E-15 | 1.88E-12 | -9.02024 | Down | sodium channel epithelial 1 beta subunit                         |
| AQP4      | -4.31119 | 1.45E-14 | 4.84E-12 | -8.81159 | Down | aquaporin 4                                                      |
| TMED6     | -2.62873 | 1.93E-14 | 6.02E-12 | -8.75803 | Down | transmembrane p24 trafficking protein 6                          |
| FAM135B   | -1.56176 | 2.74E-14 | 8E-12    | -8.69261 | Down | family with sequence similarity 135 member B                     |
| GIF       | -7.35545 | 4.9E-14  | 1.3E-11  | -8.58318 | Down | gastric intrinsic factor                                         |
| DNER      | -3.2273  | 5.79E-14 | 1.47E-11 | -8.55171 | Down | delta/notch like EGF repeat containing                           |
| GKN2      | -8.97895 | 6.38E-14 | 1.57E-11 | -8.53346 | Down | gastrokine 2                                                     |
| ESRRG     | -4.70155 | 7.39E-14 | 1.77E-11 | -8.50569 | Down | estrogen related receptor gamma                                  |
| B3GAT1    | -2.2731  | 7.93E-14 | 1.88E-11 | -8.4924  | Down | beta-1,3-glucuronyltransferase 1                                 |
| DNMBP-AS1 | -1.61328 | 8.08E-14 | 1.9E-11  | -8.48885 | Down | DNMBP antisense RNA 1                                            |
| GKN1      | -10.7882 | 1.07E-13 | 2.4E-11  | -8.43508 | Down | gastrokine 1                                                     |
| TRIM50    | -3.04881 | 1.21E-13 | 2.63E-11 | -8.41231 | Down | tripartite motif containing 50                                   |
| LGALS9C   | -3.4389  | 1.35E-13 | 2.87E-11 | -8.39232 | Down | galectin 9C                                                      |
| PGA4      | -1.61309 | 1.39E-13 | 2.93E-11 | -8.38695 | Down | pepsinogen A4                                                    |
| UNC5D     | -1.19374 | 1.76E-13 | 3.62E-11 | -8.34178 | Down | unc-5 netrin receptor D                                          |
| KCNE2     | -4.98462 | 1.8E-13  | 3.65E-11 | -8.33726 | Down | potassium voltage-gated channel subfamily E regulatory subunit 2 |

|           |          |          |          |          |      |                                                              |
|-----------|----------|----------|----------|----------|------|--------------------------------------------------------------|
| LOC388387 | -1.73995 | 2.33E-13 | 4.56E-11 | -8.28855 | Down | #N/A                                                         |
| LOC728606 | -2.5326  | 2.47E-13 | 4.79E-11 | -8.27777 | Down | #N/A                                                         |
| SIGLEC11  | -2.42008 | 4.48E-13 | 7.74E-11 | -8.16441 | Down | sialic acid binding Ig like lectin 11                        |
| SCGB2A1   | -2.78376 | 4.99E-13 | 8.26E-11 | -8.14398 | Down | secretoglobin family 2A member 1                             |
| CKM       | -2.63883 | 6.25E-13 | 9.79E-11 | -8.10113 | Down | creatine kinase, M-type                                      |
| FMO6P     | -1.85337 | 6.53E-13 | 1.01E-10 | -8.09258 | Down | flavin containing dimethylanilinemonooxygenase 6, pseudogene |
| LOC150622 | -2.27665 | 6.82E-13 | 1.05E-10 | -8.08429 | Down | #N/A                                                         |
| CPA2      | -4.84591 | 1.04E-12 | 1.48E-10 | -8.00357 | Down | carboxypeptidase A2                                          |
| EEF1A2    | -2.65996 | 1.41E-12 | 1.92E-10 | -7.94605 | Down | eukaryotic translation elongation factor 1 alpha 2           |
| LIPF      | -10.3248 | 1.76E-12 | 2.3E-10  | -7.9034  | Down | lipase F, gastric type                                       |
| SPINK13   | -1.45446 | 2.63E-12 | 3.23E-10 | -7.82546 | Down | serine peptidase inhibitor, Kazal type 13 (putative)         |
| HRASLS2   | -4.085   | 2.87E-12 | 3.51E-10 | -7.80865 | Down | HRAS-like suppressor 2                                       |
| GCNT4     | -3.44785 | 3.16E-12 | 3.8E-10  | -7.79046 | Down | glucosaminyl (N-acetyl) transferase 4                        |
| CLCNKA    | -1.66591 | 6.62E-12 | 7.13E-10 | -7.64752 | Down | chloride voltage-gated channel Ka                            |
| ESRRB     | -1.73267 | 6.74E-12 | 7.22E-10 | -7.64407 | Down | estrogen related receptor beta                               |
| CNTN3     | -1.44241 | 7.14E-12 | 7.52E-10 | -7.63278 | Down | contactin 3                                                  |
| KCNJ16    | -4.09464 | 9.01E-12 | 9.04E-10 | -7.58774 | Down | potassium inwardly rectifying channel subfamily J member 16  |
| SOSTDC1   | -4.29253 | 1.24E-11 | 1.17E-09 | -7.5263  | Down | sclerostin domain containing 1                               |
| SH3GL2    | -2.06709 | 1.38E-11 | 1.29E-09 | -7.50487 | Down | SH3 domain containing GRB2 like 2, endophilin A1             |
| FLJ42875  | -2.84725 | 1.83E-11 | 1.64E-09 | -7.44946 | Down | #N/A                                                         |
| IRX3      | -1.97395 | 2.07E-11 | 1.82E-09 | -7.42543 | Down | iroquoishomeobox 3                                           |
| ASAH2     | -2.33127 | 3.38E-11 | 2.68E-09 | -7.32979 | Down | N-acylsphingosineamidohydrolase 2                            |
| SCNN1G    | -2.51233 | 3.97E-11 | 3.07E-09 | -7.29803 | Down | sodium channel epithelial 1 gamma subunit                    |
| PGA3      | -8.64003 | 4.08E-11 | 3.13E-09 | -7.29249 | Down | pepsinogen A3                                                |
| ACADL     | -1.50519 | 5.1E-11  | 3.69E-09 | -7.24896 | Down | acyl-CoA dehydrogenase long chain                            |
| ACER2     | -2.90333 | 6.04E-11 | 4.23E-09 | -7.21546 | Down | alkaline ceramidase 2                                        |
| RNASE1    | -2.94249 | 8.7E-11  | 5.64E-09 | -7.14325 | Down | ribonuclease A family member 1, pancreatic                   |
| SLC7A8    | -1.66853 | 1.08E-10 | 6.71E-09 | -7.10037 | Down | solute carrier family 7 member 8                             |
| PM20D1    | -1.32165 | 1.63E-10 | 9.34E-09 | -7.01865 | Down | peptidase M20 domain containing 1                            |
| C17orf110 | -2.46061 | 1.77E-10 | 9.98E-09 | -7.00211 | Down | Small Integral Membrane Protein 6                            |
| NRG4      | -2.30508 | 1.78E-10 | 9.99E-09 | -7.00084 | Down | neuregulin 4                                                 |
| AQP10     | -1.46396 | 1.87E-10 | 1.04E-08 | -6.99086 | Down | aquaporin 10                                                 |
| DMRTA1    | -2.06762 | 2.03E-10 | 1.1E-08  | -6.97447 | Down | DMRT like family A1                                          |
| APLP1     | -2.38614 | 2.31E-10 | 1.22E-08 | -6.94873 | Down | amyloid beta precursor like protein 1                        |
| SULT2A1   | -3.326   | 2.72E-10 | 1.38E-08 | -6.91584 | Down | sulfotransferase family 2A member 1                          |
| PXMP2     | -1.58853 | 3.07E-10 | 1.52E-08 | -6.89205 | Down | peroxisomal membrane protein 2                               |
| SLC26A7   | -2.5464  | 3.37E-10 | 1.64E-08 | -6.87293 | Down | solute carrier family 26 member 7                            |
| SLC9A4    | -4.74981 | 4.57E-10 | 2.11E-08 | -6.81174 | Down | solute carrier family 9 member A4                            |
| NKX6-2    | -2.77989 | 5.24E-10 | 2.32E-08 | -6.78422 | Down | NK6 homeobox 2                                               |
| RAB27A    | -1.63418 | 6.75E-10 | 2.81E-08 | -6.733   | Down | RAB27A, member RAS oncogene family                           |
| RPRM      | -1.3426  | 8.16E-10 | 3.25E-08 | -6.69476 | Down | reprimin, TP53 dependent G2 arrest mediator homolog          |
| DPCR1     | -3.89479 | 8.97E-10 | 3.49E-08 | -6.67532 | Down | #N/A                                                         |

|             |          |          |          |          |      |                                                 |
|-------------|----------|----------|----------|----------|------|-------------------------------------------------|
| AMTN        | -1.80401 | 1.04E-09 | 3.94E-08 | -6.64447 | Down | amelotin                                        |
| LDHD        | -2.31421 | 1.12E-09 | 4.18E-08 | -6.62935 | Down | lactate dehydrogenase D                         |
| SOX21       | -3.76428 | 1.18E-09 | 4.34E-08 | -6.61935 | Down | SRY-box transcription factor 21                 |
| MFSD4       | -3.84008 | 1.36E-09 | 4.84E-08 | -6.59049 | Down | #N/A                                            |
| FBP2        | -2.70325 | 1.38E-09 | 4.89E-08 | -6.58779 | Down | fructose-bisphosphatase 2                       |
| ENHO        | -1.15412 | 1.41E-09 | 4.98E-08 | -6.5826  | Down | energy homeostasis associated                   |
| SNORD116-8  | -1.88842 | 1.52E-09 | 5.28E-08 | -6.56728 | Down | small nucleolar RNA, C/D box 116-8              |
| SPTSSB      | -3.57356 | 1.65E-09 | 5.67E-08 | -6.55066 | Down | serine palmitoyltransferase small subunit B     |
| RANBP3L     | -1.26145 | 1.67E-09 | 5.7E-08  | -6.54868 | Down | RAN binding protein 3 like                      |
| COL2A1      | -2.95189 | 1.84E-09 | 6.15E-08 | -6.52898 | Down | collagen type II alpha 1 chain                  |
| LINC00520   | -1.52475 | 1.85E-09 | 6.17E-08 | -6.52761 | Down | long intergenic non-protein coding RNA 520      |
| MAP7D2      | -3.20063 | 1.85E-09 | 6.18E-08 | -6.52716 | Down | MAP7 domain containing 2                        |
| REP15       | -3.34177 | 1.99E-09 | 6.54E-08 | -6.51265 | Down | RAB15 effector protein                          |
| SNORD116-22 | -1.53513 | 3.37E-09 | 1.01E-07 | -6.40446 | Down | small nucleolar RNA, C/D box 116-22             |
| FBXL13      | -1.51457 | 4.12E-09 | 1.21E-07 | -6.36247 | Down | F-box and leucine rich repeat protein 13        |
| SST         | -3.53196 | 4.21E-09 | 1.23E-07 | -6.35817 | Down | somatostatin                                    |
| SSTR1       | -2.89045 | 4.95E-09 | 1.4E-07  | -6.32433 | Down | somatostatin receptor 1                         |
| CYSTM1      | -2.62765 | 4.97E-09 | 1.41E-07 | -6.32349 | Down | cysteine rich transmembrane module containing 1 |
| SNORD116-24 | -1.92841 | 5.04E-09 | 1.41E-07 | -6.3207  | Down | small nucleolar RNA, C/D box 116-24             |
| UBE2QL1     | -1.33169 | 6.9E-09  | 1.82E-07 | -6.25529 | Down | ubiquitin conjugating enzyme E2 Q family like 1 |
| SLC26A9     | -3.70909 | 7.03E-09 | 1.84E-07 | -6.2514  | Down | solute carrier family 26 member 9               |
| AKR1B15     | -1.68777 | 7.81E-09 | 2E-07    | -6.2293  | Down | aldo-ketoreductase family 1 member B15          |
| C16orf89    | -3.15116 | 8.26E-09 | 2.08E-07 | -6.21756 | Down | chromosome 16 open reading frame 89             |
| DHRS7       | -1.25342 | 8.5E-09  | 2.13E-07 | -6.21152 | Down | dehydrogenase/reductase 7                       |
| GHRL        | -2.81942 | 1.04E-08 | 2.53E-07 | -6.16876 | Down | ghrelin and obestatinprepropeptide              |
| MYOC        | -2.36235 | 1.1E-08  | 2.65E-07 | -6.15769 | Down | myocilin                                        |
| PLIN5       | -1.63943 | 1.1E-08  | 2.65E-07 | -6.15738 | Down | perilipin 5                                     |
| TFF1        | -5.96452 | 1.28E-08 | 2.99E-07 | -6.12626 | Down | trefoil factor 1                                |
| SNORD116-15 | -1.81246 | 1.32E-08 | 3.06E-07 | -6.11943 | Down | small nucleolar RNA, C/D box 116-15             |
| CLIC6       | -3.00234 | 1.38E-08 | 3.18E-07 | -6.11    | Down | chloride intracellular channel 6                |
| GPX3        | -1.53402 | 1.39E-08 | 3.19E-07 | -6.10797 | Down | glutathione peroxidase 3                        |
| SNORD116-1  | -1.23006 | 1.41E-08 | 3.21E-07 | -6.1057  | Down | small nucleolar RNA, C/D box 116-1              |
| C17orf109   | -1.78583 | 1.55E-08 | 3.48E-07 | -6.08492 | Down | Small Integral Membrane Protein 5)              |
| SNORD116-16 | -1.85033 | 1.63E-08 | 3.65E-07 | -6.07383 | Down | small nucleolar RNA, C/D box 116-16             |
| DDX60       | -1.90016 | 1.7E-08  | 3.75E-07 | -6.06529 | Down | DEXD/H-box helicase 60                          |
| AKR1C1      | -2.71499 | 1.87E-08 | 4.06E-07 | -6.04482 | Down | aldo-ketoreductase family 1 member C1           |
| CHGA        | -4.92682 | 1.95E-08 | 4.18E-07 | -6.03667 | Down | chromogranin A                                  |
| ATP13A5     | -1.21452 | 1.95E-08 | 4.18E-07 | -6.03656 | Down | ATPase 13A5                                     |
| CKB         | -2.96435 | 2.2E-08  | 4.62E-07 | -6.01088 | Down | creatine kinase B                               |
| GPER        | -1.80627 | 2.36E-08 | 4.89E-07 | -5.99599 | Down | G protein-coupled estrogen receptor 1           |
| SNORD8      | -1.80282 | 3.07E-08 | 6.02E-07 | -5.93999 | Down | small nucleolar RNA, C/D box 8                  |
| CADM2       | -1.89173 | 3.26E-08 | 6.3E-07  | -5.92695 | Down | cell adhesion molecule 2                        |
| ZNF385B     | -1.78893 | 3.57E-08 | 6.78E-07 | -5.90705 | Down | zinc finger protein 385B                        |

|              |          |          |          |          |      |                                                             |
|--------------|----------|----------|----------|----------|------|-------------------------------------------------------------|
| ACSM1        | -1.46055 | 3.7E-08  | 6.96E-07 | -5.89993 | Down | acyl-CoA synthetase medium chain family member 1            |
| TFF2         | -6.44232 | 3.72E-08 | 7E-07    | -5.89859 | Down | trefoil factor 2                                            |
| CSTA         | -1.86609 | 4.26E-08 | 7.81E-07 | -5.86943 | Down | cystatin A                                                  |
| PTGDR2       | -1.81674 | 4.69E-08 | 8.46E-07 | -5.84879 | Down | prostaglandin D2 receptor 2                                 |
| APOBEC2      | -1.56849 | 4.86E-08 | 8.7E-07  | -5.84084 | Down | apolipoprotein B mRNA editing enzyme catalytic subunit 2    |
| GPRC5C       | -1.81291 | 5.23E-08 | 9.22E-07 | -5.82526 | Down | G protein-coupled receptor class C group 5 member C         |
| MTIM         | -2.74482 | 5.39E-08 | 9.43E-07 | -5.8186  | Down | metallothionein 1M                                          |
| ALDH6A1      | -1.28921 | 5.45E-08 | 9.53E-07 | -5.81603 | Down | aldehyde dehydrogenase 6 family member A1                   |
| PDGFD        | -1.8933  | 6.04E-08 | 1.04E-06 | -5.79406 | Down | platelet derived growth factor D                            |
| FUT9         | -4.25189 | 6.29E-08 | 1.08E-06 | -5.78508 | Down | fucosyltransferase 9                                        |
| AKR7A3       | -2.97814 | 6.47E-08 | 1.11E-06 | -5.77892 | Down | aldo-ketoreductase family 7 member A3                       |
| GATA5        | -2.62837 | 6.7E-08  | 1.14E-06 | -5.77143 | Down | GATA binding protein 5                                      |
| PSCA         | -5.92828 | 6.79E-08 | 1.15E-06 | -5.76865 | Down | prostate stem cell antigen                                  |
| SYT16        | -1.31438 | 7.05E-08 | 1.19E-06 | -5.76027 | Down | synaptotagmin 16                                            |
| FRMD1        | -2.30851 | 7.11E-08 | 1.19E-06 | -5.75872 | Down | FERM domain containing 1                                    |
| HPGD         | -3.26128 | 7.9E-08  | 1.3E-06  | -5.7357  | Down | 15-hydroxyprostaglandin dehydrogenase                       |
| ERO1LB       | -1.53891 | 8.63E-08 | 1.4E-06  | -5.71649 | Down | endoplasmic reticulum oxidoreductase 1 beta                 |
| LOC100289255 | -2.65977 | 9.04E-08 | 1.45E-06 | -5.70623 | Down | #N/A                                                        |
| B4GALNT3     | -2.22696 | 1.02E-07 | 1.61E-06 | -5.68052 | Down | beta-1,4-N-acetyl-galactosaminyltransferase 3               |
| AKR1C2       | -3.36163 | 1.08E-07 | 1.68E-06 | -5.66757 | Down | aldo-ketoreductase family 1 member C2                       |
| TMEM220      | -1.43809 | 1.14E-07 | 1.76E-06 | -5.65605 | Down | transmembrane protein 220                                   |
| PDIA2        | -3.22693 | 1.22E-07 | 1.87E-06 | -5.64051 | Down | protein disulfideisomerase family A member 2                |
| GLUL         | -1.47258 | 1.39E-07 | 2.09E-06 | -5.61142 | Down | glutamate-ammonia ligase                                    |
| SLC2A12      | -2.17534 | 1.41E-07 | 2.1E-06  | -5.60948 | Down | solute carrier family 2 member 12                           |
| CXCL17       | -4.34036 | 1.48E-07 | 2.19E-06 | -5.5984  | Down | C-X-C motif chemokine ligand 17                             |
| HOMER2       | -2.62231 | 1.52E-07 | 2.24E-06 | -5.59209 | Down | homer scaffold protein 2                                    |
| KCNJ15       | -2.71143 | 1.87E-07 | 2.65E-06 | -5.54619 | Down | potassium inwardly rectifying channel subfamily J member 15 |
| SLC25A4      | -1.49727 | 1.89E-07 | 2.67E-06 | -5.54412 | Down | solute carrier family 25 member 4                           |
| FA2H         | -2.0741  | 2.03E-07 | 2.83E-06 | -5.52818 | Down | fatty acid 2-hydroxylase                                    |
| GC           | -2.25418 | 2.12E-07 | 2.93E-06 | -5.51839 | Down | GC vitamin D binding protein                                |
| AGPAT9       | -1.64544 | 2.19E-07 | 3.01E-06 | -5.511   | Down | 1-acylglycerol-3-phosphate O-acyltransferase 9              |
| CA2          | -4.04359 | 2.22E-07 | 3.03E-06 | -5.50885 | Down | carbonic anhydrase 2                                        |
| ANGPTL3      | -1.65764 | 2.23E-07 | 3.05E-06 | -5.50692 | Down | angiopoietin like 3                                         |
| ENAM         | -1.42603 | 2.25E-07 | 3.07E-06 | -5.50571 | Down | enamelin                                                    |
| CNTD1        | -1.15343 | 2.29E-07 | 3.11E-06 | -5.50141 | Down | cyclin N-terminal domain containing 1                       |
| C22orf23     | -1.43003 | 2.32E-07 | 3.14E-06 | -5.49836 | Down | chromosome 22 open reading frame 23                         |
| VSIG2        | -3.8996  | 2.36E-07 | 3.19E-06 | -5.49508 | Down | V-set and immunoglobulin domain containing 2                |
| DUSP19       | -1.39174 | 2.52E-07 | 3.37E-06 | -5.47987 | Down | dual specificity phosphatase 19                             |
| MYZAP        | -1.47779 | 2.64E-07 | 3.51E-06 | -5.4695  | Down | myocardial zonulaadherens protein                           |
| SLC9A1       | -1.43955 | 2.71E-07 | 3.58E-06 | -5.46391 | Down | solute carrier family 9 member A1                           |
| PKIB         | -2.38026 | 3.06E-07 | 3.97E-06 | -5.43677 | Down | cAMP-dependent protein kinase inhibitor beta                |
| PGC          | -7.92429 | 4.4E-07  | 5.39E-06 | -5.35497 | Down | progastricins                                               |

|              |          |          |          |          |      |                                                                                                                  |
|--------------|----------|----------|----------|----------|------|------------------------------------------------------------------------------------------------------------------|
| IGFALS       | -1.95174 | 4.6E-07  | 5.57E-06 | -5.34513 | Down | insulin like growth factor binding protein acid labile subunit                                                   |
| ALDH3A1      | -3.4432  | 4.75E-07 | 5.72E-06 | -5.33779 | Down | aldehyde dehydrogenase 3 family member A1                                                                        |
| SLC1A2       | -2.13118 | 4.75E-07 | 5.72E-06 | -5.33774 | Down | solute carrier family 1 member 2                                                                                 |
| MT1G         | -3.30769 | 5.35E-07 | 6.29E-06 | -5.31104 | Down | metallothionein 1G                                                                                               |
| CAPN9        | -3.65078 | 5.41E-07 | 6.36E-06 | -5.30841 | Down | calpain 9                                                                                                        |
| VSIG1        | -4.8252  | 5.42E-07 | 6.36E-06 | -5.3081  | Down | V-set and immunoglobulin domain containing 1 phosphatidylinositol specific phospholipase C X domain containing 3 |
| PLCXD3       | -2.25153 | 5.92E-07 | 6.87E-06 | -5.28771 | Down |                                                                                                                  |
| PAIP2B       | -2.13484 | 6.15E-07 | 7.08E-06 | -5.27904 | Down | poly(A) binding protein interacting protein 2B                                                                   |
| GPR64        | -1.89215 | 6.26E-07 | 7.18E-06 | -5.27515 | Down | G protein-coupled receptor 64                                                                                    |
| GPT          | -2.15929 | 6.45E-07 | 7.38E-06 | -5.2683  | Down | glutamic--pyruvic transaminase                                                                                   |
| CCBE1        | -1.23235 | 6.52E-07 | 7.44E-06 | -5.26599 | Down | collagen and calcium binding EGF domains 1                                                                       |
| RMST         | -1.51845 | 7.62E-07 | 8.5E-06  | -5.23044 | Down | rhabdomyosarcoma 2 associated transcript                                                                         |
| ANG          | -1.69955 | 7.93E-07 | 8.79E-06 | -5.22129 | Down | angiogenin                                                                                                       |
| AKR1B10      | -4.46934 | 8.3E-07  | 9.13E-06 | -5.21088 | Down | aldo-ketoreductase family 1 member B10                                                                           |
| PLLP         | -1.89685 | 8.58E-07 | 9.39E-06 | -5.20326 | Down | plasmolipin                                                                                                      |
| BRP44L       | -1.19484 | 8.7E-07  | 9.52E-06 | -5.19998 | Down | Mitochondrial Pyruvate Carrier 1)                                                                                |
| LYPD6B       | -2.52357 | 9.89E-07 | 1.06E-05 | -5.17051 | Down | LY6/PLAUR domain containing 6B                                                                                   |
| KLF2         | -1.43192 | 9.96E-07 | 1.07E-05 | -5.16887 | Down | Kruppel like factor 2                                                                                            |
| IRX5         | -1.3397  | 1E-06    | 1.08E-05 | -5.16708 | Down | iroquoishomeobox 5                                                                                               |
| SCUBE2       | -1.67574 | 1.08E-06 | 1.15E-05 | -5.14949 | Down | signal peptide, CUB domain and EGF like domain containing 2                                                      |
| PAPPA2       | -1.61521 | 1.1E-06  | 1.16E-05 | -5.14522 | Down | pappalysin 2                                                                                                     |
| CCDC64       | -1.15111 | 1.13E-06 | 1.19E-05 | -5.13998 | Down | Bicaudal D-related protein 1.                                                                                    |
| FAM177B      | -2.74114 | 1.18E-06 | 1.24E-05 | -5.12911 | Down | family with sequence similarity 177 member B                                                                     |
| TMEM92       | -1.54649 | 1.3E-06  | 1.34E-05 | -5.108   | Down | transmembrane protein 92                                                                                         |
| GSTA2        | -1.84896 | 1.31E-06 | 1.35E-05 | -5.10531 | Down | glutathione S-transferase alpha 2                                                                                |
| ITPKA        | -1.60035 | 1.35E-06 | 1.39E-05 | -5.09805 | Down | inositol-trisphosphate 3-kinase A                                                                                |
| CKMT2        | -1.93321 | 1.4E-06  | 1.43E-05 | -5.08937 | Down | creatine kinase, mitochondrial 2                                                                                 |
| KLHDC7A      | -2.13101 | 1.49E-06 | 1.5E-05  | -5.07556 | Down | kelch domain containing 7A                                                                                       |
| GCKR         | -1.62805 | 1.52E-06 | 1.52E-05 | -5.07171 | Down | glucokinase regulator                                                                                            |
| B4GALNT2     | -2.1561  | 1.58E-06 | 1.57E-05 | -5.0616  | Down | beta-1,4-N-acetyl-galactosaminyltransferase 2                                                                    |
| TMEM38A      | -1.51917 | 1.59E-06 | 1.58E-05 | -5.06108 | Down | transmembrane protein 38A                                                                                        |
| LOC100505633 | -2.28691 | 1.59E-06 | 1.58E-05 | -5.0601  | Down | #N/A                                                                                                             |
| RAB37        | -1.32868 | 1.71E-06 | 1.68E-05 | -5.04304 | Down | RAB37, member RAS oncogene family                                                                                |
| MT1F         | -2.10388 | 1.72E-06 | 1.69E-05 | -5.04199 | Down | metallothionein 1F                                                                                               |
| XYLT2        | -1.15806 | 1.79E-06 | 1.75E-05 | -5.03245 | Down | xylosyltransferase 2                                                                                             |
| TM7SF2       | -1.42717 | 1.8E-06  | 1.75E-05 | -5.03183 | Down | transmembrane 7 superfamily member 2                                                                             |
| ADHFE1       | -1.33    | 1.83E-06 | 1.78E-05 | -5.02717 | Down | alcohol dehydrogenase iron containing 1                                                                          |
| MUM1L1       | -1.15969 | 1.93E-06 | 1.86E-05 | -5.01471 | Down | melanoma associated antigen (mutated) 1-like 1.                                                                  |
| LOC284578    | -1.14675 | 2.01E-06 | 1.92E-05 | -5.00557 | Down | #N/A                                                                                                             |
| STYK1        | -1.66182 | 2.04E-06 | 1.93E-05 | -5.00288 | Down | serine/threonine/tyrosine kinase 1                                                                               |
| MTRNR2L2     | -1.22402 | 2.14E-06 | 2.02E-05 | -4.9906  | Down | MT-RNR2 like 2                                                                                                   |
| VILL         | -2.18985 | 2.3E-06  | 2.15E-05 | -4.97381 | Down | villin like                                                                                                      |



|          |          |          |          |          |      |                                                                 |
|----------|----------|----------|----------|----------|------|-----------------------------------------------------------------|
| SLC28A2  | -3.90596 | 2.71E-06 | 2.48E-05 | -4.9353  | Down | solute carrier family 28 member 2                               |
| HYAL1    | -2.01532 | 2.88E-06 | 2.62E-05 | -4.92076 | Down | hyaluronidase 1                                                 |
| EPN3     | -1.96052 | 2.93E-06 | 2.65E-05 | -4.91721 | Down | epsin 3                                                         |
| AADAC    | -3.09772 | 3.05E-06 | 2.74E-05 | -4.90747 | Down | arylacetamidodeacetylase                                        |
| SYTL5    | -2.99347 | 3.14E-06 | 2.81E-05 | -4.90027 | Down | synaptotagmin like 5                                            |
| KLK11    | -2.93302 | 3.15E-06 | 2.82E-05 | -4.89979 | Down | kallikrein related peptidase 11                                 |
| ALDOC    | -1.41944 | 3.27E-06 | 2.92E-05 | -4.89084 | Down | aldolase, fructose-bisphosphate C                               |
| GALE     | -1.36741 | 3.35E-06 | 2.97E-05 | -4.88489 | Down | UDP-galactose-4-epimerase                                       |
| GSTA1    | -3.20281 | 3.51E-06 | 3.08E-05 | -4.87396 | Down | glutathione S-transferase alpha 1                               |
| CYP2C8   | -1.2518  | 3.67E-06 | 3.2E-05  | -4.86337 | Down | cytochrome P450 family 2 subfamily C member 8                   |
| ID1      | -1.62166 | 3.8E-06  | 3.29E-05 | -4.85491 | Down | inhibitor of DNA binding 1, HLH protein                         |
| GPR155   | -1.87712 | 3.84E-06 | 3.32E-05 | -4.85253 | Down | G protein-coupled receptor 155                                  |
| BMP5     | -1.58937 | 3.91E-06 | 3.36E-05 | -4.84864 | Down | bone morphogenetic protein 5                                    |
| CAPN13   | -2.494   | 3.99E-06 | 3.42E-05 | -4.8437  | Down | calpain 13                                                      |
| CA9      | -3.29683 | 4.21E-06 | 3.58E-05 | -4.8304  | Down | carbonic anhydrase 9                                            |
| SCIN     | -2.33185 | 4.39E-06 | 3.7E-05  | -4.82083 | Down | scinderin                                                       |
| CYP2C18  | -2.59224 | 4.4E-06  | 3.71E-05 | -4.81989 | Down | cytochrome P450 family 2 subfamily C member 18                  |
| GCNT2    | -1.783   | 4.63E-06 | 3.86E-05 | -4.80777 | Down | glucosaminyl (N-acetyl) transferase 2 (I blood group)           |
| EDARADD  | -1.45242 | 4.85E-06 | 4.02E-05 | -4.79673 | Down | EDAR associated death domain                                    |
| ARL14    | -2.41024 | 5E-06    | 4.13E-05 | -4.78926 | Down | ADP ribosylation factor like GTPase 14                          |
| TMEM229A | -1.44756 | 5.11E-06 | 4.2E-05  | -4.78411 | Down | transmembrane protein 229A                                      |
| CIDEC    | -2.156   | 5.2E-06  | 4.26E-05 | -4.78008 | Down | cell death inducing DFFA like effector c                        |
| FOLR1    | -2.37016 | 5.65E-06 | 4.57E-05 | -4.75983 | Down | folate receptor alpha                                           |
| ELOVL6   | -1.57779 | 5.98E-06 | 4.8E-05  | -4.74624 | Down | ELOVL fatty acid elongase 6                                     |
| LIFR     | -1.94262 | 7.39E-06 | 5.74E-05 | -4.69476 | Down | LIF receptor subunit alpha                                      |
| IL17REL  | -1.47128 | 7.69E-06 | 5.93E-05 | -4.68519 | Down | interleukin 17 receptor E like                                  |
| C1orf210 | -1.31    | 7.82E-06 | 6.02E-05 | -4.68089 | Down | chromosome 1 open reading frame 210                             |
| SERPINA5 | -2.4327  | 7.98E-06 | 6.11E-05 | -4.67622 | Down | serpin family A member 5                                        |
| HRH2     | -1.32411 | 7.98E-06 | 6.11E-05 | -4.67605 | Down | histamine receptor H2                                           |
| TMEM171  | -1.47378 | 8.03E-06 | 6.14E-05 | -4.67468 | Down | transmembrane protein 171                                       |
| ADTRP    | -2.73817 | 8.32E-06 | 6.33E-05 | -4.66581 | Down | androgen dependent TFPI regulating protein                      |
| MYRIP    | -1.74826 | 8.37E-06 | 6.35E-05 | -4.66452 | Down | myosin VIIA and Rab interacting protein                         |
| RIPK4    | -1.17687 | 8.61E-06 | 6.52E-05 | -4.65744 | Down | receptor interacting serine/threonine kinase 4                  |
| FGA      | -3.49325 | 8.91E-06 | 6.71E-05 | -4.64908 | Down | fibrinogen alpha chain                                          |
| ENTPD5   | -1.43795 | 9.1E-06  | 6.83E-05 | -4.64388 | Down | ectonucleoside triphosphate diphosphohydrolase 5 (inactive)     |
| AKR1C3   | -2.24251 | 9.8E-06  | 7.26E-05 | -4.62586 | Down | aldo-ketoreductase family 1 member C3                           |
| ENPP5    | -1.60223 | 1.08E-05 | 7.85E-05 | -4.60287 | Down | ectonucleotidepyrophosphatase/phosphodiesterase family member 5 |
| ATP13A4  | -2.2645  | 1.11E-05 | 8.04E-05 | -4.59611 | Down | ATPase 13A4                                                     |
| KLF15    | -1.55586 | 1.13E-05 | 8.19E-05 | -4.59049 | Down | Kruppel like factor 15                                          |
| FAM3B    | -2.88357 | 1.13E-05 | 8.21E-05 | -4.58986 | Down | family with sequence similarity 3 member B                      |
| SLC9A2   | -2.44331 | 1.21E-05 | 8.67E-05 | -4.57391 | Down | solute carrier family 9 member A2                               |
| BEX5     | -1.19649 | 1.22E-05 | 8.75E-05 | -4.57104 | Down | brain expressed X-linked 5                                      |

|             |          |          |          |          |      |                                                                                                        |
|-------------|----------|----------|----------|----------|------|--------------------------------------------------------------------------------------------------------|
| OASL        | -1.75005 | 1.23E-05 | 8.81E-05 | -4.56899 | Down | 2'-5'-oligoadenylate synthetase like                                                                   |
| LOC400043   | -1.90787 | 1.3E-05  | 9.25E-05 | -4.55525 | Down | #N/A                                                                                                   |
| C1orf116    | -1.85534 | 1.33E-05 | 9.41E-05 | -4.54997 | Down | chromosome 1 open reading frame 116                                                                    |
| SMPD3       | -1.76857 | 1.35E-05 | 9.5E-05  | -4.54688 | Down | sphingomyelinphosphodiesterase 3                                                                       |
| SEC14L5     | -1.15197 | 1.44E-05 | 0.000101 | -4.53027 | Down | SEC14 like lipid binding 5                                                                             |
| ME1         | -1.28537 | 1.44E-05 | 0.000101 | -4.53004 | Down | malic enzyme 1                                                                                         |
| MTRNR2L8    | -1.13079 | 1.55E-05 | 0.000107 | -4.51279 | Down | MT-RNR2 like 8                                                                                         |
| SNORD116-20 | -1.14964 | 1.55E-05 | 0.000107 | -4.51266 | Down | small nucleolar RNA, C/D box 116-20                                                                    |
| FER1L6      | -3.70792 | 1.6E-05  | 0.00011  | -4.50424 | Down | fer-1 like family member 6                                                                             |
| NWD1        | -1.62763 | 1.74E-05 | 0.000118 | -4.48368 | Down | NACHT and WD repeat domain containing 1                                                                |
| IL1R2       | -2.15474 | 1.77E-05 | 0.00012  | -4.47909 | Down | interleukin 1 receptor type 2                                                                          |
| KLF4        | -1.5749  | 1.87E-05 | 0.000125 | -4.46575 | Down | Kruppel like factor 4                                                                                  |
| ORM2        | -2.06661 | 1.87E-05 | 0.000125 | -4.46517 | Down | orosomuroid 2                                                                                          |
| AZGP1       | -2.93525 | 1.99E-05 | 0.000132 | -4.44919 | Down | alpha-2-glycoprotein 1, zinc-binding                                                                   |
| TMEM151A    | -1.17211 | 2.13E-05 | 0.00014  | -4.43233 | Down | transmembrane protein 151A                                                                             |
| ENTPD3      | -1.41639 | 2.14E-05 | 0.00014  | -4.4308  | Down | ectonucleoside triphosphate diphosphohydrolase 3                                                       |
| RNASE4      | -1.49833 | 2.2E-05  | 0.000144 | -4.42433 | Down | ribonuclease A family member 4                                                                         |
| RASSF6      | -1.61314 | 2.52E-05 | 0.000161 | -4.39047 | Down | Ras association domain family member 6                                                                 |
| ANXA10      | -4.16183 | 2.56E-05 | 0.000163 | -4.38594 | Down | annexin A10                                                                                            |
| MSMB        | -3.75333 | 2.71E-05 | 0.000172 | -4.37138 | Down | microseminoprotein beta                                                                                |
| CYB5A       | -1.14489 | 2.74E-05 | 0.000173 | -4.36861 | Down | cytochrome b5 type A                                                                                   |
| NQO1        | -1.86364 | 2.92E-05 | 0.000183 | -4.35221 | Down | NAD(P)H quinone dehydrogenase 1                                                                        |
| FMO5        | -1.74122 | 2.97E-05 | 0.000185 | -4.34798 | Down | flavin containing dimethylanilinemonooxygenase 5                                                       |
| DPT         | -2.18519 | 2.99E-05 | 0.000186 | -4.34646 | Down | dermatopontin                                                                                          |
| S100P       | -2.79699 | 3.12E-05 | 0.000193 | -4.33526 | Down | S100 calcium binding protein P                                                                         |
| MIA2        | -1.94287 | 3.25E-05 | 0.0002   | -4.32543 | Down | MIA SH3 domain ER export factor 2<br>UDP-GlcNAc:betaGal beta-1,3-N-<br>acetylglucosaminyltransferase 6 |
| B3GNT6      | -3.29988 | 3.46E-05 | 0.00021  | -4.30883 | Down |                                                                                                        |
| PAQR8       | -1.33801 | 3.49E-05 | 0.000212 | -4.30662 | Down | progesterin and adipoQ receptor family member 8                                                        |
| C1orf130    | -1.78106 | 3.65E-05 | 0.00022  | -4.2952  | Down | chromosome 1 open reading frame 130                                                                    |
| PP7080      | -1.68017 | 3.69E-05 | 0.000223 | -4.29224 | Down | uncharacterized LOC25845                                                                               |
| SULT1C2     | -2.71188 | 4.53E-05 | 0.000264 | -4.23934 | Down | sulfotransferase family 1C member 2                                                                    |
| TPD52L1     | -1.54408 | 4.53E-05 | 0.000264 | -4.23928 | Down | TPD52 like 1                                                                                           |
| SULT1B1     | -2.5618  | 4.7E-05  | 0.000272 | -4.22996 | Down | sulfotransferase family 1B member 1                                                                    |
| HPN         | -2.17976 | 5.18E-05 | 0.000297 | -4.20434 | Down | hepsin                                                                                                 |
| KRT20       | -4.19415 | 5.25E-05 | 0.0003   | -4.2009  | Down | keratin 20                                                                                             |
| ALDH1A1     | -2.19118 | 5.58E-05 | 0.000316 | -4.18529 | Down | aldehyde dehydrogenase 1 family member A1                                                              |
| FER1L6-AS1  | -1.4067  | 5.62E-05 | 0.000318 | -4.18345 | Down | FER1L6 antisense RNA 1                                                                                 |
| ARHGDI3     | -1.37568 | 5.63E-05 | 0.000319 | -4.18263 | Down | Rho GDP dissociation inhibitor gamma                                                                   |
| TST         | -1.30825 | 5.94E-05 | 0.000333 | -4.16892 | Down | thiosulfate sulfurtransferase                                                                          |
| KIAA0895    | -1.34672 | 5.99E-05 | 0.000336 | -4.16645 | Down | KIAA0895                                                                                               |
| RPS6KA6     | -1.4841  | 6.19E-05 | 0.000344 | -4.15812 | Down | ribosomal protein S6 kinase A6                                                                         |
| CHGB        | -2.2368  | 6.5E-05  | 0.000359 | -4.14492 | Down | chromogranin B                                                                                         |

|          |          |          |          |          |      |                                                            |
|----------|----------|----------|----------|----------|------|------------------------------------------------------------|
| COL4A6   | -1.84882 | 6.59E-05 | 0.000363 | -4.14163 | Down | collagen type IV alpha 6 chain                             |
| ECHDC3   | -1.70417 | 6.94E-05 | 0.00038  | -4.12764 | Down | enoyl-CoA hydratase domain containing 3                    |
| INSIG1   | -1.1514  | 6.98E-05 | 0.000381 | -4.1261  | Down | insulin induced gene 1                                     |
| EPB41L4B | -1.50303 | 7.46E-05 | 0.000404 | -4.1086  | Down | erythrocyte membrane protein band 4.1 like 4B              |
| IGJ      | -3.06899 | 7.5E-05  | 0.000405 | -4.10734 | Down | #N/A                                                       |
| PBLD     | -1.70062 | 7.53E-05 | 0.000407 | -4.10625 | Down | phenazine biosynthesis like protein domain containing      |
| MT1E     | -2.0273  | 7.77E-05 | 0.000418 | -4.09782 | Down | metallothionein 1E                                         |
| LTF      | -3.65068 | 7.95E-05 | 0.000427 | -4.09188 | Down | lactotransferrin                                           |
| PALM3    | -1.80821 | 8.06E-05 | 0.000432 | -4.08804 | Down | paralemmin 3                                               |
| ADAMTS15 | -1.7918  | 8.1E-05  | 0.000433 | -4.08687 | Down | ADAM metalloproteinase with thrombospondin type 1 motif 15 |
| TMPRSS2  | -1.68379 | 8.75E-05 | 0.000464 | -4.06631 | Down | transmembrane serine protease 2                            |
| ARHGEF37 | -1.43569 | 9.08E-05 | 0.000479 | -4.05636 | Down | Rho guanine nucleotide exchange factor 37                  |
| PRDM16   | -1.44097 | 9.11E-05 | 0.00048  | -4.05544 | Down | PR/SET domain 16                                           |
| SNORD22  | -1.19739 | 9.2E-05  | 0.000484 | -4.05279 | Down | small nucleolar RNA, C/D box 22                            |
| STX19    | -1.42672 | 0.000101 | 0.000525 | -4.02756 | Down | syntaxin 19                                                |
| SLC16A7  | -1.5037  | 0.000103 | 0.000533 | -4.02328 | Down | solute carrier family 16 member 7                          |
| SELENBP1 | -1.60959 | 0.000106 | 0.000546 | -4.01555 | Down | selenium binding protein 1                                 |
| FNDC5    | -1.181   | 0.00011  | 0.000564 | -4.00544 | Down | fibronectin type III domain containing 5                   |
| TTR      | -1.71577 | 0.00011  | 0.000564 | -4.00522 | Down | transthyretin                                              |
| BCAS1    | -2.74005 | 0.00011  | 0.000564 | -4.00512 | Down | breast carcinoma amplified sequence 1                      |
| C19orf77 | -2.20692 | 0.000121 | 0.000612 | -3.97948 | Down | #N/A                                                       |
| SERPINA4 | -2.36418 | 0.000124 | 0.000626 | -3.97258 | Down | serpin family A member 4                                   |
| FSIP2    | -1.98347 | 0.000124 | 0.000627 | -3.97219 | Down | fibrous sheath interacting protein 2                       |
| IGSF9    | -1.55798 | 0.000131 | 0.000659 | -3.95695 | Down | immunoglobulin superfamily member 9                        |
| CLDN18   | -3.33422 | 0.000136 | 0.000676 | -3.94788 | Down | claudin 18                                                 |
| SUSD4    | -1.40629 | 0.000137 | 0.000683 | -3.94471 | Down | sushi domain containing 4                                  |
| AMPD1    | -1.20089 | 0.000148 | 0.000725 | -3.92525 | Down | adenosine monophosphate deaminase 1                        |
| FOXQ1    | -1.91873 | 0.000149 | 0.000729 | -3.92334 | Down | forkhead box Q1                                            |
| PTGR1    | -1.14721 | 0.000152 | 0.000746 | -3.91648 | Down | prostaglandin reductase 1                                  |
| C11orf9  | -1.27328 | 0.000155 | 0.000758 | -3.91106 | Down | Myelin Regulatory Factor; Myelin                           |
| GPR110   | -2.11364 | 0.000156 | 0.00076  | -3.91058 | Down | G-protein coupled receptor 110 i                           |
| MT1X     | -1.41507 | 0.000158 | 0.000771 | -3.9061  | Down | metallothionein 1X                                         |
| UPK1B    | -2.46209 | 0.000166 | 0.0008   | -3.89367 | Down | uroplakin 1B                                               |
| DHCR24   | -1.30452 | 0.000173 | 0.000831 | -3.88192 | Down | 24-dehydrocholesterol reductase                            |
| EYA2     | -1.67614 | 0.000177 | 0.000847 | -3.87609 | Down | EYA transcriptional coactivator and phosphatase 2          |
| HAPLN1   | -1.94491 | 0.000182 | 0.000869 | -3.86761 | Down | hyaluronan and proteoglycan link protein 1                 |
| PTGER3   | -1.63099 | 0.000187 | 0.000891 | -3.85982 | Down | prostaglandin E receptor 3                                 |
| PHGR1    | -2.78903 | 0.000195 | 0.000923 | -3.84833 | Down | proline, histidine and glycine rich 1                      |
| RIMS4    | -1.15833 | 0.000195 | 0.000924 | -3.8481  | Down | regulating synaptic membrane exocytosis 4                  |
| ODAM     | -1.80133 | 0.000196 | 0.000925 | -3.8476  | Down | odontogenic, ameloblast associated                         |
| ALDOB    | -3.06807 | 0.0002   | 0.000939 | -3.84236 | Down | aldolase, fructose-bisphosphate B                          |
| GATA6    | -1.17262 | 0.000204 | 0.000958 | -3.83569 | Down | GATA binding protein 6                                     |

|           |          |          |          |          |      |                                                          |
|-----------|----------|----------|----------|----------|------|----------------------------------------------------------|
| MUC6      | -3.92776 | 0.000222 | 0.001027 | -3.8129  | Down | mucin 6, oligomeric mucus/gel-forming                    |
| SNORA50   | -1.1526  | 0.000226 | 0.001043 | -3.80799 | Down | small nucleolar RNA, H/ACA box 50A                       |
| PLAC8     | -1.89979 | 0.000228 | 0.001051 | -3.80548 | Down | placenta associated 8                                    |
| ANO7      | -1.82482 | 0.000231 | 0.001063 | -3.80137 | Down | anoctamin 7                                              |
| ZBTB7C    | -1.92666 | 0.000234 | 0.001072 | -3.79863 | Down | zinc finger and BTB domain containing 7C                 |
| RORC      | -1.83042 | 0.000236 | 0.001083 | -3.79524 | Down | RAR related orphan receptor C                            |
| DUOXA2    | -2.3418  | 0.000241 | 0.001099 | -3.79004 | Down | dual oxidase maturation factor 2                         |
| LOC643201 | -1.30305 | 0.000248 | 0.001127 | -3.78209 | Down | centrosomal protein 192kDa pseudogene                    |
| CTSE      | -3.03202 | 0.00025  | 0.001137 | -3.77916 | Down | cathepsin E                                              |
| GPT2      | -1.25616 | 0.000255 | 0.001154 | -3.77415 | Down | glutamic--pyruvic transaminase 2                         |
| SH3BGRL2  | -1.24745 | 0.000258 | 0.001164 | -3.77109 | Down | SH3 domain binding glutamate rich protein like 2         |
| SLC9A3    | -2.3467  | 0.000264 | 0.001191 | -3.76382 | Down | solute carrier family 9 member A3                        |
| CCRL1     | -1.28784 | 0.000265 | 0.001192 | -3.76351 | Down | C-C chemokine receptor type 11 i                         |
| FAM174B   | -1.19216 | 0.000269 | 0.001206 | -3.75955 | Down | family with sequence similarity 174 member B             |
| FER1L4    | -1.77732 | 0.000271 | 0.001215 | -3.75724 | Down | fer-1 like family member 4 (pseudogene)                  |
| LEPREL1   | -1.43316 | 0.000273 | 0.001224 | -3.75483 | Down | LEUCINE- AND PROLINE-ENRICHED<br>PROTEOGLYCAN 1          |
| PDZD3     | -1.49069 | 0.000279 | 0.001245 | -3.74868 | Down | PDZ domain containing 3                                  |
| DSC2      | -1.30164 | 0.000283 | 0.001261 | -3.74465 | Down | desmocollin 2                                            |
| A4GNT     | -2.1448  | 0.000283 | 0.001262 | -3.74437 | Down | alpha-1,4-N-acetylglucosaminyltransferase                |
| BHMT      | -1.13063 | 0.00029  | 0.001288 | -3.73761 | Down | betaine--homocysteine S-methyltransferase                |
| SGK2      | -1.71285 | 0.000299 | 0.001319 | -3.72954 | Down | serum/glucocorticoid regulated kinase 2                  |
| SYTL2     | -1.43896 | 0.000303 | 0.001336 | -3.72537 | Down | synaptotagmin like 2                                     |
| SNORA3    | -1.194   | 0.00031  | 0.001364 | -3.71893 | Down | mall nucleolar RNA, H/ACA box 3A                         |
| F2RL1     | -1.18109 | 0.000312 | 0.00137  | -3.71764 | Down | F2R like trypsin receptor 1                              |
| ADH1C     | -3.13978 | 0.000315 | 0.001384 | -3.71434 | Down | alcohol dehydrogenase 1C (class I), gamma<br>polypeptide |
| FOXA3     | -1.27364 | 0.000319 | 0.001397 | -3.71123 | Down | forkhead box A3                                          |
| DUOX2     | -3.13093 | 0.000331 | 0.001442 | -3.70071 | Down | dual oxidase 2                                           |
| ADAM28    | -1.57232 | 0.000339 | 0.001472 | -3.69348 | Down | ADAM metallopeptidase domain 28                          |
| APOC3     | -1.66171 | 0.000357 | 0.001538 | -3.67918 | Down | apolipoprotein C3                                        |
| RAP1GAP   | -1.95704 | 0.00037  | 0.001589 | -3.66858 | Down | RAP1 GTPase activating protein                           |
| PTPRZ1    | -1.64025 | 0.000393 | 0.001671 | -3.65134 | Down | protein tyrosine phosphatase receptor type Z1            |
| SCG3      | -1.34963 | 0.000393 | 0.001672 | -3.65109 | Down | secretogranin III                                        |
| CYP2S1    | -1.41489 | 0.000412 | 0.001738 | -3.63761 | Down | cytochrome P450 family 2 subfamily S member 1            |
| CAPN8     | -2.0061  | 0.000422 | 0.001772 | -3.63093 | Down | calpain 8                                                |
| TCEAL2    | -1.17618 | 0.00043  | 0.001802 | -3.62531 | Down | transcription elongation factor A like 2                 |
| SNORA47   | -1.38927 | 0.000439 | 0.00183  | -3.61969 | Down | small nucleolar RNA, H/ACA box 47                        |
| SNORA37   | -1.43524 | 0.000462 | 0.001913 | -3.60511 | Down | small nucleolar RNA, H/ACA box 37                        |
| RAB27B    | -1.65807 | 0.000474 | 0.001953 | -3.59755 | Down | RAB27B, member RAS oncogene family                       |
| SERPINB7  | -1.42666 | 0.000478 | 0.001967 | -3.59519 | Down | serpin family B member 7                                 |
| LINC00261 | -2.80671 | 0.00051  | 0.002079 | -3.57612 | Down | long intergenic non-protein coding RNA 261               |
| DUOX1     | -1.35608 | 0.000547 | 0.002208 | -3.55587 | Down | dual oxidase 1                                           |
| METTL7A   | -1.26112 | 0.000558 | 0.002246 | -3.55005 | Down | methyltransferase like 7A                                |

|           |          |          |          |          |      |                                                                          |
|-----------|----------|----------|----------|----------|------|--------------------------------------------------------------------------|
| RIMS1     | -1.58304 | 0.000575 | 0.002308 | -3.5411  | Down | regulating synaptic membrane exocytosis 1                                |
| OXCT1     | -1.26717 | 0.000588 | 0.002352 | -3.53471 | Down | 3-oxoacid CoA-transferase 1                                              |
| TCN1      | -2.79339 | 0.00061  | 0.002423 | -3.52398 | Down | transcobalamin 1                                                         |
| KCNQ1     | -1.51998 | 0.000631 | 0.002495 | -3.51407 | Down | potassium voltage-gated channel subfamily Q member 1                     |
| FGG       | -2.32003 | 0.000661 | 0.002599 | -3.50019 | Down | fibrinogen gamma chain                                                   |
| C11orf92  | -1.84043 | 0.000671 | 0.002633 | -3.49577 | Down | chromosome 11 open reading frame 92                                      |
| FBP1      | -1.14801 | 0.000688 | 0.002689 | -3.48862 | Down | fructose-bisphosphatase 1                                                |
| TRNP1     | -1.81251 | 0.000691 | 0.002698 | -3.48731 | Down | TMF1 regulated nuclear protein 1                                         |
| C6orf58   | -2.90429 | 0.000693 | 0.002704 | -3.48651 | Down | chromosome 6 open reading frame 58                                       |
| NR0B2     | -1.64026 | 0.000709 | 0.002755 | -3.47946 | Down | nuclear receptor subfamily 0 group B member 2                            |
| CYP3A5    | -1.70546 | 0.000712 | 0.002767 | -3.47815 | Down | cytochrome P450 family 3 subfamily A member 5                            |
| CLDN23    | -1.34669 | 0.000741 | 0.002862 | -3.46652 | Down | claudin 23                                                               |
| C12orf36  | -1.93304 | 0.000744 | 0.002868 | -3.46536 | Down | Chromosome 12 Open Reading Frame 36                                      |
| CCL28     | -1.67094 | 0.00075  | 0.002888 | -3.46283 | Down | C-C motif chemokine ligand 28                                            |
| CYP4F12   | -1.402   | 0.000786 | 0.003005 | -3.44906 | Down | cytochrome P450 family 4 subfamily F member 12                           |
| COL6A5    | -1.36147 | 0.000808 | 0.003077 | -3.44061 | Down | collagen type VI alpha 5 chain                                           |
| LOC729966 | -1.77488 | 0.000859 | 0.003239 | -3.4224  | Down | uncharacterized LOC729966                                                |
| C1orf115  | -1.17373 | 0.000863 | 0.003251 | -3.42107 | Down | chromosome 1 open reading frame 115                                      |
| PIK3C2G   | -2.69778 | 0.000864 | 0.003254 | -3.42067 | Down | phosphatidylinositol-4-phosphate 3-kinase catalytic subunit type 2 gamma |
| C4orf19   | -1.25061 | 0.000882 | 0.003308 | -3.4146  | Down | chromosome 4 open reading frame 19                                       |
| TTC39A    | -1.29875 | 0.000889 | 0.003326 | -3.4122  | Down | tetratricopeptide repeat domain 39A                                      |
| HS6ST3    | -1.35206 | 0.000968 | 0.003578 | -3.38646 | Down | heparansulfate 6-O-sulfotransferase 3                                    |
| GALNT6    | -1.21049 | 0.000971 | 0.003586 | -3.38548 | Down | polypeptide N-acetylgalactosaminyltransferase 6                          |
| CYP2C9    | -1.28115 | 0.000978 | 0.003607 | -3.38327 | Down | cytochrome P450 family 2 subfamily C member 9                            |
| CD36      | -1.13239 | 0.001055 | 0.003845 | -3.36046 | Down | CD36 molecule                                                            |
| EPS8L1    | -1.2057  | 0.001063 | 0.00387  | -3.35821 | Down | EPS8 like 1                                                              |
| LIPH      | -1.57886 | 0.001145 | 0.004123 | -3.33537 | Down | lipase H                                                                 |
| SHISA6    | -1.15846 | 0.001155 | 0.004152 | -3.33279 | Down | shisa family member 6                                                    |
| RASEF     | -1.29797 | 0.001213 | 0.004327 | -3.31793 | Down | RAS and EF-hand domain containing                                        |
| IRX2      | -1.74965 | 0.00123  | 0.004377 | -3.31355 | Down | iroquoishomeobox 2                                                       |
| PTPRR     | -1.41316 | 0.001231 | 0.004379 | -3.31334 | Down | protein tyrosine phosphatase receptor type R                             |
| PTPRN2    | -1.56508 | 0.001244 | 0.004415 | -3.3101  | Down | protein tyrosine phosphatase receptor type N2                            |
| APOBEC1   | -1.28203 | 0.00126  | 0.004464 | -3.30616 | Down | apolipoprotein B mRNA editing enzyme catalytic subunit 1                 |
| ADAMTSL1  | -1.20975 | 0.001286 | 0.004546 | -3.30003 | Down | ADAMTS like 1                                                            |
| GDPD2     | -1.15658 | 0.001354 | 0.004744 | -3.28413 | Down | glycerophosphodiesterphosphodiesterase domain containing 2               |
| SCGN      | -1.29653 | 0.001363 | 0.004774 | -3.28206 | Down | secretagogin, EF-hand calcium binding protein                            |
| SLC16A9   | -1.48478 | 0.001427 | 0.004971 | -3.26778 | Down | solute carrier family 16 member 9                                        |
| SEMA3B    | -1.1954  | 0.00143  | 0.004979 | -3.2672  | Down | semaphorin 3B                                                            |
| HAS3      | -1.47447 | 0.001431 | 0.004982 | -3.2669  | Down | hyaluronan synthase 3                                                    |
| CA4       | -1.14208 | 0.00149  | 0.005155 | -3.25439 | Down | carbonic anhydrase 4                                                     |
| ERBB4     | -1.14567 | 0.001495 | 0.00517  | -3.25341 | Down | erb-b2 receptor tyrosine kinase 4                                        |
| FOXA2     | -1.37138 | 0.001522 | 0.005254 | -3.2479  | Down | forkhead box A2                                                          |

|           |          |          |          |          |      |                                                                                    |
|-----------|----------|----------|----------|----------|------|------------------------------------------------------------------------------------|
| BTNL8     | -1.63429 | 0.001537 | 0.005301 | -3.24474 | Down | butyrophilin like 8                                                                |
| LRRC66    | -1.59439 | 0.001541 | 0.005312 | -3.24398 | Down | leucine rich repeat containing 66                                                  |
| SOWAHA    | -1.27464 | 0.001575 | 0.005403 | -3.23724 | Down | sosondowahankyrin repeat domain family member A                                    |
| DHRS9     | -1.36517 | 0.001582 | 0.005423 | -3.23592 | Down | dehydrogenase/reductase 9                                                          |
| MRAP2     | -1.44774 | 0.001626 | 0.005553 | -3.22728 | Down | melanocortin 2 receptor accessory protein 2                                        |
| B3GNT7    | -1.4936  | 0.00165  | 0.005622 | -3.22266 | Down | UDP-GlcNAc:betaGal beta-1,3-N-acetylglucosaminyltransferase 7                      |
| MT1H      | -1.63135 | 0.001743 | 0.005902 | -3.20546 | Down | metallothionein 1H                                                                 |
| LOC440335 | -1.24996 | 0.001799 | 0.006059 | -3.19566 | Down | #N/A                                                                               |
| TSPAN1    | -2.13042 | 0.00197  | 0.006562 | -3.16689 | Down | tetraspanin 1                                                                      |
| CYP2C19   | -1.37071 | 0.00198  | 0.006589 | -3.16533 | Down | cytochrome P450 family 2 subfamily C member 19                                     |
| FCGBP     | -3.19545 | 0.002032 | 0.006728 | -3.15716 | Down | Fc fragment of IgG binding protein                                                 |
| NCAM1     | -1.23177 | 0.002096 | 0.006903 | -3.14733 | Down | neural cell adhesion molecule 1                                                    |
| HHLA2     | -1.782   | 0.00214  | 0.007023 | -3.14069 | Down | HERV-H LTR-associating 2                                                           |
| PRIMA1    | -1.13115 | 0.002157 | 0.007072 | -3.13824 | Down | proline rich membrane anchor 1                                                     |
| RGN       | -1.21003 | 0.002162 | 0.007086 | -3.13742 | Down | regucalcin                                                                         |
| UGT1A6    | -1.41003 | 0.002217 | 0.007243 | -3.12945 | Down | UDP glucuronosyltransferase family 1 member A6                                     |
| TFCP2L1   | -1.4672  | 0.00227  | 0.007397 | -3.12195 | Down | transcription factor CP2 like 1                                                    |
| FXYD3     | -1.4859  | 0.00227  | 0.007398 | -3.12187 | Down | FXYD domain containing ion transport regulator 3                                   |
| MIR650    | -2.29328 | 0.002276 | 0.007414 | -3.1211  | Down | microRNA 650                                                                       |
| FAM189A2  | -1.27394 | 0.002401 | 0.007765 | -3.10391 | Down | family with sequence similarity 189 member A2                                      |
| SOX2      | -1.62091 | 0.00252  | 0.008094 | -3.08844 | Down | SRY-box transcription factor 2                                                     |
| ORM1      | -1.4435  | 0.00267  | 0.008505 | -3.06973 | Down | orosomucoid 1                                                                      |
| F13A1     | -1.57304 | 0.002836 | 0.008952 | -3.05016 | Down | coagulation factor XIII A chain                                                    |
| APOA1     | -1.95002 | 0.003046 | 0.009535 | -3.02696 | Down | apolipoprotein A1                                                                  |
| ANKRD22   | -1.13226 | 0.003091 | 0.009655 | -3.02212 | Down | ankyrin repeat domain 22                                                           |
| RHBDL2    | -1.23177 | 0.003283 | 0.01018  | -3.00237 | Down | rhomboid like 2                                                                    |
| CLEC3B    | -1.21628 | 0.003554 | 0.010891 | -2.9762  | Down | C-type lectin domain family 3 member B                                             |
| SCARA5    | -1.54597 | 0.003923 | 0.011848 | -2.94344 | Down | scavenger receptor class A member 5                                                |
| GGT6      | -1.7999  | 0.004042 | 0.012143 | -2.93348 | Down | gamma-glutamyltransferase 6                                                        |
| MAMDC2    | -1.26013 | 0.00407  | 0.012211 | -2.93121 | Down | MAM domain containing 2                                                            |
| XK        | -1.23683 | 0.004074 | 0.012219 | -2.93089 | Down | X-linked Kx blood group glycerophosphodiesterphosphodiesterase domain containing 3 |
| GDPD3     | -1.23128 | 0.004159 | 0.012421 | -2.92401 | Down |                                                                                    |
| TMEM100   | -1.13751 | 0.004302 | 0.012787 | -2.91261 | Down | transmembrane protein 100                                                          |
| LEPR      | -1.176   | 0.004368 | 0.012955 | -2.90755 | Down | leptin receptor                                                                    |
| IGFBP2    | -1.6738  | 0.00443  | 0.01311  | -2.90282 | Down | insulin like growth factor binding protein 2                                       |
| DEFB1     | -1.382   | 0.00448  | 0.013228 | -2.89902 | Down | defensin beta 1                                                                    |
| SNORD94   | -1.18429 | 0.004833 | 0.014103 | -2.87341 | Down | small nucleolar RNA, C/D box 94                                                    |
| SLC4A4    | -1.44856 | 0.004885 | 0.014233 | -2.86979 | Down | solute carrier family 4 member 4                                                   |
| CXADR     | -1.14718 | 0.004919 | 0.014319 | -2.86739 | Down | CXADR Ig-like cell adhesion molecule                                               |
| TFR2      | -1.22223 | 0.004955 | 0.014407 | -2.86497 | Down | transferrin receptor 2                                                             |
| ANO5      | -1.32076 | 0.004958 | 0.014415 | -2.8647  | Down | anoctamin 5                                                                        |
| COL17A1   | -1.95731 | 0.005127 | 0.014843 | -2.85333 | Down | collagen type XVII alpha 1 chain                                                   |



|            |          |          |          |          |      |                                                           |
|------------|----------|----------|----------|----------|------|-----------------------------------------------------------|
| GCNT1      | -1.29201 | 0.005264 | 0.01517  | -2.84436 | Down | glucosaminyl (N-acetyl) transferase 1                     |
| C6         | -1.22604 | 0.005537 | 0.015827 | -2.82708 | Down | complement C6                                             |
| C11orf86   | -1.4605  | 0.005632 | 0.016046 | -2.82121 | Down | chromosome 11 open reading frame 86                       |
| PROM2      | -1.70208 | 0.005709 | 0.016221 | -2.81653 | Down | prominin 2                                                |
| BPIFB1     | -2.89391 | 0.00604  | 0.017023 | -2.79712 | Down | BPI fold containing family B member 1                     |
| MUC1       | -1.55602 | 0.006157 | 0.017299 | -2.79049 | Down | mucin 1, cell surface associated                          |
| HBB        | -1.33296 | 0.006208 | 0.017414 | -2.78764 | Down | hemoglobin subunit beta                                   |
| MLPH       | -1.50248 | 0.006316 | 0.017668 | -2.7817  | Down | melanophilin                                              |
| CDH2       | -1.13276 | 0.006463 | 0.018017 | -2.77372 | Down | cadherin 2                                                |
| SLC15A1    | -1.46194 | 0.006776 | 0.018776 | -2.75724 | Down | solute carrier family 15 member 1                         |
| TESC       | -1.47782 | 0.007011 | 0.019317 | -2.74531 | Down | tescalcin                                                 |
| POU2AF1    | -1.18723 | 0.007045 | 0.019394 | -2.74364 | Down | POU class 2 homeobox associating factor 1                 |
| FGB        | -1.75768 | 0.007504 | 0.020432 | -2.72147 | Down | fibrinogen beta chain                                     |
| UGT1A10    | -1.42624 | 0.007717 | 0.020903 | -2.7116  | Down | UDP glucuronosyltransferase family 1 member A10           |
| PRKAA2     | -1.2771  | 0.00781  | 0.021113 | -2.70737 | Down | protein kinase AMP-activated catalytic subunit alpha 2    |
| SPDEF      | -1.53032 | 0.008048 | 0.021653 | -2.69677 | Down | SAM pointed domain containing ETS transcription factor    |
| HGD        | -1.25298 | 0.008766 | 0.023318 | -2.66635 | Down | homogentisate 1,2-dioxygenase                             |
| PRLR       | -1.27219 | 0.008797 | 0.023391 | -2.66507 | Down | prolactin receptor                                        |
| GABRB3     | -1.47248 | 0.00886  | 0.023541 | -2.66251 | Down | gamma-aminobutyric acid type A receptor beta3 subunit     |
| PLIN4      | -1.23827 | 0.00932  | 0.024589 | -2.6444  | Down | perilipin 4                                               |
| REG3A      | -2.83122 | 0.00993  | 0.025962 | -2.62155 | Down | regenerating family member 3 alpha                        |
| B3GALT5    | -1.68133 | 0.009937 | 0.025979 | -2.62127 | Down | beta-1,3-galactosyltransferase 5                          |
| GALNT5     | -1.26116 | 0.010092 | 0.026304 | -2.61569 | Down | polypeptide N-acetylgalactosaminyltransferase 5           |
| APOA4      | -1.79981 | 0.010478 | 0.027174 | -2.60206 | Down | apolipoprotein A4                                         |
| TM6SF2     | -1.15162 | 0.010774 | 0.027797 | -2.59193 | Down | transmembrane 6 superfamily member 2                      |
| CGNL1      | -1.18772 | 0.010931 | 0.028148 | -2.58664 | Down | cingulin like 1                                           |
| CDHR2      | -1.72899 | 0.011645 | 0.02968  | -2.56348 | Down | cadherin related family member 2                          |
| CYP3A4     | -1.40007 | 0.012414 | 0.03131  | -2.53991 | Down | cytochrome P450 family 3 subfamily A member 4             |
| CXCL14     | -1.53213 | 0.01284  | 0.032216 | -2.52742 | Down | C-X-C motif chemokine ligand 14                           |
| KIF1A      | -1.13421 | 0.013076 | 0.032717 | -2.52066 | Down | kinesin family member 1A                                  |
| MUC5B      | -2.34029 | 0.013457 | 0.033532 | -2.50997 | Down | mucin 5B, oligomeric mucus/gel-forming                    |
| PRSS8      | -1.17934 | 0.013595 | 0.033806 | -2.50614 | Down | serine protease 8                                         |
| AQP5       | -1.73911 | 0.01516  | 0.037052 | -2.46524 | Down | aquaporin 5                                               |
| FOXA1      | -1.13176 | 0.015252 | 0.037252 | -2.46297 | Down | forkhead box A1                                           |
| SLPI       | -1.50988 | 0.016553 | 0.039947 | -2.43191 | Down | secretory leukocyte peptidase inhibitor                   |
| CMBL       | -1.29617 | 0.016773 | 0.040392 | -2.42687 | Down | carboxymethylenbutenolidase homolog                       |
| MST1P9     | -1.20601 | 0.017788 | 0.042418 | -2.40436 | Down | #N/A                                                      |
| ST6GALNAC1 | -1.45659 | 0.018428 | 0.043721 | -2.39074 | Down | ST6 N-acetylgalactosaminide alpha-2,6-sialyltransferase 1 |
| KIAA1324   | -1.66186 | 0.019482 | 0.045772 | -2.36921 | Down | KIAA1324                                                  |
| MAOA       | -1.2488  | 0.020833 | 0.048467 | -2.34308 | Down | monoamine oxidase A                                       |

**Table 3** The enriched pathway terms of the up regulated differentially expressed genes

| BIOCYC     |                                             |          |          |          |            |            |                                                                                                                                                                              |
|------------|---------------------------------------------|----------|----------|----------|------------|------------|------------------------------------------------------------------------------------------------------------------------------------------------------------------------------|
| Pathway ID | Pathway Name                                | P-value  | FDR B&H  | FDR B&Y  | Bonferroni | Gene Count | Gene                                                                                                                                                                         |
| 782401     | pyrimidine deoxyribonucleosides degradation | 8.43E-03 | 2.69E-01 | 1.00E+00 | 3.46E-01   | 2          | UPP1,TYMP                                                                                                                                                                    |
| 782385     | aspirin triggered resolvin D biosynthesis   | 5.91E-02 | 2.69E-01 | 1.00E+00 | 1.00E+00   | 1          | PTGS2                                                                                                                                                                        |
| 142281     | UMP biosynthesis                            | 5.91E-02 | 2.69E-01 | 1.00E+00 | 1.00E+00   | 1          | CAD                                                                                                                                                                          |
| 545275     | chondroitin biosynthesis                    | 5.91E-02 | 2.69E-01 | 1.00E+00 | 1.00E+00   | 1          | DIO2                                                                                                                                                                         |
| 545371     | MAP kinase cascade                          | 5.91E-02 | 2.69E-01 | 1.00E+00 | 1.00E+00   | 1          | CSGALNACT2                                                                                                                                                                   |
| 545355     | thyronamine and iodothyronamine metabolism  | 5.91E-02 | 2.69E-01 | 1.00E+00 | 1.00E+00   | 1          | EPHB2                                                                                                                                                                        |
| 1271888    | docosaehxaenoate biosynthesis III (mammals) | 8.72E-02 | 3.25E-01 | 1.00E+00 | 1.00E+00   | 1          | FADS2                                                                                                                                                                        |
| 782399     | UTP and CTP dephosphorylation II            | 1.15E-01 | 3.36E-01 | 1.00E+00 | 1.00E+00   | 1          | ENTPD1                                                                                                                                                                       |
| 142426     | urea cycle                                  | 1.15E-01 | 3.36E-01 | 1.00E+00 | 1.00E+00   | 1          | CPS1                                                                                                                                                                         |
| 142304     | UDP-N-acetyl-D-glucosamine biosynthesis II  | 1.41E-01 | 3.62E-01 | 1.00E+00 | 1.00E+00   | 1          | GFPT2                                                                                                                                                                        |
| KEGG       |                                             |          |          |          |            |            |                                                                                                                                                                              |
| 83068      | ECM-receptor interaction                    | 2.10E-09 | 5.14E-07 | 3.12E-06 | 5.14E-07   | 16         | COL1A1,COL1A2,COL4A1,COL4A2,COL6A3,ITGA11,FN1,COMP,TNC,SPP1,ITGA5,ITGB8,LAMA5,THBS1,THBS2,THBS4                                                                              |
| 172847     | Protein digestion and absorption            | 8.70E-09 | 1.06E-06 | 6.45E-06 | 2.12E-06   | 16         | COL1A1,COL1A2,COL3A1,COL4A1,COL4A2,COL5A1,COL5A2,COL6A3,COL7A1,COL10A1,COL11A1,COL12A1,COL15A1,COL5A3,COL18A1,ELN                                                            |
| 692234     | PI3K-Akt signaling pathway                  | 1.33E-07 | 1.08E-05 | 6.57E-05 | 3.24E-05   | 30         | PIK3AP1,PDGFRB,F2R,PGF,COL1A1,COL1A2,COL4A1,COL4A2,COL6A3,ITGA11,ANGPT2,FN1,COMP,TNC,CSF3R,IL2RA,IL6,MYB,SPP1,ITGA5,ITGB8,LAMA5,CCND2,OSM,THBS1,THBS2,THBS4,GNB4,OSMR,PIK3R5 |
| 83067      | Focal adhesion                              | 5.47E-07 | 3.34E-05 | 2.03E-04 | 1.33E-04   | 21         | PDGFRB,ACTN1,PGF,COL1A1,COL1A2,COL4A1,COL4A2,COL6A3,ITGA11,FN1,COMP,TNC,SPP1,ITGA5,PARVG,ITGB8,LAMA5,CCND2,THBS1,THBS2,THBS4                                                 |
| 153910     | Phagosome                                   | 3.59E-06 | 1.75E-04 | 1.07E-03 | 8.77E-04   | 17         | CLEC7A,TUBB3,FCGR1A,FCGR2A,FCGR3A,FCGR3B,COMP,MSR1,NCF2,ITGA5,MRC2,C1R,C3,OLR1,THBS1,THBS2,THBS4                                                                             |
| 83051      | Cytokine-cytokine receptor interaction      | 3.21E-03 | 5.22E-02 | 3.17E-01 | 7.83E-01   | 17         | PDGFRB,CXCL9,CCL3,CCR1,CCL18,CXCL6,CSF3R,IL2RA,IL6,IL11,INHBA,CXCL1,TNFRSF11B,LIF,OSM,REL,T,OSMR                                                                             |
| 83069      | Cell adhesion molecules (CAMs)              | 4.24E-03 | 6.47E-02 | 3.93E-01 | 1.00E+00   | 11         | SELE,SELL,ICAM1,CLDN4,CLDN3,CLDN7,VCAN,ITGB8,CLDN2,CLDN1,CDH3                                                                                                                |
| 852705     | MicroRNAs in cancer                         | 8.74E-03 | 9.70E-02 | 5.89E-01 | 1.00E+00   | 17         | PDGFRB,SERPIN5,PLAU,MMP9,MMP16,KIF23,TNC,FSCN1,CDCA5,ITGA5,PTG                                                                                                               |

|                                     |                                                                                 |          |          |          |          |    |                                                                                                                                                                                                                                                                                                                                                                                               |
|-------------------------------------|---------------------------------------------------------------------------------|----------|----------|----------|----------|----|-----------------------------------------------------------------------------------------------------------------------------------------------------------------------------------------------------------------------------------------------------------------------------------------------------------------------------------------------------------------------------------------------|
| 83105                               | Pathways in cancer                                                              | 2.90E-02 | 2.62E-01 | 1.00E+00 | 1.00E+00 | 19 | S2,NOTCH1,NOTCH3,E2F3,CCND2,THBS1,CDC25B,PDGFRB,F2R,PGF,ADCY3,MMP1,MMP9,COL4A1,COL4A2,FN1,WNT2,CSF3R,IL6,PTGS2,GLI2,LAMA5,E2F3,EDNRA,GNB4,LEF1                                                                                                                                                                                                                                                |
| 132956                              | Metabolic pathways                                                              | 9.96E-01 | 1.00E+00 | 1.00E+00 | 1.00E+00 | 24 | LPCAT1,DGKH,CSGALNACT2,LIPG,UPP1,ALDH1A3,MTHFD1L,HKDC1,ST3GAL2,CPS1,CYP2B6,IDO1,BCAT1,P4HA3,PTGS2,GGT5,SPHK1,GFPT2,NNMT,SDS,PLA2G7,CAD,LAMA5,TYMP                                                                                                                                                                                                                                             |
| <b>Pathway Interaction Database</b> |                                                                                 |          |          |          |          |    |                                                                                                                                                                                                                                                                                                                                                                                               |
| 138064                              | Syndecan-4-mediated signaling events                                            | 2.89E-05 | 2.01E-03 | 1.06E-02 | 3.18E-03 | 7  | ACTN1,MMP9,FN1,TNC,ITGA5,ADAM12,THBS1                                                                                                                                                                                                                                                                                                                                                         |
| 138007                              | PLK1 signaling events                                                           | 4.15E-05 | 2.01E-03 | 1.06E-02 | 4.56E-03 | 8  | PLK1,TPX2,CLSPN,BUB1,BUB1B,ECT2,KIF20A,CDC25B                                                                                                                                                                                                                                                                                                                                                 |
| 169349                              | Validated transcriptional targets of AP1 family members Fra1 and Fra2           | 5.48E-05 | 2.01E-03 | 1.06E-02 | 6.02E-03 | 7  | MGP,PLAU,MMP1,MMP9,COL1A2,IL6,LIF                                                                                                                                                                                                                                                                                                                                                             |
| 137945                              | amb2 Integrin signaling                                                         | 5.23E-04 | 1.44E-02 | 7.59E-02 | 5.75E-02 | 7  | PLAU,FGR,MMP9,FN1,ICAM1,IL6,THY1                                                                                                                                                                                                                                                                                                                                                              |
| 137935                              | FOXM1 transcription factor network                                              | 4.65E-03 | 7.31E-02 | 3.86E-01 | 5.12E-01 | 5  | CENPF,PLK1,FOXM1,NEK2,CDC25B                                                                                                                                                                                                                                                                                                                                                                  |
| 138080                              | Aurora B signaling                                                              | 5.85E-03 | 8.05E-02 | 4.25E-01 | 6.44E-01 | 5  | KIF23,BUB1,KIF2C,NCAPH,KIF20A                                                                                                                                                                                                                                                                                                                                                                 |
| 137934                              | E2F transcription factor network                                                | 2.20E-02 | 1.73E-01 | 9.11E-01 | 1.00E+00 | 6  | PLAU,MYBL2,E2F3,ORC1,SERPINE1,CDC6                                                                                                                                                                                                                                                                                                                                                            |
| 169345                              | Notch signaling pathway                                                         | 2.95E-02 | 1.91E-01 | 1.00E+00 | 1.00E+00 | 5  | MFAP2,DNM1,NOTCH1,NOTCH3,ADAM12                                                                                                                                                                                                                                                                                                                                                               |
| 137939                              | Direct p53 effectors                                                            | 4.49E-02 | 2.47E-01 | 1.00E+00 | 1.00E+00 | 8  | SERPINE5,GDF15,VCAN,SP1,BCL2A1,LIF,COL18A1,SERPINE1                                                                                                                                                                                                                                                                                                                                           |
| 169352                              | Regulation of Wnt-mediated beta catenin signaling and target gene transcription | 8.81E-02 | 3.59E-01 | 1.00E+00 | 1.00E+00 | 5  | MMP9,VCAN,SALL4,CCND2,LEF1                                                                                                                                                                                                                                                                                                                                                                    |
| <b>REACTOME</b>                     |                                                                                 |          |          |          |          |    |                                                                                                                                                                                                                                                                                                                                                                                               |
| 1270244                             | Extracellular matrix organization                                               | 4.22E-34 | 3.02E-31 | 2.16E-30 | 3.02E-31 | 61 | ACTN1,MFAP2,FBN1,ACAN,MMP1,MMP3,MMP7,MMP9,MMP11,MMP14,MMP16,COL1A1,COL1A2,COL3A1,COL4A1,COL4A2,COL5A1,COL5A2,NID2,COL6A3,COL7A1,COL8A1,ITGA11,COL10A1,COL11A1,COL12A1,COL15A1,COL16A1,FN1,COMP,ADAMTS4,ADAMTS2,TNC,ICAM1,COL5A3,VCAN,ADAMTS14,CTSB,CTSK,SPARC,HTRA1,SPP1,ASPN,P4HA3,ITGA5,ITGAX,ITGB8,BGN,BMP1,ADAMTS9,LAMA5,SERPINE1,COL18A1,THBS1,TIMP1,LOXL2,SERPINE1,LTBP2,ELN,LUM,PCOLCE |
| 1269340                             | Hemostasis                                                                      | 1.37E-06 | 7.60E-05 | 5.44E-04 | 9.78E-04 | 42 | PDE3A,CD109,DGKH,ACTN1,F2R,F2RL2,SERPINE2,FICER1G,PLAU,MMP1,FGR,PLEK,SELE,SELL,KIF23,ANGPT2,FN1,PDPN,KIF18B,IL2RA,MYB,DOCK4,KIF21B,SPARC,KIF4A,ISLR,ITGA5,ITGAX,LRP8,CD84,KIF2C,                                                                                                                                                                                                              |

|         |                                     |          |          |          |          |    |                                                                                                                                                                                                                                                                                                          |
|---------|-------------------------------------|----------|----------|----------|----------|----|----------------------------------------------------------------------------------------------------------------------------------------------------------------------------------------------------------------------------------------------------------------------------------------------------------|
|         |                                     |          |          |          |          |    | KIF26B,LCP2,OLR1,KIF20A,THBS1,P2RX7,TIMP1,SERPINE1,TREM1,GNB4,PIK3R5                                                                                                                                                                                                                                     |
| 1457780 | Neutrophil degranulation            | 8.68E-04 | 2.04E-02 | 1.46E-01 | 6.20E-01 | 28 | LPCAT1,ABCA13,CLEC5A,TRPM2,CHI3L1,FCER1G,FCGR2A,FCGR3B,PLAU,FGR,MMP9,SELL,FPR1,KCNAB2,SLC2A3,SLC11A1,CTSB,ITGAX,C3,ATP11A,C5AR1,LILRB3,RAB31,NFAM1,CXCL1,OLR1,TNFAIP6,PADI2                                                                                                                              |
| 1269741 | Cell Cycle                          | 2.11E-03 | 4.09E-02 | 2.93E-01 | 1.00E+00 | 32 | CENPF,HJURP,MCM2,MCMT7,MCM10,PLK1,FOXM1,KIF23,GINS4,TPX2,CLSPN,ESPL1,CDCA5,MYBL2,KNOTC1,RCC2,NEK2,BUB1,BUB1B,KIF2C,UBE2C,E2F3,NCAPH,CCND2,PKMYT1,KIF20A,ORC1,EXO1,CDC6,CD25B,AJUBA,TOP2A                                                                                                                 |
| 1269318 | Signaling by Interleukins           | 5.16E-03 | 7.38E-02 | 5.28E-01 | 1.00E+00 | 27 | PDGFRB,NOD1,CCL3,CCR1,MMP1,MMP3,MMP9,COL1A2,FN1,FPR1,ICAM1,CSF3R,FSCN1,IL2RA,IL6,IL11,ITGAX,PTGS2,LAMA5,GRIN2D,CXCL1,HAVCR2,LIF,OSM,TIMP1,DUSP10,OSMR                                                                                                                                                    |
| 1269310 | Cytokine Signaling in Immune system | 2.14E-02 | 2.12E-01 | 1.00E+00 | 1.00E+00 | 33 | PDGFRB,TRIM29,NOD1,FCGR1A,IFITM3,CCL3,CCR1,MMP1,MMP3,MMP9,COL1A2,FN1,FPR1,ICAM1,IFITM1,CSF3R,FSCN1,IL2RA,IL6,IL11,ITGAX,PTGS2,GBP5,LAMA5,GRIN2D,CXCL1,TNFRSF11B,HAVCR2,LIF,OSM,TIMP1,DUSP10,OSMR                                                                                                         |
| 1270303 | Axon guidance                       | 4.48E-02 | 3.48E-01 | 1.00E+00 | 1.00E+00 | 24 | EPHB2,TRIO,PDGFRB,PDLIM7,MMP9,PLXNA1,COL4A1,COL4A2,COL6A3,FN1,IL2RA,MYH10,KIF4A,ITGA5,DNM1,DPYSL3,ARHGAP39,GRIN2D,PLXNC1,TREM2,RBO2,DUSP10,EPHA3,EPHB1                                                                                                                                                   |
| 1269507 | Signaling by Rho GTPases            | 5.90E-02 | 3.80E-01 | 1.00E+00 | 1.00E+00 | 19 | TRIO,CENPF,CHN1,PLK1,IQGAP3,PLEKHG2,LOC100288637,KNTC1,MYH10,NCF2,ARHGAP11A,RCC2,BUB1,BUB1B,KIF14,KIF2C,ARHGAP39,ECT2,FMNL3                                                                                                                                                                              |
| 1269203 | Innate Immune System                | 6.10E-02 | 3.85E-01 | 1.00E+00 | 1.00E+00 | 49 | PIK3AP1,LPCAT1,PDGFRB,ABCA13,CLEC5A,TRPM2,CLEC7A,CHI3L1,ADCY3,NOD1,FCER1G,FCGR1A,FCGR2A,FCGR3A,FCGR3B,PLAU,FGR,MMP9,SELL,FN1,FPR1,KCNAB2,SLC2A3,SLC11A1,PRKDC,CTSB,IL2RA,CTSK,NCF2,ITGAX,C1R,C3,ATP11A,C5AR1,DNMI,LILRB3,RAB31,MUC16,GRIN2D,LCP2,NFAM1,CXCL1,OLR1,P2RX7,TREM2,TREM1,DUSP10,TNFAIP6,PADI2 |
| 1269576 | G alpha (i) signalling events       | 6.22E-02 | 3.87E-01 | 1.00E+00 | 1.00E+00 | 12 | ADCY3,AGT,CXCL9,CCR1,CXCL6,FPR1,APLN,C3,C5AR1,CXCL1,RGS1,GNB4                                                                                                                                                                                                                                            |

| Gen MAPP                  |                                                                                                               |          |          |          |          |     |                                                                                                                                                                                                                                                                                                                                                                                                                                                                                                                                                                                                                                                                                                                                                                                                                         |
|---------------------------|---------------------------------------------------------------------------------------------------------------|----------|----------|----------|----------|-----|-------------------------------------------------------------------------------------------------------------------------------------------------------------------------------------------------------------------------------------------------------------------------------------------------------------------------------------------------------------------------------------------------------------------------------------------------------------------------------------------------------------------------------------------------------------------------------------------------------------------------------------------------------------------------------------------------------------------------------------------------------------------------------------------------------------------------|
| MAP00251                  | MAP00251                                                                                                      | 1.20E-01 | 6.40E-01 | 1.00E+00 | 1.00E+00 | 2   | CPS1,CAD                                                                                                                                                                                                                                                                                                                                                                                                                                                                                                                                                                                                                                                                                                                                                                                                                |
| MAP00240                  | MAP00240                                                                                                      | 1.44E-01 | 6.40E-01 | 1.00E+00 | 1.00E+00 | 3   | IGFBP7,CAD,TYMP                                                                                                                                                                                                                                                                                                                                                                                                                                                                                                                                                                                                                                                                                                                                                                                                         |
| MAP00272                  | MAP00272                                                                                                      | 2.40E-01 | 6.40E-01 | 1.00E+00 | 1.00E+00 | 1   | SDS                                                                                                                                                                                                                                                                                                                                                                                                                                                                                                                                                                                                                                                                                                                                                                                                                     |
| MAP00360                  | MAP00360                                                                                                      | 3.86E-01 | 6.40E-01 | 1.00E+00 | 1.00E+00 | 1   | ALDH1A3                                                                                                                                                                                                                                                                                                                                                                                                                                                                                                                                                                                                                                                                                                                                                                                                                 |
| MAP00380                  | MAP00380                                                                                                      | 4.03E-01 | 6.40E-01 | 1.00E+00 | 1.00E+00 | 2   | CYP2B6,IDO1                                                                                                                                                                                                                                                                                                                                                                                                                                                                                                                                                                                                                                                                                                                                                                                                             |
| MAP00590                  | MAP00590                                                                                                      | 4.39E-01 | 6.40E-01 | 1.00E+00 | 1.00E+00 | 1   | PTGS2                                                                                                                                                                                                                                                                                                                                                                                                                                                                                                                                                                                                                                                                                                                                                                                                                   |
| MAP00230                  | MAP00230                                                                                                      | 4.63E-01 | 6.40E-01 | 1.00E+00 | 1.00E+00 | 3   | ADCY3,IGFBP7,TYMP                                                                                                                                                                                                                                                                                                                                                                                                                                                                                                                                                                                                                                                                                                                                                                                                       |
| MAP00010                  | MAP00010                                                                                                      | 4.65E-01 | 6.40E-01 | 1.00E+00 | 1.00E+00 | 2   | ALDH1A3,FMNL3                                                                                                                                                                                                                                                                                                                                                                                                                                                                                                                                                                                                                                                                                                                                                                                                           |
| MAP00330                  | MAP00330                                                                                                      | 6.86E-01 | 7.20E-01 | 1.00E+00 | 1.00E+00 | 1   | CPS1                                                                                                                                                                                                                                                                                                                                                                                                                                                                                                                                                                                                                                                                                                                                                                                                                    |
| MAP00071                  | MAP00071                                                                                                      | 7.54E-01 | 7.54E-01 | 1.00E+00 | 1.00E+00 | 1   | CYP2B6                                                                                                                                                                                                                                                                                                                                                                                                                                                                                                                                                                                                                                                                                                                                                                                                                  |
| MSigDB C2 BIOCARTA (v6.0) |                                                                                                               |          |          |          |          |     |                                                                                                                                                                                                                                                                                                                                                                                                                                                                                                                                                                                                                                                                                                                                                                                                                         |
| M5889                     | Ensemble of genes encoding extracellular matrix and extracellular matrix-associated proteins                  | 2.21E-42 | 2.34E-40 | 1.23E-39 | 2.34E-40 | 121 | FSTL3,CLEC5A,CD109,EMI LIN2,CLEC7A,PGF,MFAP2, SERPINB5,SERPINE2,SERP INB9,FBN1,MGP,AEBP1,A CAN,SPON2,AGT,CXCL9,C THRC1,CCL3,PLAU,MMP1, BMP8A,C1QTNF6,MMP3,C CL18,MMP7,MMP9,MMP11 ,MMP14,CXCL6,MMP16,PL XNA1,COL1A1,COL1A2,CO L3A1,COL4A1,COL4A2,SE MA6B,COL5A1,COL5A2,NI D2,COL6A3,COL7A1,COL8 A1,COL10A1,COL11A1,MX RA5,COL12A1,SFRP2,SFRP 4,COL15A1,COL16A1,CHR DL2,ANGPT2,FN1,COMP,A DAMTS4,ADAMTS2,TNC,G DF15,WNT2,ANXA13,COL5 A3,IGFBP7,VCAN,CST1,HA PLN3,ADAMTS14,CTSB,CT SK,IL6,IL11,SPARC,HTRA1 ,SPOCK1,INHBA,SPP1,ASP N,P4HA3,BGN,BMP1, FNDC 1,SRPX2,SULF2,PXDN,AD AMTS9,SULF1,CRISPLD1,P LXDC1,LAMA5,MUC16,ES M1,HTRA3,OMD,ADAM12, SERPINH1,CXCL1,ADAMT S12,TGFBI,LIF,COL18A1,T GM2,OSM,THBS1,THBS2,T HBS4,ANGPTL2,FSTL1,HM CN1,PLXDC2,LGI2,TIMP1, PLXNC1,LOXL2,SERPINE1, LTBP2,ELN,GREM1,TNFAI P6,LUM,PCOLCE |
| M5884                     | Ensemble of genes encoding core extracellular matrix including ECM glycoproteins, collagens and proteoglycans | 3.53E-31 | 1.87E-29 | 9.81E-29 | 3.74E-29 | 56  | EMILIN2,MFAP2,FBN1,MG P,AEBP1,ACAN,SPON2,CT HRC1,COL1A1,COL1A2,CO L3A1,COL4A1,COL4A2,CO L5A1,COL5A2,NID2,COL6 A3,COL7A1,COL8A1,COL1 0A1,COL11A1,MXRA5,COL 12A1,COL15A1,COL16A1,F N1,COMP,TNC,COL5A3,IG FBP7,VCAN,HAPLN3,SPAR C,SPOCK1,SPP1,ASP,N,BGN ,FNDC 1,SRPX2,PXDN,CRIS PLD1,LAMA5,ESM1,OMD, TGFBI,COL18A1,THBS1,TH BS2,THBS4,HMCN1,LGI2,L TBP2,ELN,TNFAIP6,LUM,P COLCE                                                                                                                                                                                                                                                                                                                                                                                                                                            |
| M5885                     | Ensemble of genes encoding ECM-associated proteins including ECM-affiliated proteins,                         | 5.14E-15 | 1.36E-13 | 7.15E-13 | 5.45E-13 | 65  | FSTL3,CLEC5A,CD109,CLE C7A,PGF,SERPINB5,SERP I NE2,SERPINB9,AGT,CXCL 9,CCL3,PLAU,MMP1,BMP8 A,C1QTNF6,MMP3,CCL18,                                                                                                                                                                                                                                                                                                                                                                                                                                                                                                                                                                                                                                                                                                        |

|                   |                                                                                                    |          |          |          |          |    |                                                                                                                                                                                                                                                                                                             |
|-------------------|----------------------------------------------------------------------------------------------------|----------|----------|----------|----------|----|-------------------------------------------------------------------------------------------------------------------------------------------------------------------------------------------------------------------------------------------------------------------------------------------------------------|
|                   | ECM regulators and secreted factors                                                                |          |          |          |          |    | MMP7,MMP9,MMP11,MMP14,CXCL6,MMP16,PLXNA1,SEMA6B,SFRP2,SFRP4,CHRD,ANGPT2,ADAMTS4,ADAMTS2,GDF15,WNT2,ANXA13,CST1,ADAMTS14,CTSB,CTSK,IL6,IL11,HTRA1,INHBA,P4HA3,BMP1,SULF2,ADAMTS9,SULF1,PLXDC1,MUC16,HTRA3,ADAM12,SERPINH1,CXCL1,ADAMTS12,LIF,TGM2,OSM,ANGPTL2,FSTL1,PLXDC2,TIMP1,PLXNC1,LOXL2,SERPINE1,GREM1 |
| M3008             | Genes encoding structural ECM glycoproteins                                                        | 1.44E-13 | 2.66E-12 | 1.40E-11 | 1.53E-11 | 30 | EMILIN2,MFAP2,FBN1,MGP,AEBP1,SPON2,CTHRC1,NID2,MXRA5,FN1,COMP,TNCC,IGFBP7,SPARC,SPP1,FNDC1,SRPX2,PXDN,CRISPLD1,LAMA5,TGFB1,THBS1,THBS2,THBS4,HMCN1,LGI2,LTBP2,ELN,TNFAIP6,PCOLCE                                                                                                                            |
| M3468             | Genes encoding enzymes and their regulators involved in the remodeling of the extracellular matrix | 1.51E-13 | 2.66E-12 | 1.40E-11 | 1.60E-11 | 33 | CD109,SERPINB5,SERPINE2,SERPINB9,AGT,PLAU,MMP1,MMP3,MMP7,MMP9,MMP11,MMP14,MMP16,ADAMTS4,ADAMTS2,CST1,ADAMTS14,CTSB,CTSK,HTRA1,P4HA3,BMP1,SULF2,ADAMTS9,SULF1,HTRA3,ADAM12,SERPINH1,ADAMTS12,TGM2,TIMP1,LOXL2,SERPINE1                                                                                       |
| M5882             | Genes encoding proteoglycans                                                                       | 6.26E-07 | 9.47E-06 | 4.97E-05 | 6.63E-05 | 9  | ACAN,VCAN,HAPLN3,SPOCK1,ASPN,BGN,ESM1,OMD,LUM                                                                                                                                                                                                                                                               |
| M5887             | Genes encoding structural components of basement membranes                                         | 2.00E-05 | 2.65E-04 | 1.39E-03 | 2.12E-03 | 8  | COL4A1,COL4A2,NID2,COL6A3,COL15A1,LAMA5,COL18A1,HMCN1                                                                                                                                                                                                                                                       |
| M5883             | Genes encoding secreted soluble factors                                                            | 1.63E-03 | 1.68E-02 | 8.79E-02 | 1.72E-01 | 21 | FSTL3,PGF,CXCL9,CCL3,BMP8A,CCL18,CXCL6,SFRP2,SFRP4,CHRD,ANGPT2,GDF15,WNT2,IL6,IL11,INHBA,CXCL1,LIF,OSM,ANGPTL2,FSTL1                                                                                                                                                                                        |
| M5880             | Genes encoding proteins affiliated structurally or functionally to extracellular matrix proteins   | 1.40E-02 | 8.22E-02 | 4.31E-01 | 1.00E+00 | 11 | CLEC5A,CLEC7A,C1QTNF6,PLXNA1,SEMA6B,ANXA13,PLXDC1,MUC16,PLXDC2,PLXNC1,GREM1                                                                                                                                                                                                                                 |
| M3270             | Integrin Signaling Pathway                                                                         | 9.94E-02 | 3.40E-01 | 1.00E+00 | 1.00E+00 | 5  | EPHB2,ACTN1,ITGA11,ITGA5,ANGPTL2                                                                                                                                                                                                                                                                            |
| <b>Panther DB</b> |                                                                                                    |          |          |          |          |    |                                                                                                                                                                                                                                                                                                             |
| P00034            | Integrin signalling pathway                                                                        | 1.64E-10 | 1.28E-08 | 6.33E-08 | 1.28E-08 | 24 | ACTN1,ITGBL1,COL1A1,COL1A2,COL3A1,COL4A1,COL4A2,COL5A1,COL5A2,COL6A3,COL7A1,COL8A1,ITGA11,COL10A1,COL11A1,COL12A1,COL15A1,COL16A1,FN1,COL5A3,ITGA5,ITGAX,ITGB8,LAMA5                                                                                                                                        |
| P00050            | Plasminogen activating cascade                                                                     | 1.08E-04 | 4.21E-03 | 2.08E-02 | 8.42E-03 | 5  | PLAU,MMP1,MMP3,MMP9,SERPINE1                                                                                                                                                                                                                                                                                |
| P00004            | Alzheimer disease-presenilin pathway                                                               | 2.07E-03 | 5.39E-02 | 2.66E-01 | 1.62E-01 | 10 | MMP1,MMP7,MMP9,MMP14,MMP16,WNT2,NOTCH1,NOTCH3,LEF1,CDH3                                                                                                                                                                                                                                                     |



|                         |                                                            |          |          |          |          |    |                                                                    |
|-------------------------|------------------------------------------------------------|----------|----------|----------|----------|----|--------------------------------------------------------------------|
| P02749                  | Leucine biosynthesis                                       | 5.91E-02 | 5.76E-01 | 1.00E+00 | 1.00E+00 | 1  | BCAT1                                                              |
| P00045                  | Notch signaling pathway                                    | 9.82E-02 | 6.83E-01 | 1.00E+00 | 1.00E+00 | 3  | NOTCH1,NOTCH3,HEYL                                                 |
| P00011                  | Blood coagulation                                          | 1.17E-01 | 6.83E-01 | 1.00E+00 | 1.00E+00 | 3  | F2R,PLAU,SERPINE1                                                  |
| P00039                  | Metabotropic glutamate receptor group III pathway          | 1.25E-01 | 6.83E-01 | 1.00E+00 | 1.00E+00 | 4  | SLC1A3,CACNA1E,GRIN2D,GNB4                                         |
| P00019                  | Endothelinsignaling pathway                                | 1.75E-01 | 6.83E-01 | 1.00E+00 | 1.00E+00 | 4  | ADCY3,PTGS2,EDNRA,PIK3R5                                           |
| P00012                  | Cadherin signaling pathway                                 | 2.00E-01 | 6.98E-01 | 1.00E+00 | 1.00E+00 | 7  | WNT2,CELSR3,LEF1,CDH3,CDH11,CDH13,CDH17                            |
| P00057                  | Wntsignaling pathway                                       | 2.05E-01 | 6.98E-01 | 1.00E+00 | 1.00E+00 | 12 | MMP7,SFRP2,SFRP4,WNT2,DKK2,CELSR3,GNB4,LEF1,CDH3,CDH11,CDH13,CDH17 |
| <b>Pathway Ontology</b> |                                                            |          |          |          |          |    |                                                                    |
| PW:0000286              | integrin signaling                                         | 5.23E-03 | 1.57E-01 | 7.34E-01 | 3.14E-01 | 5  | ITGA11,ITGA5,PARVG,ITGAX,ITGB8                                     |
| PW:0000484              | altered lipoprotein metabolic                              | 1.70E-02 | 1.69E-01 | 7.89E-01 | 1.00E+00 | 2  | APOC1,APOE                                                         |
| PW:0000165              | taurine and hypotaurine metabolic                          | 1.70E-02 | 1.69E-01 | 7.89E-01 | 1.00E+00 | 2  | GGT5,SDS                                                           |
| PW:0000419              | water transport                                            | 2.80E-02 | 1.69E-01 | 7.89E-01 | 1.00E+00 | 2  | AQP1,AQP9                                                          |
| PW:0000300              | renal disease, renal disorder                              | 3.09E-02 | 1.69E-01 | 7.89E-01 | 1.00E+00 | 1  | SPP1                                                               |
| PW:0000544              | altered reverse cholesterol transport                      | 3.09E-02 | 1.69E-01 | 7.89E-01 | 1.00E+00 | 1  | ABCA1                                                              |
| PW:0000516              | Interleukin-6 signaling                                    | 3.09E-02 | 1.69E-01 | 7.89E-01 | 1.00E+00 | 1  | IL6                                                                |
| PW:0000244              | Angiotensin II signaling                                   | 3.44E-02 | 1.72E-01 | 8.04E-01 | 1.00E+00 | 2  | AGT,OLR1                                                           |
| PW:0000459              | apelin signaling                                           | 8.72E-02 | 2.08E-01 | 9.75E-01 | 1.00E+00 | 1  | APLN                                                               |
| PW:0000078              | cyanamino acid metabolic                                   | 8.72E-02 | 2.08E-01 | 9.75E-01 | 1.00E+00 | 1  | GGT5                                                               |
| <b>SMPDB</b>            |                                                            |          |          |          |          |    |                                                                    |
| SMP00009                | Ammonia Recycling                                          | 2.22E-02 | 3.04E-01 | 1.00E+00 | 1.00E+00 | 2  | CPS1,SDS                                                           |
| SMP00202                | MNGIE (Mitochondrial Neurogastrointestinal Encephalopathy) | 3.09E-02 | 3.04E-01 | 1.00E+00 | 1.00E+00 | 1  | TYMP                                                               |
| SMP00018                | Alpha Linolenic Acid and Linoleic Acid Metabolism          | 5.91E-02 | 3.04E-01 | 1.00E+00 | 1.00E+00 | 1  | FADS2                                                              |
| SMP00147                | Cilazapril Pathway                                         | 8.07E-02 | 3.04E-01 | 1.00E+00 | 1.00E+00 | 3  | AGT,CALD1,EDNRA                                                    |
| SMP00083                | Acetylsalicylic Acid Pathway                               | 9.06E-02 | 3.04E-01 | 1.00E+00 | 1.00E+00 | 2  | F2R,PTGS2                                                          |
| SMP00379                | Nifedipine Pathway                                         | 1.00E-01 | 3.04E-01 | 1.00E+00 | 1.00E+00 | 2  | CALD1,EDNRA                                                        |
| SMP00087                | Rofecoxib Pathway                                          | 1.20E-01 | 3.08E-01 | 1.00E+00 | 1.00E+00 | 2  | F2R,PTGS2                                                          |
| SMP00053                | One Carbon Pool By Folate                                  | 2.62E-01 | 3.47E-01 | 1.00E+00 | 1.00E+00 | 1  | MTHFD1L                                                            |
| SMP00048                | Nicotinate and Nicotinamide Metabolism                     | 3.06E-01 | 3.47E-01 | 1.00E+00 | 1.00E+00 | 1  | NNMT                                                               |
| SMP00006                | Tyrosine Metabolism                                        | 5.18E-01 | 5.31E-01 | 1.00E+00 | 1.00E+00 | 1  | NOX4                                                               |

**Table 4** The enriched pathway terms of the down regulated differentially expressed genes

| <b>BIOCYC</b> |                               |          |          |          |            |            |                       |
|---------------|-------------------------------|----------|----------|----------|------------|------------|-----------------------|
| Pathway ID    | Pathway Name                  | P-value  | FDR B&H  | FDR B&Y  | Bonferroni | Gene Count | Gene                  |
| 1108771       | allopregnanolone biosynthesis | 3.09E-04 | 1.58E-02 | 7.63E-02 | 2.16E-02   | 3          | AKR1C3,AKR1C1,AKR1C2  |
| 782382        | gluconeogenesis               | 4.51E-04 | 1.58E-02 | 7.63E-02 | 3.16E-02   | 4          | FBP1,ALDOB,ALDOC,FBP2 |

|             |                                                    |          |          |          |          |    |                                                                                                                                                                                                                                                                                                                                                                                                 |
|-------------|----------------------------------------------------|----------|----------|----------|----------|----|-------------------------------------------------------------------------------------------------------------------------------------------------------------------------------------------------------------------------------------------------------------------------------------------------------------------------------------------------------------------------------------------------|
| 545351      | sphingosine and sphingosine-1-phosphate metabolism | 1.23E-03 | 2.86E-02 | 1.38E-01 | 8.58E-02 | 3  | ASAH2,PTGR1,ACER2                                                                                                                                                                                                                                                                                                                                                                               |
| 545319      | creatine-phosphate biosynthesis                    | 1.91E-03 | 3.25E-02 | 1.57E-01 | 1.34E-01 | 2  | CKM,CKMT2                                                                                                                                                                                                                                                                                                                                                                                       |
| 545359      | superpathway of melatonin degradation              | 2.32E-03 | 3.25E-02 | 1.57E-01 | 1.62E-01 | 3  | MAOA,CYP2S1,CYP2C19                                                                                                                                                                                                                                                                                                                                                                             |
| 545278      | heparansulfate biosynthesis                        | 3.42E-03 | 3.42E-02 | 1.65E-01 | 2.39E-01 | 4  | B3GAT1,HS6ST3,XYLT2,A4GNT                                                                                                                                                                                                                                                                                                                                                                       |
| 1108786     | mucin core 1 and core 2 O-glycosylation            | 3.42E-03 | 3.42E-02 | 1.65E-01 | 2.39E-01 | 4  | GCNT4,GCNT1,GALNT6,GALNT5                                                                                                                                                                                                                                                                                                                                                                       |
| 545347      | sucrose degradation                                | 9.06E-03 | 7.05E-02 | 3.41E-01 | 6.34E-01 | 2  | ALDOB,ALDOC                                                                                                                                                                                                                                                                                                                                                                                     |
| 545352      | acetone degradation I (to methylglyoxal)           | 1.64E-02 | 9.15E-02 | 4.42E-01 | 1.00E+00 | 2  | CYP2S1,AKR1B10                                                                                                                                                                                                                                                                                                                                                                                  |
| 1108788     | terminal O-glycans residues modification           | 1.64E-02 | 9.15E-02 | 4.42E-01 | 1.00E+00 | 2  | FUT9,GCNT2                                                                                                                                                                                                                                                                                                                                                                                      |
| <b>KEGG</b> |                                                    |          |          |          |          |    |                                                                                                                                                                                                                                                                                                                                                                                                 |
| 83032       | Drug metabolism - cytochrome P450                  | 1.80E-10 | 2.08E-08 | 1.24E-07 | 3.83E-08 | 15 | MAOA,ADH1C,ADH7,ALDH3A1,FMO5,UGT1A10,UGT1A6,CYP2C19,CYP2C8,CYP2C9,CYP3A4,CYP3A5,GSTA1,GSTA2,GSTA3                                                                                                                                                                                                                                                                                               |
| 673221      | Chemical carcinogenesis                            | 1.96E-10 | 2.08E-08 | 1.24E-07 | 4.17E-08 | 16 | ADH1C,ADH7,ALDH3A1,UGT1A10,UGT1A6,CYP2C19,CYP2C8,CYP2C9,CYP2C18,CYP3A4,CYP3A5,AKR1C2,SULT2A1,GSTA1,GSTA2,GSTA3                                                                                                                                                                                                                                                                                  |
| 83031       | Metabolism of xenobiotics by cytochrome P450       | 4.14E-10 | 2.94E-08 | 1.75E-07 | 8.82E-08 | 15 | CYP2S1,ADH1C,ADH7,ALDH3A1,UGT1A10,UGT1A6,AKR7A3,CYP2C9,CYP3A4,CYP3A5,AKR1C1,SULT2A1,GSTA1,GSTA2,GSTA3                                                                                                                                                                                                                                                                                           |
| 154409      | Gastric acid secretion                             | 4.53E-08 | 1.93E-06 | 1.15E-05 | 9.65E-06 | 13 | HRH2,SLC9A1,SLC26A7,ATP4A,ATP4B,SST,KCNJ15,KCNJ16,KCNQ1,CA2,KCNE2,CCKBR,SLC9A4                                                                                                                                                                                                                                                                                                                  |
| 132956      | Metabolic pathways                                 | 3.35E-07 | 1.19E-05 | 7.05E-05 | 7.12E-05 | 62 | CMBL,HGD,MAOA,ACADL,GGT6,B3GALT5,CYP2S1,TST,GCNT4,ME1,ADH1C,CKB,ADH7,CKM,CKMT2,FBP1,PIK3C2G,SMPD3,ALDH1A1,ALDH3A1,ALDOB,ALDOC,ALDH6A1,AMPD1,HYAL1,UGT1A10,ASAH2,UGT1A6,LIPF,FUT9,AKR1C3,B3GAT1,ACER2,ST6GALNAC1,CYP2C19,GALE,CYP2C8,CHIA,CYP2C9,CYP2C18,CYP3A4,CYP3A5,ACSM1,FBP2,GCNT1,GCNT2,ITPKA,BHMT,XYLT2,B3GNT6,DHCR24,AKR1B10,GLUL,B4GALNT3,GPT2,GPT,RDH12,RGN,DHRS9,TM7SF2,GALNT6,GALNT5 |
| 172847      | Protein digestion and absorption                   | 2.79E-06 | 8.49E-05 | 5.05E-04 | 5.94E-04 | 12 | COL6A5,PGA5,COL2A1,COL4A6,COL17A1,CPA2,SLC9A3,SLC15A1,KCNQ1,PGA3,PGA4,SLC7A8                                                                                                                                                                                                                                                                                                                    |
| 193146      | Bile secretion                                     | 4.27E-04 | 9.09E-03 | 5.40E-02 | 9.09E-02 | 8  | NR0B2,AQP4,SLC9A1,SLC9A3,SLC4A4,CYP3A                                                                                                                                                                                                                                                                                                                                                           |

|                                     |                                                  |          |          |          |          |    |                                                                                                                                                                                                                                                                               |
|-------------------------------------|--------------------------------------------------|----------|----------|----------|----------|----|-------------------------------------------------------------------------------------------------------------------------------------------------------------------------------------------------------------------------------------------------------------------------------|
| 814926                              | Carbon metabolism                                | 2.51E-03 | 2.43E-02 | 1.44E-01 | 5.34E-01 | 9  | 4,SULT2A1,CA2<br>ME1,FBP1,ALDOB,ALD<br>OC,ALDH6A1,FBP2,GP<br>T2,GPT,RGN                                                                                                                                                                                                       |
| 169306                              | Pancreatic secretion                             | 1.12E-02 | 9.95E-02 | 5.91E-01 | 1.00E+00 | 7  | CPA2,SLC9A1,SLC4A4,<br>KCNQ1,RAB27B,CA2,C<br>CKAR                                                                                                                                                                                                                             |
| 83053                               | Neuroactive ligand-receptor<br>interaction       | 9.90E-02 | 4.22E-01 | 1.00E+00 | 1.00E+00 | 11 | F2RL1,HRH2,HTR1E,PR<br>LR,GABRB3,SSTR1,PT<br>GER3,GRIA4,LEPR,CC<br>KAR,CCKBR                                                                                                                                                                                                  |
| <b>Pathway Interaction Database</b> |                                                  |          |          |          |          |    |                                                                                                                                                                                                                                                                               |
| 137911                              | FOXA2 and FOXA3<br>transcription factor networks | 8.12E-04 | 1.50E-02 | 6.31E-02 | 3.00E-02 | 6  | FOXA1,FOXA2,FOXA3,<br>TTR,ALDOB,APOA1                                                                                                                                                                                                                                         |
| 169356                              | RhoA signaling pathway                           | 8.59E-02 | 7.10E-01 | 1.00E+00 | 1.00E+00 | 3  | SH3GL2,SLC9A1,SLC9<br>A3                                                                                                                                                                                                                                                      |
| 138074                              | Visual signal transduction:<br>Rods              | 1.15E-01 | 7.10E-01 | 1.00E+00 | 1.00E+00 | 2  | GUCA1C,RDH12                                                                                                                                                                                                                                                                  |
| 138017                              | Signaling events mediated<br>by PTP1B            | 1.34E-01 | 7.10E-01 | 1.00E+00 | 1.00E+00 | 3  | PRLR,LEPR,CDH2                                                                                                                                                                                                                                                                |
| 169347                              | Notch-mediated HES/HEY<br>network                | 3.47E-01 | 9.31E-01 | 1.00E+00 | 1.00E+00 | 2  | ID1,GATA6                                                                                                                                                                                                                                                                     |
| 138027                              | Regulation of Androgen<br>receptor activity      | 3.65E-01 | 9.31E-01 | 1.00E+00 | 1.00E+00 | 2  | SPDEF,TMPRSS2                                                                                                                                                                                                                                                                 |
| 137944                              | IL1-mediated signaling<br>events                 | 5.95E-01 | 9.31E-01 | 1.00E+00 | 1.00E+00 | 1  | IL1R2                                                                                                                                                                                                                                                                         |
| 137948                              | BMP receptor signaling                           | 6.05E-01 | 9.31E-01 | 1.00E+00 | 1.00E+00 | 1  | SOSTDC1                                                                                                                                                                                                                                                                       |
| 138070                              | Regulation of RhoA activity                      | 6.95E-01 | 9.31E-01 | 1.00E+00 | 1.00E+00 | 1  | ARHGDI3                                                                                                                                                                                                                                                                       |
| 137999                              | Integrins in angiogenesis                        | 6.95E-01 | 9.31E-01 | 1.00E+00 | 1.00E+00 | 1  | ANGPTL3                                                                                                                                                                                                                                                                       |
| <b>REACTOME</b>                     |                                                  |          |          |          |          |    |                                                                                                                                                                                                                                                                               |
| 1270189                             | Biological oxidations                            | 8.27E-10 | 4.25E-07 | 2.90E-06 | 4.25E-07 | 25 | CMBL,AADAC,MAOA,<br>GGT6,CYP2S1,ADH1C,<br>ADH7,<br>ALDH1A1,ALDH3A1,U<br>GT1A6,AKR7A3,CYP4F<br>12,<br>CYP2C19,CYP2C8,CYP<br>2C9,CYP2C18,CYP3A4,<br>CYP3A5,<br>ACSM1,SULT1B1,SULT<br>1C2,SULT2A1,GSTA1,G<br>STA2, GSTA3                                                         |
| 1270190                             | Phase 1 - Functionalization<br>of compounds      | 1.32E-07 | 1.70E-05 | 1.16E-04 | 6.78E-05 | 15 | CMBL,AADAC,MAOA,<br>CYP2S1,ADH1C,ADH7,<br>ALDH1A1,<br>ALDH3A1,CYP4F12,CY<br>P2C19,CYP2C8,CYP2C9<br>,CYP2C18,CYP3A4,CYP<br>3A5                                                                                                                                                 |
| 1269903                             | Transmembrane transport of<br>small molecules    | 5.85E-04 | 1.59E-02 | 1.09E-01 | 3.01E-01 | 32 | ANO5,CLCNKA,SCNN1<br>B,SCNN1G,FXFD3,ATP<br>13A4,<br>SLC26A9,APOA1,AQP4,<br>SLC1A2,AQP5,SLC5A5,<br>SLC9A1,<br>SLC9A2,SLC9A3,SLC15<br>A1,SLC26A7,ANO7,SLC<br>4A4,<br>SLC2A12,ATP4A,ATP4<br>B,GABRB3,AZGP1,GC<br>KR,AQP10,<br>ATP13A5,SGK2,SLC7A<br>8,SLC9A4,SLC28A2,SL<br>C16A7 |
| 1270001                             | Metabolism of lipids and<br>lipoproteins         | 3.10E-03 | 4.99E-02 | 3.40E-01 | 1.00E+00 | 34 | ACADL,ME1,PIK3C2G,<br>LIPH,HPGD,SMPD3,EL<br>OVL6,<br>ASAH2,GDPD3,FA2H,L<br>IPF,APOA1,APOA4,AP<br>OC3,PTGR1,CIDEC,PR                                                                                                                                                           |

|                 |                                           |          |          |          |          |    |                                                                                                                                                                                                                                                                    |
|-----------------|-------------------------------------------|----------|----------|----------|----------|----|--------------------------------------------------------------------------------------------------------------------------------------------------------------------------------------------------------------------------------------------------------------------|
| 1269957         | Metabolism of carbohydrates               | 9.17E-03 | 9.25E-02 | 6.31E-01 | 1.00E+00 | 15 | KAA2,AKR1C3,ACER2,CYP2C19,CYP2C8,CYP2C9,INSIG1,AKR1C1,AKR1C2,BHMT,SULT2A1,DHCR24,ANGPTL3,SPTSSB,OXCT1,CD36,AKR1B15, TM7SF2                                                                                                                                         |
| 1270158         | Metabolism of amino acids and derivatives | 4.88E-02 | 2.53E-01 | 1.00E+00 | 1.00E+00 | 15 | FBP1,ALDH1A1,ALDOB,ALDOC,HYAL1,SLC9A1,B3GAT1,HS6ST3,GALE,CHIA,FBP2,GCKR,XYLT2,B3GNT7,HAS3HGD,TST,CKB,CKM,CKMT2,ALDH6A1,DUOX2,SLC5A5,GNMT,BHMT,DUOX1,GLUL,NQO1,GPT2,GPTTTR,PLAC8,S100P,ALDOCM,MTTL7A,SLPI,CYSTM1,PTPRN2,RAB27A,TCN1,ORM1,ORM2,CD36,LTFF, HBB, RAB37 |
| 1457780         | Neutrophil degranulation                  | 1.89E-01 | 4.97E-01 | 1.00E+00 | 1.00E+00 | 16 | F13A1,SERPINA4,FGA, FGB, FGG, APOA1, GATA5, SCG3, CXADR, KIF1A, GATA6, RAB27B, SLC7A8, ORM1, ORM2, CD36, CLEC3B, HBB, SERPINA5                                                                                                                                     |
| 1269340         | Hemostasis                                | 2.77E-01 | 6.05E-01 | 1.00E+00 | 1.00E+00 | 19 | KLF4,GCNT4,PGA5,TR,FGA,PAPPA2,ERO1B,SLC25A4,FOLR1,MYRIP,APOA1,APOA4,IGFALS,IGFBP2,MUC1,MUC6,ST6GALNAC1,LYPD6B,GHRL,GATA6,GCNT1,B3GNT6,LDHD,ODAM,ADAMTS15,RAB27A,RAB27B,PGA3,PGA4,ADAMTSL1,PSCA,MUC5B,B3GNT7,EEF1A2,B4GALNT2,A4GNT,CNTN3,LTF,GALNT6,GALNT5,RAB37    |
| 1268677         | Metabolism of proteins                    | 5.61E-01 | 8.87E-01 | 1.00E+00 | 1.00E+00 | 41 | ERBB4,COL6A5,KLF4,FOX2,FOX3,FGA, FGB, KRT20, FGG, SH3GL2, CSTA, SOX2, PRSS8, NRG4, NCAM1, RPS6KA6, UNC5D, RAPIGAP, DSC2, CD36, CDH2                                                                                                                                |
| 1270302         | Developmental Biology                     | 9.27E-01 | 1.00E+00 | 1.00E+00 | 1.00E+00 | 21 | ME1,FBP1,ALDOB,ALDOC,FBP2,GPTACADL,ADH1C,ADH7,ALDH1A1,CYP2C8,CYP2C9,CYP2C18,CYP3A4,CYP3A5ADH1C,ADH7,FBP1,ALDH1A1,ALDH3A1,ALDOB,ALDOC,FBP2GLUL,CA2,CA4,CA9CKB,CKM,CKMT2PIK3C2G,ITPKA                                                                                |
| <b>Gen MAPP</b> |                                           |          |          |          |          |    |                                                                                                                                                                                                                                                                    |
| MAP00710        | MAP00710                                  | 1.68E-06 | 3.19E-05 | 1.30E-04 | 5.54E-05 | 6  | ME1,FBP1,ALDOB,ALDOC,FBP2,GPT                                                                                                                                                                                                                                      |
| MAP00071        | MAP00071                                  | 1.93E-06 | 3.19E-05 | 1.30E-04 | 6.37E-05 | 9  | ACADL,ADH1C,ADH7,ALDH1A1,CYP2C8,CYP2C9,CYP2C18,CYP3A4,CYP3A5                                                                                                                                                                                                       |
| MAP00010        | MAP00010                                  | 4.59E-05 | 5.05E-04 | 2.06E-03 | 1.51E-03 | 8  | ADH1C,ADH7,FBP1,ALDH1A1,ALDH3A1,ALDOB,ALDOC,FBP2                                                                                                                                                                                                                   |
| MAP00910        | MAP00910                                  | 1.75E-03 | 7.23E-03 | 2.96E-02 | 5.78E-02 | 4  | GLUL,CA2,CA4,CA9                                                                                                                                                                                                                                                   |
| MAP00220        | MAP00220                                  | 8.53E-03 | 2.56E-02 | 1.05E-01 | 2.82E-01 | 3  | CKB,CKM,CKMT2                                                                                                                                                                                                                                                      |
| MAP00562        | MAP00562                                  | 8.32E-02 | 1.67E-01 | 6.82E-01 | 1.00E+00 | 2  | PIK3C2G,ITPKA                                                                                                                                                                                                                                                      |

|                                  |                                                                                                                           |          |          |          |          |    |                                                                                                                                                                                                                                                                            |
|----------------------------------|---------------------------------------------------------------------------------------------------------------------------|----------|----------|----------|----------|----|----------------------------------------------------------------------------------------------------------------------------------------------------------------------------------------------------------------------------------------------------------------------------|
| MAP00251                         | MAP00251                                                                                                                  | 9.09E-02 | 1.67E-01 | 6.82E-01 | 1.00E+00 | 2  | GLUL,GPT                                                                                                                                                                                                                                                                   |
| MAP00480                         | MAP00480                                                                                                                  | 1.07E-01 | 1.84E-01 | 7.53E-01 | 1.00E+00 | 2  | GPX3,GSTA2                                                                                                                                                                                                                                                                 |
| MAP00260                         | MAP00260                                                                                                                  | 1.15E-01 | 1.84E-01 | 7.53E-01 | 1.00E+00 | 2  | MAOA,BHMT                                                                                                                                                                                                                                                                  |
| MAP00532                         | MAP00532                                                                                                                  | 1.65E-01 | 2.37E-01 | 9.69E-01 | 1.00E+00 | 1  | XYLT2                                                                                                                                                                                                                                                                      |
| <b>MSigDB C2 BIOCARTA (v6.0)</b> |                                                                                                                           |          |          |          |          |    |                                                                                                                                                                                                                                                                            |
| M5889                            | Ensemble of genes encoding extracellular matrix and extracellular matrix-associated proteins                              | 2.63E-03 | 3.55E-02 | 1.63E-01 | 1.42E-01 | 41 | LGALS9C,COL6A5,F13A1,S100P,SERPINA4,CCL28,FGA,FGB,FGG,COL2A1,PAPPA2,COL4A6,COL17A1,HYAL1,CXCL14,HAPLN1,IGFALS,IGFBP2,SCUBE2,PDGFD,SLPI,CSTA,CTSE,MUC1,MUC6,SERPINB7,LGALS9B,NRG4,ADAM28,BMP5,SEMA3B,ANGPTL3,ADAMTS15,DPT,ADAMTSL1,MUC5B,CCBE1,ANXA10,REG3A,CLEC3B,SERPINA5 |
| M5885                            | Ensemble of genes encoding ECM-associated proteins including ECM-affiliated proteins, ECM regulators and secreted factors | 9.91E-03 | 8.92E-02 | 4.08E-01 | 5.35E-01 | 30 | LGALS9C,F13A1,S100P,SERPINA4,CCL28,PAPPA2,HYAL1,CXCL14,SCUBE2,PDGFD,SLPI,CSTA,CTSE,MUC1,MUC6,SERPINB7,LGALS9B,NRG4,ADAM28,BMP5,SEMA3B,ANGPTL3,ADAMTS15,ADAMTSL1,MUC5B,CCBE1,ANXA10,REG3A,CLEC3B,SERPINA5                                                                   |
| M3468                            | Genes encoding enzymes and their regulators involved in the remodeling of the extracellular matrix                        | 1.89E-02 | 1.46E-01 | 6.68E-01 | 1.00E+00 | 12 | F13A1,SERPINA4,PAPPA2,HYAL1,SLPI,CSTA,CTSE,SERPINB7,ADAM28,ADAMTS15,ADAMTSL1,SERPINA5                                                                                                                                                                                      |
| M18053                           | Reversal of Insulin Resistance by Leptin                                                                                  | 3.05E-02 | 1.52E-01 | 6.95E-01 | 1.00E+00 | 2  | PRKAA2,LEPR                                                                                                                                                                                                                                                                |
| M5880                            | Genes encoding proteins affiliated structurally or functionally to extracellular matrix proteins                          | 3.10E-02 | 1.52E-01 | 6.95E-01 | 1.00E+00 | 9  | LGALS9C,MUC1,MUC6,LGALS9B,SEMA3B,MUC5B,ANXA10,REG3A,CLEC3B                                                                                                                                                                                                                 |
| M2404                            | Mechanism of Gene Regulation by Peroxisome Proliferators via PPAR(alpha)                                                  | 5.99E-02 | 2.70E-01 | 1.00E+00 | 1.00E+00 | 4  | ME1,NR0B2,APOA1,CD36                                                                                                                                                                                                                                                       |
| M5884                            | Ensemble of genes encoding core extracellular matrix including ECM glycoproteins, collagens and proteoglycans             | 9.35E-02 | 3.89E-01 | 1.00E+00 | 1.00E+00 | 11 | COL6A5,FGA,FGB,FGG,COL2A1,COL4A6,COL17A1,HAPLN1,IGFALS,IGFBP2,DPT                                                                                                                                                                                                          |
| M9378                            | Interleukin 4 (IL-4) Pathway                                                                                              | 1.41E-01 | 5.44E-01 | 1.00E+00 | 1.00E+00 | 2  | SERPINA4,NR0B2                                                                                                                                                                                                                                                             |
| M5202                            | Hypoxia and p53 in the Cardiovascular system                                                                              | 4.48E-01 | 6.72E-01 | 1.00E+00 | 1.00E+00 | 1  | NQO1                                                                                                                                                                                                                                                                       |
| M5883                            | Genes encoding secreted soluble factors                                                                                   | 5.15E-01 | 6.78E-01 | 1.00E+00 | 1.00E+00 | 9  | S100P,CCL28,CXCL14,SCUBE2,PDGFD,NRG4,BMP5,ANGPTL3,CCBE1                                                                                                                                                                                                                    |
| <b>Panther DB</b>                |                                                                                                                           |          |          |          |          |    |                                                                                                                                                                                                                                                                            |
| P04372                           | 5-Hydroxytryptamine degradation                                                                                           | 1.01E-02 | 1.70E-01 | 7.33E-01 | 4.12E-01 | 3  | MAOA,ALDH1A1,ALDH3A1                                                                                                                                                                                                                                                       |
| P02744                           | Fructose galactose metabolism                                                                                             | 1.25E-02 | 1.70E-01 | 7.33E-01 | 5.11E-01 | 2  | ALDOB,ALDOC                                                                                                                                                                                                                                                                |
| P05914                           | Nicotine degradation                                                                                                      | 6.84E-02 | 6.54E-01 | 1.00E+00 | 1.00E+00 | 2  | UGT1A10,UGT1A6                                                                                                                                                                                                                                                             |
| P02745                           | Glutamine glutamate conversion                                                                                            | 9.80E-02 | 6.54E-01 | 1.00E+00 | 1.00E+00 | 1  | GLUL                                                                                                                                                                                                                                                                       |
| P00037                           | Ionotropic glutamate receptor pathway                                                                                     | 1.12E-01 | 6.54E-01 | 1.00E+00 | 1.00E+00 | 3  | SLC1A2,STX19,GRIA4                                                                                                                                                                                                                                                         |
| P05726                           | 2-arachidonoylglycerol biosynthesis                                                                                       | 1.43E-01 | 7.35E-01 | 1.00E+00 | 1.00E+00 | 1  | LIPH                                                                                                                                                                                                                                                                       |

|                         |                                                                                  |          |          |          |          |   |                               |
|-------------------------|----------------------------------------------------------------------------------|----------|----------|----------|----------|---|-------------------------------|
| P02772                  | Pyruvate metabolism                                                              | 1.65E-01 | 7.53E-01 | 1.00E+00 | 1.00E+00 | 1 | ME1                           |
| P04396                  | Vitamin D metabolism and pathway                                                 | 2.07E-01 | 8.48E-01 | 1.00E+00 | 1.00E+00 | 1 | GC                            |
| P00026                  | Heterotrimeric G-protein signaling pathway-Gialpha and Gs alpha mediated pathway | 7.40E-01 | 9.97E-01 | 1.00E+00 | 1.00E+00 | 3 | HRH2,HTR1E,SSTR1              |
| P00047                  | PDGF signaling pathway                                                           | 8.38E-01 | 9.97E-01 | 1.00E+00 | 1.00E+00 | 2 | SPDEF,RPS6KA6                 |
| <b>Pathway Ontology</b> |                                                                                  |          |          |          |          |   |                               |
| PW:0000482              | lipoprotein metabolic                                                            | 2.46E-04 | 7.38E-03 | 3.45E-02 | 1.48E-02 | 4 | APOA1,APOA4,APOBE C1,APOC3    |
| PW:0000057              | carbon fixation                                                                  | 2.46E-04 | 7.38E-03 | 3.45E-02 | 1.48E-02 | 4 | ME1,FBP1,ALDOC,GPT            |
| PW:0000419              | water transport                                                                  | 1.23E-03 | 1.47E-02 | 6.88E-02 | 7.35E-02 | 3 | AQP4,AQP5,AQP10               |
| PW:0000373              | glutathione conjugation                                                          | 1.23E-03 | 1.47E-02 | 6.88E-02 | 7.35E-02 | 3 | GSTA1,GSTA2,GSTA3             |
| PW:0000579              | somatostatinsignaling                                                            | 9.06E-03 | 5.44E-02 | 2.54E-01 | 5.44E-01 | 2 | SST,SSTR1                     |
| PW:0000033              | energy metabolic                                                                 | 2.61E-02 | 1.05E-01 | 4.89E-01 | 1.00E+00 | 1 | AMPD1                         |
| PW:0000357              | energy homeostasis                                                               | 5.03E-02 | 1.26E-01 | 5.88E-01 | 1.00E+00 | 1 | LEPR                          |
| PW:0000539              | ghrelin system                                                                   | 5.03E-02 | 1.26E-01 | 5.88E-01 | 1.00E+00 | 1 | GHRL                          |
| PW:0000533              | glycogen metabolic                                                               | 1.21E-01 | 2.20E-01 | 1.00E+00 | 1.00E+00 | 1 | GCKR                          |
| PW:0000454              | cholesterol biosynthetic                                                         | 3.72E-01 | 4.37E-01 | 1.00E+00 | 1.00E+00 | 1 | DHCR24                        |
| <b>SMPDB</b>            |                                                                                  |          |          |          |          |   |                               |
| SMP00246                | Pirenzepine Pathway                                                              | 4.99E-05 | 9.27E-04 | 5.10E-03 | 6.83E-03 | 5 | HRH2,ATP4A,ATP4B,S ST,CCKBR   |
| SMP00006                | Tyrosine Metabolism                                                              | 2.96E-04 | 3.69E-03 | 2.03E-02 | 4.05E-02 | 5 | HGD,MAOA,ALDH3A1, DUOX2,DUOX1 |
| SMP00281                | Anistreplase Pathway                                                             | 5.89E-04 | 3.95E-03 | 2.17E-02 | 8.07E-02 | 4 | F13A1,FGA,FGB,FGG             |
| SMP00260                | Clopidogrel Pathway                                                              | 9.51E-04 | 3.95E-03 | 2.17E-02 | 1.30E-01 | 4 | CYP2C19,CYP2C9,CYP 3A4,CYP3A5 |
| SMP00127                | Glucose-Alanine Cycle                                                            | 1.91E-03 | 7.68E-03 | 4.23E-02 | 2.61E-01 | 2 | GPT2,GPT                      |
| SMP00074                | Retinol Metabolism                                                               | 1.01E-02 | 3.93E-02 | 2.16E-01 | 1.00E+00 | 3 | ALDH1A1,RDH12,DHR S9          |
| SMP00073                | Butyrate Metabolism                                                              | 1.64E-02 | 6.05E-02 | 3.33E-01 | 1.00E+00 | 2 | ACSM1,OXCT1                   |
| SMP00330                | Tocainide Pathway                                                                | 2.43E-01 | 3.60E-01 | 1.00E+00 | 1.00E+00 | 2 | KCNQ1,KCNE2                   |
| SMP00110                | Indapamide Pathway                                                               | 2.47E-01 | 3.60E-01 | 1.00E+00 | 1.00E+00 | 1 | CLCNKA                        |
| SMP00134                | Spirolactone Pathway                                                             | 2.85E-01 | 3.75E-01 | 1.00E+00 | 1.00E+00 | 1 | SCNN1B                        |

**Table 5** The enriched GO terms of the up regulated differentially expressed genes

| GO ID      | CATEGORY | GO Name                              | P Value  | FDR B&H  | FDR B&Y  | Bonferroni | Gene Count | Gene                                                                                                                                                                                                                                                                                                                                                                                                                                                                                                                                                          |
|------------|----------|--------------------------------------|----------|----------|----------|------------|------------|---------------------------------------------------------------------------------------------------------------------------------------------------------------------------------------------------------------------------------------------------------------------------------------------------------------------------------------------------------------------------------------------------------------------------------------------------------------------------------------------------------------------------------------------------------------|
| GO:0043062 | BP       | extracellular structure organization | 3.09E-46 | 9.74E-43 | 9.09E-42 | 1.95E-42   | 83         | ABCA1,MFAP2,FAP,SER PINB5,FBN1,AEBP1,LIP G,ACAN,AGT,ANTXR1,F LRT2,MMP1,MMP3,MM P7,MMP9,MMP11,MMP1 4,MMP16,FOXC1,COL1A 1,COL1A2,COL3A1,COL 4A1,COL4A2,COL5A1,C OL5A2,NID2,COL6A3,C OL7A1,COL8A1,ITGA11, COL10A1,COL11A1,COL 12A1,SFRP2,COL15A1,C OL16A1,FN1,COMP,ADA MTS4,ADAMTS2,TNC,O LFML2B,ICAM1,COL5A 3,CCDC80,APOC1,APOE, MSR1,PDPN,VCAN,ADA MTS14,FSCN1,CTSK,IL6, SPARC,HTRA1,SPP1,ITG A5,ITGAX,ITGB8,BGN,B MP1,SULF2,PXDN,ADA MTS9,SULF1,NOTCH1,P LA2G7,LAMA5,ADAM12 ,SERPINH1,TNFRSF11B, TGFBI,COL18A1,THBS1, SH3PXD2B,TIMP1,LOXL 2,SERPINE1,ELN,GREM |



| GO ID      | BP | cell adhesion                                            | 3.95E-35 | 8.29E-32 | 7.73E-31 | 2.49E-31 | 121 | 1,LUM<br>FSTL3,SCARF2,EMILIN2,ACTN1,TRIM29,DYSF1,TGFB1,FAP,LRFN4,SERPINE2,FBN1,ACAN,SPO N2,AGT,ANTXR1,CCR1,PLAU,FLRT2,GPNMB,PLEK,MMP14,PLXNA1,CO L1A1,COL3A1,SELE,SEL L,ONECUT2,COL5A1,ZN F703,NID2,COL6A3,COL 7A1,COL8A1,ITGA11,CO L12A1,SFRP2,COL15A1, COL16A1,ANGPT2,FN1, COMP,TNC,PODXL,ICAM1,MXRA8,COL5A3,CC DC80,C2CD4A,CLDN4,C LDN3,CLDN7,PDPN,CSF 3R,IGFBP7,VCAN,HAPL N3,IGSF9B,IL2RA,IL6,M YB,BOC,CLSTN3,MYH1 0,IDO1,SPOCK1,SPP1,PI EZO1,LRRC32,ISLR,ITG A5,PARVG,ITGAX,RCC2 ,ITGB8,CD84,SRPX2,AD AMTS9,PTPRO,NTM,GLI 2,KIF14,NOTCH1,AMIG O2,LILRB4,KIF26B,LAM A5,MUC16,OMD,ADAM 12,OLR1,CLDN2,CLDN1, ADAMTS12,HAVCR2,TG FB1,COL18A1,TGM2,TH BS1,THBS2,THBS4,THY 1,CELSR3,HMCN1,PLXN C1,LOXL2,ENTPD1,SER PINE1,KIRREL1,ROBO2, DUSP10,GREM1,TNFAIP 6,AJUBA,LEF1,CDH3,CD H11,CDH13,CDH17,MSL N,EPHA3,EPHB1 |
|------------|----|----------------------------------------------------------|----------|----------|----------|----------|-----|-------------------------------------------------------------------------------------------------------------------------------------------------------------------------------------------------------------------------------------------------------------------------------------------------------------------------------------------------------------------------------------------------------------------------------------------------------------------------------------------------------------------------------------------------------------------------------------------------------------------------------------------------------------------------------------------------------------------------------------------------------------------------------------------------------------------|
| GO:0007155 | BP | cell adhesion                                            | 3.95E-35 | 8.29E-32 | 7.73E-31 | 2.49E-31 | 121 |                                                                                                                                                                                                                                                                                                                                                                                                                                                                                                                                                                                                                                                                                                                                                                                                                   |
| GO:0048646 | BP | anatomical structure formation involved in morphogenesis | 5.46E-25 | 6.88E-22 | 6.42E-21 | 3.44E-21 | 99  | EPHB2,CDX2,PDGFRB,C D109,ACTN1,CHI3L1,DY SF,PGF,MFAP2,FAP,AGT ,CXCL9,CTHRC1,PLAU, GPNMB,ALDH1A3,MMP 9,MMP14,FOXC1,COL1A 1,COL4A1,COL4A2,COL 5A1,COL5A2,COL7A1,C OL8A1,COL11A1,COL12 A1,SFRP2,COL15A1,AN GPT2,FN1,PODXL,MTHF D1L,GDF15,WNT2,VASH 1,MYOM3,OSR2,STIL,X RCC2,AQP1,PDPN,CSF3 R,PRKDC,IL6,MYH10,SP ARC,HTRA1,INHBA,ITG A5,NEB,ITGAX,PTGS2,I TGB8,LRP8,SRPX2,APL N,ADAMTS9,SULF1,SPH K1,GLI2,C3,C5AR1,STR A6,NOP2,NOTCH1,NOT CH3,WDR72,TCOF1,PLX DC1,KIF26B,LAMA5,ES M1,SALL4,TEAD4,TYMP ,ADAM12,EDNRA,FMNL 3,TGFBI,LIF,COL18A1,H EYL,TGM2,THBS1,THBS 2,THBS4,THY1,EGR2,LO XL2,SERPINE1,TREM2,R OBO2,TNFAIP2,GREM1,                                                                                                                                                                                      |

|            |    |                                |          |          |          |          |     |                                                                                                                                                                                                                                                                                                                                                                                                                                                                                                                                                                                                                                                                                                                                                                                                                          |
|------------|----|--------------------------------|----------|----------|----------|----------|-----|--------------------------------------------------------------------------------------------------------------------------------------------------------------------------------------------------------------------------------------------------------------------------------------------------------------------------------------------------------------------------------------------------------------------------------------------------------------------------------------------------------------------------------------------------------------------------------------------------------------------------------------------------------------------------------------------------------------------------------------------------------------------------------------------------------------------------|
| GO:0072359 | BP | circulatory system development | 4.85E-23 | 5.09E-20 | 4.75E-19 | 3.05E-19 | 94  | LEF1,CDH13,EPHB1<br>EPHB2,CDX2,PDGFRB,P<br>DLIM7,CHI3L1,DYSF,PG<br>F,HOXA13,FAP,FBN1,AC<br>AN,AGT,ANTXR1,PLAU,<br>FLRT2,GPNMB,MMP9,M<br>MP14,BICC1,FOXC1,CO<br>L1A1,COL1A2,COL3A1,F<br>OXM1,COL4A1,FOXS1,C<br>OL4A2,COL5A1,COL8A1<br>,PRRX1,COL11A1,SFRP2<br>,COL15A1,ANGPT2,FN1,<br>COMP,WNT2,VASH1,M<br>YOM3,NOX4,STIL,APOE<br>,AQP1,PDPN,VCAN,PRK<br>DC,IL6,MYH10,SPARC,I<br>TGA5,NEB,ITGAX,PTGS<br>2,ITGB8,SRPX2,APLN,A<br>DAMTS9,SULF1,SPHK1,<br>GLI2,C3,C5AR1,STRA6,<br>NOTCH1,NOTCH3,CAD,<br>PLXDC1,LAMA5,ESM1,S<br>ALL4,TYMP,ADAM12,E<br>DNRA,FMNL3,TGFBI,LI<br>F,COL18A1,HEYL,THBS<br>1,THBS2,SH3PXD2B,TH<br>BS4,THY1,LOXL2,SERPI<br>NE1,ROBO2,ELN,TNFAI<br>P2,GREM1,LY6E,LEF1,C<br>DH13,EPHA3,EPHB1                                                                                                            |
| GO:0016477 | BP | cell migration                 | 4.08E-22 | 2.57E-19 | 2.40E-18 | 2.57E-18 | 109 | PRR5L,PDGFRB,TRPM2,<br>CLEC7A,DYSF,F2R,PGF,<br>ITGBL1,FAP,HOXB9,SE<br>RPINE2,FCER1G,ANLN,<br>ACAN,AGT,CXCL9,ASP<br>M,CTHRC1,CCL3,CCR1,<br>PLAU,FLRT2,MMP1,GP<br>NMB,CCL18,FGR,MMP9,<br>MMP14,CXCL6,PLXNA1,<br>FOXC1,COL1A1,COL1A2<br>,COL3A1,SELE,SELL,SE<br>MA6B,VIL1,ONECUT2,C<br>OL5A1,ZNF703,ITGA11,<br>SFRP2,ANGPT2,FN1,PO<br>DXL,ICAM1,VASH1,IFIT<br>M1,NOX4,APOE,AQP1,P<br>DPN,MAPK15,CSF3R,VC<br>AN,FSCN1,IL6,DOCK4,M<br>YH10,SPARC,EPPK1,SP<br>OCK1,SPP1,ITGA5,ITGA<br>X,PTGS2,RCC2,ITGB8,L<br>RP8,CD84,SRPX2,ADAM<br>TS9,PTPRO,SULF1,SPHK<br>1,KIF14,FAM83D,C5AR1,<br>NOTCH1,PLA2G7,DPYS<br>L3,CD248,LAMA5,CXCL<br>1,OLR1,EDNRA,ADAMT<br>S12,FMNL3,COL18A1,T<br>HBS1,THBS4,THY1,CEL<br>SR3,TIMP1,PLXNC1,LO<br>XL2,SERPINE1,TREM2,T<br>REM1,DUSP10,GREM1,T<br>NFAIP6,AJUBA,LEF1,PA<br>DI2,CDH13,EPHA3,EPHB<br>1 |
| GO:0051674 | BP | localization of cell           | 2.01E-20 | 8.45E-18 | 7.88E-17 | 1.27E-16 | 112 | PRR5L,PDGFRB,TRPM2,<br>CLEC7A,DYSF,F2R,PGF,<br>ADCY3,ITGBL1,FAP,HO<br>XB9,SERPINE2,FCER1G,<br>ANLN,ACAN,AGT,CXCL                                                                                                                                                                                                                                                                                                                                                                                                                                                                                                                                                                                                                                                                                                         |

|            |    |                                             |          |          |          |          |     |                                                                                                                                                                                                                                                                                                                                                                                                                                                                                                                                                                                                                                   |
|------------|----|---------------------------------------------|----------|----------|----------|----------|-----|-----------------------------------------------------------------------------------------------------------------------------------------------------------------------------------------------------------------------------------------------------------------------------------------------------------------------------------------------------------------------------------------------------------------------------------------------------------------------------------------------------------------------------------------------------------------------------------------------------------------------------------|
|            |    |                                             |          |          |          |          |     | 9,ASPM,CTHRC1,CCL3,CCR1,PLAU,FLRT2,MM P1,GPNMB,CCL18,FGR, MMP9,MMP14,CXCL6,P LXNA1,FOXC1,COL1A1, COL1A2,COL3A1,SELE, SELL,SEMA6B,VIL1,ON ECUT2,COL5A1,ZNF703, ITGA11,SFRP2,ANGPT2, FN1,PODXL,ICAM1,VAS H1,IFITM1,NOX4,CLDN7 ,APOE,AQP1,PDPN,MAP K15,CSF3R,VCAN,FSCN 1,IL6,DOCK4,MYH10,SP ARC,EPPK1,SPOCK1,SP P1,ITGA5,ITGAX,PTGS2, RCC2,ITGB8,LRP8,CD84, SRPX2,ADAMTS9,PTPR O,SULF1,SPHK1,KIF14,F AM83D,C5AR1,NOTCH1, PLA2G7,CACNA1E,DPY SL3,CD248,LAMA5,CXC L1,OLR1,EDNRA,ADAM TS12,FMNL3,COL18A1,T HBS1,THBS4,THY1,CEL SR3,TIMP1,PLXNC1,LO XL2,SERPINE1,TREM2,T REM1,DUSP10,GREM1,T NFAIP6,AJUBA,LEF1,PA DI2,CDH13,EPHA3,EPHB 1 |
| GO:0009887 | BP | animal organ morphogenesis                  | 1.13E-18 | 3.94E-16 | 3.67E-15 | 7.09E-15 | 83  | EPHB2,CDX2,PDGFRB,ETV4,MDFI,PGF,FANCD2,HOXA13,MFAP2,SERPIN B5,FBN1,MGP,ACAN,AG T,RECQL4,SNX10,MKI67 ,CTHRC1,PLAU,FLRT2,F GR,ALDH1A3,MMP14,M MP16,PLXNA1,FOXC1,C OL1A1,COL1A2,COL3A1 ,ONECUT2,COL5A1,COL 5A2,COL6A3,COL7A1,C OL8A1,PRRX1,COL11A1 ,COL12A1,SFRP2,SFRP4, COMP,TNC,MTHFD1L, WNT2,MYOM3,OSR2,ST IL,AQP1,CSF3R,IL6,HTR A1,INHBA,ASPN,ITGAX, BMP1,SULF2,SULF1,GLI 2,STRA6,NOTCH1,WDR7 2,KIF26B,LAMA5,TYMP, SERPINH1,EDNRA,TNF RSF11B,LIF,COL18A1,H EYL,TGM2,THBS1,SH3P XD2B,THY1,CELSR3,P2 RX7,SERPINE1,ROBO2,ELN,GREM1,LY6E,LEF1,EPHB1                                                                                  |
| GO:0042127 | BP | regulation of cell population proliferation | 1.85E-15 | 4.23E-13 | 3.95E-12 | 1.17E-11 | 101 | CDX2,PDGFRB,ATAD5,CD109,CLEC7A,ETV4,D YSF,F2R,PGF,FAP,SERPINB5,SERPINE2,CAMK2 N1,AGT,RECQL4,CXCL9 ,ASPM,CTHRC1,PLAU,G PNM, MMP7, MMP9, IQG AP3,FOXMI,ZNF703,PR RX1,SFRP2,SFRP4, FN1,COMP,TNC,WNT2,VASH1 ,OSR2,IFITM1,NOX4,CL DN7,APOE,LGR5,AQP1,P                                                                                                                                                                                                                                                                                                                                                                                 |

|            |    |                                              |          |          |          |          |                                                                                                                                                                                                                                                                                                                                                                                                                                                                    |                                                                                                                                                                                                                                                                                                                                                                                                                                                                                                                                                                                                                                                                                    |
|------------|----|----------------------------------------------|----------|----------|----------|----------|--------------------------------------------------------------------------------------------------------------------------------------------------------------------------------------------------------------------------------------------------------------------------------------------------------------------------------------------------------------------------------------------------------------------------------------------------------------------|------------------------------------------------------------------------------------------------------------------------------------------------------------------------------------------------------------------------------------------------------------------------------------------------------------------------------------------------------------------------------------------------------------------------------------------------------------------------------------------------------------------------------------------------------------------------------------------------------------------------------------------------------------------------------------|
|            |    |                                              |          |          |          |          | <p>DPN,MAPK15,IGFBP7,M<br/>TBP,PRKDC,IL2RA,IL6,<br/>H19,MYB,IL11,SPARC,H<br/>TRA1,EPPK1,IDO1,INHBA,<br/>LRRC32,ITGAX,PTGS<br/>2,RTKN2,SULF2,APLN,S<br/>ULF1,SPHK1,GLI2,NRK,<br/>KIF14,C5AR1,NOP2,NOT<br/>CH1,NOTCH3,RARRES1,<br/>CD248,LAMA5,MUC16,E<br/>SM1,E2F3,SLC39A10,CX<br/>CL1,EDNRA,CCND2,HA<br/>VCR2,ORC1,LIF,COL18A<br/>1,TGM2,OSM,THBS1,TH<br/>BS4,TIMP1,CDCA7,SERP<br/>INE1,DUSP10,ELN,GRE<br/>M1,OSMR,CDC6,CDC25<br/>B,LEF1,CDH3,CDH13,EP<br/>HB1</p> |                                                                                                                                                                                                                                                                                                                                                                                                                                                                                                                                                                                                                                                                                    |
|            | BP | positive regulation of developmental process | 4.56E-14 | 8.99E-12 | 8.38E-11 | 2.88E-10 | 88                                                                                                                                                                                                                                                                                                                                                                                                                                                                 | <p>EPHB2,PDE3A,CDX2,PD<br/>GFRB,ATAD5,PDLIM7,C<br/>LEC7A,CHI3L1,PGF,SER<br/>PINE2,AGT,CXCL9,ASP<br/>M,CTHRC1,CCL3,CCR1,<br/>FLRT2,MMP9,MMP14,IQ<br/>GAP3,PLXNA1,FOXC1,C<br/>OL1A1,FOXO1,VIL1,ZNF<br/>703,SFRP2,SFRP4,ANGP<br/>T2,FN1,GDF15,WNT2,EN<br/>C1,PKDCC,OSR2,IFITM1<br/>,XRCC2,APOE,AQP1,CR<br/>ABP2,MSR1,PDPN,PRKD<br/>C,IL2RA,IL6,MYB,BOC,<br/>CLSTN3,IDO1,INHBA,IT<br/>GA5,ITGAX,PTGS2,ITGB<br/>8,LRP8,BMP1,GDPD5,SR<br/>PX2,ADAMTS9,SPHK1,G<br/>LI2,C3,C5AR1,NOTCH1,<br/>AMIGO2,LILRB4,DPYSL<br/>3,KRT17,TEAD4,ADAM1<br/>2,ECT2,EDNRA,LIF,HEY<br/>L,THBS1,THBS2,SH3PX<br/>D2B,P2RX7,PLXNC1,LO<br/>XL2,SERPINE1,TREM2,R<br/>OBO2,DUSP10,GREM1,L<br/>EF1,EPHA3,EPHB1</p> |
| GO:0001775 | BP | cell activation                              | 3.82E-12 | 5.35E-10 | 4.99E-09 | 2.41E-08 | 81                                                                                                                                                                                                                                                                                                                                                                                                                                                                 | <p>LPCAT1,PDGFRB,ATAD<br/>5,ABCA13,CLEC5A,TRP<br/>M2,CLEC7A,DGKH,ACT<br/>N1,CHI3L1,DYSF,F2R,F2<br/>RL2,FANCD2,SERPINE2,<br/>FCER1G,FCGR2A,FCGR<br/>3A,FCGR3B,AGT,CCL3,P<br/>LAU,GPNMB,FGR,PLEK,<br/>MMP9,MMP14,CXCL6,C<br/>OL1A1,COL1A2,COL3A1<br/>,SELL,FN1,COMP,CD300<br/>LF,FPR1,ICAM1,KCNAB<br/>2,APOE,SLC2A3,PDPN,S<br/>LC11A1,PRKDC,CTSB,IL<br/>2RA,IL6,MYB,IL11,IDO1,<br/>INHBA,LRRC32,ITGAX,<br/>CD84,SPHK1,GLI2,C3,AT<br/>P11A,C5AR1,LILRB4,LIL<br/>RB3,RAB31,SLC39A10,L<br/>CP2,NFAM1,CXCL1,OLR<br/>1,HAVCR2,THBS1,THY1,<br/>P2RX7,TIMP1,ENTPD1,T<br/>REM2,EXO1,DUSP10,TN<br/>FAIP6,LEF1,PADI2,PIK3</p>                                                                  |

|            |    |                                           |          |          |          |          |    |                                                                                                                                                                                                                                                                                                                                                                                                                                                                                                                                                                                                                                                                         |
|------------|----|-------------------------------------------|----------|----------|----------|----------|----|-------------------------------------------------------------------------------------------------------------------------------------------------------------------------------------------------------------------------------------------------------------------------------------------------------------------------------------------------------------------------------------------------------------------------------------------------------------------------------------------------------------------------------------------------------------------------------------------------------------------------------------------------------------------------|
| GO:0009719 | BP | response to endogenous stimulus           | 2.73E-11 | 3.37E-09 | 3.15E-08 | 1.72E-07 | 88 | R5,CDH17,EPHB1<br>ABCA1,PDE3A,FSTL3,P<br>DGFRB,TRPM2,CD109,M<br>CM7,PGF,ADCY3,HOXA<br>13,NOD1,FBN1,FCER1G,<br>AGT,FLRT2,BMP8A,FBX<br>O32,MMP14,FOXC1,COL<br>1A1,COL1A2,COL3A1,C<br>OL4A1,COL4A2,VIL1,O<br>NECUT2,COL5A2,ZNF70<br>3,MXRA5,SFRP2,SFRP4,<br>COL16A1,CHRD2,COM<br>P,TNC,GDF15,WNT2,ICA<br>M1,NOX4,CLDN4,APOE,<br>CPS1,LGR5,AQP1,AQP9,<br>MAPK15,IGFBP7,STC2,P<br>RKDC,CTSB,IL6,SPARC,<br>HTRA1,INHBA,SPP1,AS<br>PN,LRR32,NCF2,PMEP<br>A1,PTGS2,SULF2,APLN,<br>SULF1,SLC39A5,NOTCH<br>1,CAD,RAB31,CALD1,H<br>TRA3,CLDN1,ADAMTS1<br>2,HEYL,THBS1,FSTL1,P2<br>RX7,TIMP1,EGR2,SERPI<br>NE1,TREM2,ROBO2,LTB<br>P2,GREM1,LY6E,CDC6,L<br>EF1,PADI2,CDH13,EPHA<br>3 |
| GO:0019220 | BP | regulation of phosphate metabolic process | 3.84E-10 | 3.72E-08 | 3.47E-07 | 2.42E-06 | 90 | EPHB2,PIK3AP1,LPCAT1<br>,PRR5L,PDGFRB,CD109,<br>MCM7,DGKH,MDFI,CHI<br>3L1,F2R,PGF,ADCY3,NO<br>D1,CAMK2N1,FCGR1A,<br>AGT,PPP1R1B,CCL3,CC<br>R1,ABCD1,GPNMB,BMP<br>8A,CCL18,FGR,PLEK,M<br>MP9,PLK1,IQGAP3,FOX<br>M1,SFRP2,SFRP4,FN1,G<br>DF15,FPR1,ICAM1,NOX4<br>,APOC1,STIL,APOE,MAP<br>K15,SLC11A1,VCAN,TP<br>X2,PRKDC,CLSPN,IL6,IL<br>11,INHBA,ITGA5,PMEP<br>A1,PTGS2,LRP8,CD84,C<br>DCA2,FNDC1,SRPX2,AP<br>LN,SPHK1,NRK,KIF14,F<br>AM83D,C3,C5AR1,NOTC<br>H1,SLC39A10,LCP2,ECT<br>2,EDNRA,CCND2,PKMY<br>T1,CCNF,HAVCR2,LIF,O<br>SM,THBS1,THBS4,THY1,<br>CELSR3,P2RX7,ENTPD1,<br>TREM2,KIRREL1,DUSP1<br>0,GREM1,CDC6,CDC25B<br>,AJUBA,PIK3R5,EPHB1                     |
| GO:0031012 | CC | extracellular matrix                      | 3.68E-47 | 2.22E-44 | 1.55E-43 | 2.22E-44 | 89 | EMILIN2,CHI3L1,MFAP2<br>,SERPINE2,SERPINB9,F<br>BN1,MGP,AEBP1,ACAN,<br>SPON2,AGT,CTHRC1,FL<br>RT2,MMP1,MMP3,MMP7<br>,MMP9,MMP11,MMP14,<br>MMP16,COL1A1,COL1A<br>2,COL3A1,COL4A1,COL<br>4A2,COL5A1,COL5A2,NI<br>D2,COL6A3,COL7A1,CO<br>L8A1,COL10A1,COL11A<br>1,MXRA5,COL12A1,SFR<br>P2,COL15A1,COL16A1,F<br>N1,COMP,ADAMTS4,AD                                                                                                                                                                                                                                                                                                                                          |

|            |    |                                          |          |          |          |          |    |                                                                                                                                                                                                                                                                                                                                                                                                                                                                                                                                                                                                               |
|------------|----|------------------------------------------|----------|----------|----------|----------|----|---------------------------------------------------------------------------------------------------------------------------------------------------------------------------------------------------------------------------------------------------------------------------------------------------------------------------------------------------------------------------------------------------------------------------------------------------------------------------------------------------------------------------------------------------------------------------------------------------------------|
| GO:0062023 | CC | collagen-containing extracellular matrix | 1.56E-40 | 4.71E-38 | 3.29E-37 | 9.41E-38 | 74 | AMTS2,TNC,GDF15,OLF ML2B,WNT2,ICAM1,CO L5A3,CCDC80,CPZ,APO E,IGFBP7,VCAN,HAPLN 3,CTSB,SPARC,HTRA1,A SPN,LRRC32,BGN,BMP1 ,SRPX2,PXDN,ADAMTS 9,SULF1,CD248,LAMA5, OMD,SERPINH1,TNFRS F11B,TGFBI,COL18A1,T GM2,THBS1,THBS2,THB S4,ANGPTL2,HMCN1,PL XDC2,TIMP1,LOXL2,EN TPD1,SERPINE1,LTPB2, ELN,GREM1,LUM,CDH1 3,PCOLCE                                                                                                                                                                                                                                                                                          |
| GO:0005788 | CC | endoplasmic reticulum lumen              | 5.71E-19 | 1.15E-16 | 8.03E-16 | 3.45E-16 | 40 | EMILIN2,MFAP2,SERPI NE2,SERPINB9,FBN1,M GP,AEBP1,ACAN,AGT,C THRC1,MMP9,COL1A1, COL1A2,COL3A1,COL4 A1,COL4A2,COL5A1,CO L5A2,NID2,COL6A3,COL 7A1,COL8A1,COL10A1,C OL11A1,MXRA5,COL12 A1,SFRP2,COL15A1,COL 16A1,FN1,COMP,ADAM TS4,ADAMTS2,TNC,GD F15,WNT2,ICAM1,COL5 A3,CCDC80,APOE,IGFB P7,VCAN,CTSB,SPARC, HTRA1,ASPN,BGN,BMP 1,SRPX2,PXDN,ADAMT S9,SULF1,LAMA5,OMD, SERPINH1,TGFBI,COL18 A1,TGM2,THBS1,THBS2, THBS4,ANGPTL2,HMCN 1,PLXDC2,TIMP1,LOXL2 ,ENTPD1,SERPINE1,LTB P2,ELN,GREM1,LUM,CD H13,PCOLCE                                                                                                     |
| GO:0009986 | CC | cell surface                             | 4.90E-17 | 5.92E-15 | 4.14E-14 | 2.96E-14 | 71 | FSTL3,FBN1,COL1A1,C OL1A2,COL3A1,COL4A1 ,COL4A2,FKBP10,COL5 A1,COL5A2,COL6A3,CO L7A1,COL8A1,COL10A1, COL11A1,COL12A1,COL 15A1,COL16A1,FN1,GPX 8,TNC,MXRA8,COL5A3, APOE,IGFBP7,STC2,VC AN,IL6,SPP1,P4HA3,PTG S2,CYP2W1,C3,SERPINH 1,COL18A1,THBS1,FSTL 1,TIMP1,RCN3,MSLN ABCA1,PDGFRB,CLEC5 A,CD109,CLEC7A,F2R,IT GBL1,FAP,LRFN4,SERPI NE2,FCER1G,FCGR1A,F CGR3A,LIPG,CXCL9,AN TXR1,CCR1,PLAU,MMP 7,MMP16,SELL,NID2,SF RP4,WNT2,ICAM1,MXR A8,APOE,SLC1A3,PDPN, SLC11A1,CSF3R,VCAN, CTSB,IL2RA,IL6,BOC,CL STN3,SPARC,LRRC32,IT GA5,ITGAX,ITGB8,BGN, CYP2W1,LRP8,SRPX2,S ULF2,ADAMTS9,SULF1, MRC2,NTM,C3,C5AR1,N |



|            |    |                                        |          |          |          |          |    |                                                                                                                                                                                                                                                                                                                                                                                                                                                                                                                                                                                                 |
|------------|----|----------------------------------------|----------|----------|----------|----------|----|-------------------------------------------------------------------------------------------------------------------------------------------------------------------------------------------------------------------------------------------------------------------------------------------------------------------------------------------------------------------------------------------------------------------------------------------------------------------------------------------------------------------------------------------------------------------------------------------------|
| GO:0031226 | CC | intrinsic component of plasma membrane | 6.28E-08 | 3.45E-06 | 2.41E-05 | 3.79E-05 | 76 | OTCH1,NOTCH3,CD248, MUC16,NFAM1,HAVCR2,THBS1,THY1,P2RX7,ENTPD1,ROBO2,GREM1,OSMR,CDH3,CDH11,CDH13,CDH17,MSLN EPHB2,ABCA1,IGSF6,PDGFRB,CLEC5A,TRPM2,SLC24A3,F2R,F2RL2,ADCY3,ITGBL1,LRFN4,FCER1G,FADS2,CCR1,FLRT2,GPNMB,MMP14,MMP16,PLXNA1,SELE,SELL,SEMA6B,ITGA11,PODXL,ICAM1,KCNAB2,NOX4,CLDN4,CLDN3,LGR5,AQP1,SLC1A3,AQP9,SLC2A3,MSR1,PDPN,SLC11A1,CSF3R,IL2RA,IL6,BOC,CLSTN3,LRRC32,SLC28A3,NCF2,ITGA5,ITGAX,ITGB8,LAPTM5,GGT5,CD84,PTPRO,C5AR1,STRA6,SLC39A5,NOTCH1,NOTCH3,CACNA1E,LILRB3,GRIN2D,SLC39A10,OLR1,CLDN1,EDNRA,TGM2,THY1,P2RX7,PLXNC1,ENTPD1,TREM2,OSMR,GPOR176,CDH17,EPHA3,EPHB1 |
| GO:0099080 | CC | supramolecular complex                 | 1.39E-07 | 6.67E-06 | 4.66E-05 | 8.42E-05 | 67 | MAP1A,CENPF,NEIL2,PDLIM7,ACTN1,DYSF,KRT80,MFAP2,TUBB3,FBN1,ASPM,ANTXR1,FBXO32,PLK1,COL1A1,COL1A2,COL3A1,COL4A1,COL4A2,VIL1,COL5A1,COL5A2,COL6A3,COL7A1,COL8A1,KIF23,COL11A1,PODXL,MYOM3,KCNAB2,GAS7,NOX4,COL5A3,APOE,AQP1,PDPN,MAPK15,TPX2,KIF18B,FSCN1,AHNAK2,DOCK4,KIF21B,KNTC1,MYH10,EPPK1,IDO1,MYO7B,KIF4A,NEB,RCC2,CEP170,NEK2,GLI2,KIF14,DNM1,KIF2C,DPLYSL3,CALD1,KRT17,KIF26B,KIF20A,IFFO2,ELN,CKAP2,LUM,EPHB1                                                                                                                                                                           |
| GO:0030054 | CC | cell junction                          | 9.56E-07 | 3.40E-05 | 2.37E-04 | 5.78E-04 | 59 | PDGFRB,SCARF2,PDLIM7,ACTN1,TRIM29,ITGBL1,FAP,CAMK2N1,PLAU,FLRT2,MMP14,IQGAP3,ITGA11,KIF23,TNC,PODXL,ICAM1,MXRA8,KCNAB2,NOX4,CLDN4,CLDN3,CLDN7,PDPN,MAPK15,RAI14,IGSF9B,FSCN1,EPPK1,ITGA5,PARVG,ITGB8,FNDC1,SRPX2,SPHK1,MRC2,NOTCH1,PLXDC1,GRIN2D,LCP2,ECT2,CLDN2,CLDN1,CCNF,HAVCR2,TGM2,SH3PXD2B,THY1,HMCN1,P2RX7,LZTS1,KIRREL1,ILDR1,TNS4,AJUBA,CDH3,C                                                                                                                                                                                                                                         |

|            |    |                                             |          |          |          |          |    |                                                                                                                                                                                                                                                                                                                                                                                                                                                                                                                                                                                                                                                                                                             |
|------------|----|---------------------------------------------|----------|----------|----------|----------|----|-------------------------------------------------------------------------------------------------------------------------------------------------------------------------------------------------------------------------------------------------------------------------------------------------------------------------------------------------------------------------------------------------------------------------------------------------------------------------------------------------------------------------------------------------------------------------------------------------------------------------------------------------------------------------------------------------------------|
| GO:0099503 | CC | secretory vesicle                           | 1.13E-06 | 3.80E-05 | 2.65E-04 | 6.83E-04 | 50 | DH11,CDH13,CDH17<br>LPCAT1,FSTL3,ABCA13,<br>CLEC5A,TRPM2,CD109,<br>ACTN1,CH13L1,SERPINE<br>2,FCER1G,FCGR2A,FCG<br>R3B,SNX10,PLAU,FGR,<br>MMP9,COL1A1,SELL,FN<br>1,FPR1,KCNAB2,AQP1,S<br>LC2A3,SLC11A1,CTSB,K<br>LK6,SPARC,NCF2,ISLR,I<br>TGAX,SPHK1,C3,ATP11<br>A,C5AR1,DNM1,NOTCH<br>1,LILRB3,DPYSL3,RAB3<br>1,STK31,NFAM1,CXCL1,<br>OLR1,THBS1,THBS2,TI<br>MP1,ENTPD1,SERPINE1,<br>TNFAIP6,PADI2                                                                                                                                                                                                                                                                                                          |
| GO:0098805 | CC | whole membrane                              | 5.51E-04 | 6.69E-03 | 4.67E-02 | 3.33E-01 | 61 | LPCAT1,ABCA1,ABCA1<br>3,CLEC5A,TRPM2,CD10<br>9,ACTN1,DYSF,F2R,ADC<br>Y3,FCER1G,FCGR1A,FC<br>GR2A,FCGR3B,IFITM3,S<br>NX10,ANTXR1,PLAU,A<br>BCD1,GPNMB,SELE,SEL<br>L,PODXL,FPR1,ICAM1,K<br>CNAB2,APOE,AQP1,SLC<br>2A3,MSR1,PDPN,SLC11<br>A1,FAR2,CTSB,SPARC,B<br>CL2A1,ITGAX,PMEPA1,<br>FCHO1,PTGS2,RCC2,LR<br>P8,LAPTM5,RFTN1,SUL<br>F1,SPHK1,ATP11A,C5AR<br>1,LILRB3,RAB31,LCP2,N<br>FAM1,SERPINH1,OLR1,<br>EDNRA,GPR161,THY1,K<br>IRREL1,GNB4,CDH13,EP<br>HB1                                                                                                                                                                                                                                              |
| GO:0099513 | CC | polymeric cytoskeletal fiber                | 1.26E-03 | 1.23E-02 | 8.57E-02 | 7.61E-01 | 47 | MAP1A,CENPF,NEIL2,P<br>DLIM7,ACTN1,DYSF,KR<br>T80,TUBB3,ASPM,ANTX<br>R1,PLK1,VIL1,KIF23,PO<br>DXL,KCNAB2,GAS7,NO<br>X4,APOE,AQP1,PDPN,M<br>APK15,TPX2,KIF18B,FS<br>CN1,DOCK4,KIF21B,KN<br>TC1,MYH10,EPPK1,IDO1<br>,MYO7B,KIF4A,RCC2,CE<br>P170,NEK2,GLI2,KIF14,D<br>NM1,KIF2C,DPYSL3,CA<br>LD1,KRT17,KIF26B,KIF2<br>0A,IFFO2,CKAP2,EPHB1<br>EMILIN2,CHI3L1,MFAP2<br>,FBN1,MGP,AEBP1,ACA<br>N,CTHRC1,COL1A1,COL<br>1A2,COL3A1,COL4A1,C<br>OL4A2,COL5A1,COL5A2<br>,NID2,COL6A3,COL7A1,<br>COL8A1,COL10A1,COL1<br>1A1,MXRA5,COL12A1,C<br>OL15A1,COL16A1,FN1,C<br>OMP,TNC,COL5A3,IGFB<br>P7,VCAN,SPARC,ASPN,<br>BGN,SRPX2,PXDN,LAM<br>A5,TGFBI,COL18A1,THB<br>S1,THBS2,THBS4,HMCN<br>1,LTBP2,ELN,LUM,PCO<br>LCE |
| GO:0005201 | MF | extracellular matrix structural constituent | 1.10E-35 | 1.18E-32 | 8.92E-32 | 1.18E-32 | 47 | MAP1A,EMILIN2,ACTN1<br>,CHI3L1,MFAP2,TUBB3,<br>FBN1,MGP,AEBP1,ACA                                                                                                                                                                                                                                                                                                                                                                                                                                                                                                                                                                                                                                           |
| GO:0005198 | MF | structural molecule activity                | 2.77E-16 | 7.44E-14 | 5.63E-13 | 2.98E-13 | 61 | MAP1A,EMILIN2,ACTN1<br>,CHI3L1,MFAP2,TUBB3,<br>FBN1,MGP,AEBP1,ACA                                                                                                                                                                                                                                                                                                                                                                                                                                                                                                                                                                                                                                           |

|            |    |                              |          |          |          |          |    |                                                                                                                                                                                                                                                                                                                                                                                                                                                                                                                          |                                                                                                                                                                                                                                                                                                                                 |
|------------|----|------------------------------|----------|----------|----------|----------|----|--------------------------------------------------------------------------------------------------------------------------------------------------------------------------------------------------------------------------------------------------------------------------------------------------------------------------------------------------------------------------------------------------------------------------------------------------------------------------------------------------------------------------|---------------------------------------------------------------------------------------------------------------------------------------------------------------------------------------------------------------------------------------------------------------------------------------------------------------------------------|
|            |    |                              |          |          |          |          |    |                                                                                                                                                                                                                                                                                                                                                                                                                                                                                                                          | N,CTHRC1,COL1A1,COL1A2,COL3A1,COL4A1,COL4A2,COL5A1,COL5A2,NID2,COL6A3,COL7A1,COL8A1,COL10A1,COL11A1,MXRA5,COL12A1,COL15A1,COL16A1, FN1,COMP,TNC,MYOM3,COL5A3,CLDN4,CLDN3,CLDN7,APOE,IGFBP7,VCAN,SPARC,EPPK1,ASPN,NEB,BGN,SRPX2,PXDN,MARVELD1,KRT17,LAMA5,CLDN2,CLDN1,TGFBI,COL18A1,THBS1,THBS2,THBS4,HMCN1,LTBP2,ELN,LUM,PCOLCE |
| GO:0005102 | MF | signaling receptor binding   | 5.39E-10 | 7.24E-08 | 5.47E-07 | 5.79E-07 | 86 | EPHB2,PIK3API,ABCA1,MAP1A,PDGFRB,CLEC7A,ACTN1,CHN1,F2R,PGF,TUBB3,ITGBL1,FAP,SERPINE2,FBN1,FCGR1A,SPON2,AGT,PPP1R1B,CXCL9,CTHRC1,CCL3,FLRT2,GPNMB,BMP8A,CCL18,FGR,MMP9,MMP14,CXCL6,COL3A1,SEMA6B,COL5A1,SFRP2,COL16A1,ANGPT2, FN1,COMP,CD300LF,PILRA,GDF15, WNT2,FPR1,ICAM1,APOE,AQP1,PDPN,STC2,IL6,DKK2,DOCK4,IL11,INHBA,SPP1,ITGA5,ITGAX,ITGB8,BMP1,SRPX2,PXDN,APLN,C3,DNM1,NOTCH1,KRT17,LAMA5,ESM1,TYMP,CXCL1,TNFRSF11B,TGFBI,LIF,OSM,THBS1,THBS4,ANGPTL2,THY1,P2RX7,TIMP1,PLXNC1,SERPINE1,GREM1,LY6E,LEF1,PADI2,CDH17 |                                                                                                                                                                                                                                                                                                                                 |
| GO:0008233 | MF | peptidase activity           | 1.39E-07 | 7.13E-06 | 5.39E-05 | 1.50E-04 | 62 | CD109,CLEC7A,F2R,FAP,SERPINB5,SERPINE2,NOD1,SERPINB9,AEBP1,AGT,ANTXR1,PLAU,MMP1,MMP3,MMP7,MMP9,MMP11,MMP14,MMP16,VILL1,COL6A3,COL7A1,SFRP2, FN1,ADAMTS4,ADAMTS2,VASH1,CPZ,CPS1,AQP1,CST1,ADAMTS14,CLSPN,CTSB,ESPL1,CTSK,IL6,KLK6,HTRA1,SPOCK1,PTGS2,GGT5,BMP1,ADAMTS9,C1R,C3,FOXK1,RARRES1,RHBDF2,CAXM2,HTRA3,ADAM12,SERPINH1,PII5,ADAMTS12,THBS1,TIMP1,SERPINE1,CPXM1,LEF1,RCN3,PCOLCE                                                                                                                                  |                                                                                                                                                                                                                                                                                                                                 |
| GO:0098772 | MF | molecular function regulator | 3.16E-06 | 1.10E-04 | 8.30E-04 | 3.40E-03 | 77 | TRIO,CD109,CHI3L1,CHN1,PGF,SERPINB5,SERPINE2,NOD1,SERPINB9,FBN1,CAMK2N1,AGT,PPP1R1B,CXCL9,CCL3,FLRT2,GPNMB,BMP8A,CCL18,CXCL6,MMP16,SEMA                                                                                                                                                                                                                                                                                                                                                                                  |                                                                                                                                                                                                                                                                                                                                 |

|            |    |                                                        |          |          |          |          |    |                                                                                                                                                                                                                                                                                                                                                                                                                                                                                                                                                                                                                                                                                                                                                                                                                                                       |
|------------|----|--------------------------------------------------------|----------|----------|----------|----------|----|-------------------------------------------------------------------------------------------------------------------------------------------------------------------------------------------------------------------------------------------------------------------------------------------------------------------------------------------------------------------------------------------------------------------------------------------------------------------------------------------------------------------------------------------------------------------------------------------------------------------------------------------------------------------------------------------------------------------------------------------------------------------------------------------------------------------------------------------------------|
| GO:0016773 | MF | phosphotransferase activity, alcohol group as acceptor | 5.21E-06 | 1.65E-04 | 1.24E-03 | 5.60E-03 | 62 | 6B,VIL1,COL6A3,COL7A1,SFRP2, FN1, PLEKHG4, GDF15, WNT2, KCNAB2, APOC1, PLEKHG2, APOE, STC2, CST1, FGD6, IL6, DK K2, DOCK4, IL11, SPOCK1 ,INHBA, SPP1, NCF2, ARH GAP11A, GEM, RCC2, BMP1, PXDN, APLN, C3, NOT CH1, RARRES1, ARHGAP 39, TYMP, NCAPH, ECT2, S ERPINH1, CXCL1, PI15, R GS1, TNFRSF11B, CCND2 ,CCNF, LIF, OSM, SH3PXD 2B, THBS4, THY1, TIMP1, SERPINE1, GREM1, LY6E ,LEF1, PIK3R5, PCOLCE EPHB2, TRIO, PDGFRB, D GKH, MDFI, CHI3L1, F2R, ADCY3, NOD1, CAMK2N 1, FCGR1A, AGT, PPP1R1 B, CCL3, GPNMB, FGR, PL K1, IQGAP3, SFRP2, GDF1 5, FPR1, PKDCC, HKDC1, NOX4, STIL, APOE, MAPK 15, SLC11A1, TPX2, PRKD C, CLSPN, IL6, PGM2L1, L RP8, NEK2, SPHK1, NRK, B UB1, BUB1B, KIF14, C5AR 1, FOXK1, CAD, LCP2, STK 31, ECT2, EDNRA, CCND2, PKMYT1, CCNF, THBS1, T HY1, P2RX7, TREM2, DUS P10, GREM1, CDC6, CDC2 5B, AJUBA, PIK3R5, EPHA 3, EPHB1 |
| GO:0042802 | MF | identical protein binding                              | 2.99E-05 | 7.65E-04 | 5.78E-03 | 3.21E-02 | 76 | EPHB2, PIK3AP1, CENPF, HJURP, DGKH, ACTN1, M DFI, MCM10, TRIM29, TRI P13, PGF, FAP, NOD1, FBN 1, FCER1G, CCL3, ABCD1, C1QTNF6, ALDH1A3, PLE K, MMP9, PLK1, COL1A1, COL1A2, VIL1, COL7A1, F N1, MTHFD1L, GDF15, OL FML2B, MYOM3, CLDN4, CLDN3, CLDN7, STIL, AP OE, AQP1, SLC11A1, STC2 ,POLQ, MYH10, HTRA1, I NHBA, PIEZO1, BCAT1, B CL2A1, PTGS2, CD84, BM P1, SRPX2, APLN, GBP5, P TPRO, DNMI, SDS, NOTC H3, CAD, TYMP, ECT2, OL R1, CLDN2, CLDN1, HEYL , THBS1, HMCN1, P2RX7, E NTPD1, ROBO2, ILDR1, G REM1, PADI2, CDH3, CDH 11, TOP2A, CDH13, CDH17 EPHB2, ABCA1, TRIO, PD GFRB, ATAD5, ABCA13, MCM2, MCM7, DGKH, TR IP13, ADCY3, NOD1, REC QL4, MKI67, ABCD1, FGR, PLK1, RAD54L, KIF23, MT HFD1L, PKDCC, HKDC1, XRCC2, CPS1, ATAD2, M APK15, CHTF18, PRKDC, KIF18B, POLQ, KIF21B, M YH10, MYO7B, KIF4A, NE                                       |
| GO:0005524 | MF | ATP binding                                            | 4.81E-04 | 9.75E-03 | 7.37E-02 | 5.17E-01 | 56 | EPHB2, ABCA1, TRIO, PD GFRB, ATAD5, ABCA13, MCM2, MCM7, DGKH, TR IP13, ADCY3, NOD1, REC QL4, MKI67, ABCD1, FGR, PLK1, RAD54L, KIF23, MT HFD1L, PKDCC, HKDC1, XRCC2, CPS1, ATAD2, M APK15, CHTF18, PRKDC, KIF18B, POLQ, KIF21B, M YH10, MYO7B, KIF4A, NE                                                                                                                                                                                                                                                                                                                                                                                                                                                                                                                                                                                               |

|            |    |                               |          |          |          |          |    |                                                                                                                                                                                                                                                                                                                                                                                                                                                                                                                                                    |
|------------|----|-------------------------------|----------|----------|----------|----------|----|----------------------------------------------------------------------------------------------------------------------------------------------------------------------------------------------------------------------------------------------------------------------------------------------------------------------------------------------------------------------------------------------------------------------------------------------------------------------------------------------------------------------------------------------------|
| GO:0060089 | MF | molecular transducer activity | 8.94E-04 | 1.48E-02 | 1.12E-01 | 9.61E-01 | 65 | K2,SPHK1,NRK,BUB1,BUB1B,KIF14,ATP11A,KIF2C,CAD,KIF26B,UBE2C,STK31,ATP10A,PKMYT1,KIF20A,ORC1,P2RX7,ENTPD1,CDC6,TOP2A,EPHA3,EPHB1<br>EPHB2,ABCA1,IGSF6,PDGFRB,CLEC7A,F2R,F2RL2,CAMK2N1,FCER1G,FCGR1A,FCGR3A,ANTXR1,CCR1,PLAU,PLK1,PLXNA1,SELE,ITGA11,FPR1,ICAM1,CLDN4,CLDN3,STITL,LGR5,CSF3R,IL2RA,DKK2,ITGAX,ITGB8,LRP8,PXDN,PTPRO,SPHK1,MRC2,C5AR1,STRA6,NOTCH1,NOTCH3,LILRB4,LILRB3,KRT17,GRIN2D,NFAM1,EDNRA,TNFRSF11B,CCND2,PKMYT1,CCNF,GPR161,CELSR3,HMCN1,P2RX7,PLXNC1,SERPINE1,TREM2,TREM1,ROBO2,GREM1,OSMR,LY6E,CDC6,LEF1,GPR176,EPHA3,EPHB1 |
| GO:0016462 | MF | pyrophosphatase activity      | 3.72E-03 | 4.26E-02 | 3.22E-01 | 1.00E+00 | 52 | ABCA1,ATAD5,ABCA13,TRPM2,MCM2,MCM7,CHN1,F2R,TUBB3,RECQL4,CCL3,ABCD1,CCL18,IQGAP3,PLXNA1,RAD54L,KIF23,PLEKHG4,ICAM1,GINS4,XRCC2,ATAD2,CHTF18,KIF18B,POLQ,FGD6,DOCK4,KIF21B,MYH10,MYO7B,KIF4A,ARHGAP11A,GEM,RCC2,GBP5,KIF14,DNM1,KIF2C,RAB31,KIF26B,ARHGAP39,NCAPH,ECT2,RGS1,KIF20A,THY1,PLXNC1,ENTPD1,GNB4,AJUBA,TOP2A,EPHA3                                                                                                                                                                                                                        |

Biological Process(BP), Cellular Component(CC) and Molecular Functions (MF)

**Table 6** The enriched GO terms of the down regulated differentially expressed genes

| GO ID      | CATEGORY | GO Name                        | P Value  | FDR B&H  | FDR B&Y  | Bonferroni | Gene Count | Gene                                                                                                                                                                     |
|------------|----------|--------------------------------|----------|----------|----------|------------|------------|--------------------------------------------------------------------------------------------------------------------------------------------------------------------------|
| GO:0007586 | BP       | digestion                      | 8.97E-20 | 4.55E-16 | 4.14E-15 | 4.55E-16   | 30         | PGA5,PGC,HRH2,ASH2,APOA1,APOA4,AQP5,SLC26A7,MUC6,CAPN9,CHIA,GHRL,VSIG1,PBLD,SST,PTGER3,AKR1C1,AKR1C2,CAPN8,KCNQ1,PGA3,PGA4,CCKAR,CCKBR,TFF1,TFF2,SLC9A4,GUCA2B,CD36,GKN1 |
| GO:0006082 | BP       | organic acid metabolic process | 1.13E-14 | 1.91E-11 | 1.74E-10 | 5.73E-11   | 73         | HGD,ACADL,GGT6,ESRRB,CYP2S1,TSTM E1,ADH1C,CKB,ADH7,CKM,CKMT2,FBP1,HPGD,PLIN5,SMPD3,ELOVL6,ALDOB,ALDOC,ALDH6A1,ERO1B,FOLR1,HYAL1,UGT1A10                                  |

|            |    |                            |          |          |          |          |    |                                                                                                                                                                                                                                                                                                                                                                                                                                                                                                                                                                                                         |
|------------|----|----------------------------|----------|----------|----------|----------|----|---------------------------------------------------------------------------------------------------------------------------------------------------------------------------------------------------------------------------------------------------------------------------------------------------------------------------------------------------------------------------------------------------------------------------------------------------------------------------------------------------------------------------------------------------------------------------------------------------------|
|            |    |                            |          |          |          |          |    | .ASAH2,FA2H,UGT1A<br>6,LIPF,PM20D1,APOA<br>4,APOC3,SLC9A1,PTG<br>R1,PRKAA2,AKR1C3,<br>CYP4F12,CYB5A,CYP<br>2C19,GALE,CYP2C8,C<br>YP2C9,CYP2C18,CYP3<br>A4,CYP3A5,INSIG1,A<br>CSM1,GCKR,GNMT,A<br>KR1C1,AKR1C2,BHM<br>T,XYLT2,LDHD,ADH<br>FE1,SULT1B1,SULT1C<br>2,SULT2A1,MAMDC2,<br>GLUL,NQO1,ANGPTL<br>3,GPT2,SLC16A9,GPT,<br>B3GNT7,ADTRP,GST<br>A1,SLC7A8,RGN,CD3<br>6,DHRS9,ENTPD5,HA<br>S3                                                                                                                                                                                                         |
| GO:0006629 | BP | lipid metabolic<br>process | 7.00E-12 | 4.15E-09 | 3.78E-08 | 3.55E-08 | 75 | AADAC,ACADL,CYP2<br>S1,TM6SF2,KLF4,FOX<br>A2,ME1,TTR,ADH1C,<br>ADH7,TFCP2L1,PIK3C<br>2G,LIPH,HPGD,PLIN5,<br>SMPD3,ALDH1A1,EL<br>OVL6,PSAPL1,NR0B2,<br>ANG,CWH43,ASAH2,<br>GDPD3,FA2H,LIPF,PM<br>20D1,APOA1,APOA4,<br>APOBEC1,APOC3,PTG<br>R1,PRKAA2,AKR1C3,<br>PLCXD3,CYP4F12,PR<br>LR,CYB5A,ACER2,CY<br>P2C19,CYP2C8,CYP2C<br>9,CYP2C18,CYP3A4,C<br>YP3A5,INSIG1,ACSM1<br>,GATA6,GDPD2,GC,A<br>KR1C1,AKR1C2,BMP5<br>,SULT1B1,SULT2A1,P<br>TPRN2,DHCR24,AKR1<br>B10,ANGPTL3,SPTSS<br>B,RDH12,ADTRP,LEP<br>R,FAM135B,CCKBR,G<br>STA1,EEF1A2,RGN,E<br>NHO,CD36,DHRS9,AK<br>R1B15,TM7SF2,B4GA<br>LNT2,RORC |
| GO:0048878 | BP | chemical<br>homeostasis    | 5.50E-10 | 1.39E-07 | 1.27E-06 | 2.79E-06 | 66 | ERBB4,CHGA,TM6SF<br>2,FOXA1,FOXA2,FOX<br>A3,F2RL1,CKB,CCL28<br>,HPN,TMEM38A,SCN<br>N1B,SCNN1G,SMPD3,<br>HOMER2,ATP13A4,ER<br>O1B,FA2H,KLF15,SLC<br>26A9,APOA1,XK,APO<br>A4,APOC3,SCGN,AQP<br>4,MT1E,MT1F,MT1G,<br>MT1H,MT1M,SLC9A1,<br>SLC9A2,MT1X,SLC9A<br>3,SCARA5,PRKAA2,C<br>YP4F12,SLC4A4,ATP4<br>A,ATP4B,GHRL,MYO<br>C,INSIG1,ACSM1,GC<br>KR,PTGER3,AKR1C1,<br>PTPRN2,CXCL17,ANG<br>PTL3,TESC,CA2,CA4,<br>ATP13A5,FAM3B,LEP<br>R,CCKAR,CCKBR,TF<br>R2,SLC7A8,RGN,SLC9<br>A4,OXCT1,CD36,LTF                                                                                                        |



|            |    |                                           |          |          |          |          |    |                                                                                                                                                                                                                                                                                                                                                                                                 |
|------------|----|-------------------------------------------|----------|----------|----------|----------|----|-------------------------------------------------------------------------------------------------------------------------------------------------------------------------------------------------------------------------------------------------------------------------------------------------------------------------------------------------------------------------------------------------|
| GO:0055114 | BP | oxidation-reduction process               | 9.89E-10 | 2.18E-07 | 1.99E-06 | 5.01E-06 | 62 | HGD,MAOA,ACADL,ESRRB,CYP2S1,ME1,ADH1C,ADH7,FBP1,HPGD,PLIN5,PDIA2,ALDH1A1,ALDH3A1,ALDOB,ALDOC,ALDH6A1,FMO5,ERO1B,FA2H,LIPF,DUOX2,APOA1,PTGR1,DHRS7,PRKAA2,AKR7A3,AKR1C3,CYP4F12,PRDM16,CYB5A,CYP2C19,GALE,CYP2C8,CYP2C9,CYP2C18,CYP3A4,CYP3A5,ACSM1,GCKR,GNMT,AKR1C1,AKR1C2,LDHD,DUOX1,ADHFE1,DHCR24,AKR1B10,NQO1,SELENBP1,GPX3,RDH12,LEPR,GSTA1,RGBN,CD36,DHRS9,ENTPD5,AKR1B15,TM7SF2,MRAP2,HBB |
| GO:1901135 | BP | carbohydrate derivative metabolic process | 2.45E-07 | 3.45E-05 | 3.14E-04 | 1.24E-03 | 58 | ESRRB,B3GALT5,FOXO2,GCNT4,FBP1,SMPD3,ALDH1A1,ELOVL6,ALDOB,ALDOC,COL2A1,AMPD1,CWH43,HYAL1,FA2H,APOBEC1,APOC3,SLC9A1,GUCY1C,PRKAA2,FUT9,AKR1C3,B3GAT1,HS6ST3,MUC1,MUC6,ATP4B,ACER2,ST6GALNAC1,GALE,CHIA,ACSM1,FBP2,GCKR,GCNT1,GCNT2,GNMT,AKR1C1,AKR1C2,XYL2,B3GNT6,LDHD,SULT1B1,SULT1C2,SULT2A1,MAMDC2,APOBEC2,AKR1B10,MUC5B,B3GNT7,GUCA2B,ENTPD5,B4GALNT2,A4GNT,GALNT6,GALNT5,HAS3,PDZD3         |
| GO:0022610 | BP | biological adhesion                       | 8.56E-07 | 9.87E-05 | 8.99E-04 | 4.34E-03 | 63 | LGALS9C,CLDN18,COL6A5,FOXA1,KLF4,FOXA2,CCL28,FGA,FGB,IGSF9,FGG,COL4A6,COL17A1,EPB41L4B,HYAL1,ID1,APLP1,APOA1,APOA4,GATA5,AQP4,HAPLN1,ARHGDI3,SLC9A1,IGFALS,IGFBP2,CSTA,SIGLEC11,MUC1,ATP4B,PRLR,CXADR,ACER2,SOX2,LGALS9B,CDHR2,MYOC,AZGP1,NCAM1,GCNT1,GCNT2,PTGER3,CADM2,BMP5,PTPRR,PTPRZ1,ANGPTL3,TESS,UNC5D,AMTN,DPT,RAP1GAP,DSC2,ADTRP,CLDN23,HHLA2,CD36,B4GALNT2,CNTN3,REG3A,LTF,HBB,CDH2   |
| GO:0009719 | BP | response to                               | 2.12E-06 | 2.11E-04 | 1.92E-03 | 1.08E-02 | 71 | ERBB4,ESRRB,ESRRG                                                                                                                                                                                                                                                                                                                                                                               |

| GO ID      | Category | Term                                   | 4.23E-06 | 3.52E-04 | 3.20E-03 | 2.15E-02 | 70 | Genes                                                                                                                                                                                                                                                                                                                                                                                                                     |
|------------|----------|----------------------------------------|----------|----------|----------|----------|----|---------------------------------------------------------------------------------------------------------------------------------------------------------------------------------------------------------------------------------------------------------------------------------------------------------------------------------------------------------------------------------------------------------------------------|
| GO:0046903 | BP       | secretion                              | 4.23E-06 | 3.52E-04 | 3.20E-03 | 2.15E-02 | 70 | ,FOXA1,KLF4,ME1,KLF2,SCGB2A1,HPGD,HPN,TMEM38A,FGF,HHRH2,SMPD3,ALDH3A1,ALDOB,NR0B2,COL2A1,COL4A6,HTR1E,ANG,FOLR1,HYAL1,SH3GL2,PAQR8,ID1,KLFI5,SOSTDC1,APLP1,APOA1,APOBEC1,GATA5,APOC3,SLC5A5,SLC9A1,IGFBP2,PDGFD,PRKAA2,AKR1C3,PRDM16,PRLR,GABRB3,GHRL,GATA6,PBLD,GCNT1,GCNT2,SST,STR1,AKR1C1,AKR1C2,BMP5,DHCR24,NQO1,ANGPTL3,KCNQ1,CA2,CA9,RAP1GAP,VS TM2A,ADTRP,LEPR,CKAR,TFF1,OXCT1,ENHO,CD36,REG3A,RORC,CLEC3B,TMEM100 |
| GO:0046903 | BP       | secretion                              | 4.23E-06 | 3.52E-04 | 3.20E-03 | 2.15E-02 | 70 | LGALS9C,ERBB4,CHGA,FOXA2,F2RL1,TTTR,F13A1,PLAC8,S100P,SERPINA4,FGA,FGF,HRH2,KRT20,SMPD3,FGG,ALDOC,NR0B2,METTL7A,ANG,SLC25A4,MYRIP,APOA1,SLC1A2,AQP5,STX19,SLC26A7,SCG3,RIMS4,SLPI,CYSTMI,RIMS1,SCIN,PRLR,CHIA,GHRL,LGALS9B,SYTL2,NCAM1,PTGER3,PTPRN2,IL1R2,GLUL,KCNQ1,RAB27A,RAB27B,CA2,CA9,TCN1,FAM3B,ADTRP,LEPR,CCKAR,CCKBR,TFF2,TFR2,SYT16,ORM1,ORM2,SLC9A4,OXCT1,ENHO,GUCA2B,SYTL5,CD36,RORC,CLEC3B,LTF,HHBB,RAB37    |
| GO:1901700 | BP       | response to oxygen-containing compound | 4.56E-06 | 3.73E-04 | 3.40E-03 | 2.31E-02 | 70 | CLDN18,FOXA1,KLF4,FOXA2,ME1,KLF2,ADH7,HPGD,HRH2,SMPD3,ALDH3A1,ALDOB,HOMER2,NR0B2,COL4A6,HTR1E,FOLR1,HYAL1,ID1,KLFI5,DUOX2,APLP1,APOA4,APOBEC1,APOC3,AQP4,SLC1A2,SLC5A5,SLC9A1,IGFBP2,PDGFD,PRKAA2,SLPI,AKR1C3,ATP4B,PRLR,ACER2,SOX2,GHRL,INSIG1,NCAM1,GCKR,GCNT1,SSAT,SSTR1,PTGER3,AKR1C1,AKR1C2,DUOX1,PTPRN2,AKR1B10,GLUL,NQO1,KCNQ1,TECC,CA2,CA9,GPX3,RDH12,LEPR,TFF1,RGN,                                              |

|            |    |                                                   |          |          |          |          |    |                                                                                                                                                                                                                                                                                                                                                                                                                                                                                                                              |
|------------|----|---------------------------------------------------|----------|----------|----------|----------|----|------------------------------------------------------------------------------------------------------------------------------------------------------------------------------------------------------------------------------------------------------------------------------------------------------------------------------------------------------------------------------------------------------------------------------------------------------------------------------------------------------------------------------|
| GO:0140352 | BP | export from cell                                  | 3.05E-05 | 1.64E-03 | 1.50E-02 | 1.55E-01 | 64 | OXCT1,ENHO,CD36,P<br>ALM3,REG3A,RORC,<br>LTF,HBB<br>LGALS9C,CHGA,FOX<br>A2,F2RL1,TTR,F13A1,<br>PLAC8,S100P,SERPIN<br>A4,FGA,FGB,KRT20,S<br>MPD3,FGG,ALDOC,N<br>ROB2,METTL7A,ANG,<br>SLC25A4,MYRIP,APO<br>A1,SLC1A2,STX19,SL<br>C9A1,SCG3,RIMS4,SL<br>PI,CYSTM1,RIMS1,SC<br>IN,ATP4A,ATP4B,CHI<br>A,GHRL,LGALS9B,SY<br>TL2,NCAM1,PTGER3,<br>PTRN2,IL1R2,GLUL,<br>KCNQ1,RAB27A,RAB<br>27B,KCNE2,TCN1,FA<br>M3B,ADTRP,LEPR,CC<br>KAR,CCKBR,TFR2,SY<br>T16,ORM1,ORM2,OX<br>CT1,ENHO,SYTL5,CD<br>36,RORC,CLEC3B,LTF<br>,HBB,RAB37 |
| GO:0071495 | BP | cellular<br>response to<br>endogenous<br>stimulus | 8.74E-05 | 3.59E-03 | 3.27E-02 | 4.43E-01 | 57 | ERBB4,ESRRB,ESRRG<br>,FOXA1,KLF4,KLF2,S<br>CGB2A1,HPGD,TMEM<br>38A,FGB,HRH2,SMPD<br>3,NR0B2,COL2A1,CO<br>L4A6,HTR1E,FOLR1,H<br>YAL1,SH3GL2,PAQR8<br>,ID1,KLF15,SOSTDC1,<br>APLP1,APOA1,APOBE<br>C1,GATA5,SLC5A5,SL<br>C9A1,IGFBP2,PDGFD,<br>PRKAA2,AKR1C3,PR<br>DM16,PRLR,GABRB3,<br>GHRL,GATA6,PBLD,<br>GCNT2,SST,SSTR1,A<br>KR1C1,AKR1C2,BMP5<br>,KCNQ1,CA2,RAP1GA<br>P,VSTM2A,ADTRP,LE<br>PR,CCKAR,ENHO,CD<br>36,RORC,CLEC3B,TM<br>EM100                                                                                  |
| GO:0045177 | CC | apical part of<br>cell                            | 4.68E-09 | 2.26E-06 | 1.53E-05 | 2.26E-06 | 33 | MAL,PROM2,HPN,UP<br>K1B,SCNN1B,SCNN1<br>G,HOMER2,DUOXA2,<br>PAPPA2,EPB41L4B,FO<br>LR1,MYRIP,SLC26A9,<br>DUOX2,AQP5,SLC9A1<br>,SLC9A3,IGFBP2,PRK<br>AA2,CYP4F12,MUC1,<br>ATP4A,CDHR2,DUOX<br>1,RAB27A,RAB27B,C<br>A2,CA4,AQP10,SLC9A<br>4,CD36,PDZD3,CDH2<br>COL6A5,F13A1,FGA,F<br>GB,FGG,COL2A1,COL<br>4A6,ANG,COL17A1,A<br>PLP1,APOA1,APOA4,<br>APOC3,HAPLN1,IGFA<br>LS,SLPI,MUC1,MUC6,<br>MYOC,AZGP1,NCAM<br>1,PTPRZ1,MAMDC2,S<br>EMA3B,ADAMTS15,A<br>MTN,DPT,ADAMTSL1<br>,ENAM,ORM1,ORM2,<br>CCBE1,CLEC3B,CDH2            |
| GO:0031012 | CC | extracellular<br>matrix                           | 1.96E-07 | 2.37E-05 | 1.60E-04 | 9.49E-05 | 35 |                                                                                                                                                                                                                                                                                                                                                                                                                                                                                                                              |

|            |    |                                        |          |          |          |          |    |                                                                                                                                                                                                                                                                                                                                                                                                                                                                      |
|------------|----|----------------------------------------|----------|----------|----------|----------|----|----------------------------------------------------------------------------------------------------------------------------------------------------------------------------------------------------------------------------------------------------------------------------------------------------------------------------------------------------------------------------------------------------------------------------------------------------------------------|
| GO:0031226 | CC | intrinsic component of plasma membrane | 3.99E-06 | 3.21E-04 | 2.17E-03 | 1.93E-03 | 65 | ,SERPINA5<br>ERBB4,VSIG2,F2RL1,CLCNKA,PROM2,HPN,UPK1B,KIAA1324,SCNN1B,SCNN1G,HRH2,FXD3,SHISA6,HTR1E,COL17A1,SLC25A4,FOLR1,ASAH2,SLC26A9,DUOX2,AQP4,SLC1A2,AQP5,SLC9A1,SLC15A1,SLC26A7,SCARA5,SLC4A4,MUC1,SLC2A12,ATP4A,ATP4B,CXADR,GABRB3,PRSS8,CDHR2,NCAM1,GPRC5C,SSTR1,PTGER3,DUOX1,PTPRN2,PTPRZ1,KCNJ15,KCNJ16,SEMA3B,KCNQ1,ENPP5,C6,CA4,KCNE2,AQP10,SLC16A9,GRIA4,LEPR,PRIMA1,CCKAR,TSPAN1,TFR2,SLC7A8,LIFR,CD36,SLC28A2,TM7SF2,TMPRSS2,HAS3,CDH2,SLC16A7,PTGDR2 |
| GO:0009986 | CC | cell surface                           | 2.47E-04 | 9.93E-03 | 6.71E-02 | 1.19E-01 | 41 | BTNL8,PROM2,HPN,SCNN1B,FGA,SCNN1G,FGF,FGG,FOLR1,SLC26A9,DUOX2,APOA1,APOA4,AQP4,SLC1A2,SLC9A1,SLC9A3,SCUBE2,SCARA5,SIGLEC11,MUC1,PRLR,AZGP1,NCAM1,PTGER3,DUOX1,ANGPTL3,ADAMTS15,UNC5D,CA4,KCNE2,ADTRP,LEPR,TFR2,LIFR,HHLA2,CD36,RORC,LTF,CDH2,SER                                                                                                                                                                                                                     |
| GO:0099503 | CC | secretory vesicle                      | 9.58E-04 | 2.01E-02 | 1.36E-01 | 4.63E-01 | 40 | PINA5<br>CHGA,CHGB,TTR,F13A1,PLAC8,S100P,SERPINA4,FGA,FGF,ALDOC,METTL7A,SH3GL2,MYRIP,APOA1,STX19,SCG3,SLPI,CYSTM1,CXADR,GHRL,KIF1A,SYTL2,PTPRN2,KCNQ1,RAB27A,RAB27B,CA4,KLK11,TCN1,ORM1,ORM2,SYTL5,CD36,CLEC3B,LTF,GN1,HBB,RAB37,SER                                                                                                                                                                                                                                 |
| GO:0005789 | CC | endoplasmic reticulum membrane         | 1.17E-02 | 1.30E-01 | 8.77E-01 | 1.00E+00 | 36 | PINA5<br>AADAC,TMED6,ANO5,CYP2S1,TM6SF2,HPN,TMEM38A,ELOVL6,ALDOB,FXD3,DUOXA2,ATP13A4,FMO5,ERO1B,FOLR1,UGT1A10,GDPD3,FA2H,UGT1A6,SLC9A1,B3GAT1,CYP4F12,CYB5A,CYP2C19,CYP2C8,CYP2C9,CYP2C18,CYP3A4,CYP3A5,INSIG1,DHCR24,SPTSSB,RDH12,DHRS9,TM7SF2,MRAP2                                                                                                                                                                                                                |

|            |    |                   |          |          |          |          |    |                                                                                                                                                                                                                                                                                                                              |
|------------|----|-------------------|----------|----------|----------|----------|----|------------------------------------------------------------------------------------------------------------------------------------------------------------------------------------------------------------------------------------------------------------------------------------------------------------------------------|
| GO:0005794 | CC | Golgi apparatus   | 2.04E-02 |          |          | 1.00E+00 | 49 | MAL,TMED6,B3GALT5,GCNT4,F2RL1,PIK3C2G,KIAA1324,SMPD3,FOLR1,ASAH2,SH3GL2,PAQR8,ID1,CXCL14,APLP1,PDGFD,PRKAA2,FUT9,B3GAT1,MUC1,MUC6,ACER2,ST6GALNAC1,MYOC,INSIG1,NCAM1,GCNT1,GCNT2,CAPN8,XYL2,2,B3GNT6,DEFB1,DHCR24,ANGPTL3,B4GALNT3,RAB27A,RAB27B,CA4,KLK11,KCNE2,RAP1GAP,GKN2,MUC5B,B3GNT7,CD36,B4GALNT2,A4GNT,GALNT6,GALNT5 |
| GO:0030054 | CC | cell junction     | 2.44E-01 | 5.70E-01 | 1.00E+00 | 1.00E+00 | 34 | CLDN18,FOXA2,HPN,IGSF9,HOMER2,SHISA6,COL17A1,EPB41L4B,DUOX2,MYZAP,AQP4,SLC9A1,RIMS4,ANO7,RIMS1,SCIN,CXADR,GABRB3,CDHR2,NCAM1,FBP2,CADM2,PTPRN2,PTPRR,AMTN,DSC2,GRIA4,CLDN23,PRIMA1,TSPAN1,CGNL1,PDZD3,CDH2,C4orf19                                                                                                           |
| GO:0045202 | CC | synapse           | 2.46E-01 | 5.70E-01 | 1.00E+00 | 1.00E+00 | 37 | ERBB4,FGA,FGB,IGSF9,FGG,ALDOC,HOMER2,SHISA6,SH3GL2,MYRIP,APOA4,BCAS1,SCGN,SLC1A2,HAPLN1,STX19,RIMS4,PLCXD3,RIMS1,CXADR,GABRB3,LYPD6B,GHRL,KIF1A,NCAM1,CADM2,ITPKA,PTPRN2,PTPRZ1,GLUL,RAB27B,GRIA4,PRIMA1,CCKAR,EF1A2,CDH2,SLC16A7                                                                                            |
| GO:0043005 | CC | neuron projection | 2.63E-01 | 5.93E-01 | 1.00E+00 | 1.00E+00 | 40 | CKB,HRH2,IGSF9,ALDOC,MLPH,HOMER2,SHISA6,HTR1E,ANG,SH3GL2,MYRIP,IRX3,SCGN,SLC1A2,GUCA1C,PRKAA2,CXADR,GABRB3,GHRL,KIF1A,MYOC,DNER,NCAM1,GC,PTGER3,CADM2,ITPKA,PTPRN2,PTPRZ1,GLUL,NQO1,RAB27A,RAB27B,CA2,RAP1GAP,GRIA4,CCKAR,GUCA2B,CDH2,SLC16A7                                                                                |
| GO:0098805 | CC | whole membrane    | 5.91E-01 | 8.62E-01 | 1.00E+00 | 1.00E+00 | 38 | ERBB4,MAL,MAOA,FNDC5,CHGA,PROM2,KIAA1324,SLC25A4,FOLR1,ASAH2,SH3GL2,MYRIP,SCGN,AQP4,SLC9A1,SLC26A7,SCG3,CYSTM1,CXADR,CYB5A,PRSS8,MYOC,PTPRN2,PXMP2,KCNQ1,                                                                                                                                                                    |

|            |    |                                                               |          |          |          |          |    |                                                                                                                                                                                                                                                                                                                                                                                                                                                                                                                                                   |
|------------|----|---------------------------------------------------------------|----------|----------|----------|----------|----|---------------------------------------------------------------------------------------------------------------------------------------------------------------------------------------------------------------------------------------------------------------------------------------------------------------------------------------------------------------------------------------------------------------------------------------------------------------------------------------------------------------------------------------------------|
| GO:0016491 | MF | oxidoreductase activity                                       | 1.21E-09 | 1.33E-06 | 1.01E-05 | 1.33E-06 | 54 | RAB27A,RAB27B,CA4,REP15,GRIA4,ADTRP,TSPAN1,EEF1A2,PLLP,CD36,RAB37,CDH2,SERPINA5                                                                                                                                                                                                                                                                                                                                                                                                                                                                   |
| GO:0046914 | MF | transition metal ion binding                                  | 2.54E-04 | 6.18E-03 | 4.68E-02 | 2.78E-01 | 44 | HGD,MAOA,ACADL,ESRRB,CYP2S1,ME1,ADH1C,ADH7,FBP1,HPGD,PDIA2,ALDH1A1,ALDH3A1,ALDOB,ALDOC,ALDH6A1,FMO5,ERO1B,FA2H,LIPF,UOX2,PTGR1,DHRS7,PRKAA2,AKR7A3,AKR1C3,CYP4F12,CYB5A,CYP2C19,GALE,CYP2C8,CYP2C9,CYP2C18,CYP3A4,CYP3A5,GCKR,AKR1C1,AKR1C2,LDHD,DUOX1,ADHFE1,DHCR24,AKR1B10,NQO1,SELENBP1,GPX3,RDH12,GSTA1,RGN,DHRS9,ENTPD5,AKR1B15,TM7SF2,HBB                                                                                                                                                                                                   |
| GO:0015318 | MF | inorganic molecular entity transmembrane transporter activity | 4.77E-04 | 9.94E-03 | 7.53E-02 | 5.23E-01 | 42 | ESRRB,ESRRG,CYP2S1,KLF4,ME1,ADH1C,ADH7,S100P,PAPPA2,ANG,ASAH2,FA2H,MYRIP,APLP1,CPA2,APOA4,APOBEC1,GATA5,MT1E,MT1F,MT1G,MT1H,MT1M,MT1X,CYP4F12,CYP2C19,CYP2C8,CYP2C9,CYP2C18,CYP3A4,CYP3A5,GATA6,ZNF385B,BHMT,XYL2,GLUL,ADAMTS15,TRIM50,CA2,CA4,CA9,RGN,RORC,LTFANO5,CLCNKA,HPN,TMEM38A,SCNN1B,SCNN1G,FXFD3,SHISA6,ATP13A4,SLC26A9,AQP4,SLC1A2,AQP5,SLC5A5,SLC9A1,SLC9A2,SLC9A3,SLC15A1,SLC26A7,ANO7,SLC4A4,SLC2A12,ATP4A,ATP4B,CYB5A,GABRB3,PRSS8,KCNJ15,KCNJ16,KCNQ1,TESC,KCNE2,AQP10,SLC16A9,GRIA4,CLIC6,SGK2,SLC7A8,RGN,SLC9A4,SLC28A2,SLC16A7 |
| GO:0042802 | MF | identical protein binding                                     | 3.57E-03 | 3.66E-02 | 2.77E-01 | 1.00E+00 | 63 | CLDN18,HGD,ERBB4,TTR,C16orf89,ADH7,S100P,FBP1,CLCNKA,HPGD,PLIN5,FGG,ALDOB,HOMER2,NR0B2,COL2A1,ANG,UGT1A10,UGT1A6,SH3GL2,ID1,APLP1,APOA1,APOA4,BCAS1,AQP4,AQP5,SCUBE2,AKR7A3,RASEF,DMRTA1,SLC4A4,CTSE,PRLR,CXADR,GABRB3,GALE,KIF1A,NCAM1,PBLD,FBP2,G                                                                                                                                                                                                                                                                                               |



|            |    |                                          |          |          |          |          |    |                                                                                                                                                                                                                                                                                                                                                                                                                                                                                                                           |
|------------|----|------------------------------------------|----------|----------|----------|----------|----|---------------------------------------------------------------------------------------------------------------------------------------------------------------------------------------------------------------------------------------------------------------------------------------------------------------------------------------------------------------------------------------------------------------------------------------------------------------------------------------------------------------------------|
| GO:0098772 | MF | molecular function regulator             | 7.21E-03 | 5.85E-02 | 4.43E-01 | 1.00E+00 | 59 | NMT,DEFB1,APOBEC2,GLUL,NQO1,KCNQ1,TESE,TRIM50,KCNE2,RAP1GAP,VSTM2A,GRIA4,CLIC6,CLDN23,LEPR,SYT16,OXCT1,REG3A,HAS3,MRAP2,CDH2,TPD52L1<br>MAL,FNDC5,CHGB,KLF4,TTR,MTRNR2L2,ADH7,SERPINA4,CCL28,ALDH1A1,ARHGEF37,FXVD3,CXCL14,APOA1,APOA4,APOBEC1,DUSP19,APOC3,ARHGDI,GUCA1C,RANBP3L,SLC15A1,PDGFR,SLPI,PKIB,CSTA,RIMS1,ATP4B,PRLR,SERPINB7,LYPD6B,PRS8,GHRL,NRG4,GPRC5C,EPSS8L1,GCKR,SST,SPINK13,MTRNR2L8,BMP5,CXCL17,SEMA3B,ANGPTL3,TESE,KCNE2,RAP1GAP,FAM3B,CCKBR,TFF1,SGK2,RGN,ENHO,GUCA2B,LTF,GKN1,MRAP2,PDZD3,SERPINA5 |
| GO:0005102 | MF | signaling receptor binding               | 9.67E-03 | 6.92E-02 | 5.25E-01 | 1.00E+00 | 56 | ERBB4,BTNL8,FNDC5,CHGB,F2RL1,TTR,MTRNR2L2,ADH7,S100P,CCL28,EDARADD,FGA,FGB,FGG,HOMER2,NROB2,SHISA6,COL2A1,ANG,CXCL14,APLP1,APOA1,APOC3,IGFALS,IGFBP2,PDGFR,ASL,CXADR,GHRL,NRG4,MYOC,SYTL2,DNER,GPRC5C,EPSS8L1,SST,MTRNR2L8,DEFB1,BMP5,PTPRZ1,CXCL17,SEMA3B,ANGPTL3,PSCA,FAM3B,CLIC6,CCKBR,TFF1,TFF2,EF1A2,LIFR,HHLA2,ENHO,CD36,GKN1,MRAP2                                                                                                                                                                                 |
| GO:0008324 | MF | cationtransmembrane transporter activity | 2.05E-02 | 1.08E-01 | 8.17E-01 | 1.00E+00 | 30 | HPN,TMEM38A,SCNN1B,SCNN1G,FXVD3,SHISA6,ATP13A4,SLC1A2,SLC5A5,SLC9A1,SLC9A2,SLC9A3,SLC15A1,SLC4A4,SLC2A12,ATP4A,ATP4B,CYB5A,PRSS8,KCNJ15,KCNJ16,KCNQ1,TESE,KCNE2,GRIA4,SGK2,SLC7A8,RGN,SLC9A4,SLC28A2                                                                                                                                                                                                                                                                                                                      |
| GO:0030234 | MF | enzyme regulator activity                | 7.96E-02 | 2.26E-01 | 1.00E+00 | 1.00E+00 | 32 | MAL,KLF4,SERPINA4,ALDH1A1,APOA1,APOA4,APOBEC1,DUSP19,APOC3,ARHGDI,GUCA1C,RANBP3L,SLPI,PKIB,CSTA,RIMS1,ATP4B,PRLR,SERPINB7,GHRL,GPRC5C,GCK                                                                                                                                                                                                                                                                                                                                                                                 |

|            |    |                    |          |          |          |          |    |                                                                                                                                                                                                                                                                                   |
|------------|----|--------------------|----------|----------|----------|----------|----|-----------------------------------------------------------------------------------------------------------------------------------------------------------------------------------------------------------------------------------------------------------------------------------|
| GO:0008233 | MF | peptidase activity | 2.54E-01 | 4.22E-01 | 1.00E+00 | 1.00E+00 | 33 | R,SPINK13,ANGPTL3,TESC,RAP1GAP,CCKBR,RGN,GUCA2B,LTF,PDZD3,SERPINA5,MAL,GGT6,KLF4,PGA5,PGC,CAPN13,SERPINA4,HPN,KIAA1324,PAPPA2,PM20D1,CPA2,SLPI,CSTA,CTSE,ACER2,CAPN9,SOX2,SERPINB7,PRSS8,ADAM28,SPINK13,CAPN8,RHBDL2,DHCR24,ADAMTS15,PGA3,CLK11,PGA4,ADAMTSL1,TMPRS2,LTF,SERPINA5 |
| GO:0016301 | MF | kinase activity    | 5.59E-01 | 6.99E-01 | 1.00E+00 | 1.00E+00 | 36 | ERBB4,ESRRB,STYK1,KLF4,FOXA2,CKB,CKM,CKMT2,FBP1,PIK3C2G,ALDH1A1,ALDOB,ALDOC,ANG,SOSTDC1,DUSP19,PDGFD,PRKAA2,PKIB,PRLR,GALE,GHRL,GPRC5C,GCKR,ITPKA,CXCL17,RPS6KA6,TESC,RIPK4,CCKBR,EEF1A2,SGK2,RGN,ENTPD5,LTF,TPD52L1                                                              |

Biological Process(BP), Cellular Component(CC) and Molecular Functions (MF)

**Table 7** Topology table for up and down regulated genes

| Regulation | Node   | Degree | Betweenness | Stress   | Closeness | Clustering Coefficient |
|------------|--------|--------|-------------|----------|-----------|------------------------|
| Down       | SOX2   | 361    | 0.130645    | 91698482 | 0.314504  | 3.13E-05               |
| Down       | RIPK4  | 336    | 0.128603    | 98813078 | 0.314446  | 0                      |
| Down       | FOXA1  | 290    | 0.103625    | 62359854 | 0.309195  | 3.87E-04               |
| Down       | EEF1A2 | 192    | 0.092037    | 39507690 | 0.326061  | 7.09E-04               |
| Down       | ANG    | 126    | 0.033985    | 31690134 | 0.29174   | 0                      |
| Down       | FGB    | 119    | 0.043651    | 12625862 | 0.307262  | 0.004558               |
| Down       | PTGER3 | 113    | 0.038772    | 17588946 | 0.28297   | 3.16E-04               |
| Down       | CKB    | 111    | 0.036348    | 17987186 | 0.29959   | 0.002502               |
| Down       | FOXQ1  | 108    | 0.024413    | 25595054 | 0.265424  | 0                      |
| Down       | ERBB4  | 101    | 0.039648    | 13011632 | 0.303684  | 0.00268                |
| Down       | PRKAA2 | 100    | 0.028743    | 15759608 | 0.279198  | 0                      |
| Down       | APOA1  | 100    | 0.036853    | 10368028 | 0.293786  | 0.00451                |
| Down       | ESRRB  | 98     | 0.036893    | 21650562 | 0.308952  | 0.001052               |
| Down       | OXCT1  | 97     | 0.02688     | 16657230 | 0.275526  | 0                      |
| Down       | ATP4A  | 92     | 0.038284    | 7433528  | 0.297688  | 2.50E-04               |
| Down       | F2RL1  | 90     | 0.02916     | 16825260 | 0.263862  | 0                      |

---

|      |          |    |          |          |          |          |
|------|----------|----|----------|----------|----------|----------|
| Down | EYA2     | 88 | 0.023357 | 20081684 | 0.264175 | 0        |
| Down | CDH2     | 83 | 0.025141 | 12416288 | 0.280608 | 0.001469 |
| Down | SH3GL2   | 81 | 0.028376 | 10624252 | 0.281334 | 3.25E-04 |
| Down | DUSP19   | 78 | 0.022667 | 8084684  | 0.289509 | 0.001053 |
| Down | FAM189A2 | 78 | 0.023811 | 11453482 | 0.276839 | 9.99E-04 |
| Down | ALDOC    | 75 | 0.024085 | 9254824  | 0.292324 | 0.004685 |
| Down | SLC25A4  | 74 | 0.020138 | 14876712 | 0.282704 | 0        |
| Down | HBB      | 72 | 0.024297 | 9837400  | 0.292358 | 0        |
| Down | SELENBP1 | 69 | 0.020559 | 16033854 | 0.263576 | 0        |
| Down | TTR      | 65 | 0.019611 | 8877534  | 0.281971 | 0.004608 |
| Down | NR0B2    | 65 | 0.018911 | 9601392  | 0.285754 | 4.81E-04 |
| Down | SLC15A1  | 65 | 0.022335 | 9413034  | 0.259481 | 0        |
| Down | MRAP2    | 64 | 0.018209 | 14317820 | 0.246694 | 0        |
| Down | APLP1    | 61 | 0.016887 | 7157580  | 0.275734 | 5.84E-04 |
| Down | MIA2     | 61 | 0.023593 | 3857116  | 0.292911 | 0.003507 |
| Down | MUC1     | 59 | 0.01901  | 8685324  | 0.297272 | 0.004386 |
| Down | TMEM171  | 57 | 0.015929 | 7178790  | 0.265162 | 0        |
| Down | VSIG1    | 57 | 0.015506 | 9968024  | 0.251724 | 0        |
| Down | SLC2A12  | 56 | 0.014848 | 11274816 | 0.245344 | 0        |
| Down | KIF1A    | 55 | 0.014262 | 10095312 | 0.273082 | 0        |
| Down | LIPH     | 54 | 0.014461 | 5415600  | 0.258432 | 0        |
| Down | FOXA3    | 53 | 0.011677 | 3197724  | 0.277576 | 0.007059 |
| Down | FBP1     | 52 | 0.011778 | 5755732  | 0.259718 | 0.007347 |
| Down | ID1      | 51 | 0.014356 | 8073662  | 0.260049 | 0        |
| Down | GLUL     | 51 | 0.014074 | 7290628  | 0.273901 | 0        |
| Down | LTF      | 51 | 0.015012 | 8074792  | 0.27279  | 0.001569 |
| Down | SUSD4    | 50 | 0.014117 | 8153740  | 0.252171 | 0        |
| Down | MYOC     | 49 | 0.012703 | 5520884  | 0.273784 | 0        |
| Down | COL2A1   | 48 | 0.014506 | 2615324  | 0.251625 | 0        |
| Down | CSTA     | 47 | 0.009908 | 5708660  | 0.266226 | 0        |
| Down | PTPRR    | 46 | 0.012338 | 3050164  | 0.277425 | 0.008457 |
| Down | ESRRG    | 46 | 0.01155  | 4874608  | 0.278438 | 0.001057 |
| Down | SLC9A1   | 45 | 0.021666 | 3586826  | 0.290993 | 0.008081 |
| Down | RORC     | 45 | 0.010968 | 7194834  | 0.26283  | 0        |
| Down | FRMD1    | 45 | 0.01312  | 1673830  | 0.264627 | 0.005051 |
| Down | NCAM1    | 44 | 0.011569 | 4653244  | 0.264476 | 0        |
| Down | DHRS7    | 43 | 0.013463 | 2866004  | 0.265479 | 0.001107 |
| Down | IL1R2    | 42 | 0.011437 | 5905866  | 0.234503 | 0        |
| Down | CHGB     | 42 | 0.010047 | 5822946  | 0.266963 | 0        |
| Down | BTNL8    | 42 | 0.011912 | 2086382  | 0.241256 | 0        |
| Down | FBXL13   | 42 | 0.012583 | 5749328  | 0.240111 | 0        |
| Down | FGA      | 41 | 0.010321 | 3281616  | 0.289247 | 0.062078 |
| Down | SERPINA5 | 41 | 0.012219 | 1908132  | 0.278756 | 0.008097 |

---

---

|      |         |    |          |         |          |          |
|------|---------|----|----------|---------|----------|----------|
| Down | LDHD    | 40 | 0.011361 | 9207334 | 0.235747 | 0        |
| Down | FGG     | 38 | 0.007185 | 2451080 | 0.281195 | 0.049206 |
| Down | RPS6KA6 | 37 | 0.01036  | 3621900 | 0.266684 | 0.004505 |
| Down | CYP2S1  | 37 | 0.009679 | 1915748 | 0.257936 | 0        |
| Down | KLF4    | 36 | 0.008725 | 6243510 | 0.274829 | 0        |
| Down | CA9     | 36 | 0.00838  | 3853714 | 0.278574 | 0        |
| Down | DHCR24  | 36 | 0.006868 | 4428340 | 0.272965 | 0        |
| Down | GALE    | 35 | 0.008601 | 4052878 | 0.272805 | 0        |
| Down | GPRC5C  | 35 | 0.012273 | 2377340 | 0.271515 | 0.003361 |
| Down | NQO1    | 34 | 0.008383 | 5150060 | 0.274136 | 0        |
| Down | EPN3    | 34 | 0.010642 | 6541196 | 0.240269 | 0        |
| Down | TMED6   | 34 | 0.008373 | 4030958 | 0.222818 | 0        |
| Down | RAB27A  | 33 | 0.0091   | 2404172 | 0.26859  | 0.007576 |
| Down | KRT20   | 33 | 0.007564 | 4522038 | 0.244323 | 0        |
| Down | ALDOB   | 33 | 0.007577 | 5415906 | 0.25628  | 0        |
| Down | AZGP1   | 33 | 0.007325 | 4722950 | 0.260102 | 0        |
| Down | CYB5A   | 32 | 0.014497 | 2040568 | 0.281009 | 0.002016 |
| Down | PTPRN2  | 32 | 0.006444 | 5188802 | 0.24512  | 0        |
| Down | ME1     | 32 | 0.007918 | 3585304 | 0.249439 | 0        |
| Down | LEPR    | 31 | 0.008148 | 2585854 | 0.250184 | 0        |
| Down | S100P   | 31 | 0.00819  | 3141854 | 0.261794 | 0        |
| Down | MAP7D2  | 31 | 0.006379 | 3776744 | 0.240393 | 0        |
| Down | RIMS1   | 29 | 0.006836 | 2005214 | 0.262183 | 0.004926 |
| Down | CD36    | 29 | 0.006605 | 3244170 | 0.25791  | 0        |
| Down | VSIG2   | 29 | 0.005085 | 4523118 | 0.229594 | 0        |
| Down | CKM     | 28 | 0.006486 | 1114366 | 0.26363  | 0.015385 |
| Down | PTPRZ1  | 27 | 0.004562 | 2671328 | 0.243834 | 0        |
| Down | PDIA2   | 27 | 0.011946 | 3842958 | 0.264791 | 0        |
| Down | UGT1A10 | 27 | 0.00529  | 2201280 | 0.236884 | 0.02     |
| Down | CMBL    | 27 | 0.005343 | 4698256 | 0.254001 | 0        |
| Down | LGALS9C | 27 | 0.006007 | 2789528 | 0.231267 | 0        |
| Down | KLK11   | 27 | 0.005922 | 3556426 | 0.237026 | 0        |
| Down | TFF1    | 26 | 0.00922  | 4457048 | 0.252932 | 0        |
| Down | INSIG1  | 26 | 0.005325 | 1743502 | 0.245875 | 0        |
| Down | RDH12   | 26 | 0.005489 | 2827404 | 0.239964 | 0        |
| Down | GALNT6  | 26 | 0.009106 | 2128734 | 0.260779 | 0        |
| Down | TPD52L1 | 25 | 0.004331 | 1988644 | 0.25113  | 0        |
| Down | GC      | 25 | 0.00488  | 2756190 | 0.254786 | 0        |
| Down | FOXA2   | 25 | 0.00442  | 692924  | 0.26162  | 0.027668 |
| Down | RAP1GAP | 25 | 0.005317 | 2730984 | 0.248493 | 0        |
| Down | XYLT2   | 25 | 0.005125 | 3604190 | 0.230953 | 0        |
| Down | PRLR    | 24 | 0.004513 | 2639920 | 0.241758 | 0        |
| Down | SCNN1B  | 24 | 0.003266 | 1693310 | 0.233134 | 0.051948 |

---

---

|      |          |    |          |         |          |          |
|------|----------|----|----------|---------|----------|----------|
| Down | GNMT     | 24 | 0.003761 | 2292130 | 0.242538 | 0        |
| Down | CA2      | 23 | 0.005398 | 1512836 | 0.267312 | 0        |
| Down | CCKBR    | 23 | 0.004282 | 3289826 | 0.231162 | 0.009524 |
| Down | DSC2     | 23 | 0.002627 | 1332696 | 0.243057 | 0        |
| Down | SMPD3    | 23 | 0.00407  | 1526270 | 0.243462 | 0        |
| Down | SOWAHA   | 23 | 0.005986 | 3656274 | 0.222304 | 0        |
| Down | FBP2     | 22 | 0.00357  | 1236294 | 0.256075 | 0.047368 |
| Down | SCGN     | 22 | 0.005448 | 2292384 | 0.224363 | 0        |
| Down | CXADR    | 22 | 0.004966 | 1542936 | 0.256602 | 0        |
| Down | SCGB2A1  | 22 | 0.00411  | 1974286 | 0.247626 | 0        |
| Down | ALDH6A1  | 22 | 0.005212 | 3402338 | 0.242492 | 0        |
| Down | PDGFD    | 22 | 0.004274 | 2794740 | 0.226934 | 0        |
| Down | LIFR     | 21 | 0.004499 | 3194270 | 0.242423 | 0        |
| Down | KCNQ1    | 21 | 0.004852 | 1329562 | 0.26667  | 0.005848 |
| Down | PXMP2    | 21 | 0.009681 | 2045510 | 0.253585 | 0        |
| Down | SCIN     | 21 | 0.004409 | 3432750 | 0.257481 | 0        |
| Down | ALDH3A1  | 21 | 0.006292 | 975432  | 0.247662 | 0.011696 |
| Down | STX19    | 20 | 0.005007 | 1935164 | 0.20909  | 0        |
| Down | TCEAL2   | 20 | 0.003844 | 2368446 | 0.256576 | 0        |
| Down | A4GNT    | 20 | 0.004387 | 1662140 | 0.225542 | 0        |
| Down | CHIA     | 20 | 0.005062 | 3754078 | 0.241449 | 0        |
| Down | GCNT1    | 20 | 0.004201 | 1845148 | 0.224926 | 0        |
| Down | SCNN1G   | 19 | 0.001794 | 974542  | 0.233838 | 0.088235 |
| Down | POU2AF1  | 19 | 0.005426 | 1886150 | 0.231267 | 0        |
| Down | CLEC3B   | 19 | 0.003446 | 686120  | 0.253824 | 0.014706 |
| Down | SGK2     | 19 | 0.003011 | 2291524 | 0.255806 | 0        |
| Down | COL4A6   | 19 | 0.004108 | 2503680 | 0.231257 | 0        |
| Down | GRIA4    | 18 | 0.004013 | 2094936 | 0.235172 | 0        |
| Down | RAB27B   | 18 | 0.003176 | 889536  | 0.249147 | 0.013072 |
| Down | F13A1    | 18 | 0.003111 | 636426  | 0.267886 | 0.05     |
| Down | SYT16    | 18 | 0.003942 | 610066  | 0.237224 | 0        |
| Down | GPT2     | 18 | 0.004219 | 2205028 | 0.24423  | 0        |
| Down | CKMT2    | 18 | 0.003008 | 650282  | 0.255486 | 0.025    |
| Down | ORM1     | 17 | 0.003066 | 2394818 | 0.233881 | 0.007353 |
| Down | PDZD3    | 17 | 0.005754 | 836546  | 0.221188 | 0        |
| Down | SPDEF    | 17 | 0.00438  | 1902948 | 0.247842 | 0        |
| Down | SERPINA4 | 17 | 0.003389 | 1618954 | 0.242055 | 0        |
| Down | CYP3A4   | 17 | 0.00331  | 1029374 | 0.24409  | 0.028571 |
| Down | HOMER2   | 17 | 0.004213 | 2318450 | 0.2334   | 0        |
| Down | GSTA1    | 17 | 0.003515 | 1770658 | 0.250711 | 0.038095 |
| Down | CYP2C8   | 17 | 0.002329 | 1066708 | 0.23901  | 0        |
| Down | MAL      | 17 | 0.003795 | 1666176 | 0.240382 | 0        |
| Down | BPIFB1   | 17 | 0.002977 | 2398972 | 0.246159 | 0        |

---

---

|      |          |    |          |         |          |          |
|------|----------|----|----------|---------|----------|----------|
| Down | COL17A1  | 16 | 0.002553 | 1165170 | 0.246408 | 0        |
| Down | EDARADD  | 16 | 0.002099 | 1184864 | 0.233166 | 0        |
| Down | CYP2C9   | 16 | 0.002334 | 475378  | 0.234117 | 0.025    |
| Down | EPB41L4B | 16 | 0.003783 | 1719180 | 0.243196 | 0        |
| Down | MUC5B    | 16 | 0.003656 | 1742484 | 0.254748 | 0.008333 |
| Down | CGNL1    | 16 | 0.00242  | 1294404 | 0.24865  | 0        |
| Down | AKR1C2   | 15 | 0.002609 | 727192  | 0.228844 | 0.025641 |
| Down | SLPI     | 15 | 0.003639 | 1592814 | 0.245167 | 0        |
| Down | AKR1B10  | 15 | 0.002313 | 855778  | 0.229543 | 0.009524 |
| Down | TRIM50   | 15 | 0.003357 | 1937636 | 0.213465 | 0        |
| Down | TST      | 15 | 0.002387 | 1686500 | 0.230797 | 0        |
| Down | KLF15    | 15 | 0.002427 | 1312738 | 0.225164 | 0        |
| Down | GABRB3   | 14 | 0.00218  | 943302  | 0.225941 | 0        |
| Down | C6       | 14 | 0.002538 | 1748954 | 0.244323 | 0        |
| Down | ASB11    | 14 | 0.002102 | 1319614 | 0.231351 | 0        |
| Down | TMEM92   | 14 | 0.002742 | 768258  | 0.256538 | 0        |
| Down | PTGR1    | 14 | 0.002181 | 1002112 | 0.221543 | 0        |
| Down | CTSE     | 14 | 0.002273 | 897066  | 0.223471 | 0        |
| Down | SYTL2    | 13 | 0.002043 | 537190  | 0.247338 | 0        |
| Down | ARHGDIG  | 13 | 0.003657 | 1180020 | 0.219998 | 0        |
| Down | SLC9A3   | 13 | 0.001716 | 783146  | 0.222324 | 0        |
| Down | SULT1C2  | 13 | 0.002072 | 1077230 | 0.2131   | 0        |
| Down | SLC1A2   | 13 | 0.001883 | 1174276 | 0.230433 | 0        |
| Down | PBLD     | 13 | 0.002864 | 1604148 | 0.221707 | 0        |
| Down | DEFB1    | 13 | 0.002672 | 969434  | 0.214874 | 0        |
| Down | PLLP     | 13 | 0.002953 | 1704122 | 0.210528 | 0        |
| Down | BHMT     | 12 | 0.001444 | 462034  | 0.200078 | 0        |
| Down | GATA6    | 12 | 0.001888 | 766242  | 0.227925 | 0.015152 |
| Down | SERPINB7 | 12 | 0.001574 | 903854  | 0.221697 | 0        |
| Down | CHGA     | 12 | 0.002669 | 892042  | 0.237953 | 0        |
| Down | SLC5A5   | 12 | 0.001844 | 1189896 | 0.214487 | 0        |
| Down | CAPN13   | 12 | 0.002512 | 1267060 | 0.214649 | 0        |
| Down | AKR7A3   | 11 | 0.002079 | 1092290 | 0.218905 | 0        |
| Down | EPS8L1   | 11 | 0.00158  | 1034458 | 0.227337 | 0        |
| Down | TFR2     | 11 | 0.002136 | 335802  | 0.241712 | 0        |
| Down | KLF2     | 11 | 0.001827 | 864958  | 0.229162 | 0.036364 |
| Down | SLC9A2   | 11 | 0.001361 | 674648  | 0.231749 | 0        |
| Down | MAOA     | 11 | 0.001393 | 577172  | 0.229615 | 0        |
| Down | AKR1C3   | 11 | 0.002239 | 398010  | 0.2158   | 0.054545 |
| Down | REG3A    | 11 | 0.001394 | 775802  | 0.230807 | 0        |
| Down | GHRL     | 11 | 0.003071 | 422262  | 0.230714 | 0        |
| Down | DHRS9    | 11 | 0.002519 | 888628  | 0.20417  | 0        |
| Down | AKR1B15  | 11 | 0.001364 | 380620  | 0.232964 | 0.018182 |

---



---

|      |          |    |          |         |          |          |
|------|----------|----|----------|---------|----------|----------|
| Down | SEMA3B   | 11 | 0.001852 | 912096  | 0.223676 | 0        |
| Down | CYSTM1   | 11 | 0.002071 | 692870  | 0.215718 | 0        |
| Down | AMTN     | 11 | 0.001781 | 621822  | 0.219159 | 0        |
| Down | GKN1     | 11 | 8.02E-04 | 226994  | 0.217972 | 0        |
| Down | AMPD1    | 11 | 8.02E-04 | 705838  | 0.229502 | 0        |
| Down | MLPH     | 10 | 0.001483 | 571000  | 0.262331 | 0.088889 |
| Down | TESC     | 10 | 0.001621 | 186720  | 0.23063  | 0.071429 |
| Down | APOBEC1  | 10 | 0.002094 | 841430  | 0.200196 | 0        |
| Down | AKR1C1   | 10 | 0.001725 | 316338  | 0.225492 | 0.071429 |
| Down | RPRM     | 10 | 0.001932 | 971234  | 0.229646 | 0        |
| Down | AQP5     | 10 | 0.001026 | 462940  | 0.220787 | 0        |
| Down | GCNT2    | 10 | 0.002683 | 1431378 | 0.220463 | 0        |
| Down | LIPF     | 10 | 0.002681 | 291688  | 0.235097 | 0        |
| Down | ENTPD5   | 10 | 0.001423 | 576438  | 0.221966 | 0        |
| Down | CYP2C18  | 10 | 0.00151  | 590472  | 0.218699 | 0.022222 |
| Down | XK       | 10 | 0.00259  | 915288  | 0.211688 | 0        |
| Down | UGT1A6   | 10 | 3.51E-04 | 63358   | 0.212075 | 0.25     |
| Down | FOLR1    | 10 | 0.001826 | 786520  | 0.229811 | 0        |
| Down | RASSF6   | 9  | 0.001679 | 758932  | 0.222314 | 0        |
| Down | SLC4A4   | 9  | 8.25E-04 | 147548  | 0.228547 | 0        |
| Down | HAPLN1   | 9  | 0.002127 | 937726  | 0.221514 | 0        |
| Down | ALDH1A1  | 9  | 0.001071 | 502514  | 0.230225 | 0        |
| Down | PAIP2B   | 9  | 0.001898 | 820018  | 0.212031 | 0        |
| Down | FNDC5    | 9  | 0.00116  | 227236  | 0.234805 | 0        |
| Down | OASL     | 9  | 0.001035 | 554244  | 0.235704 | 0        |
| Down | CYP3A5   | 9  | 0.001621 | 242422  | 0.236227 | 0        |
| Down | SCG3     | 9  | 0.00171  | 397816  | 0.234751 | 0        |
| Down | ANGPTL3  | 9  | 0.001408 | 534524  | 0.201355 | 0        |
| Down | CXCL14   | 9  | 0.001418 | 687382  | 0.225194 | 0        |
| Down | FAM3B    | 9  | 0.002213 | 335698  | 0.2483   | 0        |
| Down | RNASE1   | 8  | 8.75E-04 | 328862  | 0.22215  | 0        |
| Down | BCAS1    | 8  | 7.11E-04 | 423002  | 0.24225  | 0        |
| Down | HGD      | 8  | 0.001216 | 788412  | 0.213572 | 0        |
| Down | C4orf19  | 8  | 0.001639 | 223746  | 0.256512 | 0.071429 |
| Down | MYRIP    | 8  | 0.001238 | 430996  | 0.249634 | 0        |
| Down | CIDEC    | 8  | 0.001237 | 380180  | 0.208885 | 0        |
| Down | CA4      | 8  | 6.78E-04 | 175498  | 0.219715 | 0        |
| Down | AQP4     | 8  | 7.48E-04 | 268154  | 0.211916 | 0        |
| Down | IGFBP2   | 8  | 0.00149  | 766678  | 0.221294 | 0        |
| Down | HTR1E    | 8  | 9.77E-04 | 621360  | 0.233262 | 0        |
| Down | SULT2A1  | 8  | 7.70E-04 | 247322  | 0.211732 | 0        |
| Down | C1orf116 | 8  | 7.46E-04 | 480606  | 0.241187 | 0        |
| Down | FXYP3    | 8  | 0.001716 | 698152  | 0.219658 | 0        |

---

---

|      |          |   |          |         |          |          |
|------|----------|---|----------|---------|----------|----------|
| Down | TMEM38A  | 8 | 0.001989 | 673836  | 0.209975 | 0        |
| Down | FUT9     | 8 | 0.001439 | 449312  | 0.206055 | 0        |
| Down | FCGBP    | 8 | 5.65E-04 | 331640  | 0.230287 | 0        |
| Down | PRDM16   | 8 | 6.15E-04 | 224982  | 0.23176  | 0        |
| Down | ITPKA    | 8 | 6.95E-04 | 310188  | 0.215991 | 0        |
| Down | BMP5     | 8 | 0.001564 | 204476  | 0.24629  | 0        |
| Down | RGN      | 8 | 2.20E-04 | 146076  | 0.221064 | 0        |
| Down | SOSTDC1  | 7 | 0.001188 | 367662  | 0.180492 | 0        |
| Down | APOA4    | 7 | 4.08E-04 | 165970  | 0.21402  | 0        |
| Down | ZBTB7C   | 7 | 0.001031 | 422450  | 0.227905 | 0        |
| Down | METTL7A  | 7 | 4.95E-04 | 194766  | 0.227601 | 0        |
| Down | ACADL    | 7 | 0.001679 | 791198  | 0.227946 | 0        |
| Down | CYP4F12  | 7 | 9.87E-04 | 279876  | 0.220311 | 0        |
| Down | PKIB     | 7 | 0.001587 | 460738  | 0.199914 | 0        |
| Down | CCBE1    | 7 | 0.002002 | 326496  | 0.19495  | 0        |
| Down | TFCP2L1  | 7 | 4.28E-04 | 250206  | 0.20633  | 0        |
| Down | PALM3    | 7 | 0.00104  | 644144  | 0.248638 | 0        |
| Down | HYAL1    | 7 | 0.002205 | 417022  | 0.238754 | 0        |
| Down | ADAMTSL1 | 7 | 9.43E-04 | 207474  | 0.199906 | 0        |
| Down | SYTL5    | 6 | 0.001222 | 233628  | 0.223393 | 0        |
| Down | GSTA2    | 6 | 8.20E-04 | 333722  | 0.204948 | 0.133333 |
| Down | DPT      | 6 | 4.89E-04 | 261260  | 0.232265 | 0        |
| Down | MT1X     | 6 | 3.73E-04 | 229168  | 0.229285 | 0        |
| Down | BEX5     | 6 | 7.89E-04 | 108852  | 0.200715 | 0        |
| Down | ATP4B    | 6 | 0.002043 | 235970  | 0.235878 | 0        |
| Down | PLIN5    | 6 | 0.001333 | 771154  | 0.195629 | 0        |
| Down | CCL28    | 6 | 0.001575 | 487862  | 0.211872 | 0        |
| Down | UPK1B    | 6 | 0.001572 | 934520  | 0.192781 | 0        |
| Down | MAMDC2   | 6 | 0.001576 | 318360  | 0.213296 | 0        |
| Down | SIGLEC11 | 6 | 5.99E-04 | 207770  | 0.228088 | 0        |
| Down | PLAC8    | 6 | 3.02E-04 | 225896  | 0.228527 | 0        |
| Down | RAB37    | 6 | 7.07E-04 | 123228  | 0.228967 | 0        |
| Down | LGALS9B  | 6 | 3.47E-04 | 189584  | 0.218307 | 0        |
| Down | ARL14    | 6 | 0.001956 | 1716690 | 0.182771 | 0        |
| Down | SH3BGRL2 | 6 | 0.001142 | 565738  | 0.239863 | 0        |
| Down | SST      | 6 | 0.002571 | 944178  | 0.209665 | 0.066667 |
| Down | SLC16A7  | 6 | 0.00134  | 493152  | 0.193116 | 0        |
| Down | FA2H     | 6 | 6.44E-04 | 190132  | 0.205889 | 0        |
| Down | CPA2     | 6 | 8.69E-04 | 220104  | 0.204187 | 0        |
| Down | DNER     | 6 | 5.68E-04 | 364110  | 0.227075 | 0        |
| Down | GDPD3    | 6 | 2.89E-04 | 143022  | 0.209949 | 0        |
| Down | KCNJ15   | 5 | 0.001063 | 395016  | 0.212383 | 0        |
| Down | GCKR     | 5 | 8.07E-04 | 358596  | 0.212613 | 0        |

---

|      |         |   |          |        |          |          |
|------|---------|---|----------|--------|----------|----------|
| Down | HAS3    | 5 | 7.83E-04 | 180102 | 0.170839 | 0        |
| Down | IGFALS  | 5 | 8.48E-04 | 200704 | 0.198178 | 0        |
| Down | CCKAR   | 5 | 4.00E-08 | 2      | 0.18778  | 0.666667 |
| Down | TFF2    | 5 | 4.28E-04 | 128148 | 0.208808 | 0        |
| Down | SSTR1   | 5 | 8.16E-04 | 303142 | 0.175286 | 0.1      |
| Down | GPX3    | 5 | 7.83E-04 | 182594 | 0.193995 | 0        |
| Down | ORM2    | 5 | 1.57E-04 | 35318  | 0.220692 | 0.1      |
| Down | APOC3   | 5 | 4.14E-04 | 47088  | 0.233667 | 0.2      |
| Down | DDX60   | 5 | 8.81E-04 | 460534 | 0.218307 | 0        |
| Down | HPN     | 5 | 7.26E-04 | 310120 | 0.230194 | 0        |
| Down | GPT     | 5 | 8.29E-04 | 291602 | 0.206714 | 0        |
| Down | ODAM    | 5 | 8.57E-04 | 403252 | 0.23236  | 0        |
| Down | PAPPA2  | 5 | 8.40E-04 | 242380 | 0.196994 | 0        |
| Down | FMO5    | 5 | 8.78E-04 | 467960 | 0.215254 | 0        |
| Down | SLC16A9 | 5 | 8.61E-04 | 269782 | 0.220074 | 0        |
| Down | TMEM220 | 5 | 5.22E-04 | 290922 | 0.220854 | 0        |
| Down | GDPD2   | 5 | 0.001271 | 445450 | 0.207015 | 0        |
| Down | VILL    | 5 | 8.06E-04 | 419916 | 0.21569  | 0        |
| Down | ADH7    | 4 | 5.91E-05 | 29910  | 0.214631 | 0        |
| Down | CLIC6   | 4 | 8.08E-04 | 292454 | 0.186417 | 0        |
| Down | GALNT5  | 4 | 4.33E-04 | 155130 | 0.204366 | 0        |
| Down | KCNJ16  | 4 | 8.03E-04 | 105342 | 0.195794 | 0        |
| Down | CDHR2   | 4 | 0.001174 | 433218 | 0.180696 | 0        |
| Down | KCNE2   | 4 | 5.03E-04 | 75192  | 0.235954 | 0.166667 |
| Down | SULT1B1 | 4 | 4.79E-04 | 89616  | 0.204735 | 0        |
| Down | VSTM2A  | 4 | 7.96E-04 | 681826 | 0.169553 | 0        |
| Down | RASEF   | 4 | 6.42E-04 | 174228 | 0.220463 | 0        |
| Down | GSTA3   | 4 | 5.10E-04 | 346118 | 0.238809 | 0.5      |
| Down | ADH1C   | 4 | 1        | 2      | 1        | 0        |
| Down | RIMS4   | 4 | 4.34E-04 | 216850 | 0.21482  | 0        |
| Down | PGC     | 4 | 3.15E-04 | 58062  | 0.251142 | 0        |
| Down | ENAM    | 4 | 1.68E-04 | 93264  | 0.210815 | 0        |
| Down | FSIP2   | 4 | 8.09E-04 | 202852 | 0.206338 | 0        |
| Down | SNORD22 | 4 | 3.76E-05 | 31698  | 0.209613 | 0        |
| Down | TM7SF2  | 4 | 4.65E-04 | 146028 | 0.214496 | 0        |
| Down | DMRTA1  | 4 | 9.92E-05 | 71054  | 0.21855  | 0        |
| Down | SCUBE2  | 4 | 3.91E-04 | 94424  | 0.187498 | 0        |
| Down | TMPRSS2 | 4 | 2.21E-05 | 4940   | 0.217944 | 0        |
| Down | SCARA5  | 4 | 5.52E-04 | 205628 | 0.215645 | 0        |
| Down | TMEM100 | 4 | 4.80E-04 | 116462 | 0.203253 | 0        |
| Down | PTGDR2  | 4 | 1        | 12     | 1        | 0        |
| Down | CAPN8   | 4 | 4.14E-04 | 137042 | 0.200597 | 0        |
| Down | ZNF385B | 4 | 7.92E-04 | 439412 | 0.235313 | 0        |

---

|      |            |   |          |        |          |          |
|------|------------|---|----------|--------|----------|----------|
| Down | RANBP3L    | 4 | 8.11E-04 | 270746 | 0.209966 | 0        |
| Down | C6orf58    | 4 | 4.97E-04 | 152308 | 0.220055 | 0        |
| Down | PLIN4      | 4 | 4.89E-05 | 42320  | 0.220444 | 0        |
| Down | ACSM1      | 4 | 7.89E-04 | 357944 | 0.177842 | 0        |
| Down | SLC7A8     | 3 | 7.83E-04 | 207170 | 0.191667 | 0        |
| Down | CLCNKA     | 3 | 0        | 0      | 0.18787  | 0        |
| Down | DUOX1      | 3 | 4.09E-04 | 206852 | 0.179214 | 0        |
| Down | APOBEC2    | 3 | 0        | 0      | 0.166808 | 0        |
| Down | ANXA10     | 3 | 4.21E-04 | 203664 | 0.234106 | 0        |
| Down | MT1H       | 3 | 3.32E-04 | 64160  | 0.191459 | 0        |
| Down | B4GALNT3   | 3 | 4.02E-04 | 211438 | 0.19202  | 0        |
| Down | SOX21      | 3 | 3.00E-08 | 2      | 0.240767 | 0.666667 |
| Down | NRG4       | 3 | 5.60E-04 | 49388  | 0.234267 | 0        |
| Down | RHBDL2     | 3 | 4.08E-04 | 193280 | 0.180946 | 0        |
| Down | GATA5      | 3 | 3.91E-04 | 70686  | 0.209613 | 0.333333 |
| Down | ADTRP      | 3 | 2.92E-05 | 10622  | 0.192425 | 0        |
| Down | PRSS8      | 3 | 4.57E-04 | 232278 | 0.22869  | 0        |
| Down | STYK1      | 3 | 2.69E-05 | 15578  | 0.218494 | 0        |
| Down | B3GAT1     | 3 | 0        | 0      | 0.18006  | 0        |
| Down | PSCA       | 3 | 6.95E-04 | 79296  | 0.241335 | 0        |
| Down | ADHFE1     | 3 | 8.07E-05 | 30016  | 0.199805 | 0        |
| Down | CLDN18     | 3 | 4.17E-04 | 121720 | 0.197679 | 0        |
| Down | LRRC66     | 3 | 1.72E-04 | 84034  | 0.221418 | 0        |
| Down | RNASE4     | 3 | 0        | 0      | 0.192324 | 0        |
| Down | KIAA0895   | 3 | 5.83E-05 | 24890  | 0.215581 | 0        |
| Down | CYP2C19    | 2 | 0        | 0      | 0.200274 | 1        |
| Down | FAM135B    | 2 | 1.11E-05 | 6158   | 0.192795 | 0        |
| Down | SLC9A4     | 2 | 3.51E-06 | 1708   | 0.202689 | 0        |
| Down | MT1G       | 2 | 9.97E-05 | 24412  | 0.172517 | 0        |
| Down | C22orf23   | 2 | 3.91E-04 | 43196  | 0.16031  | 0        |
| Down | DCAF12L1   | 2 | 1        | 2      | 1        | 0        |
| Down | ANO5       | 2 | 1.16E-04 | 17930  | 0.21883  | 0        |
| Down | TSPAN1     | 2 | 7.81E-06 | 4920   | 0.183381 | 0        |
| Down | ARHGEF37   | 2 | 3.91E-04 | 89488  | 0.215282 | 0        |
| Down | ELOVL6     | 2 | 3.91E-04 | 115044 | 0.204981 | 0        |
| Down | GPR155     | 2 | 5.21E-05 | 24726  | 0.208979 | 0        |
| Down | PM20D1     | 2 | 3.84E-06 | 2032   | 0.172669 | 0        |
| Down | ST6GALNAC1 | 2 | 6.04E-05 | 4124   | 0.250171 | 0        |
| Down | NWD1       | 2 | 3.91E-04 | 113138 | 0.197199 | 0        |
| Down | IGSF9      | 2 | 5.44E-05 | 22396  | 0.216375 | 0        |
| Down | SLC26A9    | 2 | 1.89E-04 | 21422  | 0.238342 | 0        |
| Down | TCN1       | 2 | 3.66E-05 | 43932  | 0.218596 | 0        |
| Down | ENTPD3     | 2 | 3.76E-05 | 15404  | 0.196516 | 0        |

---

---

|      |          |   |          |        |          |   |
|------|----------|---|----------|--------|----------|---|
| Down | MSMB     | 2 | 9.51E-05 | 49854  | 0.214992 | 0 |
| Down | CADM2    | 2 | 3.91E-04 | 72366  | 0.204858 | 0 |
| Down | MT1M     | 2 | 3.91E-04 | 145464 | 0.190028 | 0 |
| Down | MT1F     | 2 | 3.91E-04 | 224466 | 0.171194 | 0 |
| Down | IRX3     | 2 | 1.13E-05 | 6548   | 0.207007 | 0 |
| Down | FAM177B  | 2 | 1.06E-05 | 8836   | 0.198555 | 0 |
| Down | ANKRD22  | 2 | 9.29E-06 | 1450   | 0.19975  | 0 |
| Down | PROM2    | 2 | 5.53E-05 | 32190  | 0.222818 | 0 |
| Down | C1orf115 | 2 | 1.47E-04 | 35652  | 0.214983 | 0 |
| Down | CNTN3    | 2 | 0        | 0      | 0.236928 | 1 |
| Down | CAPN9    | 2 | 1        | 2      | 1        | 0 |
| Down | TTC39A   | 1 | 0        | 0      | 1        | 0 |
| Down | DUOX2    | 1 | 0        | 0      | 0.172867 | 0 |
| Down | MTRNR2L8 | 1 | 0        | 0      | 0.204965 | 0 |
| Down | KIAA1324 | 1 | 0        | 0      | 0.224788 | 0 |
| Down | UBE2QL1  | 1 | 0        | 0      | 0.179245 | 0 |
| Down | MT1E     | 1 | 0        | 0      | 0.206689 | 0 |
| Down | ADAMTS15 | 1 | 0        | 0      | 0.207486 | 0 |
| Down | UNC5D    | 1 | 0        | 0      | 0.21045  | 0 |
| Down | CWH43    | 1 | 0        | 0      | 0.167722 | 0 |
| Down | B3GNT7   | 1 | 0        | 0      | 0.190987 | 0 |
| Down | C16orf89 | 1 | 0        | 0      | 0.199244 | 0 |
| Down | FER1L4   | 1 | 0        | 0      | 0.140277 | 0 |
| Down | IL17REL  | 1 | 0        | 0      | 0.215263 | 0 |
| Down | ENPP5    | 1 | 0        | 0      | 0.215263 | 0 |
| Down | LYPD6B   | 1 | 0        | 0      | 0.178357 | 0 |
| Down | SHISA6   | 1 | 0        | 0      | 0.185081 | 0 |
| Down | FER1L6   | 1 | 0        | 0      | 0.203504 | 0 |
| Down | COL6A5   | 1 | 0        | 0      | 0.204677 | 0 |
| Down | AQP10    | 1 | 0        | 0      | 0.185733 | 0 |
| Down | SEC14L5  | 1 | 0        | 0      | 0.236183 | 0 |
| Down | HPGD     | 1 | 0        | 0      | 0.214766 | 0 |
| Down | CNTD1    | 1 | 0        | 0      | 0.666667 | 0 |
| Down | GGT6     | 1 | 0        | 0      | 0.666667 | 0 |
| Down | PDILT    | 1 | 0        | 0      | 0.173137 | 0 |
| Down | GKN2     | 1 | 0        | 0      | 0.20188  | 0 |
| Down | CLDN23   | 1 | 0        | 0      | 0.198825 | 0 |
| Down | HRH2     | 1 | 0        | 0      | 0.195128 | 0 |
| Down | ADAM28   | 1 | 0        | 0      | 0.184706 | 0 |
| Down | PRIMA1   | 1 | 0        | 0      | 1        | 0 |
| Down | MUC6     | 1 | 0        | 0      | 0.20188  | 0 |
| Down | IRX5     | 1 | 0        | 0      | 1        | 0 |
| Down | GUCA2B   | 1 | 0        | 0      | 1        | 0 |

---

---

|      |          |     |          |          |          |          |
|------|----------|-----|----------|----------|----------|----------|
| Down | ATP13A4  | 1   | 0        | 0        | 1        | 0        |
| Down | SOX2     | 361 | 0.130645 | 91698482 | 0.314504 | 3.13E-05 |
| Down | RIPK4    | 336 | 0.128603 | 98813078 | 0.314446 | 0        |
| Down | FOXA1    | 290 | 0.103625 | 62359854 | 0.309195 | 3.87E-04 |
| Down | EEF1A2   | 192 | 0.092037 | 39507690 | 0.326061 | 7.09E-04 |
| Down | ANG      | 126 | 0.033985 | 31690134 | 0.29174  | 0        |
| Down | FGB      | 119 | 0.043651 | 12625862 | 0.307262 | 0.004558 |
| Down | PTGER3   | 113 | 0.038772 | 17588946 | 0.28297  | 3.16E-04 |
| Down | CKB      | 111 | 0.036348 | 17987186 | 0.29959  | 0.002502 |
| Down | FOXQ1    | 108 | 0.024413 | 25595054 | 0.265424 | 0        |
| Down | ERBB4    | 101 | 0.039648 | 13011632 | 0.303684 | 0.00268  |
| Down | PRKAA2   | 100 | 0.028743 | 15759608 | 0.279198 | 0        |
| Down | APOA1    | 100 | 0.036853 | 10368028 | 0.293786 | 0.00451  |
| Down | ESRRB    | 98  | 0.036893 | 21650562 | 0.308952 | 0.001052 |
| Down | OXCT1    | 97  | 0.02688  | 16657230 | 0.275526 | 0        |
| Down | ATP4A    | 92  | 0.038284 | 7433528  | 0.297688 | 2.50E-04 |
| Down | F2RL1    | 90  | 0.02916  | 16825260 | 0.263862 | 0        |
| Down | EYA2     | 88  | 0.023357 | 20081684 | 0.264175 | 0        |
| Down | CDH2     | 83  | 0.025141 | 12416288 | 0.280608 | 0.001469 |
| Down | SH3GL2   | 81  | 0.028376 | 10624252 | 0.281334 | 3.25E-04 |
| Down | DUSP19   | 78  | 0.022667 | 8084684  | 0.289509 | 0.001053 |
| Down | FAM189A2 | 78  | 0.023811 | 11453482 | 0.276839 | 9.99E-04 |
| Down | ALDOC    | 75  | 0.024085 | 9254824  | 0.292324 | 0.004685 |
| Down | SLC25A4  | 74  | 0.020138 | 14876712 | 0.282704 | 0        |
| Down | HBB      | 72  | 0.024297 | 9837400  | 0.292358 | 0        |
| Down | SELENBP1 | 69  | 0.020559 | 16033854 | 0.263576 | 0        |
| Down | TTR      | 65  | 0.019611 | 8877534  | 0.281971 | 0.004608 |
| Down | NR0B2    | 65  | 0.018911 | 9601392  | 0.285754 | 4.81E-04 |
| Down | SLC15A1  | 65  | 0.022335 | 9413034  | 0.259481 | 0        |
| Down | MRAP2    | 64  | 0.018209 | 14317820 | 0.246694 | 0        |
| Down | APLP1    | 61  | 0.016887 | 7157580  | 0.275734 | 5.84E-04 |
| Down | MIA2     | 61  | 0.023593 | 3857116  | 0.292911 | 0.003507 |
| Down | MUC1     | 59  | 0.01901  | 8685324  | 0.297272 | 0.004386 |
| Down | TMEM171  | 57  | 0.015929 | 7178790  | 0.265162 | 0        |
| Down | VSIG1    | 57  | 0.015506 | 9968024  | 0.251724 | 0        |
| Down | SLC2A12  | 56  | 0.014848 | 11274816 | 0.245344 | 0        |
| Down | KIF1A    | 55  | 0.014262 | 10095312 | 0.273082 | 0        |
| Down | LIPH     | 54  | 0.014461 | 5415600  | 0.258432 | 0        |
| Down | FOXA3    | 53  | 0.011677 | 3197724  | 0.277576 | 0.007059 |
| Down | FBP1     | 52  | 0.011778 | 5755732  | 0.259718 | 0.007347 |
| Down | ID1      | 51  | 0.014356 | 8073662  | 0.260049 | 0        |
| Down | GLUL     | 51  | 0.014074 | 7290628  | 0.273901 | 0        |
| Down | LTF      | 51  | 0.015012 | 8074792  | 0.27279  | 0.001569 |

---

---

|      |          |    |          |         |          |          |
|------|----------|----|----------|---------|----------|----------|
| Down | SUSD4    | 50 | 0.014117 | 8153740 | 0.252171 | 0        |
| Down | MYOC     | 49 | 0.012703 | 5520884 | 0.273784 | 0        |
| Down | COL2A1   | 48 | 0.014506 | 2615324 | 0.251625 | 0        |
| Down | CSTA     | 47 | 0.009908 | 5708660 | 0.266226 | 0        |
| Down | PTPRR    | 46 | 0.012338 | 3050164 | 0.277425 | 0.008457 |
| Down | ESRRG    | 46 | 0.01155  | 4874608 | 0.278438 | 0.001057 |
| Down | SLC9A1   | 45 | 0.021666 | 3586826 | 0.290993 | 0.008081 |
| Down | RORC     | 45 | 0.010968 | 7194834 | 0.26283  | 0        |
| Down | FRMD1    | 45 | 0.01312  | 1673830 | 0.264627 | 0.005051 |
| Down | NCAM1    | 44 | 0.011569 | 4653244 | 0.264476 | 0        |
| Down | DHRS7    | 43 | 0.013463 | 2866004 | 0.265479 | 0.001107 |
| Down | IL1R2    | 42 | 0.011437 | 5905866 | 0.234503 | 0        |
| Down | CHGB     | 42 | 0.010047 | 5822946 | 0.266963 | 0        |
| Down | BTNL8    | 42 | 0.011912 | 2086382 | 0.241256 | 0        |
| Down | FBXL13   | 42 | 0.012583 | 5749328 | 0.240111 | 0        |
| Down | FGA      | 41 | 0.010321 | 3281616 | 0.289247 | 0.062078 |
| Down | SERPINA5 | 41 | 0.012219 | 1908132 | 0.278756 | 0.008097 |
| Down | LDHD     | 40 | 0.011361 | 9207334 | 0.235747 | 0        |
| Down | FGG      | 38 | 0.007185 | 2451080 | 0.281195 | 0.049206 |
| Down | RPS6KA6  | 37 | 0.01036  | 3621900 | 0.266684 | 0.004505 |
| Down | CYP2S1   | 37 | 0.009679 | 1915748 | 0.257936 | 0        |
| Down | KLF4     | 36 | 0.008725 | 6243510 | 0.274829 | 0        |
| Down | CA9      | 36 | 0.00838  | 3853714 | 0.278574 | 0        |
| Down | DHCR24   | 36 | 0.006868 | 4428340 | 0.272965 | 0        |
| Down | GALE     | 35 | 0.008601 | 4052878 | 0.272805 | 0        |
| Down | GPRC5C   | 35 | 0.012273 | 2377340 | 0.271515 | 0.003361 |
| Down | NQO1     | 34 | 0.008383 | 5150060 | 0.274136 | 0        |
| Down | EPN3     | 34 | 0.010642 | 6541196 | 0.240269 | 0        |
| Down | TMED6    | 34 | 0.008373 | 4030958 | 0.222818 | 0        |
| Down | RAB27A   | 33 | 0.0091   | 2404172 | 0.26859  | 0.007576 |
| Down | KRT20    | 33 | 0.007564 | 4522038 | 0.244323 | 0        |
| Down | ALDOB    | 33 | 0.007577 | 5415906 | 0.25628  | 0        |
| Down | AZGP1    | 33 | 0.007325 | 4722950 | 0.260102 | 0        |
| Down | CYB5A    | 32 | 0.014497 | 2040568 | 0.281009 | 0.002016 |
| Down | PTPRN2   | 32 | 0.006444 | 5188802 | 0.24512  | 0        |
| Down | ME1      | 32 | 0.007918 | 3585304 | 0.249439 | 0        |
| Down | LEPR     | 31 | 0.008148 | 2585854 | 0.250184 | 0        |
| Down | S100P    | 31 | 0.00819  | 3141854 | 0.261794 | 0        |
| Down | MAP7D2   | 31 | 0.006379 | 3776744 | 0.240393 | 0        |
| Down | RIMS1    | 29 | 0.006836 | 2005214 | 0.262183 | 0.004926 |
| Down | CD36     | 29 | 0.006605 | 3244170 | 0.25791  | 0        |
| Down | VSIG2    | 29 | 0.005085 | 4523118 | 0.229594 | 0        |
| Down | CKM      | 28 | 0.006486 | 1114366 | 0.26363  | 0.015385 |

---



---

|      |         |    |          |         |          |          |
|------|---------|----|----------|---------|----------|----------|
| Down | PTPRZ1  | 27 | 0.004562 | 2671328 | 0.243834 | 0        |
| Down | PDIA2   | 27 | 0.011946 | 3842958 | 0.264791 | 0        |
| Down | UGT1A10 | 27 | 0.00529  | 2201280 | 0.236884 | 0.02     |
| Down | CMBL    | 27 | 0.005343 | 4698256 | 0.254001 | 0        |
| Down | LGALS9C | 27 | 0.006007 | 2789528 | 0.231267 | 0        |
| Down | KLK11   | 27 | 0.005922 | 3556426 | 0.237026 | 0        |
| Down | TFF1    | 26 | 0.00922  | 4457048 | 0.252932 | 0        |
| Down | INSIG1  | 26 | 0.005325 | 1743502 | 0.245875 | 0        |
| Down | RDH12   | 26 | 0.005489 | 2827404 | 0.239964 | 0        |
| Down | GALNT6  | 26 | 0.009106 | 2128734 | 0.260779 | 0        |
| Down | TPD52L1 | 25 | 0.004331 | 1988644 | 0.25113  | 0        |
| Down | GC      | 25 | 0.00488  | 2756190 | 0.254786 | 0        |
| Down | FOXA2   | 25 | 0.00442  | 692924  | 0.26162  | 0.027668 |
| Down | RAP1GAP | 25 | 0.005317 | 2730984 | 0.248493 | 0        |
| Down | XYLT2   | 25 | 0.005125 | 3604190 | 0.230953 | 0        |
| Down | PRLR    | 24 | 0.004513 | 2639920 | 0.241758 | 0        |
| Down | SCNN1B  | 24 | 0.003266 | 1693310 | 0.233134 | 0.051948 |
| Down | GNMT    | 24 | 0.003761 | 2292130 | 0.242538 | 0        |
| Down | CA2     | 23 | 0.005398 | 1512836 | 0.267312 | 0        |
| Down | CCKBR   | 23 | 0.004282 | 3289826 | 0.231162 | 0.009524 |
| Down | DSC2    | 23 | 0.002627 | 1332696 | 0.243057 | 0        |
| Down | SMPD3   | 23 | 0.00407  | 1526270 | 0.243462 | 0        |
| Down | SOWAHA  | 23 | 0.005986 | 3656274 | 0.222304 | 0        |
| Down | FBP2    | 22 | 0.00357  | 1236294 | 0.256075 | 0.047368 |
| Down | SCGN    | 22 | 0.005448 | 2292384 | 0.224363 | 0        |
| Down | CXADR   | 22 | 0.004966 | 1542936 | 0.256602 | 0        |
| Down | SCGB2A1 | 22 | 0.00411  | 1974286 | 0.247626 | 0        |
| Down | ALDH6A1 | 22 | 0.005212 | 3402338 | 0.242492 | 0        |
| Down | PDGFD   | 22 | 0.004274 | 2794740 | 0.226934 | 0        |
| Down | LIFR    | 21 | 0.004499 | 3194270 | 0.242423 | 0        |
| Down | KCNQ1   | 21 | 0.004852 | 1329562 | 0.26667  | 0.005848 |
| Down | PXMP2   | 21 | 0.009681 | 2045510 | 0.253585 | 0        |
| Down | SCIN    | 21 | 0.004409 | 3432750 | 0.257481 | 0        |
| Down | ALDH3A1 | 21 | 0.006292 | 975432  | 0.247662 | 0.011696 |
| Down | STX19   | 20 | 0.005007 | 1935164 | 0.20909  | 0        |
| Down | TCEAL2  | 20 | 0.003844 | 2368446 | 0.256576 | 0        |
| Down | A4GNT   | 20 | 0.004387 | 1662140 | 0.225542 | 0        |
| Down | CHIA    | 20 | 0.005062 | 3754078 | 0.241449 | 0        |
| Down | GCNT1   | 20 | 0.004201 | 1845148 | 0.224926 | 0        |
| Down | SCNN1G  | 19 | 0.001794 | 974542  | 0.233838 | 0.088235 |
| Down | POU2AF1 | 19 | 0.005426 | 1886150 | 0.231267 | 0        |
| Down | CLEC3B  | 19 | 0.003446 | 686120  | 0.253824 | 0.014706 |
| Down | SGK2    | 19 | 0.003011 | 2291524 | 0.255806 | 0        |

---

---

|      |          |    |          |         |          |          |
|------|----------|----|----------|---------|----------|----------|
| Down | COL4A6   | 19 | 0.004108 | 2503680 | 0.231257 | 0        |
| Down | GRIA4    | 18 | 0.004013 | 2094936 | 0.235172 | 0        |
| Down | RAB27B   | 18 | 0.003176 | 889536  | 0.249147 | 0.013072 |
| Down | F13A1    | 18 | 0.003111 | 636426  | 0.267886 | 0.05     |
| Down | SYT16    | 18 | 0.003942 | 610066  | 0.237224 | 0        |
| Down | GPT2     | 18 | 0.004219 | 2205028 | 0.24423  | 0        |
| Down | CKMT2    | 18 | 0.003008 | 650282  | 0.255486 | 0.025    |
| Down | ORM1     | 17 | 0.003066 | 2394818 | 0.233881 | 0.007353 |
| Down | PDZD3    | 17 | 0.005754 | 836546  | 0.221188 | 0        |
| Down | SPDEF    | 17 | 0.00438  | 1902948 | 0.247842 | 0        |
| Down | SERPINA4 | 17 | 0.003389 | 1618954 | 0.242055 | 0        |
| Down | CYP3A4   | 17 | 0.00331  | 1029374 | 0.24409  | 0.028571 |
| Down | HOMER2   | 17 | 0.004213 | 2318450 | 0.2334   | 0        |
| Down | GSTA1    | 17 | 0.003515 | 1770658 | 0.250711 | 0.038095 |
| Down | CYP2C8   | 17 | 0.002329 | 1066708 | 0.23901  | 0        |
| Down | MAL      | 17 | 0.003795 | 1666176 | 0.240382 | 0        |
| Down | BPIFB1   | 17 | 0.002977 | 2398972 | 0.246159 | 0        |
| Down | COL17A1  | 16 | 0.002553 | 1165170 | 0.246408 | 0        |
| Down | EDARADD  | 16 | 0.002099 | 1184864 | 0.233166 | 0        |
| Down | CYP2C9   | 16 | 0.002334 | 475378  | 0.234117 | 0.025    |
| Down | EPB41L4B | 16 | 0.003783 | 1719180 | 0.243196 | 0        |
| Down | MUC5B    | 16 | 0.003656 | 1742484 | 0.254748 | 0.008333 |
| Down | CGNL1    | 16 | 0.00242  | 1294404 | 0.24865  | 0        |
| Down | AKR1C2   | 15 | 0.002609 | 727192  | 0.228844 | 0.025641 |
| Down | SLPI     | 15 | 0.003639 | 1592814 | 0.245167 | 0        |
| Down | AKR1B10  | 15 | 0.002313 | 855778  | 0.229543 | 0.009524 |
| Down | TRIM50   | 15 | 0.003357 | 1937636 | 0.213465 | 0        |
| Down | TST      | 15 | 0.002387 | 1686500 | 0.230797 | 0        |
| Down | KLF15    | 15 | 0.002427 | 1312738 | 0.225164 | 0        |
| Down | GABRB3   | 14 | 0.00218  | 943302  | 0.225941 | 0        |
| Down | C6       | 14 | 0.002538 | 1748954 | 0.244323 | 0        |
| Down | ASB11    | 14 | 0.002102 | 1319614 | 0.231351 | 0        |
| Down | TMEM92   | 14 | 0.002742 | 768258  | 0.256538 | 0        |
| Down | PTGR1    | 14 | 0.002181 | 1002112 | 0.221543 | 0        |
| Down | CTSE     | 14 | 0.002273 | 897066  | 0.223471 | 0        |
| Down | SYTL2    | 13 | 0.002043 | 537190  | 0.247338 | 0        |
| Down | ARHGDIG  | 13 | 0.003657 | 1180020 | 0.219998 | 0        |
| Down | SLC9A3   | 13 | 0.001716 | 783146  | 0.222324 | 0        |
| Down | SULT1C2  | 13 | 0.002072 | 1077230 | 0.2131   | 0        |
| Down | SLC1A2   | 13 | 0.001883 | 1174276 | 0.230433 | 0        |
| Down | PBLD     | 13 | 0.002864 | 1604148 | 0.221707 | 0        |
| Down | DEFB1    | 13 | 0.002672 | 969434  | 0.214874 | 0        |
| Down | PLLP     | 13 | 0.002953 | 1704122 | 0.210528 | 0        |

---

---

|      |          |    |          |         |          |          |
|------|----------|----|----------|---------|----------|----------|
| Down | BHMT     | 12 | 0.001444 | 462034  | 0.200078 | 0        |
| Down | GATA6    | 12 | 0.001888 | 766242  | 0.227925 | 0.015152 |
| Down | SERPINB7 | 12 | 0.001574 | 903854  | 0.221697 | 0        |
| Down | CHGA     | 12 | 0.002669 | 892042  | 0.237953 | 0        |
| Down | SLC5A5   | 12 | 0.001844 | 1189896 | 0.214487 | 0        |
| Down | CAPN13   | 12 | 0.002512 | 1267060 | 0.214649 | 0        |
| Down | AKR7A3   | 11 | 0.002079 | 1092290 | 0.218905 | 0        |
| Down | EPS8L1   | 11 | 0.00158  | 1034458 | 0.227337 | 0        |
| Down | TFR2     | 11 | 0.002136 | 335802  | 0.241712 | 0        |
| Down | KLF2     | 11 | 0.001827 | 864958  | 0.229162 | 0.036364 |
| Down | SLC9A2   | 11 | 0.001361 | 674648  | 0.231749 | 0        |
| Down | MAOA     | 11 | 0.001393 | 577172  | 0.229615 | 0        |
| Down | AKR1C3   | 11 | 0.002239 | 398010  | 0.2158   | 0.054545 |
| Down | REG3A    | 11 | 0.001394 | 775802  | 0.230807 | 0        |
| Down | GHRL     | 11 | 0.003071 | 422262  | 0.230714 | 0        |
| Down | DHRS9    | 11 | 0.002519 | 888628  | 0.20417  | 0        |
| Down | AKR1B15  | 11 | 0.001364 | 380620  | 0.232964 | 0.018182 |
| Down | SEMA3B   | 11 | 0.001852 | 912096  | 0.223676 | 0        |
| Down | CYSTM1   | 11 | 0.002071 | 692870  | 0.215718 | 0        |
| Down | AMTN     | 11 | 0.001781 | 621822  | 0.219159 | 0        |
| Down | GKN1     | 11 | 8.02E-04 | 226994  | 0.217972 | 0        |
| Down | AMPD1    | 11 | 8.02E-04 | 705838  | 0.229502 | 0        |
| Down | MLPH     | 10 | 0.001483 | 571000  | 0.262331 | 0.088889 |
| Down | TESC     | 10 | 0.001621 | 186720  | 0.23063  | 0.071429 |
| Down | APOBEC1  | 10 | 0.002094 | 841430  | 0.200196 | 0        |
| Down | AKR1C1   | 10 | 0.001725 | 316338  | 0.225492 | 0.071429 |
| Down | RPRM     | 10 | 0.001932 | 971234  | 0.229646 | 0        |
| Down | AQP5     | 10 | 0.001026 | 462940  | 0.220787 | 0        |
| Down | GCNT2    | 10 | 0.002683 | 1431378 | 0.220463 | 0        |
| Down | LIPF     | 10 | 0.002681 | 291688  | 0.235097 | 0        |
| Down | ENTPD5   | 10 | 0.001423 | 576438  | 0.221966 | 0        |
| Down | CYP2C18  | 10 | 0.00151  | 590472  | 0.218699 | 0.022222 |
| Down | XK       | 10 | 0.00259  | 915288  | 0.211688 | 0        |
| Down | UGT1A6   | 10 | 3.51E-04 | 63358   | 0.212075 | 0.25     |
| Down | FOLR1    | 10 | 0.001826 | 786520  | 0.229811 | 0        |
| Down | RASSF6   | 9  | 0.001679 | 758932  | 0.222314 | 0        |
| Down | SLC4A4   | 9  | 8.25E-04 | 147548  | 0.228547 | 0        |
| Down | HAPLN1   | 9  | 0.002127 | 937726  | 0.221514 | 0        |
| Down | ALDH1A1  | 9  | 0.001071 | 502514  | 0.230225 | 0        |
| Down | PAIP2B   | 9  | 0.001898 | 820018  | 0.212031 | 0        |
| Down | FNDC5    | 9  | 0.00116  | 227236  | 0.234805 | 0        |
| Down | OASL     | 9  | 0.001035 | 554244  | 0.235704 | 0        |
| Down | CYP3A5   | 9  | 0.001621 | 242422  | 0.236227 | 0        |

---

---

|      |          |   |          |        |          |          |
|------|----------|---|----------|--------|----------|----------|
| Down | SCG3     | 9 | 0.00171  | 397816 | 0.234751 | 0        |
| Down | ANGPTL3  | 9 | 0.001408 | 534524 | 0.201355 | 0        |
| Down | CXCL14   | 9 | 0.001418 | 687382 | 0.225194 | 0        |
| Down | FAM3B    | 9 | 0.002213 | 335698 | 0.2483   | 0        |
| Down | RNASE1   | 8 | 8.75E-04 | 328862 | 0.22215  | 0        |
| Down | BCAS1    | 8 | 7.11E-04 | 423002 | 0.24225  | 0        |
| Down | HGD      | 8 | 0.001216 | 788412 | 0.213572 | 0        |
| Down | C4orf19  | 8 | 0.001639 | 223746 | 0.256512 | 0.071429 |
| Down | MYRIP    | 8 | 0.001238 | 430996 | 0.249634 | 0        |
| Down | CIDEC    | 8 | 0.001237 | 380180 | 0.208885 | 0        |
| Down | CA4      | 8 | 6.78E-04 | 175498 | 0.219715 | 0        |
| Down | AQP4     | 8 | 7.48E-04 | 268154 | 0.211916 | 0        |
| Down | IGFBP2   | 8 | 0.00149  | 766678 | 0.221294 | 0        |
| Down | HTR1E    | 8 | 9.77E-04 | 621360 | 0.233262 | 0        |
| Down | SULT2A1  | 8 | 7.70E-04 | 247322 | 0.211732 | 0        |
| Down | C1orf116 | 8 | 7.46E-04 | 480606 | 0.241187 | 0        |
| Down | FXYD3    | 8 | 0.001716 | 698152 | 0.219658 | 0        |
| Down | TMEM38A  | 8 | 0.001989 | 673836 | 0.209975 | 0        |
| Down | FUT9     | 8 | 0.001439 | 449312 | 0.206055 | 0        |
| Down | FCGBP    | 8 | 5.65E-04 | 331640 | 0.230287 | 0        |
| Down | PRDM16   | 8 | 6.15E-04 | 224982 | 0.23176  | 0        |
| Down | ITPKA    | 8 | 6.95E-04 | 310188 | 0.215991 | 0        |
| Down | BMP5     | 8 | 0.001564 | 204476 | 0.24629  | 0        |
| Down | RGN      | 8 | 2.20E-04 | 146076 | 0.221064 | 0        |
| Down | SOSTDC1  | 7 | 0.001188 | 367662 | 0.180492 | 0        |
| Down | APOA4    | 7 | 4.08E-04 | 165970 | 0.21402  | 0        |
| Down | ZBTB7C   | 7 | 0.001031 | 422450 | 0.227905 | 0        |
| Down | METTL7A  | 7 | 4.95E-04 | 194766 | 0.227601 | 0        |
| Down | ACADL    | 7 | 0.001679 | 791198 | 0.227946 | 0        |
| Down | CYP4F12  | 7 | 9.87E-04 | 279876 | 0.220311 | 0        |
| Down | PKIB     | 7 | 0.001587 | 460738 | 0.199914 | 0        |
| Down | CCBE1    | 7 | 0.002002 | 326496 | 0.19495  | 0        |
| Down | TFCP2L1  | 7 | 4.28E-04 | 250206 | 0.20633  | 0        |
| Down | PALM3    | 7 | 0.00104  | 644144 | 0.248638 | 0        |
| Down | HYAL1    | 7 | 0.002205 | 417022 | 0.238754 | 0        |
| Down | ADAMTSL1 | 7 | 9.43E-04 | 207474 | 0.199906 | 0        |
| Down | SYTL5    | 6 | 0.001222 | 233628 | 0.223393 | 0        |
| Down | GSTA2    | 6 | 8.20E-04 | 333722 | 0.204948 | 0.133333 |
| Down | DPT      | 6 | 4.89E-04 | 261260 | 0.232265 | 0        |
| Down | MT1X     | 6 | 3.73E-04 | 229168 | 0.229285 | 0        |
| Down | BEX5     | 6 | 7.89E-04 | 108852 | 0.200715 | 0        |
| Down | ATP4B    | 6 | 0.002043 | 235970 | 0.235878 | 0        |
| Down | PLIN5    | 6 | 0.001333 | 771154 | 0.195629 | 0        |

---

---

|      |          |   |          |         |          |          |
|------|----------|---|----------|---------|----------|----------|
| Down | CCL28    | 6 | 0.001575 | 487862  | 0.211872 | 0        |
| Down | UPK1B    | 6 | 0.001572 | 934520  | 0.192781 | 0        |
| Down | MAMDC2   | 6 | 0.001576 | 318360  | 0.213296 | 0        |
| Down | SIGLEC11 | 6 | 5.99E-04 | 207770  | 0.228088 | 0        |
| Down | PLAC8    | 6 | 3.02E-04 | 225896  | 0.228527 | 0        |
| Down | RAB37    | 6 | 7.07E-04 | 123228  | 0.228967 | 0        |
| Down | LGALS9B  | 6 | 3.47E-04 | 189584  | 0.218307 | 0        |
| Down | ARL14    | 6 | 0.001956 | 1716690 | 0.182771 | 0        |
| Down | SH3BGRL2 | 6 | 0.001142 | 565738  | 0.239863 | 0        |
| Down | SST      | 6 | 0.002571 | 944178  | 0.209665 | 0.066667 |
| Down | SLC16A7  | 6 | 0.00134  | 493152  | 0.193116 | 0        |
| Down | FA2H     | 6 | 6.44E-04 | 190132  | 0.205889 | 0        |
| Down | CPA2     | 6 | 8.69E-04 | 220104  | 0.204187 | 0        |
| Down | DNER     | 6 | 5.68E-04 | 364110  | 0.227075 | 0        |
| Down | GDPD3    | 6 | 2.89E-04 | 143022  | 0.209949 | 0        |
| Down | KCNJ15   | 5 | 0.001063 | 395016  | 0.212383 | 0        |
| Down | GCKR     | 5 | 8.07E-04 | 358596  | 0.212613 | 0        |
| Down | HAS3     | 5 | 7.83E-04 | 180102  | 0.170839 | 0        |
| Down | IGFALS   | 5 | 8.48E-04 | 200704  | 0.198178 | 0        |
| Down | CCKAR    | 5 | 4.00E-08 | 2       | 0.18778  | 0.666667 |
| Down | TFF2     | 5 | 4.28E-04 | 128148  | 0.208808 | 0        |
| Down | SSTR1    | 5 | 8.16E-04 | 303142  | 0.175286 | 0.1      |
| Down | GPX3     | 5 | 7.83E-04 | 182594  | 0.193995 | 0        |
| Down | ORM2     | 5 | 1.57E-04 | 35318   | 0.220692 | 0.1      |
| Down | APOC3    | 5 | 4.14E-04 | 47088   | 0.233667 | 0.2      |
| Down | DDX60    | 5 | 8.81E-04 | 460534  | 0.218307 | 0        |
| Down | HPN      | 5 | 7.26E-04 | 310120  | 0.230194 | 0        |
| Down | GPT      | 5 | 8.29E-04 | 291602  | 0.206714 | 0        |
| Down | ODAM     | 5 | 8.57E-04 | 403252  | 0.23236  | 0        |
| Down | PAPPA2   | 5 | 8.40E-04 | 242380  | 0.196994 | 0        |
| Down | FMO5     | 5 | 8.78E-04 | 467960  | 0.215254 | 0        |
| Down | SLC16A9  | 5 | 8.61E-04 | 269782  | 0.220074 | 0        |
| Down | TMEM220  | 5 | 5.22E-04 | 290922  | 0.220854 | 0        |
| Down | GDPD2    | 5 | 0.001271 | 445450  | 0.207015 | 0        |
| Down | VILL     | 5 | 8.06E-04 | 419916  | 0.21569  | 0        |
| Down | ADH7     | 4 | 5.91E-05 | 29910   | 0.214631 | 0        |
| Down | CLIC6    | 4 | 8.08E-04 | 292454  | 0.186417 | 0        |
| Down | GALNT5   | 4 | 4.33E-04 | 155130  | 0.204366 | 0        |
| Down | KCNJ16   | 4 | 8.03E-04 | 105342  | 0.195794 | 0        |
| Down | CDHR2    | 4 | 0.001174 | 433218  | 0.180696 | 0        |
| Down | KCNE2    | 4 | 5.03E-04 | 75192   | 0.235954 | 0.166667 |
| Down | SULT1B1  | 4 | 4.79E-04 | 89616   | 0.204735 | 0        |
| Down | VSTM2A   | 4 | 7.96E-04 | 681826  | 0.169553 | 0        |

---

|      |          |   |          |        |          |          |
|------|----------|---|----------|--------|----------|----------|
| Down | RASEF    | 4 | 6.42E-04 | 174228 | 0.220463 | 0        |
| Down | GSTA3    | 4 | 5.10E-04 | 346118 | 0.238809 | 0.5      |
| Down | ADH1C    | 4 | 1        | 2      | 1        | 0        |
| Down | RIMS4    | 4 | 4.34E-04 | 216850 | 0.21482  | 0        |
| Down | PGC      | 4 | 3.15E-04 | 58062  | 0.251142 | 0        |
| Down | ENAM     | 4 | 1.68E-04 | 93264  | 0.210815 | 0        |
| Down | FSIP2    | 4 | 8.09E-04 | 202852 | 0.206338 | 0        |
| Down | SNORD22  | 4 | 3.76E-05 | 31698  | 0.209613 | 0        |
| Down | TM7SF2   | 4 | 4.65E-04 | 146028 | 0.214496 | 0        |
| Down | DMRTA1   | 4 | 9.92E-05 | 71054  | 0.21855  | 0        |
| Down | SCUBE2   | 4 | 3.91E-04 | 94424  | 0.187498 | 0        |
| Down | TMPRSS2  | 4 | 2.21E-05 | 4940   | 0.217944 | 0        |
| Down | SCARA5   | 4 | 5.52E-04 | 205628 | 0.215645 | 0        |
| Down | TMEM100  | 4 | 4.80E-04 | 116462 | 0.203253 | 0        |
| Down | PTGDR2   | 4 | 1        | 12     | 1        | 0        |
| Down | CAPN8    | 4 | 4.14E-04 | 137042 | 0.200597 | 0        |
| Down | ZNF385B  | 4 | 7.92E-04 | 439412 | 0.235313 | 0        |
| Down | RANBP3L  | 4 | 8.11E-04 | 270746 | 0.209966 | 0        |
| Down | C6orf58  | 4 | 4.97E-04 | 152308 | 0.220055 | 0        |
| Down | PLIN4    | 4 | 4.89E-05 | 42320  | 0.220444 | 0        |
| Down | ACSM1    | 4 | 7.89E-04 | 357944 | 0.177842 | 0        |
| Down | SLC7A8   | 3 | 7.83E-04 | 207170 | 0.191667 | 0        |
| Down | CLCNKA   | 3 | 0        | 0      | 0.18787  | 0        |
| Down | DUOX1    | 3 | 4.09E-04 | 206852 | 0.179214 | 0        |
| Down | APOBEC2  | 3 | 0        | 0      | 0.166808 | 0        |
| Down | ANXA10   | 3 | 4.21E-04 | 203664 | 0.234106 | 0        |
| Down | MT1H     | 3 | 3.32E-04 | 64160  | 0.191459 | 0        |
| Down | B4GALNT3 | 3 | 4.02E-04 | 211438 | 0.19202  | 0        |
| Down | SOX21    | 3 | 3.00E-08 | 2      | 0.240767 | 0.666667 |
| Down | NRG4     | 3 | 5.60E-04 | 49388  | 0.234267 | 0        |
| Down | RHBDL2   | 3 | 4.08E-04 | 193280 | 0.180946 | 0        |
| Down | GATA5    | 3 | 3.91E-04 | 70686  | 0.209613 | 0.333333 |
| Down | ADTRP    | 3 | 2.92E-05 | 10622  | 0.192425 | 0        |
| Down | PRSS8    | 3 | 4.57E-04 | 232278 | 0.22869  | 0        |
| Down | STYK1    | 3 | 2.69E-05 | 15578  | 0.218494 | 0        |
| Down | B3GAT1   | 3 | 0        | 0      | 0.18006  | 0        |
| Down | PSCA     | 3 | 6.95E-04 | 79296  | 0.241335 | 0        |
| Down | ADHFE1   | 3 | 8.07E-05 | 30016  | 0.199805 | 0        |
| Down | CLDN18   | 3 | 4.17E-04 | 121720 | 0.197679 | 0        |
| Down | LRRC66   | 3 | 1.72E-04 | 84034  | 0.221418 | 0        |
| Down | RNASE4   | 3 | 0        | 0      | 0.192324 | 0        |
| Down | KIAA0895 | 3 | 5.83E-05 | 24890  | 0.215581 | 0        |
| Down | CYP2C19  | 2 | 0        | 0      | 0.200274 | 1        |

|      |            |   |          |        |          |   |
|------|------------|---|----------|--------|----------|---|
| Down | FAM135B    | 2 | 1.11E-05 | 6158   | 0.192795 | 0 |
| Down | SLC9A4     | 2 | 3.51E-06 | 1708   | 0.202689 | 0 |
| Down | MT1G       | 2 | 9.97E-05 | 24412  | 0.172517 | 0 |
| Down | C22orf23   | 2 | 3.91E-04 | 43196  | 0.16031  | 0 |
| Down | DCAF12L1   | 2 | 1        | 2      | 1        | 0 |
| Down | ANO5       | 2 | 1.16E-04 | 17930  | 0.21883  | 0 |
| Down | TSPAN1     | 2 | 7.81E-06 | 4920   | 0.183381 | 0 |
| Down | ARHGEF37   | 2 | 3.91E-04 | 89488  | 0.215282 | 0 |
| Down | ELOVL6     | 2 | 3.91E-04 | 115044 | 0.204981 | 0 |
| Down | GPR155     | 2 | 5.21E-05 | 24726  | 0.208979 | 0 |
| Down | PM20D1     | 2 | 3.84E-06 | 2032   | 0.172669 | 0 |
| Down | ST6GALNAC1 | 2 | 6.04E-05 | 4124   | 0.250171 | 0 |
| Down | NWD1       | 2 | 3.91E-04 | 113138 | 0.197199 | 0 |
| Down | IGSF9      | 2 | 5.44E-05 | 22396  | 0.216375 | 0 |
| Down | SLC26A9    | 2 | 1.89E-04 | 21422  | 0.238342 | 0 |
| Down | TCN1       | 2 | 3.66E-05 | 43932  | 0.218596 | 0 |
| Down | ENTPD3     | 2 | 3.76E-05 | 15404  | 0.196516 | 0 |
| Down | MSMB       | 2 | 9.51E-05 | 49854  | 0.214992 | 0 |
| Down | CADM2      | 2 | 3.91E-04 | 72366  | 0.204858 | 0 |
| Down | MT1M       | 2 | 3.91E-04 | 145464 | 0.190028 | 0 |
| Down | MT1F       | 2 | 3.91E-04 | 224466 | 0.171194 | 0 |
| Down | IRX3       | 2 | 1.13E-05 | 6548   | 0.207007 | 0 |

**Table 8** miRNA - target gene interaction table

| Regulation | Target Genes | Degree | MicroRNA         | Regulation | Target Genes | Degree | MicroRNA     |
|------------|--------------|--------|------------------|------------|--------------|--------|--------------|
| Up         | MYB          | 24     | hsa-mir-103a-3p  | Down       | GATA6        | 207    | hsa-mir-4284 |
| Up         | SALL4        | 27     | hsa-mir-107      | Down       | SULT1B1      | 131    | hsa-mir-4643 |
| Up         | ARHGAP39     | 53     | hsa-mir-1179     | Down       | GLUL         | 126    | hsa-mir-4459 |
| Up         | CLDN4        | 73     | hsa-mir-1200     | Down       | ENPP5        | 114    | hsa-mir-8082 |
| Up         | CPS1         | 56     | hsa-mir-1200     | Down       | KLF2         | 107    | hsa-mir-5193 |
| Up         | OSMR         | 54     | hsa-mir-1208     | Down       | GPR155       | 94     | hsa-mir-3685 |
| Up         | IL2RA        | 50     | hsa-mir-1248     | Down       | LDHD         | 91     | hsa-mir-6077 |
| Up         | CDCA7        | 22     | hsa-mir-1254     | Down       | INSIG1       | 85     | hsa-mir-8073 |
| Up         | CDC25B       | 40     | hsa-mir-1268a    | Down       | F2RL1        | 85     | hsa-mir-3652 |
| Up         | BMP8A        | 38     | hsa-mir-1273f    | Down       | B3GALT5      | 78     | hsa-mir-4273 |
| Up         | ANKRD13B     | 42     | hsa-mir-1275     | Down       | NWD1         | 75     | hsa-mir-4532 |
| Up         | CAMK2N1      | 51     | hsa-mir-1281     | Down       | SHISA6       | 71     | hsa-mir-2278 |
| Up         | FGD6         | 41     | hsa-mir-1289     | Down       | ANGPTL3      | 70     | hsa-mir-1206 |
| Up         | ILDR1        | 29     | hsa-mir-1303     | Down       | FOLR1        | 69     | hsa-mir-4300 |
| Up         | COL4A1       | 42     | hsa-mir-1305     | Down       | SLC16A9      | 69     | hsa-mir-4500 |
| Up         | ITGA11       | 31     | hsa-mir-1321     | Down       | ENTPD5       | 66     | hsa-mir-4488 |
| Up         | TGFBI        | 22     | hsa-mir-1322     | Down       | CADM2        | 66     | hsa-mir-6074 |
| Up         | ITGBL1       | 18     | hsa-mir-138-2-3p | Down       | CCBE1        | 64     | hsa-mir-4277 |
| Up         | PLXNA1       | 58     | hsa-mir-1827     | Down       | CGNL1        | 61     | hsa-mir-4293 |
| Up         | POLQ         | 86     | hsa-mir-1912     | Down       | CMBL         | 60     | hsa-mir-2052 |
| Up         | PTGS2        | 20     | hsa-mir-199a-3p  | Down       | ACER2        | 59     | hsa-mir-4280 |
| Up         | SPON2        | 23     | hsa-mir-2110     | Down       | C1orf210     | 59     | hsa-mir-4469 |
| Up         | BCAT1        | 50     | hsa-mir-2113     | Down       | LIFR         | 55     | hsa-mir-8060 |
| Up         | FPR1         | 94     | hsa-mir-2117     | Down       | PRLR         | 54     | hsa-mir-4719 |
| Up         | DOCK4        | 19     | hsa-mir-23c      | Down       | METTTL7A     | 54     | hsa-mir-4432 |
| Up         | LY6E         | 26     | hsa-mir-2861     | Down       | ALDH6A1      | 54     | hsa-mir-5095 |
| Up         | SPSB1        | 45     | hsa-mir-297      | Down       | FSIP2        | 53     | hsa-mir-4641 |
| Up         | GREM1        | 18     | hsa-mir-300      | Down       | GALNT6       | 52     | hsa-mir-4770 |



|    |           |     |                  |      |          |    |                   |
|----|-----------|-----|------------------|------|----------|----|-------------------|
| Up | EMILIN2   | 31  | hsa-mir-302f     | Down | TSPAN1   | 51 | hsa-mir-3662      |
| Up | HAVCR2    | 30  | hsa-mir-3122     | Down | SLC5A5   | 51 | hsa-mir-4421      |
| Up | PLEKHS1   | 34  | hsa-mir-3135b    | Down | TMEM151A | 50 | hsa-mir-6069      |
| Up | TRIP13    | 27  | hsa-mir-3138     | Down | FBXL13   | 49 | hsa-mir-4435      |
| Up | ADAMTS14  | 19  | hsa-mir-3150a-3p | Down | SCIN     | 48 | hsa-mir-5572      |
| Up | SRPX2     | 40  | hsa-mir-3178     | Down | SLC1A2   | 47 | hsa-mir-3122      |
| Up | PIEZO1    | 17  | hsa-mir-3191-3p  | Down | B4GALNT3 | 47 | hsa-mir-3910      |
| Up | MARVELD1  | 47  | hsa-mir-3202     | Down | IL17REL  | 46 | hsa-mir-4303      |
| Up | MKI67     | 84  | hsa-mir-3646     | Down | ATP13A4  | 45 | hsa-mir-4480      |
| Up | ORC1      | 53  | hsa-mir-3666     | Down | PLCXD3   | 45 | hsa-mir-1248      |
| Up | PRRX1     | 17  | hsa-mir-378j     | Down | ANG      | 45 | hsa-mir-5693      |
| Up | PMEPA1    | 59  | hsa-mir-3909     | Down | DUSP19   | 45 | hsa-mir-1303      |
| Up | RCC2      | 135 | hsa-mir-3911     | Down | TMEM100  | 45 | hsa-mir-4427      |
| Up | ADAM12    | 23  | hsa-mir-3915     | Down | SLC26A9  | 44 | hsa-mir-4306      |
| Up | GEM       | 24  | hsa-mir-3920     | Down | DHCR24   | 43 | hsa-mir-4496      |
| Up | PLXDC2    | 58  | hsa-mir-3924     | Down | ACADL    | 42 | hsa-mir-30c-2-3p  |
| Up | PDPN      | 29  | hsa-mir-3929     | Down | FOXQ1    | 42 | hsa-mir-3666      |
| Up | INHBA     | 51  | hsa-mir-3973     | Down | PLLP     | 41 | hsa-mir-3910      |
| Up | CCND2     | 179 | hsa-mir-3976     | Down | ELOVL6   | 41 | hsa-mir-5703      |
| Up | SERPINE1  | 22  | hsa-mir-3977     | Down | APOC3    | 40 | hsa-mir-7703      |
| Up | ONCUT2    | 26  | hsa-mir-4251     | Down | RAB27A   | 40 | hsa-mir-3170      |
| Up | ITGB8     | 65  | hsa-mir-4263     | Down | PRKAA2   | 40 | hsa-mir-3166      |
| Up | FOXC1     | 106 | hsa-mir-4269     | Down | C1orf115 | 39 | hsa-mir-4451      |
| Up | E2F3      | 134 | hsa-mir-4271     | Down | CYB5A    | 39 | hsa-mir-600       |
| Up | MCM7      | 51  | hsa-mir-4283     | Down | PRSS8    | 38 | hsa-mir-4441      |
| Up | CTSB      | 26  | hsa-mir-4291     | Down | RIMS4    | 37 | hsa-mir-1976      |
| Up | IFITM1    | 38  | hsa-mir-4295     | Down | KIAA0895 | 37 | hsa-mir-4307      |
| Up | TNS4      | 41  | hsa-mir-4300     | Down | GPRC5C   | 36 | hsa-mir-8089      |
| Up | CELSR3    | 71  | hsa-mir-4301     | Down | EPB41L4B | 36 | hsa-mir-8077      |
| Up | BUB1      | 67  | hsa-mir-4302     | Down | MTRNR2L8 | 34 | hsa-mir-3159      |
| Up | CIQTNF6   | 36  | hsa-mir-4310     | Down | CYP2C19  | 34 | hsa-mir-5186      |
| Up | FSTL3     | 39  | hsa-mir-4314     | Down | GABRB3   | 34 | hsa-mir-298       |
| Up | OLR1      | 81  | hsa-mir-4316     | Down | AKR1B10  | 34 | hsa-mir-3611      |
| Up | GIN54     | 46  | hsa-mir-4318     | Down | SEC14L5  | 33 | hsa-mir-6131      |
| Up | MMP16     | 28  | hsa-mir-4318     | Down | RPRM     | 32 | hsa-mir-6090      |
| Up | FSTL1     | 38  | hsa-mir-4420     | Down | SLC9A4   | 32 | hsa-mir-8054      |
| Up | FMNL3     | 78  | hsa-mir-4421     | Down | KIAA1324 | 32 | hsa-mir-3135a     |
| Up | COL1A2    | 30  | hsa-mir-4424     | Down | FOXA1    | 32 | hsa-mir-4428      |
| Up | CAD       | 64  | hsa-mir-4426     | Down | ASB11    | 31 | hsa-mir-4803      |
| Up | FSCN1     | 99  | hsa-mir-4430     | Down | SLC9A1   | 31 | hsa-mir-644a      |
| Up | COL5A1    | 31  | hsa-mir-4434     | Down | SOWAHA   | 30 | hsa-mir-4999-3p   |
| Up | GDF15     | 23  | hsa-mir-4436a    | Down | ASAH2    | 30 | hsa-mir-4657      |
| Up | THBS1     | 95  | hsa-mir-4441     | Down | PTGDR2   | 30 | hsa-mir-5695      |
| Up | GPR176    | 18  | hsa-mir-4445-5p  | Down | PAIP2B   | 30 | hsa-mir-4287      |
| Up | MEX3A     | 95  | hsa-mir-4447     | Down | NRG4     | 30 | hsa-mir-4510      |
| Up | DGKH      | 52  | hsa-mir-4452     | Down | PLAC8    | 30 | hsa-mir-4481      |
| Up | LIF       | 47  | hsa-mir-4454     | Down | TFCP2L1  | 29 | hsa-mir-4468      |
| Up | CLDN1     | 35  | hsa-mir-4461     | Down | HAS3     | 29 | hsa-mir-520e      |
| Up | SERPINH1  | 77  | hsa-mir-4463     | Down | LIPH     | 27 | hsa-mir-6089      |
| Up | TTYH3     | 56  | hsa-mir-4468     | Down | SSTR1    | 26 | hsa-mir-4467      |
| Up | XRCC2     | 65  | hsa-mir-4469     | Down | SLPI     | 26 | hsa-mir-1827      |
| Up | CYP2W1    | 56  | hsa-mir-4472     | Down | ECHDC3   | 26 | hsa-mir-5697      |
| Up | ELN       | 22  | hsa-mir-4472     | Down | KLF4     | 26 | hsa-mir-663a      |
| Up | ARHGAP11A | 37  | hsa-mir-4478     | Down | GCNT4    | 25 | hsa-mir-3689c     |
| Up | TIMP1     | 22  | hsa-mir-4481     | Down | SERPINA4 | 25 | hsa-mir-6073      |
| Up | KIF2C     | 68  | hsa-mir-4484     | Down | RASSF6   | 25 | hsa-mir-6778-3p   |
| Up | LTBP2     | 33  | hsa-mir-4487     | Down | VSIG1    | 24 | hsa-mir-3198      |
| Up | CCNF      | 102 | hsa-mir-4492     | Down | RHBDL2   | 24 | hsa-mir-6773-3p   |
| Up | MYBL2     | 45  | hsa-mir-4498     | Down | CDH2     | 24 | hsa-mir-1244      |
| Up | ESPL1     | 34  | hsa-mir-4500     | Down | TM6SF2   | 23 | hsa-mir-6081      |
| Up | HIST3H2BB | 35  | hsa-mir-4507     | Down | STYK1    | 23 | hsa-mir-548u      |
| Up | LOXL2     | 26  | hsa-mir-4507     | Down | TTR      | 23 | hsa-mir-1273f     |
| Up | KIF23     | 59  | hsa-mir-4509     | Down | VSIG2    | 23 | hsa-mir-711       |
| Up | IGSF6     | 48  | hsa-mir-4514     | Down | TMEM38A  | 23 | hsa-mir-520b      |
| Up | SLC37A2   | 30  | hsa-mir-4514     | Down | APOA1    | 22 | hsa-mir-1305      |
| Up | GFPT2     | 23  | hsa-mir-4516     | Down | HS6ST3   | 22 | hsa-mir-147a      |
| Up | IL6       | 22  | hsa-mir-451a     | Down | KCNJ15   | 22 | hsa-mir-548ac     |
| Up | MCM10     | 21  | hsa-mir-4522     | Down | MYZAP    | 22 | hsa-mir-4801      |
| Up | ALDH1A3   | 32  | hsa-mir-4533     | Down | FUT9     | 21 | hsa-mir-664b-3p   |
| Up | COL12A1   | 28  | hsa-mir-4533     | Down | PSAPL1   | 21 | hsa-mir-550b-2-5p |

|    |          |     |                  |      |            |    |                    |
|----|----------|-----|------------------|------|------------|----|--------------------|
| Up | C3       | 118 | hsa-mir-4537     | Down | FGG        | 21 | hsa-mir-5008-5p    |
| Up | ODF2L    | 37  | hsa-mir-4540     | Down | MT1E       | 21 | hsa-mir-138-2-3p   |
| Up | F2RL2    | 62  | hsa-mir-4635     | Down | CLIC6      | 20 | hsa-mir-8055       |
| Up | IFFO2    | 51  | hsa-mir-4641     | Down | EDARADD    | 20 | hsa-mir-103a-2-5p  |
| Up | SLC2A3   | 47  | hsa-mir-4654     | Down | PTPRN2     | 20 | hsa-mir-4311       |
| Up | ICAM1    | 34  | hsa-mir-466      | Down | C4orf19    | 20 | hsa-mir-4430       |
| Up | COL1A1   | 97  | hsa-mir-4660     | Down | HRH2       | 20 | hsa-mir-6129       |
| Up | VCAN     | 24  | hsa-mir-4666b    | Down | CD36       | 20 | hsa-mir-3190-5p    |
| Up | ITGA5    | 27  | hsa-mir-4667-3p  | Down | SLC4A4     | 19 | hsa-mir-6747-3p    |
| Up | AHNAK2   | 16  | hsa-mir-4670-3p  | Down | SLC15A1    | 19 | hsa-mir-4649-3p    |
| Up | STC2     | 90  | hsa-mir-4689     | Down | IGSF9      | 19 | hsa-mir-548x-3p    |
| Up | SPARC    | 21  | hsa-mir-4693-3p  | Down | ANO7       | 19 | hsa-mir-6852-5p    |
| Up | THY1     | 32  | hsa-mir-4706     | Down | ALDOC      | 19 | hsa-mir-2116-3p    |
| Up | CLSPN    | 73  | hsa-mir-4710     | Down | GPT2       | 19 | hsa-mir-3911       |
| Up | WDR72    | 23  | hsa-mir-4719     | Down | SOX2       | 19 | hsa-mir-1181       |
| Up | THBS2    | 81  | hsa-mir-4771     | Down | SLC28A2    | 18 | hsa-mir-4705       |
| Up | MDF1     | 36  | hsa-mir-4773     | Down | LTF        | 18 | hsa-mir-4768-5p    |
| Up | PLA2G7   | 18  | hsa-mir-4775     | Down | C6         | 18 | hsa-mir-6511a-3p   |
| Up | RHBDF2   | 40  | hsa-mir-4779     | Down | FGB        | 18 | hsa-mir-3155b      |
| Up | PXDN     | 27  | hsa-mir-4780     | Down | HAPLN1     | 18 | hsa-mir-548an      |
| Up | CLSTN3   | 17  | hsa-mir-4801     | Down | SLC9A3     | 17 | hsa-mir-4749-5p    |
| Up | CBX2     | 80  | hsa-mir-4803     | Down | FAM174B    | 17 | hsa-mir-5006-3p    |
| Up | GNB4     | 27  | hsa-mir-5001-3p  | Down | CYP3A5     | 17 | hsa-mir-599        |
| Up | SLC11A1  | 19  | hsa-mir-5006-3p  | Down | PAQR8      | 17 | hsa-mir-6881-3p    |
| Up | LRP8     | 18  | hsa-mir-5011-5p  | Down | ADAMTSL1   | 17 | hsa-mir-3689d      |
| Up | PLK1     | 40  | hsa-mir-5047     | Down | PLIN5      | 17 | hsa-mir-4418       |
| Up | NCR3LG1  | 54  | hsa-mir-5087     | Down | HHLA2      | 16 | hsa-mir-3133       |
| Up | PLXDC1   | 20  | hsa-mir-5091     | Down | CAPN13     | 16 | hsa-mir-549a       |
| Up | HOXA10   | 83  | hsa-mir-5093     | Down | RASEF      | 16 | hsa-mir-5700       |
| Up | LIPG     | 89  | hsa-mir-5096     | Down | B3GNT7     | 15 | hsa-mir-7975       |
| Up | KIF18B   | 36  | hsa-mir-5100     | Down | TPD52L1    | 14 | hsa-mir-8066       |
| Up | HOXA13   | 111 | hsa-mir-5190     | Down | SLC2A12    | 14 | hsa-mir-502-3p     |
| Up | SLC43A3  | 60  | hsa-mir-5191     | Down | DUOX2      | 14 | hsa-mir-6749-3p    |
| Up | KRT80    | 65  | hsa-mir-5192     | Down | CIDEC      | 14 | hsa-mir-548aw      |
| Up | PGM2L1   | 117 | hsa-mir-5193     | Down | CTSE       | 14 | hsa-mir-3650       |
| Up | MFAP2    | 24  | hsa-mir-520b     | Down | NKX6-2     | 13 | hsa-mir-6889-5p    |
| Up | TOP2A    | 17  | hsa-mir-520d-5p  | Down | TMEM220    | 13 | hsa-mir-7161-5p    |
| Up | ATAD2    | 35  | hsa-mir-520e     | Down | C14orf180  | 13 | hsa-mir-1255b-2-3p |
| Up | MMP9     | 21  | hsa-mir-524-5p   | Down | GCNT1      | 13 | hsa-mir-2682-3p    |
| Up | ATP11A   | 28  | hsa-mir-526a     | Down | FOXA2      | 13 | hsa-mir-450a-1-3p  |
| Up | DIO2     | 21  | hsa-mir-544a     | Down | SCNN1G     | 12 | hsa-mir-433-3p     |
| Up | CKAP2    | 17  | hsa-mir-548ah-5p | Down | TTC39A     | 12 | hsa-mir-1273g-3p   |
| Up | RAB31    | 30  | hsa-mir-548an    | Down | SIGLEC11   | 12 | hsa-mir-520h       |
| Up | CDC6     | 28  | hsa-mir-548ap-3p | Down | ESRRG      | 12 | hsa-mir-4492       |
| Up | EPHB1    | 18  | hsa-mir-548aw    | Down | UNC5D      | 12 | hsa-mir-527        |
| Up | CD84     | 33  | hsa-mir-548s     | Down | SLC16A7    | 12 | hsa-mir-759        |
| Up | WISP1    | 27  | hsa-mir-557      | Down | PBLD       | 12 | hsa-mir-374a-5p    |
| Up | GLI2     | 35  | hsa-mir-5572     | Down | PROM2      | 11 | hsa-mir-6134       |
| Up | COL8A1   | 39  | hsa-mir-564      | Down | TRNP1      | 11 | hsa-mir-4793-3p    |
| Up | NT5DC3   | 85  | hsa-mir-5680     | Down | PTGER3     | 11 | hsa-mir-5003-3p    |
| Up | FAM83D   | 40  | hsa-mir-5691     | Down | C1orf116   | 11 | hsa-mir-581        |
| Up | FOKK1    | 259 | hsa-mir-5693     | Down | ARHGEF37   | 11 | hsa-mir-6780a-3p   |
| Up | ST3GAL2  | 22  | hsa-mir-5693     | Down | ST6GALNAC1 | 11 | hsa-mir-3155a      |
| Up | GPX8     | 25  | hsa-mir-5700     | Down | SLC26A7    | 11 | hsa-mir-4659b-3p   |
| Up | APLN     | 30  | hsa-mir-5708     | Down | REG3A      | 11 | hsa-mir-2277-3p    |
| Up | TCOF1    | 28  | hsa-mir-588      | Down | RPS6KA6    | 11 | hsa-mir-4687-3p    |
| Up | SLC39A10 | 27  | hsa-mir-591      | Down | ADAM28     | 11 | hsa-mir-23c        |
| Up | GAS7     | 18  | hsa-mir-599      | Down | CKB        | 11 | hsa-mir-551a       |
| Up | ADAMTS9  | 24  | hsa-mir-603      | Down | SLC25A4    | 11 | hsa-mir-7112-3p    |
| Up | IGF2BP3  | 52  | hsa-mir-6069     | Down | FNDC5      | 10 | hsa-mir-4659a-3p   |
| Up | TNFAIP2  | 24  | hsa-mir-6069     | Down | AADAC      | 10 | hsa-mir-1179       |
| Up | IGSF9B   | 30  | hsa-mir-607      | Down | HOMER2     | 10 | hsa-mir-922        |
| Up | DUSP10   | 39  | hsa-mir-6072     | Down | RIPK4      | 10 | hsa-mir-5003-5p    |
| Up | ZNF703   | 115 | hsa-mir-6074     | Down | B3GNT6     | 9  | hsa-mir-3909       |
| Up | LPCAT1   | 29  | hsa-mir-6077     | Down | IRX2       | 9  | hsa-mir-6808-3p    |
| Up | PODXL    | 69  | hsa-mir-6079     | Down | BCAS1      | 9  | hsa-mir-933        |
| Up | ENTPD1   | 64  | hsa-mir-6079     | Down | PRIMA1     | 9  | hsa-mir-5011-5p    |
| Up | CYP2B6   | 43  | hsa-mir-608      | Down | TMEM92     | 9  | hsa-mir-4713-5p    |
| Up | CCDC80   | 135 | hsa-mir-6083     | Down | MUC1       | 9  | hsa-mir-145-5p     |
| Up | PLEKHG2  | 94  | hsa-mir-6127     | Down | ESRRB      | 9  | hsa-mir-6769b-5p   |

|    |          |    |                  |      |          |   |                  |
|----|----------|----|------------------|------|----------|---|------------------|
| Up | ABCA1    | 19 | hsa-mir-613      | Down | ERBB4    | 9 | hsa-mir-221-3p   |
| Up | VASH1    | 49 | hsa-mir-6131     | Down | KIF1A    | 9 | hsa-mir-652-3p   |
| Up | IFITM3   | 35 | hsa-mir-6132     | Down | EEF1A2   | 8 | hsa-mir-663b     |
| Up | NFAM1    | 40 | hsa-mir-617      | Down | RAB37    | 8 | hsa-mir-4673     |
| Up | NOTCH1   | 44 | hsa-mir-623      | Down | ID1      | 8 | hsa-mir-100-5p   |
| Up | KNTC1    | 27 | hsa-mir-632      | Down | XYLT2    | 8 | hsa-mir-18a-5p   |
| Up | CEP170   | 37 | hsa-mir-633      | Down | BMP5     | 7 | hsa-mir-1266-3p  |
| Up | F2R      | 37 | hsa-mir-640      | Down | ZBTB7C   | 7 | hsa-mir-4650-5p  |
| Up | GPR161   | 22 | hsa-mir-6501-5p  | Down | MTRNR2L2 | 7 | hsa-mir-299-5p   |
| Up | SNX10    | 20 | hsa-mir-6507-5p  | Down | PRDM16   | 7 | hsa-mir-101-3p   |
| Up | MTHFD1L  | 31 | hsa-mir-6509-3p  | Down | NCAM1    | 7 | hsa-mir-200c-3p  |
| Up | VGLL3    | 18 | hsa-mir-6512-3p  | Down | DSC2     | 7 | hsa-mir-25-3p    |
| Up | COL18A1  | 40 | hsa-mir-661      | Down | DPCR1    | 7 | hsa-mir-24-1-5p  |
| Up | KIF21B   | 23 | hsa-mir-663b     | Down | HPGD     | 7 | hsa-mir-664a-3p  |
| Up | FAR2     | 18 | hsa-mir-6715b-3p | Down | ADAMTS15 | 6 | hsa-mir-4540     |
| Up | HJURP    | 24 | hsa-mir-6720-3p  | Down | KK       | 6 | hsa-mir-31-3p    |
| Up | TRIM29   | 20 | hsa-mir-6746-5p  | Down | CXCL14   | 5 | hsa-mir-2276-3p  |
| Up | IFI44L   | 19 | hsa-mir-6809-3p  | Down | ENAM     | 5 | hsa-mir-15a-3p   |
| Up | PADI2    | 24 | hsa-mir-6826-3p  | Down | GALNT5   | 5 | hsa-mir-651-3p   |
| Up | ANTXR1   | 21 | hsa-mir-6837-3p  | Down | FGA      | 5 | hsa-mir-409-3p   |
| Up | OMD      | 31 | hsa-mir-6843-3p  | Down | RORC     | 5 | hsa-mir-1236-3p  |
| Up | BICC1    | 18 | hsa-mir-7110-3p  | Down | MAOA     | 5 | hsa-mir-5000-5p  |
| Up | EPHB2    | 35 | hsa-mir-7150     | Down | POU2AF1  | 5 | hsa-mir-210-3p   |
| Up | NCAPH    | 31 | hsa-mir-759      | Down | CYSTM1   | 5 | hsa-mir-183-3p   |
| Up | P2RX7    | 39 | hsa-mir-764      | Down | UBE2QL1  | 4 | hsa-mir-2909     |
| Up | HEYL     | 83 | hsa-mir-7641     | Down | KLHDC7A  | 4 | hsa-mir-4662a-3p |
| Up | CLEC7A   | 33 | hsa-mir-7977     | Down | FAM135B  | 4 | hsa-mir-2114-3p  |
| Up | SEMA6B   | 29 | hsa-mir-8052     | Down | GGT6     | 4 | hsa-mir-501-5p   |
| Up | PDE3A    | 84 | hsa-mir-8066     | Down | SLC7A8   | 4 | hsa-mir-4644     |
| Up | PKMYT1   | 39 | hsa-mir-8078     | Down | IGFBP2   | 4 | hsa-mir-491-3p   |
| Up | ATAD5    | 51 | hsa-mir-8080     | Down | SPTSSB   | 4 | hsa-mir-3606-5p  |
| Up | ADAMTS4  | 77 | hsa-mir-8081     | Down | CYP2C8   | 4 | hsa-mir-1178-3p  |
| Up | GDPD5    | 31 | hsa-mir-922      | Down | RAB27B   | 4 | hsa-mir-193a-3p  |
| Up | STIL     | 16 | hsa-mir-4266     | Down | OXCT1    | 4 | hsa-mir-155-5p   |
| Up | GRIN2D   | 16 | hsa-mir-6804-5p  | Down | GCNT2    | 4 | hsa-mir-98-5p    |
| Up | LRRC32   | 16 | hsa-mir-378g     | Down | CXADR    | 4 | hsa-mir-342-3p   |
| Up | MXRA8    | 16 | hsa-mir-1295b-5p | Down | CA2      | 4 | hsa-mir-99b-3p   |
| Up | SCARF2   | 16 | hsa-mir-6081     | Down | SELENBP1 | 4 | hsa-mir-20a-5p   |
| Up | NOP2     | 15 | hsa-mir-296-3p   | Down | SPDEF    | 4 | hsa-let-7c-5p    |
| Up | KIF14    | 15 | hsa-mir-4523     | Down | LEPR     | 3 | hsa-mir-200c-3p  |
| Up | ANGPTL2  | 15 | hsa-mir-548ac    | Down | CYP2C9   | 3 | hsa-mir-143-3p   |
| Up | CDX2     | 15 | hsa-mir-6747-3p  | Down | OASL     | 3 | hsa-mir-146a-5p  |
| Up | TREM1    | 15 | hsa-mir-421      | Down | TFF1     | 3 | hsa-mir-423-5p   |
| Up | SERPINB5 | 14 | hsa-mir-4762-5p  | Down | PTPRZ1   | 3 | hsa-mir-181a-5p  |
| Up | SELE     | 14 | hsa-mir-3065-5p  | Down | CCKBR    | 3 | hsa-mir-148a-3p  |
| Up | FOXM1    | 14 | hsa-mir-24-1-5p  | Down | RNASE4   | 3 | hsa-mir-215-5p   |
| Up | PLEKHG4  | 14 | hsa-mir-6502-5p  | Down | MT1F     | 3 | hsa-mir-219a-5p  |
| Up | TDRD6    | 14 | hsa-mir-5088-3p  | Down | SH3GL2   | 3 | hsa-mir-107      |
| Up | PLEK     | 14 | hsa-mir-3180-5p  | Down | NR0B2    | 3 | hsa-mir-141-3p   |
| Up | CPXM2    | 14 | hsa-mir-6877-3p  | Down | S100P    | 3 | hsa-mir-24-3p    |
| Up | ECT2     | 13 | hsa-mir-4255     | Down | TST      | 3 | hsa-mir-548b-3p  |
| Up | ITGAX    | 13 | hsa-mir-6087     | Down | TM7SF2   | 2 | hsa-mir-193b-3p  |
| Up | CACNA1E  | 13 | hsa-mir-541-3p   | Down | APLP1    | 2 | hsa-mir-484      |
| Up | COL5A3   | 13 | hsa-mir-642a-5p  | Down | MIA2     | 2 | hsa-mir-155-5p   |
| Up | RELT     | 12 | hsa-mir-6849-3p  | Down | ALDOB    | 2 | hsa-mir-378a-3p  |
| Up | CENPF    | 12 | hsa-mir-1226-3p  | Down | PXMP2    | 2 | hsa-mir-935      |
| Up | COL4A2   | 12 | hsa-mir-210-3p   | Down | CLDN23   | 2 | hsa-mir-222-3p   |
| Up | PLXNC1   | 12 | hsa-mir-7853-5p  | Down | ALDH1A1  | 2 | hsa-mir-140-5p   |
| Up | BOC      | 12 | hsa-mir-4659a-5p | Down | SULT1C2  | 2 | hsa-mir-7-5p     |
| Up | DPYSL3   | 12 | hsa-mir-3667-3p  | Down | ZNF385B  | 2 | hsa-mir-215-5p   |
| Up | PARVG    | 12 | hsa-mir-6804-3p  | Down | FAM189A2 | 2 | hsa-mir-192-5p   |
| Up | CRABP2   | 12 | hsa-mir-3141     | Down | RAP1GAP  | 2 | hsa-mir-215-5p   |
| Up | CLDN7    | 12 | hsa-mir-3670     | Down | MT1X     | 2 | hsa-mir-1225-3p  |
| Up | COL3A1   | 11 | hsa-mir-455-3p   | Down | ENTPD3   | 2 | hsa-mir-192-5p   |
| Up | KIF26B   | 11 | hsa-mir-501-5p   | Down | COL4A6   | 2 | hsa-mir-29b-3p   |
| Up | MMP14    | 11 | hsa-mir-133b     | Down | COL2A1   | 2 | hsa-mir-106a-5p  |
| Up | FBN1     | 11 | hsa-mir-133a-3p  | Down | AQP4     | 2 | hsa-mir-320a     |
| Up | NNMT     | 11 | hsa-mir-6500-3p  | Down | AKR1C3   | 2 | hsa-mir-98-5p    |
| Up | SULF2    | 11 | hsa-mir-5585-3p  | Down | DDX60    | 2 | hsa-mir-1-3p     |
| Up | LAMA5    | 11 | hsa-mir-1909-3p  | Down | HGD      | 2 | hsa-mir-26b-5p   |

|    |            |    |                   |      |          |   |                 |
|----|------------|----|-------------------|------|----------|---|-----------------|
| Up | TNC        | 11 | hsa-mir-513a-3p   | Down | CA9      | 2 | hsa-mir-98-5p   |
| Up | SLC24A3    | 11 | hsa-mir-548aa     | Down | SULT2A1  | 2 | hsa-mir-24-3p   |
| Up | BGN        | 11 | hsa-mir-4311      | Down | MTIM     | 2 | hsa-mir-26b-5p  |
| Up | UBE2C      | 10 | hsa-mir-631       | Down | PDGFD    | 2 | hsa-mir-21-5p   |
| Up | EGR2       | 10 | hsa-mir-150-5p    | Down | RNASE1   | 2 | hsa-mir-19b-3p  |
| Up | PDGFRB     | 10 | hsa-mir-224-5p    | Down | AMPD1    | 2 | hsa-mir-10a-5p  |
| Up | MCM2       | 10 | hsa-mir-1296-5p   | Down | IRX5     | 1 | hsa-mir-4497    |
| Up | ENC1       | 10 | hsa-mir-5584-5p   | Down | CLDN18   | 1 | hsa-mir-1303    |
| Up | RTKN2      | 10 | hsa-mir-6876-5p   | Down | ATP4A    | 1 | hsa-mir-1289    |
| Up | CDH13      | 10 | hsa-mir-3074-5p   | Down | PTGR1    | 1 | hsa-mir-522-3p  |
| Up | CD109      | 10 | hsa-mir-103a-2-5p | Down | ITPKA    | 1 | hsa-mir-193b-3p |
| Up | SH3PXD2B   | 10 | hsa-mir-6749-3p   | Down | AKR1C2   | 1 | hsa-mir-193b-3p |
| Up | HMCN1      | 10 | hsa-mir-1299      | Down | GRIA4    | 1 | hsa-mir-484     |
| Up | TMEM158    | 10 | hsa-mir-548z      | Down | PLIN4    | 1 | hsa-mir-335-5p  |
| Up | ZNF469     | 10 | hsa-mir-151b      | Down | MUC5B    | 1 | hsa-mir-335-5p  |
| Up | FANCD2     | 9  | hsa-mir-618       | Down | LGALS9C  | 1 | hsa-mir-335-5p  |
| Up | LAPTM5     | 9  | hsa-mir-4680-3p   | Down | STX19    | 1 | hsa-mir-335-5p  |
| Up | NOTCH3     | 9  | hsa-mir-206       | Down | FMO6P    | 1 | hsa-mir-335-5p  |
| Up | FCGR3B     | 9  | hsa-mir-6740-3p   | Down | ENHO     | 1 | hsa-mir-335-5p  |
| Up | KIAA1755   | 9  | hsa-mir-4756-3p   | Down | C6orf58  | 1 | hsa-mir-335-5p  |
| Up | C2CD4A     | 8  | hsa-mir-4659b-3p  | Down | BEX5     | 1 | hsa-mir-335-5p  |
| Up | FADS2      | 8  | hsa-mir-500a-3p   | Down | SCARA5   | 1 | hsa-mir-335-5p  |
| Up | CTHRC1     | 8  | hsa-mir-630       | Down | LGALS9B  | 1 | hsa-mir-335-5p  |
| Up | MYH10      | 8  | hsa-mir-106b-3p   | Down | COL6A5   | 1 | hsa-mir-335-5p  |
| Up | FN1        | 8  | hsa-mir-200c-3p   | Down | GATA5    | 1 | hsa-mir-335-5p  |
| Up | MYBBP1A    | 8  | hsa-mir-3186-5p   | Down | TRIM50   | 1 | hsa-mir-335-5p  |
| Up | ROBO2      | 8  | hsa-mir-514a-3p   | Down | ANKRD22  | 1 | hsa-mir-335-5p  |
| Up | WDR62      | 8  | hsa-mir-149-5p    | Down | ACSM1    | 1 | hsa-mir-335-5p  |
| Up | C1R        | 8  | hsa-mir-518c-5p   | Down | AQP10    | 1 | hsa-mir-335-5p  |
| Up | TRIO       | 7  | hsa-mir-92b-3p    | Down | FRMD1    | 1 | hsa-mir-335-5p  |
| Up | TUBB3      | 7  | hsa-mir-340-5p    | Down | CDHR2    | 1 | hsa-mir-335-5p  |
| Up | PDLIM7     | 7  | hsa-mir-30a-5p    | Down | FAM3B    | 1 | hsa-mir-335-5p  |
| Up | PLAU       | 7  | hsa-mir-23b-3p    | Down | VILL     | 1 | hsa-mir-335-5p  |
| Up | COL5A2     | 7  | hsa-mir-29c-3p    | Down | SCG3     | 1 | hsa-mir-335-5p  |
| Up | CD248      | 7  | hsa-mir-758-3p    | Down | GNMT     | 1 | hsa-mir-335-5p  |
| Up | TGM2       | 7  | hsa-mir-155-5p    | Down | SOSTDC1  | 1 | hsa-mir-335-5p  |
| Up | NEK2       | 7  | hsa-mir-4668-5p   | Down | KLK11    | 1 | hsa-mir-335-5p  |
| Up | MMP7       | 7  | hsa-mir-203a-5p   | Down | FBP2     | 1 | hsa-mir-335-5p  |
| Up | FBXO32     | 7  | hsa-mir-608       | Down | SEMA3B   | 1 | hsa-mir-335-5p  |
| Up | MSR1       | 7  | hsa-mir-410-5p    | Down | CLEC3B   | 1 | hsa-mir-335-5p  |
| Up | FCGR2A     | 7  | hsa-mir-29b-2-5p  | Down | TFF2     | 1 | hsa-mir-335-5p  |
| Up | ESM1       | 7  | hsa-mir-1260a     | Down | MUC6     | 1 | hsa-mir-335-5p  |
| Up | ASPM       | 6  | hsa-mir-193b-3p   | Down | FOXA3    | 1 | hsa-mir-335-5p  |
| Up | ACTN1      | 6  | hsa-mir-16-5p     | Down | GUCA2B   | 1 | hsa-mir-335-5p  |
| Up | HTRA1      | 6  | hsa-mir-6774-5p   | Down | GC       | 1 | hsa-mir-335-5p  |
| Up | RAI14      | 6  | hsa-mir-21-5p     | Down | AQP5     | 1 | hsa-mir-335-5p  |
| Up | PRR5L      | 6  | hsa-mir-502-5p    | Down | ADH7     | 1 | hsa-mir-335-5p  |
| Up | DKK2       | 6  | hsa-mir-221-3p    | Down | CCL28    | 1 | hsa-mir-148b-3p |
| Up | IL11       | 6  | sa-mir-211-5p     | Down | KCNJ16   | 1 | hsa-mir-148b-3p |
| Up | HIST1H3G   | 6  | hsa-mir-7856-5p   | Down | DPT      | 1 | hsa-mir-148b-3p |
| Up | LEF1       | 6  | hsa-mir-449a      | Down | KLF15    | 1 | hsa-mir-376a-3p |
| Up | SPP1       | 6  | hsa-mir-299-5p    | Down | CHGB     | 1 | hsa-mir-375     |
| Up | LGR5       | 6  | hsa-mir-142-3p    | Down | SH3BGRL2 | 1 | hsa-mir-195-5p  |
| Up | TFEC       | 6  | hsa-mir-769-5p    | Down | ARL4     | 1 | hsa-mir-186-5p  |
| Up | CDCA2      | 6  | hsa-mir-3613-3p   | Down | PTPRR    | 1 | hsa-mir-186-5p  |
| Up | FKBP10     | 5  | hsa-mir-132-3p    | Down | ALDH3A1  | 1 | hsa-mir-186-5p  |
| Up | CALD1      | 5  | hsa-mir-15a-5p    | Down | KCNQ1    | 1 | hsa-mir-133a-3p |
| Up | KIF20A     | 5  | hsa-mir-124-3p    | Down | B3GAT1   | 1 | hsa-mir-132-3p  |
| Up | CSGALNACT2 | 5  | hsa-mir-377-3p    | Down | AZGP1    | 1 | hsa-mir-128-3p  |
| Up | COL10A1    | 5  | hsa-mir-29b-3p    | Down | UGT1A10  | 1 | hsa-mir-124-3p  |
| Up | NOX4       | 5  | hsa-mir-9-5p      | Down | COL17A1  | 1 | hsa-mir-124-3p  |
| Up | ANLN       | 5  | hsa-mir-497-5p    | Down | CYP3A4   | 1 | hsa-mir-27b-3p  |
| Up | ZNF462     | 5  | hsa-mir-330-5p    | Down | SYTL2    | 1 | hsa-mir-1-3p    |
| Up | NTM        | 5  | hsa-mir-340-5p    | Down | RGN      | 1 | hsa-mir-1-3p    |
| Up | MMP1       | 5  | hsa-mir-526b-3p   | Down | LYPD6B   | 1 | hsa-mir-218-5p  |
| Up | SPHK1      | 5  | hsa-mir-125b-5p   | Down | SUSD4    | 1 | hsa-mir-218-5p  |
| Up | PLBD2      | 5  | hsa-mir-3607-3p   | Down | MYOC     | 1 | hsa-mir-204-5p  |
| Up | HEPH       | 5  | hsa-mir-548c-3p   | Down | ME1      | 1 | hsa-mir-34a-5p  |
| Up | RRP12      | 4  | hsa-mir-24-3p     | Down | CYP2S1   | 1 | hsa-mir-147a    |
| Up | TNFRSF11B  | 4  | hsa-mir-181b-5p   | Down | HPN      | 1 | hsa-mir-197-3p  |

|    |          |   |                  |      |        |   |                 |
|----|----------|---|------------------|------|--------|---|-----------------|
| Up | BUB1B    | 4 | hsa-mir-22-3p    | Down | MAMDC2 | 1 | hsa-mir-196a-5p |
| Up | ABCD1    | 4 | hsa-mir-615-3p   | Down | CHGA   | 1 | hsa-mir-107     |
| Up | COL15A1  | 4 | hsa-mir-29b-3p   | Down | HBB    | 1 | hsa-mir-92a-3p  |
| Up | SFRP4    | 4 | hsa-mir-103a-3p  | Down | GPX3   | 1 | hsa-mir-92a-3p  |
| Up | KIF4A    | 4 | hsa-mir-222-3p   | Down | EYA2   | 1 | hsa-mir-30a-5p  |
| Up | SERPINB9 | 4 | hsa-mir-127-3p   | Down | GKN1   | 1 | hsa-mir-30a-5p  |
| Up | PIK3AP1  | 4 | hsa-mir-32-5p    | Down | SMPD3  | 1 | hsa-mir-26b-5p  |
| Up | BMP1     | 4 | hsa-mir-218-5p   | Down | ODAM   | 1 | hsa-mir-26b-5p  |
| Up | MMP11    | 4 | hsa-mir-135a-5p  | Down | CAPN9  | 1 | hsa-mir-26b-5p  |
| Up | EDNRA    | 4 | hsa-mir-200c-3p  | Down | IL1R2  | 1 | hsa-mir-26b-5p  |
| Up | CDH11    | 4 | hsa-mir-27b-3p   | Down | TCN1   | 1 | hsa-mir-26b-5p  |
| Up | ADCY3    | 4 | hsa-mir-1296-5p  | Down | GSTA1  | 1 | hsa-mir-26b-5p  |
| Up | VIL1     | 4 | hsa-mir-2054     | Down | HYAL1  | 1 | hsa-mir-25-3p   |
| Up | TNFAIP6  | 4 | hsa-mir-19b-1-5p | Down | MRAP2  | 1 | hsa-mir-21-5p   |
| Up | NID2     | 3 | hsa-mir-181d-5p  | Down | SLC9A2 | 1 | hsa-mir-16-5p   |
| Up | SERPINE2 | 3 | hsa-mir-30e-3p   | Down | MAP7D2 | 1 | hsa-mir-505-5p  |
| Up | MRC2     | 3 | hsa-mir-10a-5p   | Down | ANO5   | 1 | hsa-mir-432-5p  |
| Up | PTPRO    | 3 | hsa-mir-20a-5p   |      |        |   |                 |
| Up | CDCA5    | 3 | hsa-mir-18b-5p   |      |        |   |                 |
| Up | CXCL9    | 3 | hsa-mir-34a-5p   |      |        |   |                 |
| Up | CXCL6    | 3 | hsa-mir-140-3p   |      |        |   |                 |
| Up | ASPN     | 3 | hsa-mir-124-3p   |      |        |   |                 |
| Up | MMP3     | 3 | hsa-mir-138-5p   |      |        |   |                 |
| Up | TEAD4    | 3 | hsa-mir-512-5p   |      |        |   |                 |
| Up | APOE     | 3 | hsa-mir-199a-3p  |      |        |   |                 |
| Up | AJUBA    | 3 | hsa-mir-196b-5p  |      |        |   |                 |
| Up | BCL2A1   | 3 | hsa-mir-146a-5p  |      |        |   |                 |
| Up | CXCL1    | 3 | hsa-mir-1-3p     |      |        |   |                 |
| Up | ANGPT2   | 3 | hsa-mir-542-3p   |      |        |   |                 |
| Up | CDH3     | 3 | hsa-mir-9-5p     |      |        |   |                 |
| Up | EXO1     | 3 | hsa-mir-375      |      |        |   |                 |
| Up | CHTF18   | 3 | hsa-mir-378a-5p  |      |        |   |                 |
| Up | LILRB4   | 2 | hsa-mir-193b-3p  |      |        |   |                 |
| Up | CCR1     | 2 | hsa-mir-21-5p    |      |        |   |                 |
| Up | MSLN     | 2 | hsa-mir-335-5p   |      |        |   |                 |
| Up | CCL3     | 2 | hsa-mir-223-3p   |      |        |   |                 |
| Up | PKDCC    | 2 | hsa-mir-25-3p    |      |        |   |                 |
| Up | C5AR1    | 2 | hsa-mir-26b-5p   |      |        |   |                 |
| Up | MGP      | 2 | hsa-mir-335-5p   |      |        |   |                 |
| Up | GPNMB    | 2 | hsa-mir-508-5p   |      |        |   |                 |
| Up | ADAMTS12 | 2 | hsa-mir-26b-5p   |      |        |   |                 |
| Up | SFRP2    | 2 | hsa-mir-29a-3p   |      |        |   |                 |
| Up | CHN1     | 2 | hsa-mir-1301-3p  |      |        |   |                 |
| Up | COL7A1   | 2 | hsa-mir-29b-3p   |      |        |   |                 |
| Up | HOXB9    | 2 | hsa-mir-215-5p   |      |        |   |                 |
| Up | UPP1     | 2 | hsa-mir-192-5p   |      |        |   |                 |
| Up | WNT2     | 2 | hsa-mir-199a-5p  |      |        |   |                 |
| Up | NOD1     | 2 | hsa-mir-1250-3p  |      |        |   |                 |
| Up | LZTS1    | 2 | hsa-mir-214-3p   |      |        |   |                 |
| Up | PRKDC    | 2 | hsa-mir-101-5p   |      |        |   |                 |
| Up | ABCA13   | 2 | hsa-mir-148b-3p  |      |        |   |                 |
| Up | IGFBP7   | 2 | hsa-mir-124-3p   |      |        |   |                 |
| Up | SULF1    | 2 | hsa-mir-516a-3p  |      |        |   |                 |
| Up | HTRA3    | 2 | hsa-mir-335-5p   |      |        |   |                 |
| Up | P4HA3    | 2 | hsa-mir-124-3p   |      |        |   |                 |
| Up | AMIGO2   | 2 | hsa-mir-155-5p   |      |        |   |                 |
| Up | MEST     | 2 | hsa-mir-145-5p   |      |        |   |                 |
| Up | CLEC5A   | 2 | hsa-mir-877-3p   |      |        |   |                 |
| Up | BOP1     | 2 | hsa-mir-296-3p   |      |        |   |                 |
| Up | MAP1A    | 2 | hsa-mir-338-3p   |      |        |   |                 |
| Up | GGT5     | 2 | hsa-mir-346      |      |        |   |                 |
| Up | FNDC1    | 2 | hsa-mir-1207-3p  |      |        |   |                 |
| Up | RECQL4   | 2 | hsa-mir-193b-3p  |      |        |   |                 |
| Up | NEIL2    | 2 | hsa-mir-3160-5p  |      |        |   |                 |
| Up | KLK6     | 1 | hsa-let-7f-5p    |      |        |   |                 |
| Up | CLDN2    | 1 | hsa-mir-16-5p    |      |        |   |                 |
| Up | AGT      | 1 | hsa-mir-26b-5p   |      |        |   |                 |
| Up | ETV4     | 1 | hsa-mir-26b-5p   |      |        |   |                 |
| Up | RAD54L   | 1 | hsa-mir-26b-5p   |      |        |   |                 |
| Up | TYMP     | 1 | hsa-mir-92a-3p   |      |        |   |                 |

|    |         |   |                 |
|----|---------|---|-----------------|
| Up | RCN3    | 1 | hsa-mir-92a-3p  |
| Up | LRFN4   | 1 | hsa-mir-98-5p   |
| Up | COL6A3  | 1 | hsa-mir-29b-3p  |
| Up | TREM2   | 1 | hsa-mir-34a-5p  |
| Up | ACAN    | 1 | hsa-mir-181a-5p |
| Up | COL16A1 | 1 | hsa-mir-181a-5p |
| Up | IQGAP3  | 1 | hsa-mir-1-3p    |
| Up | OLFML2B | 1 | hsa-mir-30b-5p  |
| Up | NCF2    | 1 | hsa-mir-124-3p  |
| Up | SLC1A3  | 1 | hsa-mir-124-3p  |
| Up | HKDC1   | 1 | hsa-mir-124-3p  |
| Up | THBS4   | 1 | hsa-mir-142-3p  |
| Up | IDO1    | 1 | hsa-mir-153-3p  |
| Up | LGI2    | 1 | hsa-mir-149-5p  |
| Up | GUCY1B3 | 1 | hsa-mir-186-5p  |
| Up | PVT1    | 1 | hsa-mir-186-5p  |
| Up | AQP1    | 1 | hsa-mir-320a    |
| Up | RGS1    | 1 | hsa-mir-374a-5p |
| Up | APOC1   | 1 | hsa-mir-335-5p  |
| Up | COL11A1 | 1 | hsa-mir-335-5p  |
| Up | CST1    | 1 | hsa-mir-335-5p  |
| Up | CHRDL2  | 1 | hsa-mir-335-5p  |
| Up | ATP10A  | 1 | hsa-mir-335-5p  |
| Up | GAL3ST4 | 1 | hsa-mir-335-5p  |
| Up | NRK     | 1 | hsa-mir-335-5p  |
| Up | TRPM2   | 1 | hsa-mir-423-3p  |
| Up | GUCY1A3 | 1 | hsa-mir-412-3p  |
| Up | RFTN1   | 1 | hsa-mir-484     |
| Up | TPX2    | 1 | hsa-mir-193b-3p |
| Up | EPPK1   | 1 | hsa-mir-193b-3p |
| Up | DNM1    | 1 | hsa-mir-615-3p  |
| Up | KLHL29  | 1 | hsa-mir-127-5p  |
| Up | ADAMTS2 | 1 | hsa-mir-106b-3p |
| Up | CTSK    | 1 | hsa-mir-296-3p  |
| Up | FCER1G  | 1 | hsa-mir-1225-3p |
| Up | CPZ     | 1 | hsa-mir-1909-5p |

Degree – No of miRNA interact with target gene. We taken any one miRNA in table.

**Table 9** TF - target gene interaction table

| Regulation | TF     | Degree | Target Gene | Regulation | TF     | Degree | Target Gene |
|------------|--------|--------|-------------|------------|--------|--------|-------------|
| Up         | SOX2   | 247    | ABCA13      | Down       | TP63   | 177    | DNER        |
| Up         | MYC    | 215    | ACTN1       | Down       | STAT3  | 169    | CKB         |
| Up         | EGR1   | 202    | ABCD1       | Down       | HNF4A  | 165    | PKIB        |
| Up         | SPI1   | 202    | ADAMTS14    | Down       | AR     | 164    | RAB27B      |
| Up         | NANOG  | 194    | ADAMTS4     | Down       | SUZ12  | 150    | IRX3        |
| Up         | TP63   | 189    | ABCA1       | Down       | EGR1   | 149    | GHRL        |
| Up         | TP53   | 182    | ACAN        | Down       | SMAD4  | 133    | CAPN8       |
| Up         | POU5F1 | 180    | ADAM12      | Down       | SPI1   | 131    | APOBEC1     |
| Up         | AR     | 179    | ADAMTS12    | Down       | NANOG  | 131    | EPB41L4B    |
| Up         | STAT3  | 179    | ADAMTS9     | Down       | MYC    | 129    | ASAH2       |
| Up         | SUZ12  | 175    | ADAMTS2     | Down       | TP53   | 120    | C6          |
| Up         | RUNX1  | 170    | ADCY3       | Down       | POU5F1 | 113    | GSTA3       |
| Up         | HNF4A  | 165    | AGT         | Down       | MTF2   | 112    | HRH2        |
| Up         | FLI1   | 155    | AMIGO2      | Down       | REST   | 108    | DSC2        |
| Up         | MITF   | 149    | AEBP1       | Down       | MITF   | 103    | KCNJ16      |
| Up         | SMAD4  | 137    | ANGPT2      | Down       | RUNX1  | 102    | CA9         |
| Up         | E2F1   | 131    | APLN        | Down       | GATA2  | 101    | NCAM1       |
| Up         | PPARG  | 129    | ALDH1A3     | Down       | GATA1  | 96     | GATA5       |
| Up         | GATA2  | 129    | APOE        | Down       | TCF4   | 95     | TMEM92      |
| Up         | KLF4   | 123    | AJUBA       | Down       | PPARG  | 87     | SERPINB7    |
| Up         | MTF2   | 121    | ANKRD13B    | Down       | FLI1   | 86     | MAMDC2      |
| Up         | GATA1  | 120    | ANLN        | Down       | ESR1   | 84     | SCNN1B      |
| Up         | PPARD  | 119    | AHNAK2      | Down       | SRY    | 84     | SLC25A4     |
| Up         | REST   | 117    | ARHGAP11A   | Down       | RUNX2  | 84     | SLC5A5      |
| Up         | SETDB1 | 114    | ARMC9       | Down       | TFAP2C | 83     | ARHGDI3     |



|    |         |     |          |      |         |    |           |
|----|---------|-----|----------|------|---------|----|-----------|
| Up | SRY     | 107 | APOC1    | Down | SIN3B   | 83 | IGFALS    |
| Up | SMAD3   | 106 | ANGPTL2  | Down | E2F1    | 77 | BTNL8     |
| Up | SOX9    | 105 | ANTXR1   | Down | SETDB1  | 77 | MRAP2     |
| Up | ESR1    | 105 | ATP10A   | Down | TCF3    | 76 | GABRB3    |
| Up | RUNX2   | 104 | AQP9     | Down | PPARD   | 72 | DNMBP-AS1 |
| Up | TCF3    | 102 | ASPM     | Down | EZH2    | 72 | KCNQ1     |
| Up | TRIM28  | 102 | ATAD2    | Down | SALL4   | 72 | STYK1     |
| Up | EP300   | 100 | ANXA13   | Down | RNF2    | 71 | DUOXA2    |
| Up | TCF4    | 97  | ARHGAP39 | Down | SMARCA4 | 71 | OXCT1     |
| Up | TET1    | 97  | ATP11A   | Down | SOX9    | 68 | SCARA5    |
| Up | SMARCA4 | 97  | BCAT1    | Down | SMAD3   | 67 | AKR1C2    |
| Up | KDM5B   | 95  | ATAD5    | Down | TRIM28  | 67 | DHCR24    |
| Up | TFAP2C  | 95  | BGN      | Down | EP300   | 65 | MUC1      |
| Up | EZH2    | 92  | BICC1    | Down | BMI1    | 63 | MAL       |
| Up | SIN3B   | 91  | CACNA1E  | Down | JARID2  | 61 | CDHR2     |
| Up | TAL1    | 84  | AQP1     | Down | TET1    | 59 | RANBP3L   |
| Up | CREM    | 84  | BUB1     | Down | RCOR3   | 58 | SLC26A7   |
| Up | YAP1    | 84  | CCND2    | Down | YAP1    | 57 | ALDH3A1   |
| Up | E2F4    | 83  | BUB1B    | Down | PBX1    | 57 | CCL28     |
| Up | RCOR3   | 83  | C1R      | Down | RAD21   | 53 | HPN       |
| Up | WT1     | 80  | BOC      | Down | FOXP1   | 53 | ID1       |
| Up | RNF2    | 79  | BMP1     | Down | CREM    | 53 | PTGDR2    |
| Up | CREB1   | 79  | BOP1     | Down | TAL1    | 51 | PAIP2B    |
| Up | ASH2L   | 79  | CBX2     | Down | OLIG2   | 51 | TMEM100   |
| Up | EOMES   | 78  | C1QTNF6  | Down | EOMES   | 50 | RASEF     |
| Up | FOXP1   | 78  | C2CD4A   | Down | POU3F2  | 50 | SLC2A12   |
| Up | ATF3    | 77  | CCDC80   | Down | ZNF217  | 48 | B4GALNT2  |
| Up | ZNF281  | 74  | CAMK2N1  | Down | BACH1   | 48 | GDPD2     |
| Up | PRDM14  | 74  | CD109    | Down | CREB1   | 47 | EEF1A2    |
| Up | CUX1    | 72  | CAD      | Down | ASH2L   | 47 | PM20D1    |
| Up | RELA    | 71  | BCL2A1   | Down | CUX1    | 45 | GCNT2     |
| Up | SMAD2   | 71  | CALD1    | Down | ERG     | 44 | GPRC5C    |
| Up | FOXA2   | 70  | C3       | Down | NR3C1   | 43 | PRIMA1    |
| Up | BACH1   | 70  | CENPF    | Down | CTNNB1  | 42 | AADAC     |
| Up | SCLY    | 66  | C5AR1    | Down | PRDM14  | 42 | EYA2      |
| Up | JARID2  | 63  | CDH11    | Down | CEBPB   | 42 | GCNT4     |
| Up | SOX17   | 62  | CDC6     | Down | KDM5B   | 42 | IRX5      |
| Up | ERG     | 60  | CD248    | Down | SOX17   | 42 | ORM1      |
| Up | DMRT1   | 58  | CDH13    | Down | ARNT    | 42 | SLC1A2    |
| Up | NR3C1   | 58  | CDH17    | Down | ZNF281  | 41 | C1orf210  |
| Up | STAT4   | 57  | CCNF     | Down | ATF3    | 41 | TM7SF2    |
| Up | NR0B1   | 57  | CDH3     | Down | TFAP2A  | 40 | CCKBR     |
| Up | ZNF217  | 57  | CLDN4    | Down | NR0B1   | 40 | NWD1      |
| Up | RAD21   | 57  | CLSPN    | Down | DMRT1   | 39 | TM6SF2    |
| Up | NFE2L2  | 55  | CEP170   | Down | NFE2L2  | 37 | HAPLN1    |
| Up | JUN     | 55  | CLDN1    | Down | E2F4    | 36 | EDARADD   |
| Up | LMO2    | 53  | BMP8A    | Down | STAT5A  | 36 | XK        |
| Up | MECOM   | 53  | CCL3     | Down | LMO2    | 35 | CTSE      |
| Up | BMI1    | 53  | CDX2     | Down | SCLY    | 35 | INSIG1    |
| Up | TBX5    | 52  | CDCA7    | Down | TEAD4   | 35 | SH3BGR2   |
| Up | EWSR1   | 51  | CCL18    | Down | SMAD2   | 34 | GKN1      |
| Up | CEBPB   | 51  | CDC25B   | Down | RCOR1   | 34 | RASSF6    |
| Up | MYCN    | 50  | COL12A1  | Down | WT1     | 34 | TPD52L1   |
| Up | OLIG2   | 49  | CD300LF  | Down | JUN     | 33 | CAPN9     |
| Up | TFAP2A  | 49  | CDA5     | Down | YY1     | 33 | CYP3A4    |
| Up | RBPJ    | 49  | COL16A1  | Down | KLF1    | 31 | CYB5A     |
| Up | FOXP2   | 48  | CELSR3   | Down | TBX5    | 31 | DUSP19    |
| Up | PBX1    | 45  | CKAP2    | Down | EWSR1   | 31 | GKN2      |
| Up | EED     | 45  | COL4A1   | Down | RBPJ    | 30 | FMO6P     |
| Up | ZFX     | 44  | CTSB     | Down | RELA    | 30 | TFF1      |
| Up | GATA4   | 44  | DYSF     | Down | CDX2    | 29 | APOA4     |
| Up | TCF7    | 43  | CHRD2    | Down | EED     | 28 | TMEM229A  |
| Up | KLF1    | 42  | COL5A2   | Down | CTCF    | 26 | IGSF9     |
| Up | CTNNB1  | 41  | CHI3L1   | Down | PHC1    | 26 | NKX6-2    |
| Up | GFI1B   | 41  | CLEC5A   | Down | ZFX     | 26 | SH3GL2    |
| Up | TFCP2L1 | 41  | CRISPLD1 | Down | AHR     | 26 | VSTM2A    |
| Up | FOXO3   | 41  | CSF3R    | Down | MYCN    | 25 | ESRRG     |
| Up | YY1     | 39  | CHN1     | Down | MYBL2   | 24 | CNTD1     |
| Up | CCND1   | 39  | CHTF18   | Down | FOXP2   | 24 | DHRS9     |
| Up | PAX3    | 39  | DKK2     | Down | FOXO3   | 24 | F2RL1     |



|    |        |    |            |      |        |    |          |
|----|--------|----|------------|------|--------|----|----------|
| Up | ESRRB  | 37 | COL18A1    | Down | TBX3   | 24 | OASL     |
| Up | CTCF   | 37 | DNM1       | Down | PAX3   | 23 | ANXA10   |
| Up | TBX3   | 37 | EGR2       | Down | MEIS1  | 23 | ARHGEF37 |
| Up | POU3F2 | 36 | CD84       | Down | ESR2   | 23 | MAOA     |
| Up | CNOT3  | 36 | CLDN3      | Down | MECOM  | 23 | PTGER3   |
| Up | SOX11  | 36 | CTHRC1     | Down | GATA4  | 23 | PXMP2    |
| Up | NR1I2  | 34 | COL5A3     | Down | DNAJC2 | 23 | VSIG2    |
| Up | PHC1   | 34 | COMP       | Down | SIN3A  | 22 | C16ORF89 |
| Up | NR1H3  | 33 | COL4A2     | Down | TCF7   | 21 | AMPD1    |
| Up | NACC1  | 33 | ENC1       | Down | PAX6   | 21 | ATP4B    |
| Up | ELK1   | 33 | EPPK1      | Down | TAF7L  | 20 | C11ORF86 |
| Up | HOXB4  | 33 | F2RL2      | Down | NR1I2  | 20 | CYP2C18  |
| Up | RCOR1  | 32 | COL10A1    | Down | HTT    | 20 | CYP2C8   |
| Up | ZFP42  | 31 | COL1A2     | Down | CNOT3  | 19 | CHGB     |
| Up | ELF5   | 31 | CRABP2     | Down | GFI1B  | 19 | CTAGE5   |
| Up | VDR    | 31 | DUSP10     | Down | NACC1  | 19 | KLF2     |
| Up | DNAJC2 | 30 | COL7A1     | Down | STAT4  | 18 | RAB37    |
| Up | LYL1   | 29 | COL5A1     | Down | ELF5   | 17 | CAPN13   |
| Up | ARNT   | 29 | CPXM2      | Down | PRDM5  | 17 | CKMT2    |
| Up | HOXC9  | 28 | CLSTN3     | Down | STAT1  | 17 | LIFR     |
| Up | MEIS1  | 27 | BACH1      | Down | ELK1   | 17 | MYRIP    |
| Up | DACH1  | 27 | CSGALNACT2 | Down | GATA3  | 17 | UNC5D    |
| Up | TTF2   | 27 | E2F3       | Down | TCF7L2 | 16 | FCGBP    |
| Up | IRF8   | 27 | ENTPD1     | Down | CEBPA  | 16 | GC       |
| Up | SMAD1  | 27 | F2R        | Down | TTF2   | 16 | POU2AF1  |
| Up | RARG   | 26 | DPYSL3     | Down | MYB    | 16 | SLPI     |
| Up | XRN2   | 26 | EXO1       | Down | NR1H3  | 15 | ALDOC    |
| Up | HSF1   | 25 | DNM3OS     | Down | PADI4  | 15 | CHIA     |
| Up | PHF8   | 25 | FAM83D     | Down | HOXB4  | 15 | METTL7A  |
| Up | GATA3  | 25 | GDF15      | Down | SREBF2 | 15 | REP15    |
| Up | ELF1   | 24 | CPXM1      | Down | HOXC9  | 14 | ELOVL6   |
| Up | FOXP3  | 23 | ECT2       | Down | HSF1   | 14 | GGT6     |
| Up | STAT5A | 23 | GBP5       | Down | CCND1  | 14 | GLUL     |
| Up | DROSHA | 22 | COL15A1    | Down | SMAD1  | 14 | PAQR8    |
| Up | MEF2A  | 22 | HMCN1      | Down | LYL1   | 14 | SCGN     |
| Up | PAX6   | 20 | ASH2L      | Down | DROSHA | 14 | SHISA6   |
| Up | SIN3A  | 20 | COL8A1     | Down | FOXO1  | 13 | AZGP1    |
| Up | PRDM5  | 20 | CYP2W1     | Down | SOX11  | 13 | C1ORF115 |
| Up | CLOCK  | 20 | DIO2       | Down | MEF2A  | 13 | CDH2     |
| Up | TCF7L2 | 20 | EPHB1      | Down | NFIB   | 13 | SCUBE2   |
| Up | KDM5A  | 20 | ESPL1      | Down | ELF1   | 12 | AQP10    |
| Up | AHR    | 20 | FN1        | Down | TBP    | 12 | GALE     |
| Up | STAT1  | 20 | IER5L      | Down | SRF    | 12 | GPT2     |
| Up | PADI4  | 19 | CPS1       | Down | ZFP42  | 12 | HYAL1    |
| Up | SRF    | 18 | EPHA3      | Down | IRF8   | 12 | TMEM151A |
| Up | CRX    | 18 | FCGR1A     | Down | SREBF1 | 11 | ALDOB    |
| Up | STAT6  | 18 | HAPLN3     | Down | VDR    | 11 | GALNT5   |
| Up | RCOR2  | 16 | DGKH       | Down | IRF1   | 11 | HHLA2    |
| Up | SREBF2 | 16 | GEM        | Down | XRN2   | 11 | SOX21    |
| Up | SREBF1 | 15 | FLRT2      | Down | CLOCK  | 10 | AQP4     |
| Up | ESR2   | 15 | H19        | Down | CEBPD  | 9  | PAPPA2   |
| Up | CEBPD  | 15 | MMP16      | Down | HIF1A  | 9  | UPK1B    |
| Up | NUCKS1 | 14 | DOCK4      | Down | DACH1  | 8  | FOXQ1    |
| Up | THAP11 | 13 | FGD6       | Down | DCP1A  | 8  | MT1E     |
| Up | TAF7L  | 13 | FKBP10     | Down | STAT6  | 8  | PLL      |
| Up | ZIC3   | 12 | FBXO32     | Down | RARG   | 8  | PRSS8    |
| Up | DCP1A  | 12 | FSCN1      | Down | CRX    | 7  | HOMER2   |
| Up | ETS1   | 12 | GRIN2D     | Down | GBX2   | 7  | SLC16A7  |
| Up | GBX2   | 12 | LCP2       | Down | PDX1   | 7  | SLC7A8   |
| Up | IRF1   | 12 | LEF1       | Down | THAP11 | 7  | SLC9A1   |
| Up | CEBPA  | 11 | CYP2B6     | Down | PHF8   | 7  | XYLT2    |
| Up | KDM6A  | 11 | FANCD2     | Down | KDM5A  | 6  | ALDH6A1  |
| Up | HOXD13 | 11 | FBN1       | Down | FOXP3  | 6  | FOXA3    |
| Up | NFIB   | 11 | HTRA1      | Down | TFEB   | 6  | KLF15    |
| Up | CHD1   | 11 | IGF2BP3    | Down | BCL3   | 6  | RORC     |
| Up | TFEB   | 10 | FOXM1      | Down | CHD1   | 6  | SOX2     |
| Up | PDX1   | 10 | KIF20A     | Down | RCOR2  | 5  | HAS3     |
| Up | HTT    | 9  | IFI44L     | Down | ZIC3   | 5  | LIPH     |
| Up | HIF1A  | 9  | INHBA      | Down | HOXD13 | 5  | RHBDL2   |
| Up | ASXL1  | 9  | KIF21B     | Down | ZNF274 | 5  | SSTR1    |

|    |          |   |          |      |        |   |          |
|----|----------|---|----------|------|--------|---|----------|
| Up | TBP      | 9 | MMP14    | Down | GLI1   | 4 | ADAMTSL1 |
| Up | E2F7     | 8 | MCM7     | Down | TCF21  | 4 | AKR7A3   |
| Up | NR4A2    | 7 | LILRB3   | Down | ZNF263 | 4 | ITPKA    |
| Up | BCL3     | 6 | CXCL1    | Down | ETS2   | 4 | PRDM16   |
| Up | ZNF274   | 6 | KIF26B   | Down | CHD7   | 3 | APOA1    |
| Up | PRDM16   | 6 | MCM10    | Down | NR4A2  | 3 | CYP3A5   |
| Up | AP1S2    | 6 | PGM2L1   | Down | SALL1  | 3 | GRIA4    |
| Up | THRA     | 5 | IFITM1   | Down | KLF5   | 3 | KLF4     |
| Up | FOXO1    | 5 | NEIL2    | Down | HCFC1  | 3 | SCG3     |
| Up | TCF21    | 5 | NID2     | Down | ZNF652 | 3 | SPDEF    |
| Up | IKZF1    | 5 | PDGFRB   | Down | THRA   | 3 | TMED6    |
| Up | ZNF322   | 5 | PLXNC1   | Down | MYBL1  | 2 | FBP1     |
| Up | ETS2     | 4 | FOXK1    | Down | NUCKS1 | 2 | FGA      |
| Up | CHD7     | 4 | HOXA10   | Down | IKZF1  | 2 | GPX3     |
| Up | HCFC1    | 4 | KIF2C    | Down | ASXL1  | 2 | KIAA0895 |
| Up | GLI1     | 4 | RAI14    | Down | ZNF322 | 2 | RIMS1    |
| Up | KLF2     | 3 | HOXB9    | Down | NOTCH1 | 2 | SOWAHA   |
| Up | BP1      | 3 | IL2RA    | Down | ETS1   | 1 | SMPD3    |
| Up | KLF5     | 3 | NOTCH3   |      |        |   |          |
| Up | SALL1    | 3 | OMD      |      |        |   |          |
| Up | CDKN2AIP | 3 | SPOCK1   |      |        |   |          |
| Up | ZNF263   | 2 | LAMA5    |      |        |   |          |
| Up | MYBL1    | 2 | NEK2     |      |        |   |          |
| Up | ZNF652   | 2 | PLXDC2   |      |        |   |          |
| Up | HOXA2    | 1 | KIAA1755 |      |        |   |          |
| Up | CIITA    | 1 | PARVG    |      |        |   |          |

Degree – No of TF interact with target gene. We taken any one TF in table

## Figures

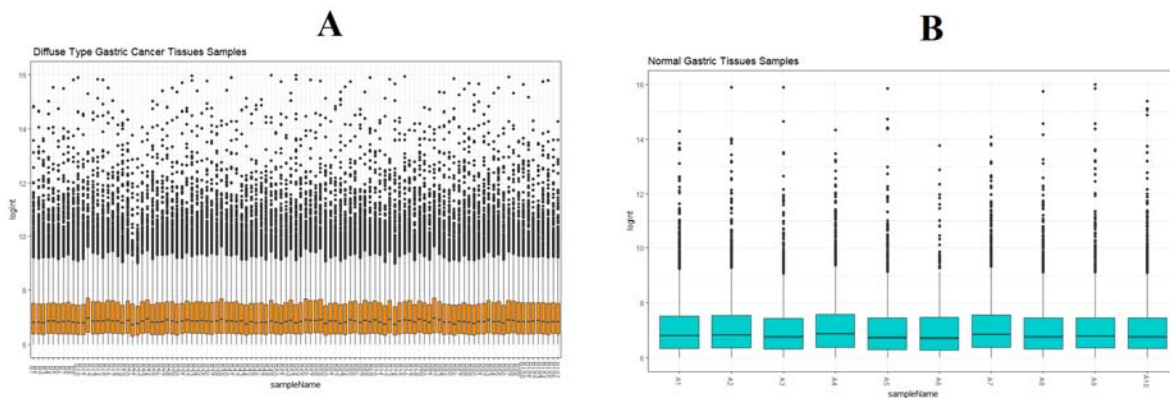

**Fig. 1.** Box plots of the normalized RNA-seq data. (A) 107 GC samples (B) 10 normal gastric tissue samples. Horizontal axis represents the sample symbol and the vertical axis represents the gene expression values. The black line in the box plot represents the median value of gene expression. (A1 – A10 = Normal gastric tissue samples (blue color box); B1 – B107 = GC samples (brown color box))

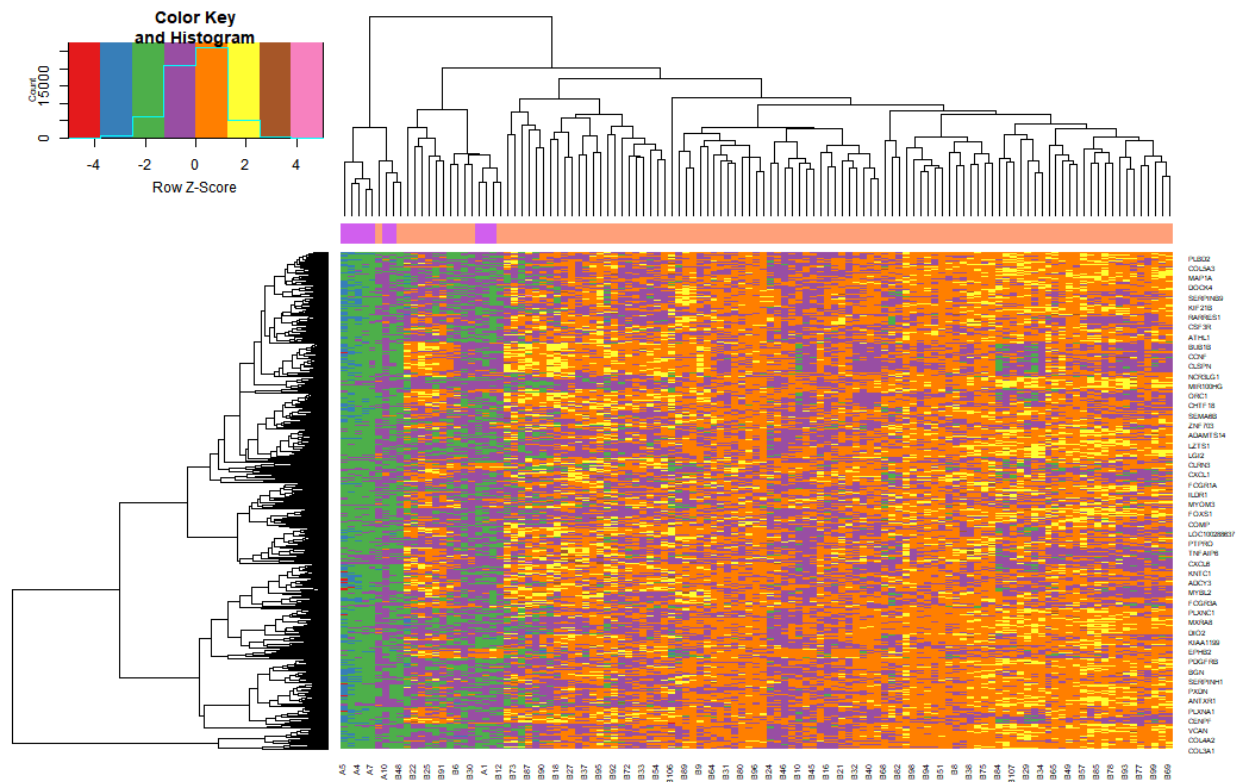

**Fig. 2.** Heat map of up regulated differentially expressed genes. Legend on the top left indicate log fold change of genes. (A1 – A10 = Normal gastric tissue samples; B1 – B107 = GC samples)

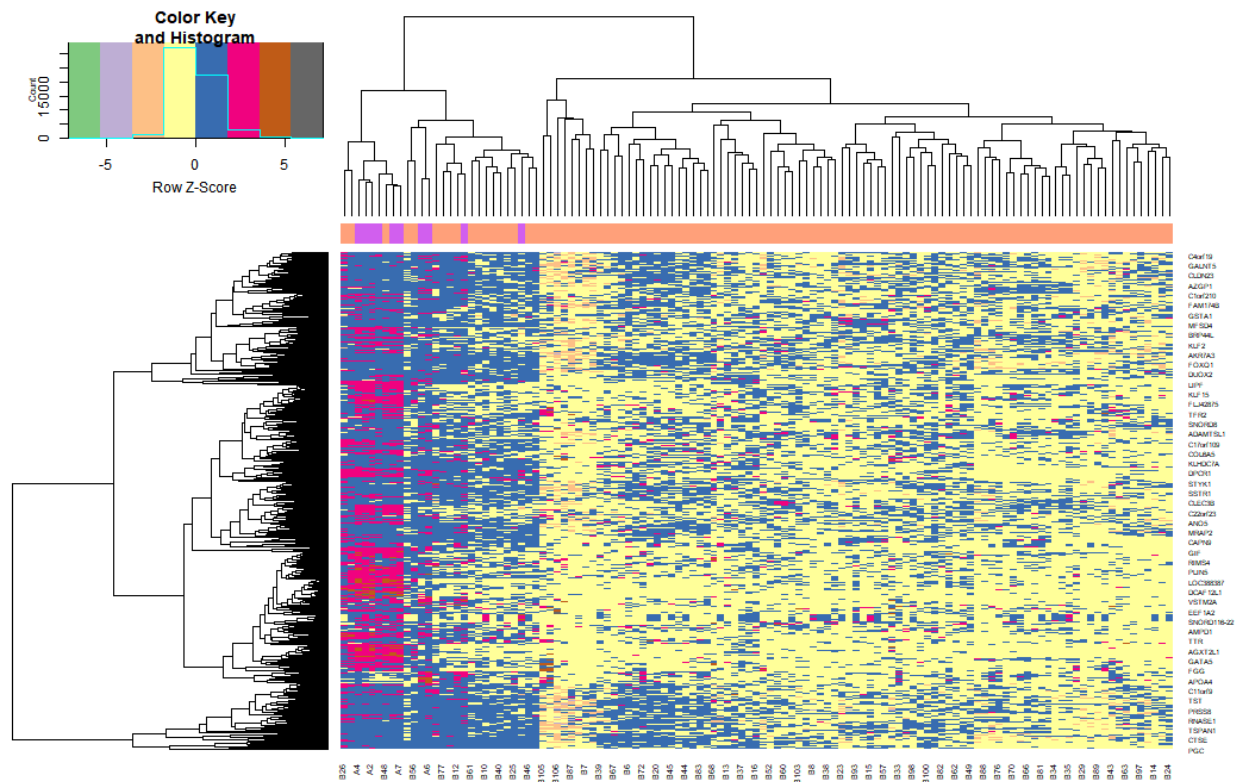

**Fig. 3.** Heat map of down regulated differentially expressed genes. Legend on the top left indicate log fold change of genes. (A1 – A10 = Normal gastric tissue samples; B1 – B107 = GC samples)

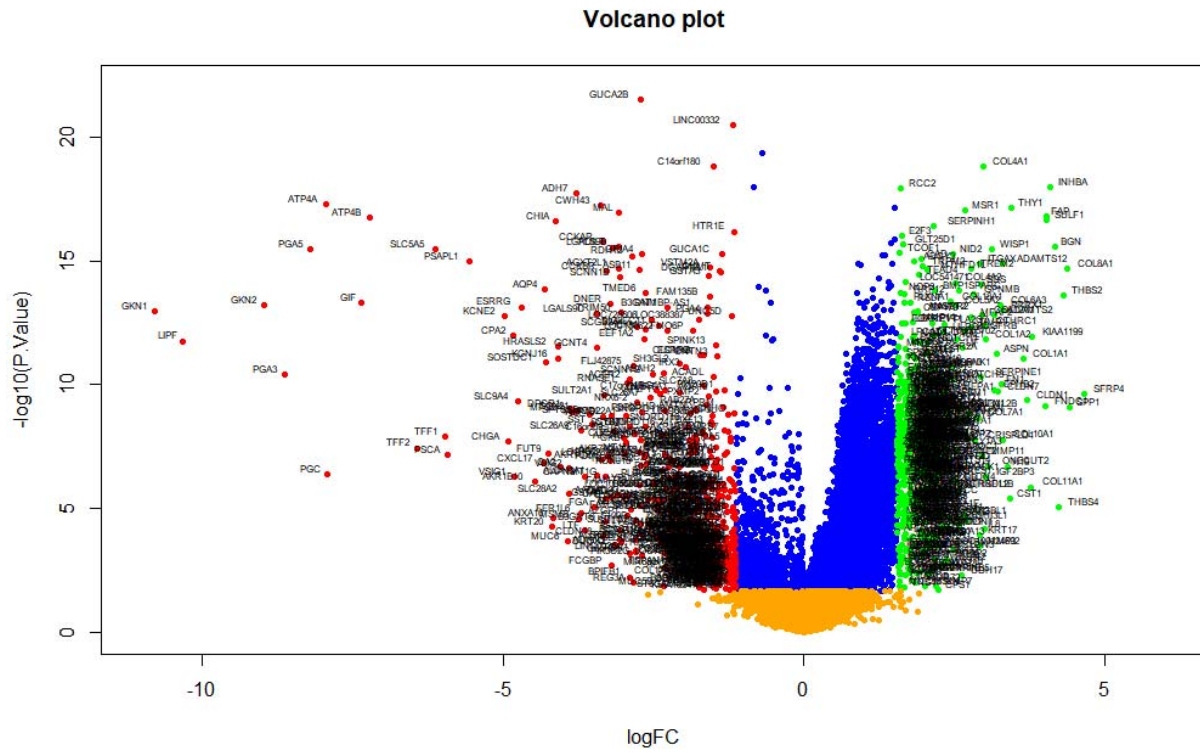

**Fig. 4.** Volcano plot of differentially expressed genes. Genes with a significant change of more than two-fold were selected.

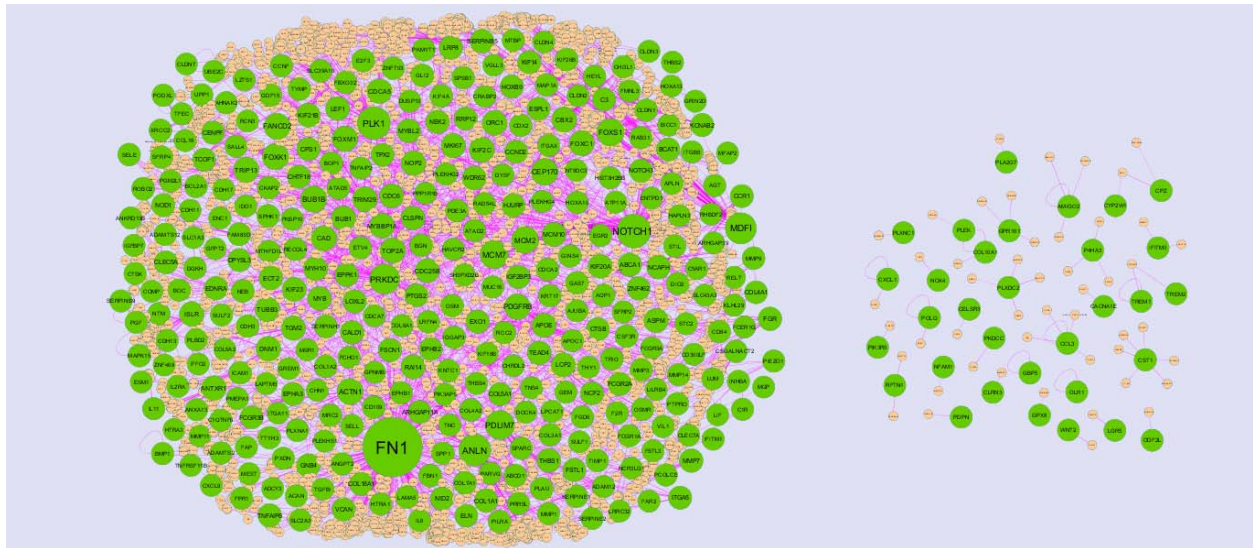

**Fig. 5.** Protein-protein interaction network of up regulated genes. Green nodes denotes up regulated genes.

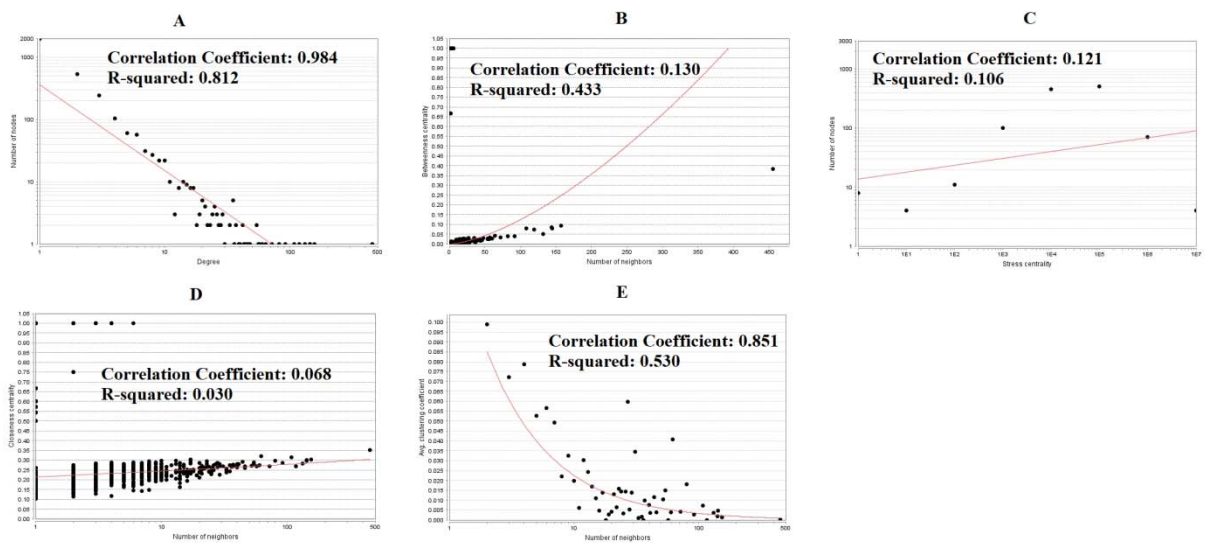

**Fig. 6.** Scatter plot for up regulated genes. (A- Node degree; B- Betweenness centrality; C- Stress centrality ; D- Closeness centrality; E- Clustering coefficient)



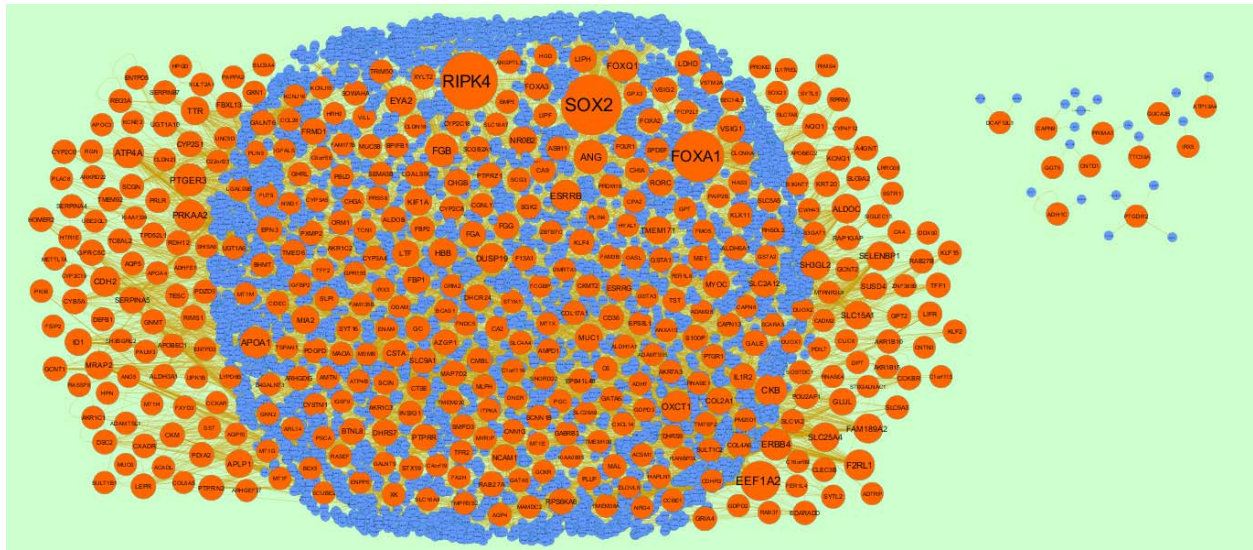

**Fig. 7.** Protein–protein interaction network of down regulated genes. Red nodes denotes down regulated genes.

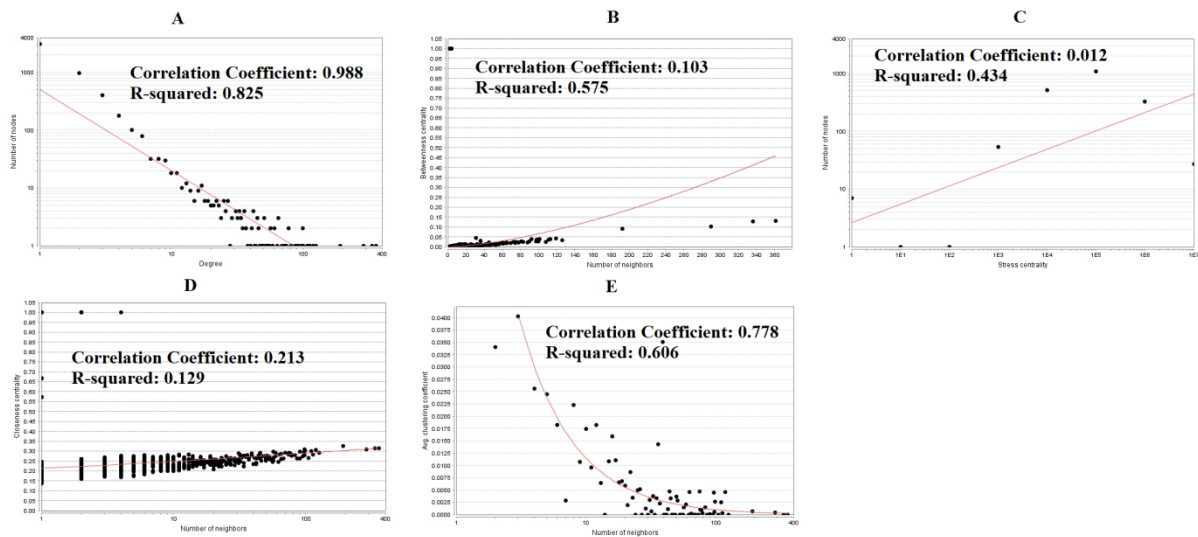

**Fig. 8.** Scatter plot for down regulated genes. (A- Node degree; B- Betweenness centrality; C- Stress centrality ; D- Closeness centrality; E- Clustering coefficient)



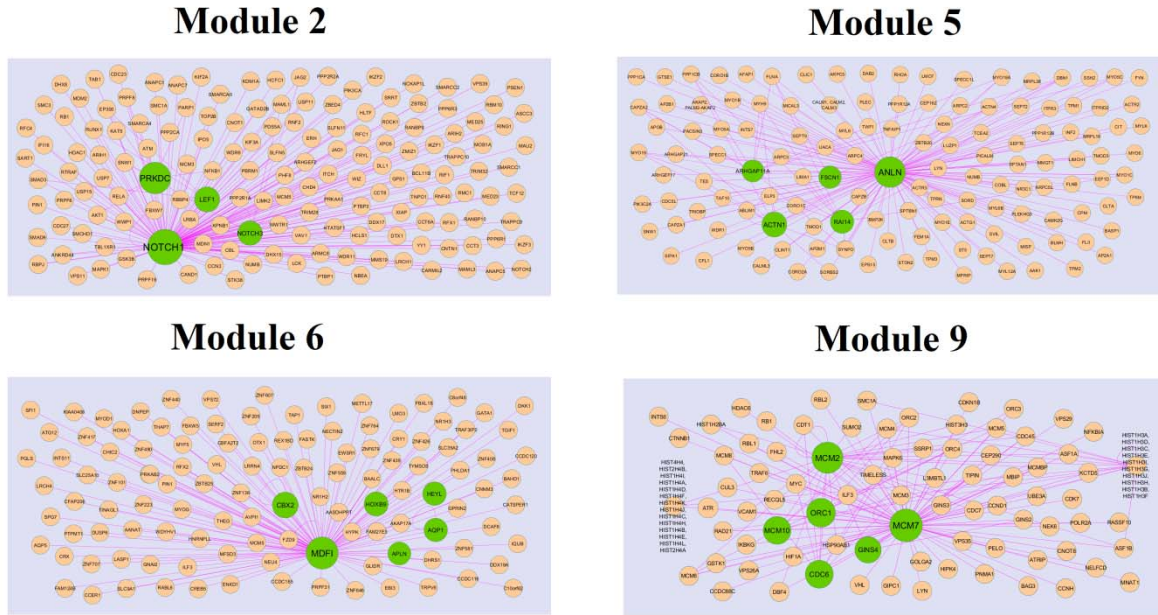

**Fig. 9.** Modules in PPI network. The green nodes denote the up regulated genes

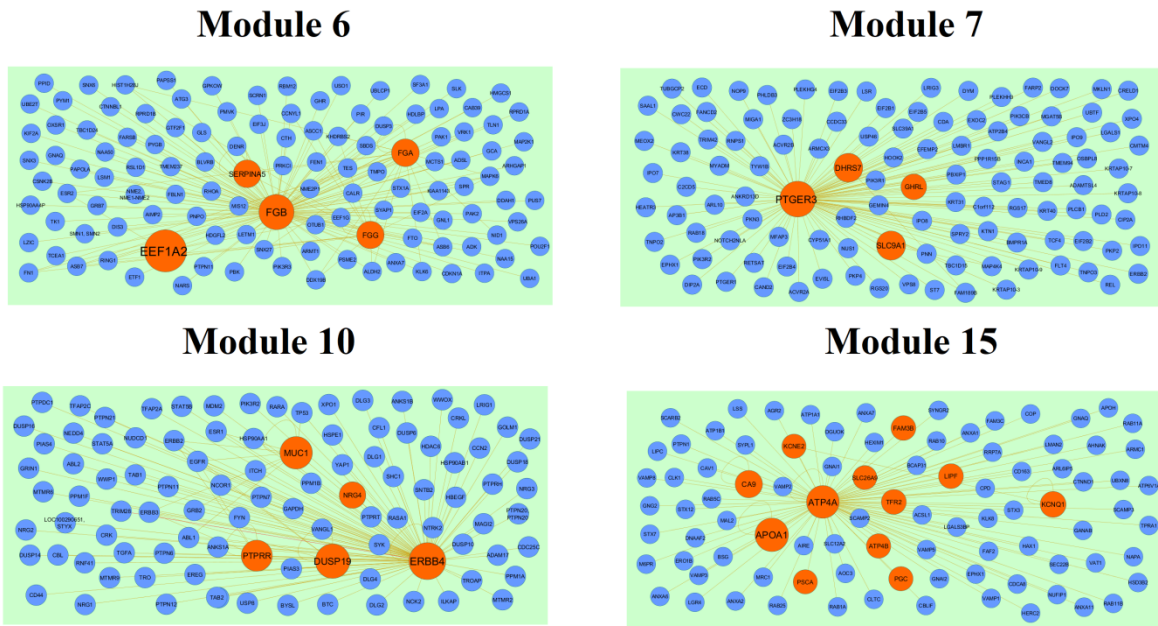

**Fig. 10.** Modules in PPI network. The red nodes denote the down regulated genes

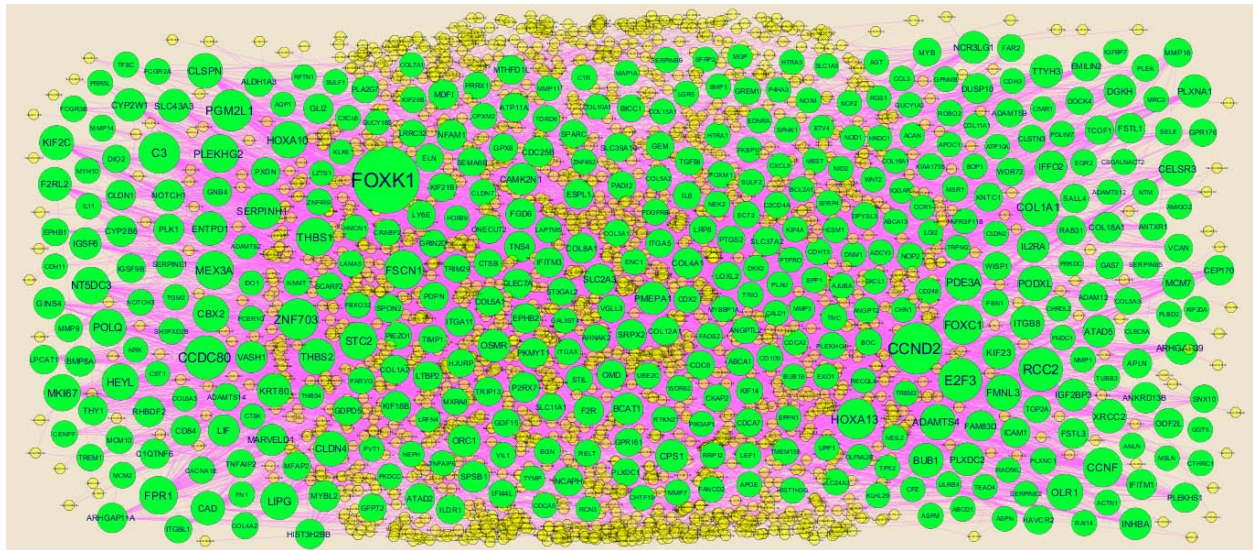

**Fig. 11.** The network of up regulated genes and their related miRNAs. The green circles nodes are the up regulated genes, and yellow diamond nodes are the miRNAs

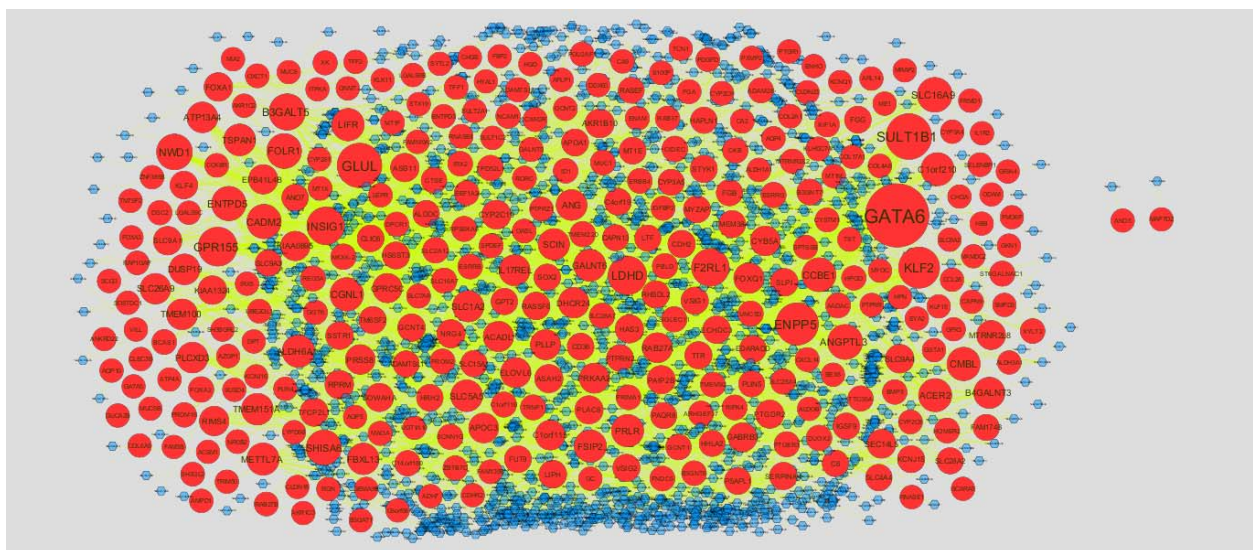

**Fig. 12.** The network of down regulated genes and their related miRNAs. The red circles nodes are the down regulated genes, and blue diamond nodes are the miRNAs



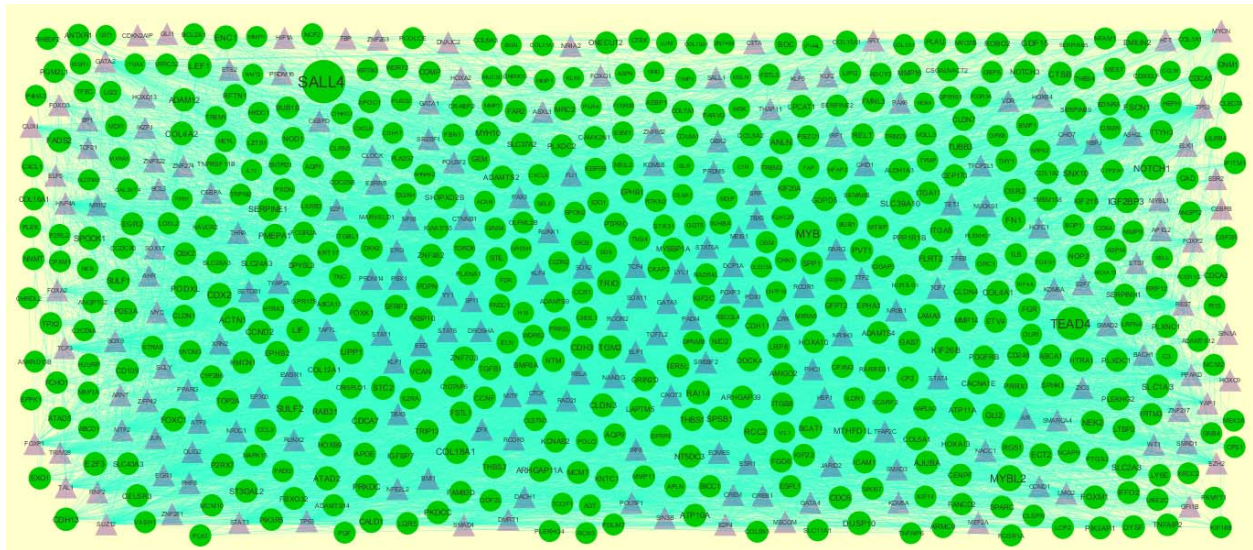

**Fig. 13.** The network of up regulated genes and their related TFs. The green circles nodes are the up regulated genes, and purple triangle nodes are the TFs

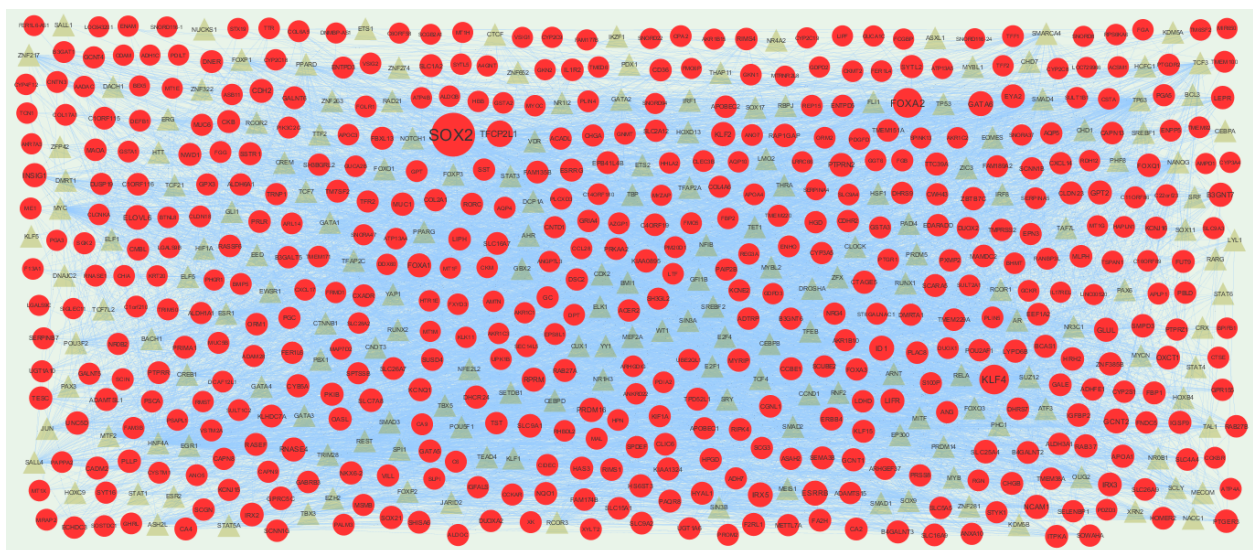

**Fig. 14.** The network of down regulated genes and their related TFs. The green circles nodes are the down regulated genes, and yellow triangle nodes are the TFs.

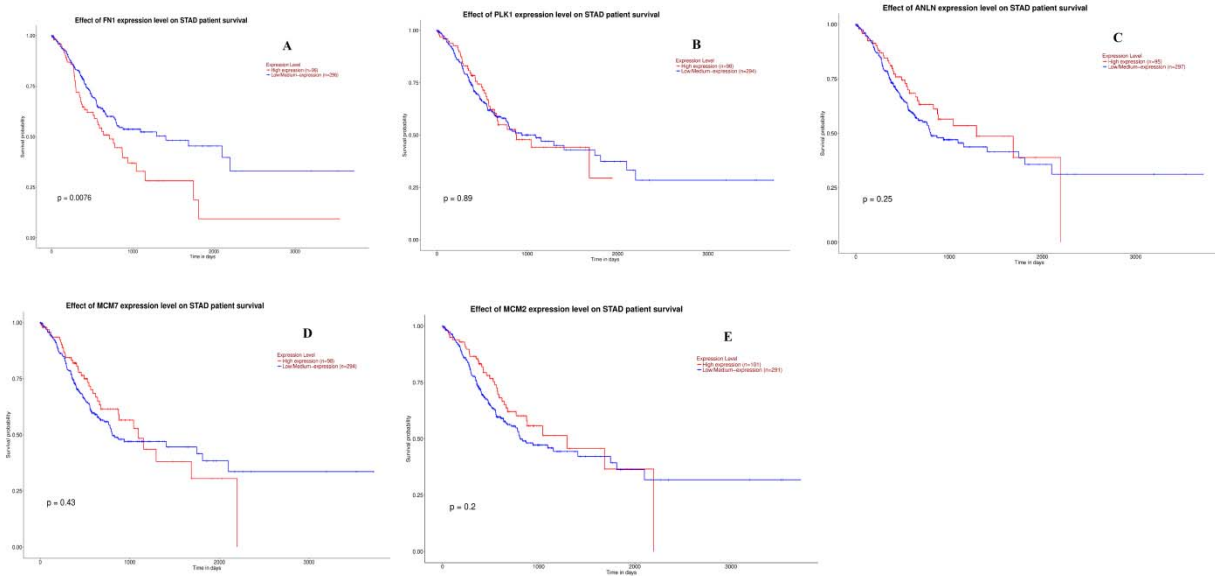

**Fig. 15.** Survival analysis of up regulated hub genes. Survival analyses were performed using the UALCAN online platform. Red line denotes - high expression; Blue line denotes – low expression. A) FN1 B) PLK1 C) ANLN D) MCM7 E) MCM2

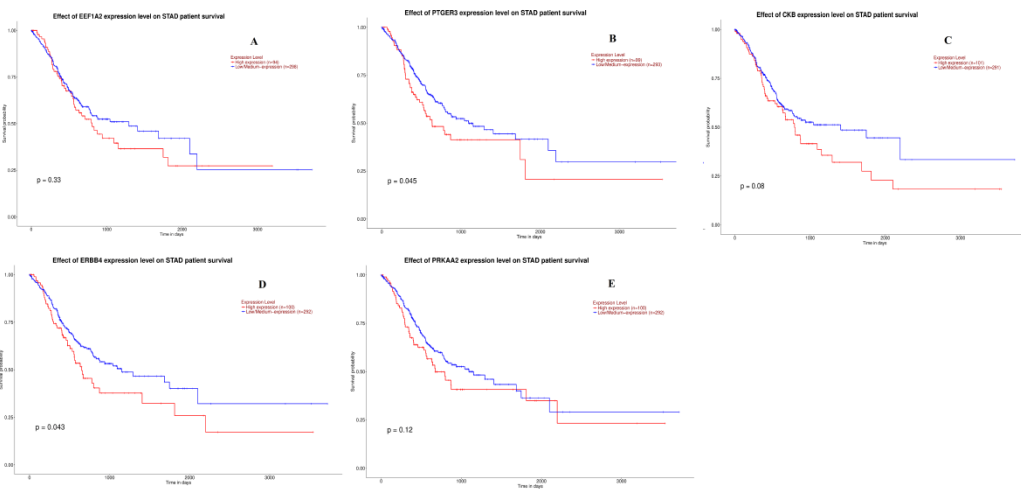

**Fig. 16.** Survival analysis of down regulated hub genes. Survival analyses were performed using the UALCAN online platform. Red line denotes - high expression; Blue line denotes – low expression. A) EEF1A2 B) PTGER3 C) CKB D) ERBB4 E) PRKAA2

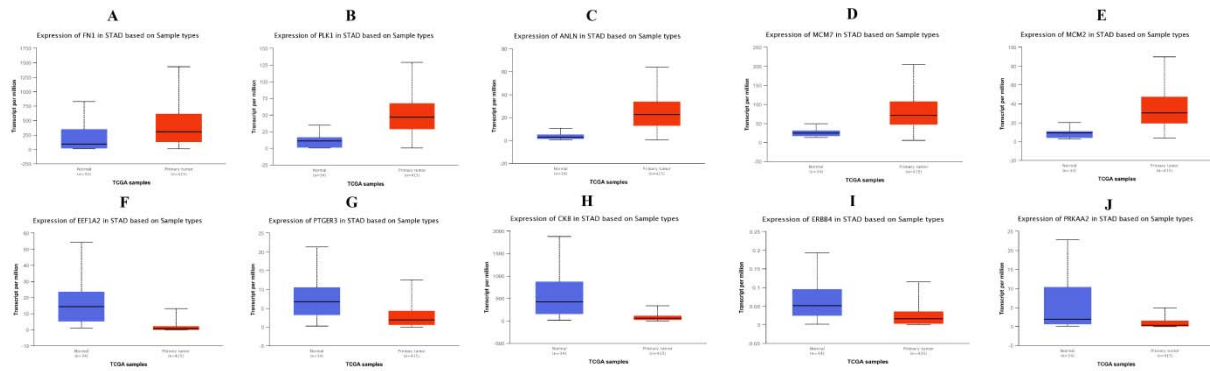

**Fig. 17.** Box plots (expression analysis) hub genes (up and down regulated) were produced using the UALCAN platform. A) FN1 B) PLK1 C) ANLN D) MCM7 E) MCM2 F) EEF1A2 G) PTGER3 H) CKB I) ERBB4 J) PRKAA2

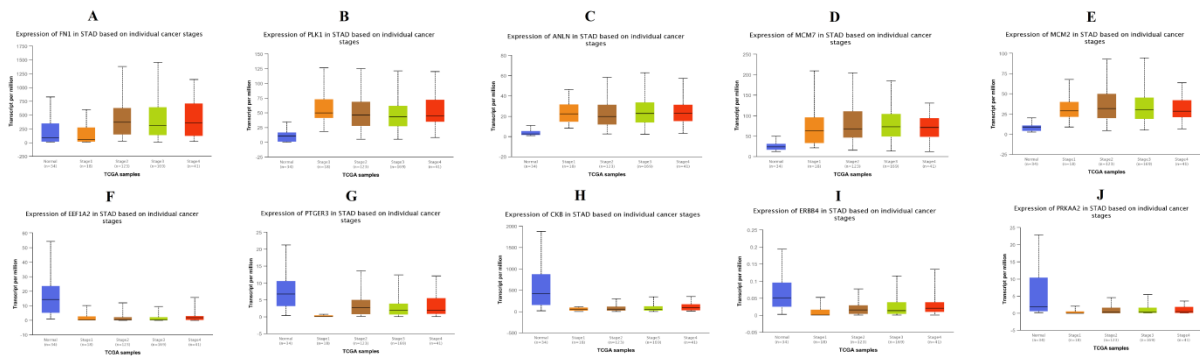

**Fig. 18.** Box plots (stage analysis) of hub genes (up and down regulated) were produced using the UALCAN platform. A) FN1 B) PLK1 C) ANLN D) MCM7 E) MCM2 F) EEF1A2 G) PTGER3 H) CKB I) ERBB4 J) PRKAA2

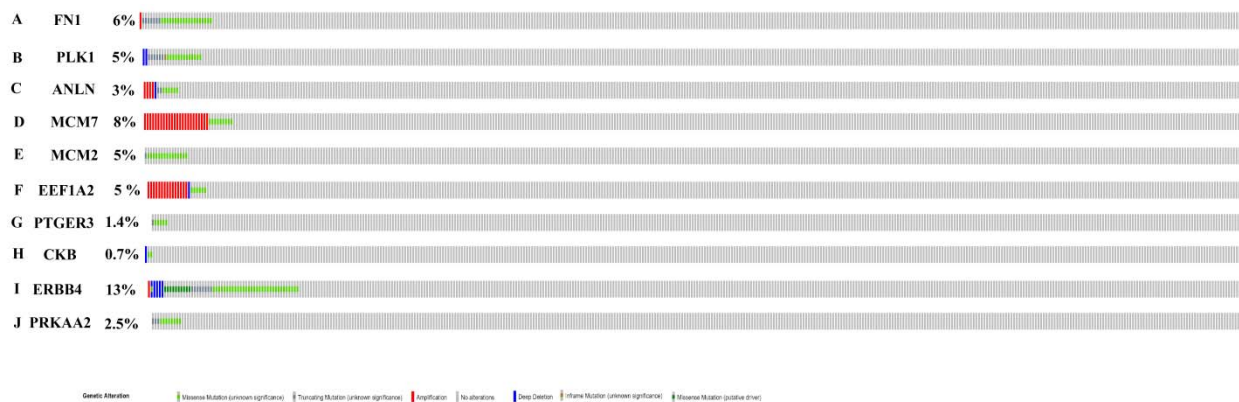

**Fig. 19.** Mutation analyses of hub genes were produced using the CbioPortal online platform. A) FN1 B) PLK1 C) ANLN D) MCM7 E) MCM2 F) EEF1A2 G) PTGER3 H) CKB I) ERBB4 J) PRKAA2

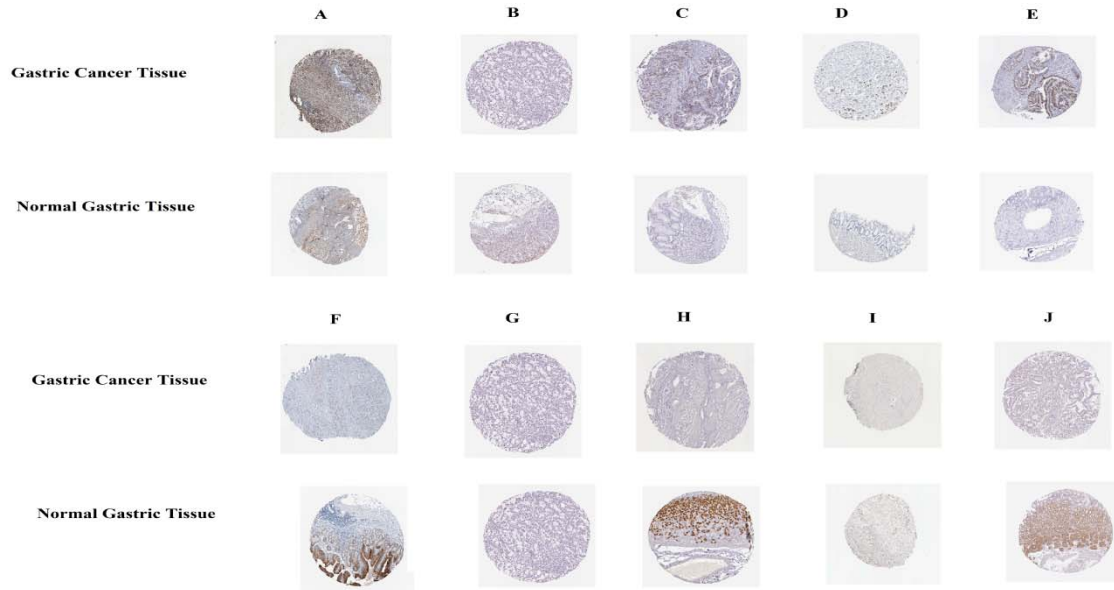

**Fig. 20.** Immunohisto chemical (IHC) analyses of hub genes were produced using the human protein atlas (HPA) online platform. A) FN1 B) PLK1 C) ANLN D) MCM7 E) MCM2 F) EEF1A2 G) PTGER3 H) CKB I) ERBB4 J) PRKAA2

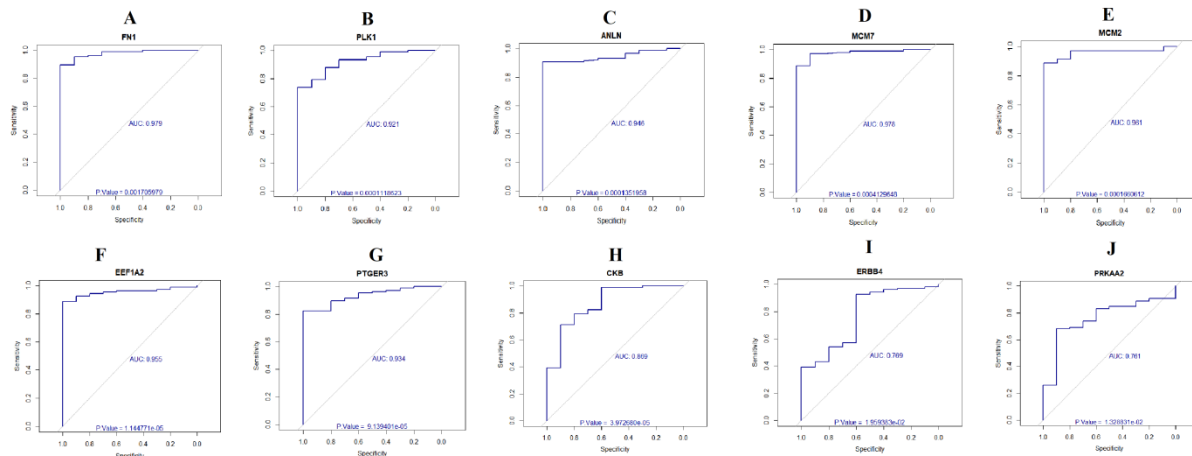

**Fig. 21.** ROC curve validated the sensitivity, specificity of hub genes as a predictive biomarker for hepatoblastoma prognosis. A) FN1 B) PLK1 C) ANLN D) MCM7 E) MCM2 F) EEF1A2 G) PTGER3 H) CKB I) ERBB4 J) PRKAA2



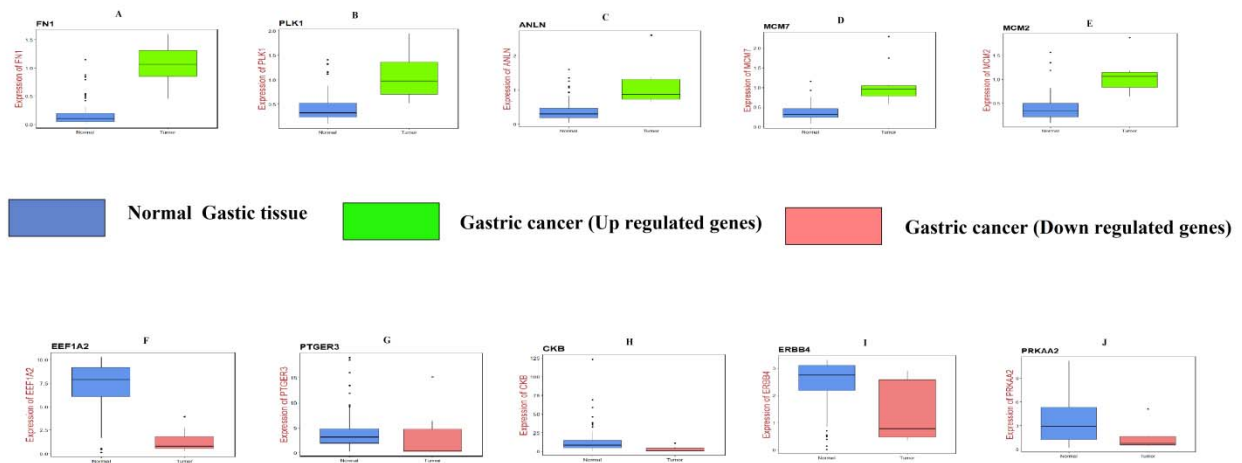

**Fig. 22.** Validation of hub genes (up and down regulated) by RT-PCR. A) FN1 B) PLK1 C) ANLN D) MCM7 E) MCM2 F) EEF1A2 G) PTGER3 H) CKB I) ERBB4 J) PRKAA2

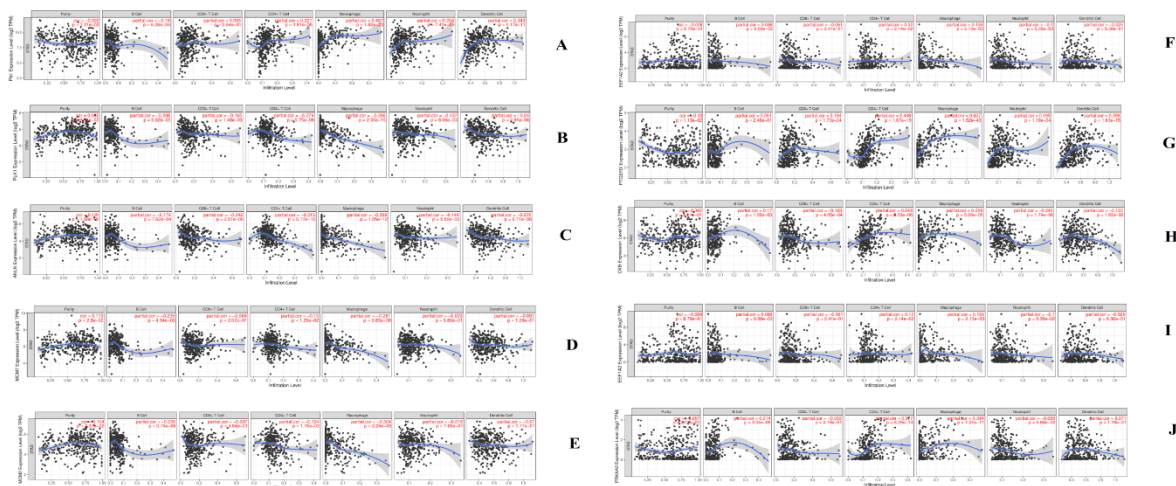

**Fig. 23.** Scatter plot for immune infiltration for hub genes (up and down regulated). A) FN1 B) PLK1 C) ANLN D) MCM7 E) MCM2 F) EEF1A2 G) PTGER3 H) CKB I) ERBB4 J) PRKAA2
